# Supplementary material for: Cofunctional Subpathways Were Regulated by Transcription Factor with Common Motif, Common Family, or Common Tissue
Source: Hindawi journal article supplement (doi:10.1155/2015/780357), 2015-01-01
Supplement: f1 [file 780357.f1.pdf]

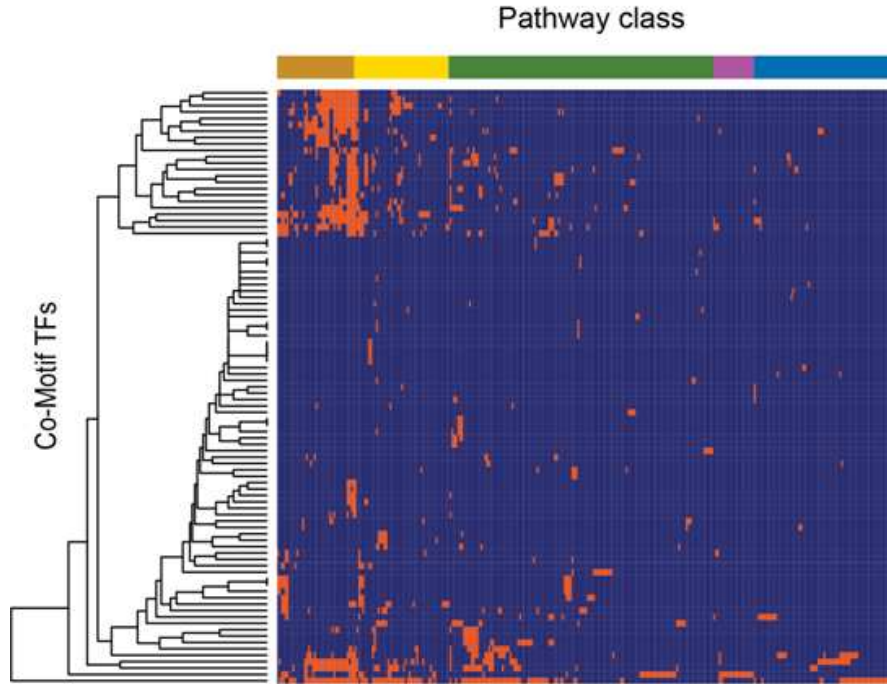

**Figure S1. One-way clustering to TFs with common motif of the TSN with  $k=4$ .** A. One-way clustering between 90 TFs and 320 subpathways. The corresponding cell was colored orange if there was an edge between the TF and subpathway in the TSN with  $k=4$ . Subpathway labels were colored according to the pathway class colors used in Figure 2.

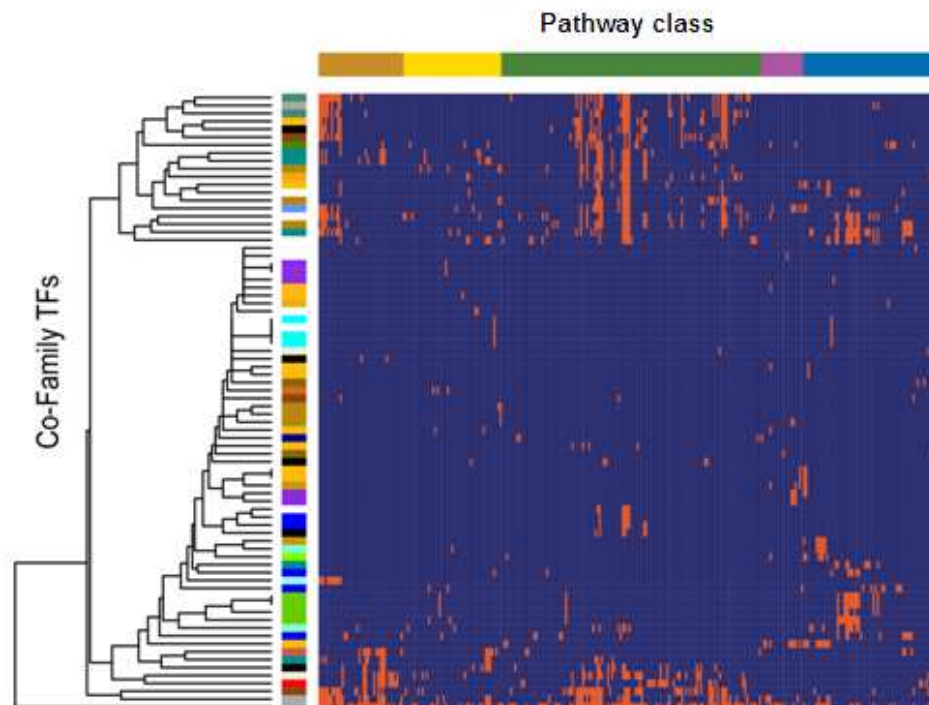

**Figure S2. One-way clustering to TFs with common family of the TSN with  $k=4$ .** A. One-way clustering between 78 TFs and 239 subpathways. The corresponding cell was colored orange if there was an edge between the TF and subpathway in the TSN with  $k=4$ . Subpathway labels were colored according to the pathway class colors used in Figure 2.

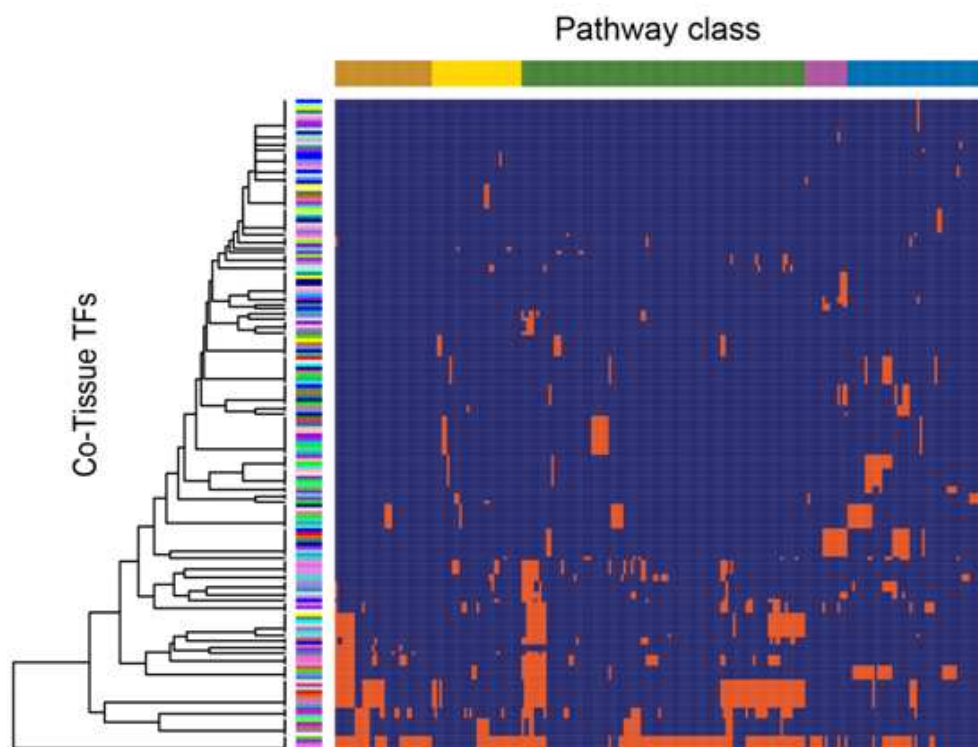

**Figure S3. One-way clustering to TFs with common tissue of the TSN with  $k=4$ .** A. One-way clustering between 60 unique TFs and 269 unique subpathways. The corresponding cell was colored orange if there was an edge between the TF and subpathway in the TSN with  $k=4$ . Subpathway labels were colored according to the pathway class colors used in Figure 2.

**Table S1. The detailed information of the significant TF-subpathway associations between TFs and subpathways in the TSN.**

| TF_Name | Subpathway    | P_Value  |
|---------|---------------|----------|
| TP53    | path:04115_1  | 0        |
| TP53    | path:04115_2  | 0        |
| TP53    | path:04115_3  | 0        |
| TP53    | path:04115_4  | 0        |
| TP53    | path:04115_7  | 0        |
| SP1     | path:04510_1  | 7.85E-13 |
| SP1     | path:04510_19 | 1.96E-12 |
| TP53    | path:04110_1  | 2.55E-11 |
| SP1     | path:04110_18 | 4.28E-11 |
| SP1     | path:04110_19 | 1.05E-10 |
| SP1     | path:04510_10 | 1.05E-10 |
| SP1     | path:04510_6  | 1.07E-10 |
| SP1     | path:04110_17 | 1.86E-10 |
| SP1     | path:04115_1  | 3.47E-10 |
| SP1     | path:04510_8  | 6.16E-10 |
| TCF7L2  | path:04310_7  | 1.19E-09 |
| SP1     | path:04110_20 | 2.92E-09 |
| SP1     | path:04110_27 | 2.92E-09 |
| TP53    | path:04110_7  | 4.42E-09 |
| RELA    | path:04620_12 | 4.80E-09 |
| SP1     | path:04110_23 | 5.22E-09 |
| SP1     | path:05200_51 | 5.54E-09 |
| SP1     | path:04110_3  | 6.46E-09 |
| SP1     | path:04110_4  | 6.46E-09 |
| NR5A1   | path:00140_13 | 6.63E-09 |
| JUND    | path:05200_29 | 6.84E-09 |
| RELA    | path:04620_18 | 8.85E-09 |
| E2F1    | path:04110_17 | 9.20E-09 |
| E2F1    | path:05200_52 | 9.20E-09 |
| RELA    | path:04620_16 | 1.03E-08 |
| TCF7L2  | path:04310_6  | 1.48E-08 |

|       |               |          |
|-------|---------------|----------|
| SP1   | path:05200_52 | 1.55E-08 |
| MITF  | path:04916_3  | 1.75E-08 |
| SP1   | path:05200_47 | 2.07E-08 |
| SP1   | path:05214_14 | 2.07E-08 |
| SP1   | path:05220_9  | 2.07E-08 |
| FOS   | path:05200_29 | 2.16E-08 |
| RELA  | path:04062_2  | 3.87E-08 |
| HNF4A | path:00982_4  | 5.38E-08 |
| HNF4A | path:00982_5  | 5.38E-08 |
| HNF4A | path:00982_9  | 5.38E-08 |
| RELA  | path:04620_17 | 6.51E-08 |
| RELA  | path:04620_22 | 6.51E-08 |
| SP1   | path:04110_26 | 7.70E-08 |
| RELA  | path:04620_9  | 7.78E-08 |
| SP1   | path:04510_18 | 8.07E-08 |
| E2F1  | path:05212_13 | 1.10E-07 |
| E2F1  | path:05219_4  | 1.10E-07 |
| E2F1  | path:05223_3  | 1.10E-07 |
| E2F1  | path:04110_23 | 1.13E-07 |
| E2F1  | path:04110_26 | 1.13E-07 |
| E2F1  | path:04110_3  | 1.13E-07 |
| E2F1  | path:04110_4  | 1.13E-07 |
| E2F1  | path:05214_15 | 1.13E-07 |
| E2F1  | path:05218_7  | 1.13E-07 |
| E2F1  | path:05220_11 | 1.13E-07 |
| SP1   | path:05214_13 | 1.18E-07 |
| SP1   | path:05220_12 | 1.18E-07 |
| SP3   | path:04510_10 | 1.24E-07 |
| SP3   | path:04510_6  | 1.24E-07 |
| SP3   | path:04510_8  | 1.24E-07 |
| RELA  | path:04620_13 | 1.51E-07 |
| RFX3  | path:04514_1  | 1.53E-07 |
| RFX3  | path:04514_3  | 1.53E-07 |
| RFX3  | path:04612_3  | 1.53E-07 |

|       |               |          |
|-------|---------------|----------|
| RFX3  | path:04672_4  | 1.53E-07 |
| RFX3  | path:04672_5  | 1.53E-07 |
| RFX3  | path:04940_1  | 1.53E-07 |
| RFX3  | path:05150_14 | 1.53E-07 |
| RFX3  | path:05310_1  | 1.53E-07 |
| RFX3  | path:05310_3  | 1.53E-07 |
| RFX3  | path:05320_1  | 1.53E-07 |
| RFX3  | path:05320_3  | 1.53E-07 |
| RFX3  | path:05320_4  | 1.53E-07 |
| RFX3  | path:05320_6  | 1.53E-07 |
| RFX3  | path:05322_5  | 1.53E-07 |
| RFX3  | path:05322_6  | 1.53E-07 |
| RFX3  | path:05330_1  | 1.53E-07 |
| RFX3  | path:05330_2  | 1.53E-07 |
| RFX3  | path:05330_4  | 1.53E-07 |
| RFX3  | path:05332_1  | 1.53E-07 |
| RFX3  | path:05416_4  | 1.53E-07 |
| E2F1  | path:04110_19 | 1.74E-07 |
| E2F1  | path:05200_53 | 1.85E-07 |
| RELA  | path:04062_1  | 2.04E-07 |
| RELA  | path:04620_14 | 2.07E-07 |
| SP3   | path:04110_19 | 2.26E-07 |
| SP3   | path:04512_5  | 2.26E-07 |
| HNF4A | path:00982_10 | 2.52E-07 |
| SP1   | path:04512_5  | 2.72E-07 |
| SP3   | path:04110_17 | 3.14E-07 |
| TP53  | path:04110_17 | 3.28E-07 |
| SP3   | path:04510_1  | 3.35E-07 |
| IRF3  | path:04620_11 | 3.65E-07 |
| IRF3  | path:04620_2  | 3.65E-07 |
| IRF7  | path:04620_11 | 3.65E-07 |
| IRF7  | path:04620_2  | 3.65E-07 |
| E2F1  | path:05222_1  | 3.73E-07 |
| RFX2  | path:04514_1  | 3.82E-07 |

|      |               |          |
|------|---------------|----------|
| RFX2 | path:04514_3  | 3.82E-07 |
| RFX2 | path:04612_3  | 3.82E-07 |
| RFX2 | path:04672_4  | 3.82E-07 |
| RFX2 | path:04672_5  | 3.82E-07 |
| RFX2 | path:04940_1  | 3.82E-07 |
| RFX2 | path:05150_14 | 3.82E-07 |
| RFX2 | path:05310_1  | 3.82E-07 |
| RFX2 | path:05310_3  | 3.82E-07 |
| RFX2 | path:05320_1  | 3.82E-07 |
| RFX2 | path:05320_3  | 3.82E-07 |
| RFX2 | path:05320_4  | 3.82E-07 |
| RFX2 | path:05320_6  | 3.82E-07 |
| RFX2 | path:05322_5  | 3.82E-07 |
| RFX2 | path:05322_6  | 3.82E-07 |
| RFX2 | path:05330_1  | 3.82E-07 |
| RFX2 | path:05330_2  | 3.82E-07 |
| RFX2 | path:05330_4  | 3.82E-07 |
| RFX2 | path:05332_1  | 3.82E-07 |
| RFX2 | path:05416_4  | 3.82E-07 |
| RFX3 | path:05330_7  | 4.00E-07 |
| SP1  | path:04110_7  | 4.97E-07 |
| SP1  | path:05222_1  | 5.36E-07 |
| AKNA | path:04060_31 | 6.20E-07 |
| AKNA | path:04514_10 | 6.20E-07 |
| AKNA | path:04514_11 | 6.20E-07 |
| AKNA | path:04514_12 | 6.20E-07 |
| AKNA | path:04514_78 | 6.20E-07 |
| AKNA | path:04514_9  | 6.20E-07 |
| AKNA | path:04672_2  | 6.20E-07 |
| AKNA | path:05144_9  | 6.20E-07 |
| AKNA | path:05145_20 | 6.20E-07 |
| AKNA | path:05310_2  | 6.20E-07 |
| AKNA | path:05320_2  | 6.20E-07 |
| AKNA | path:05320_5  | 6.20E-07 |

|        |               |          |
|--------|---------------|----------|
| AKNA   | path:05322_7  | 6.20E-07 |
| AKNA   | path:05330_12 | 6.20E-07 |
| AKNA   | path:05330_3  | 6.20E-07 |
| AKNA   | path:05416_3  | 6.20E-07 |
| SP1    | path:04512_6  | 6.24E-07 |
| SP3    | path:04510_19 | 6.37E-07 |
| CEBPB  | path:04620_12 | 6.69E-07 |
| SP1    | path:04810_29 | 7.92E-07 |
| SP1    | path:05146_2  | 7.92E-07 |
| SP3    | path:05200_51 | 8.65E-07 |
| SP1    | path:05146_9  | 9.10E-07 |
| SP1    | path:04610_3  | 9.21E-07 |
| SP1    | path:04610_6  | 9.21E-07 |
| SP1    | path:05200_29 | 9.21E-07 |
| SP1    | path:05214_15 | 9.21E-07 |
| SP1    | path:05218_7  | 9.21E-07 |
| SP1    | path:05220_11 | 9.21E-07 |
| CEBPB  | path:04620_18 | 9.27E-07 |
| CEBPB  | path:04620_16 | 9.58E-07 |
| RFX2   | path:05330_7  | 1.00E-06 |
| NR5A1  | path:00140_8  | 1.09E-06 |
| NR5A1  | path:00140_9  | 1.09E-06 |
| SP3    | path:05146_2  | 1.13E-06 |
| NR5A1  | path:00140_16 | 1.15E-06 |
| NR5A1  | path:00140_18 | 1.15E-06 |
| SP1    | path:05146_1  | 1.23E-06 |
| NR5A1  | path:00140_10 | 1.53E-06 |
| SP1    | path:04512_12 | 1.66E-06 |
| NR5A1  | path:00140_19 | 1.72E-06 |
| NR5A1  | path:00140_7  | 1.72E-06 |
| SP3    | path:05146_1  | 1.74E-06 |
| SP1    | path:04630_3  | 1.97E-06 |
| NFE2L2 | path:00480_2  | 2.02E-06 |
| RELA   | path:04620_1  | 2.11E-06 |

|        |               |          |
|--------|---------------|----------|
| RFX1   | path:04514_1  | 2.14E-06 |
| RFX1   | path:04514_3  | 2.14E-06 |
| RFX1   | path:04612_3  | 2.14E-06 |
| RFX1   | path:04672_4  | 2.14E-06 |
| RFX1   | path:04672_5  | 2.14E-06 |
| RFX1   | path:04940_1  | 2.14E-06 |
| RFX1   | path:05150_14 | 2.14E-06 |
| RFX1   | path:05310_1  | 2.14E-06 |
| RFX1   | path:05310_3  | 2.14E-06 |
| RFX1   | path:05320_1  | 2.14E-06 |
| RFX1   | path:05320_3  | 2.14E-06 |
| RFX1   | path:05320_4  | 2.14E-06 |
| RFX1   | path:05320_6  | 2.14E-06 |
| RFX1   | path:05322_5  | 2.14E-06 |
| RFX1   | path:05322_6  | 2.14E-06 |
| RFX1   | path:05330_1  | 2.14E-06 |
| RFX1   | path:05330_2  | 2.14E-06 |
| RFX1   | path:05330_4  | 2.14E-06 |
| RFX1   | path:05332_1  | 2.14E-06 |
| RFX1   | path:05416_4  | 2.14E-06 |
| TFAP2A | path:05200_8  | 2.16E-06 |
| NR5A1  | path:00140_5  | 2.18E-06 |
| NR5A1  | path:00140_6  | 2.70E-06 |
| E2F1   | path:04110_20 | 2.73E-06 |
| E2F1   | path:04110_27 | 2.73E-06 |
| SPI1   | path:04145_6  | 3.11E-06 |
| SP1    | path:05200_53 | 4.11E-06 |
| TCF7L2 | path:05200_31 | 4.20E-06 |
| TCF7L2 | path:05210_12 | 4.20E-06 |
| TCF7L2 | path:05210_7  | 4.20E-06 |
| TCF7L2 | path:05216_4  | 4.20E-06 |
| HNF4A  | path:04610_2  | 4.35E-06 |
| HNF4A  | path:04610_3  | 4.35E-06 |
| CEBPB  | path:04620_17 | 4.38E-06 |



|        |               |          |
|--------|---------------|----------|
| CEBPB  | path:04620_22 | 4.38E-06 |
| SP3    | path:04110_20 | 4.71E-06 |
| SP3    | path:04110_27 | 4.71E-06 |
| CEBPB  | path:04620_9  | 4.77E-06 |
| SP1    | path:04512_11 | 5.55E-06 |
| SP1    | path:04610_4  | 5.55E-06 |
| RFX1   | path:05330_7  | 5.59E-06 |
| SP1    | path:04630_4  | 5.95E-06 |
| SP1    | path:04115_4  | 6.18E-06 |
| NR4A1  | path:00140_13 | 6.42E-06 |
| JUN    | path:04620_18 | 6.60E-06 |
| TFAP2A | path:05200_15 | 6.62E-06 |
| HNF4A  | path:04610_5  | 6.69E-06 |
| MYC    | path:05200_29 | 7.20E-06 |
| SP1    | path:04144_2  | 7.61E-06 |
| PAX6   | path:04510_1  | 7.62E-06 |
| PAX6   | path:04510_19 | 7.62E-06 |
| ZBTB7A | path:04110_25 | 7.64E-06 |
| SP1    | path:04512_13 | 7.86E-06 |
| ELF1   | path:04060_8  | 8.41E-06 |
| ZBTB7A | path:04110_27 | 9.07E-06 |
| SP1    | path:04512_9  | 9.36E-06 |
| TCF7L2 | path:05213_1  | 9.42E-06 |
| ELF1   | path:04664_2  | 1.05E-05 |
| E2F1   | path:05214_13 | 1.07E-05 |
| E2F1   | path:05214_21 | 1.07E-05 |
| E2F1   | path:05220_12 | 1.07E-05 |
| SP1    | path:04540_13 | 1.22E-05 |
| CEBPB  | path:04060_56 | 1.23E-05 |
| SP3    | path:05200_52 | 1.23E-05 |
| IRF3   | path:04620_12 | 1.24E-05 |
| IRF7   | path:04620_12 | 1.24E-05 |
| LEF1   | path:05200_31 | 1.30E-05 |
| LEF1   | path:05210_12 | 1.30E-05 |

|        |               |          |
|--------|---------------|----------|
| LEF1   | path:05210_7  | 1.30E-05 |
| LEF1   | path:05216_4  | 1.30E-05 |
| SP1    | path:04310_6  | 1.33E-05 |
| SP1    | path:04912_8  | 1.33E-05 |
| SP1    | path:05200_48 | 1.33E-05 |
| SP1    | path:05214_12 | 1.33E-05 |
| SP1    | path:05218_6  | 1.33E-05 |
| SP1    | path:05220_8  | 1.33E-05 |
| PAX6   | path:05414_2  | 1.40E-05 |
| TFAP2A | path:04510_18 | 1.42E-05 |
| SP1    | path:04110_22 | 1.43E-05 |
| SP1    | path:04510_20 | 1.43E-05 |
| SP1    | path:00140_10 | 1.44E-05 |
| SP1    | path:00140_3  | 1.44E-05 |
| SP1    | path:00140_4  | 1.44E-05 |
| SP1    | path:05212_13 | 1.44E-05 |
| SP1    | path:05219_4  | 1.44E-05 |
| SP1    | path:05223_3  | 1.44E-05 |
| ATF2   | path:04620_18 | 1.46E-05 |
| TP53   | path:04110_19 | 1.48E-05 |
| E2F1   | path:05200_51 | 1.56E-05 |
| E2F1   | path:05215_7  | 1.56E-05 |
| SP1    | path:04512_3  | 1.66E-05 |
| NR5A1  | path:00140_11 | 1.69E-05 |
| E2F1   | path:04110_7  | 1.74E-05 |
| SP1    | path:04310_7  | 1.77E-05 |
| SP1    | path:05414_2  | 1.77E-05 |
| SP3    | path:05146_9  | 1.78E-05 |
| TFAP2A | path:05200_11 | 1.91E-05 |
| TFAP2A | path:05200_12 | 1.91E-05 |
| TFAP2A | path:05200_4  | 1.91E-05 |
| TP53   | path:05200_48 | 1.95E-05 |
| TP53   | path:05200_8  | 1.95E-05 |
| TP53   | path:05214_12 | 1.95E-05 |

|        |               |          |
|--------|---------------|----------|
| TP53   | path:05218_6  | 1.95E-05 |
| TP53   | path:05220_8  | 1.95E-05 |
| SP1    | path:04512_10 | 2.01E-05 |
| SP1    | path:05200_3  | 2.01E-05 |
| SP1    | path:05222_4  | 2.01E-05 |
| JUN    | path:04620_17 | 2.03E-05 |
| JUN    | path:04620_22 | 2.03E-05 |
| JUN    | path:04620_9  | 2.03E-05 |
| JUN    | path:05200_29 | 2.03E-05 |
| TCF7L2 | path:05221_1  | 2.10E-05 |
| TFAP2A | path:05200_10 | 2.20E-05 |
| TFAP2A | path:05200_5  | 2.22E-05 |
| TP63   | path:04110_1  | 2.23E-05 |
| TCF7L2 | path:05200_42 | 2.26E-05 |
| HNF4A  | path:00830_2  | 2.36E-05 |
| FOXA3  | path:00982_11 | 2.48E-05 |
| FOXA3  | path:00982_3  | 2.48E-05 |
| FOXA3  | path:00982_7  | 2.48E-05 |
| FOXA3  | path:00982_8  | 2.48E-05 |
| LEF1   | path:05213_1  | 2.72E-05 |
| PAX6   | path:04510_20 | 2.77E-05 |
| SP1    | path:00140_13 | 2.77E-05 |
| SP1    | path:00140_19 | 2.77E-05 |
| SP1    | path:00140_7  | 2.77E-05 |
| IRF1   | path:04620_12 | 2.78E-05 |
| ATF2   | path:04620_17 | 3.02E-05 |
| ATF2   | path:04620_22 | 3.02E-05 |
| ATF2   | path:04620_9  | 3.02E-05 |
| SP3    | path:04110_23 | 3.02E-05 |
| SP3    | path:05214_13 | 3.02E-05 |
| SP3    | path:05220_12 | 3.02E-05 |
| SP3    | path:04110_3  | 3.13E-05 |
| SP3    | path:04110_4  | 3.13E-05 |
| SREBF1 | path:04910_5  | 3.27E-05 |

|        |               |          |
|--------|---------------|----------|
| SP3    | path:04512_12 | 3.50E-05 |
| SP3    | path:04512_3  | 3.50E-05 |
| POU2F1 | path:00830_2  | 3.54E-05 |
| TFAP2A | path:04510_17 | 3.81E-05 |
| HNFI1A | path:00140_12 | 3.95E-05 |
| SP3    | path:00140_10 | 4.16E-05 |
| SP3    | path:00140_3  | 4.16E-05 |
| SP3    | path:00140_4  | 4.16E-05 |
| SP3    | path:05219_4  | 4.16E-05 |
| PAX6   | path:04810_29 | 4.23E-05 |
| SP1    | path:04115_3  | 4.23E-05 |
| KLF4   | path:04110_17 | 4.70E-05 |
| KLF4   | path:04110_19 | 4.70E-05 |
| SP1    | path:04650_20 | 4.84E-05 |
| PAX6   | path:04512_23 | 4.96E-05 |
| PAX6   | path:04670_9  | 4.96E-05 |
| PAX6   | path:05131_5  | 4.96E-05 |
| PAX6   | path:05131_6  | 4.96E-05 |
| SP1    | path:04115_7  | 4.96E-05 |
| SP1    | path:00140_5  | 5.07E-05 |
| SP1    | path:05200_50 | 5.07E-05 |
| FOXA3  | path:00982_4  | 5.10E-05 |
| FOXA3  | path:00982_5  | 5.10E-05 |
| FOXA3  | path:00982_9  | 5.10E-05 |
| SMAD2  | path:04110_25 | 5.26E-05 |
| SMAD2  | path:04510_1  | 5.26E-05 |
| SMAD2  | path:04510_19 | 5.26E-05 |
| SMAD2  | path:04512_13 | 5.26E-05 |
| PAX6   | path:04510_4  | 5.33E-05 |
| STAT3  | path:04630_4  | 5.36E-05 |
| IRF3   | path:04060_38 | 5.44E-05 |
| IRF7   | path:04060_38 | 5.44E-05 |
| SP3    | path:04512_13 | 5.52E-05 |
| FOXA3  | path:00982_2  | 5.58E-05 |

|       |               |          |
|-------|---------------|----------|
| SP3   | path:00140_11 | 5.63E-05 |
| SP3   | path:00140_13 | 5.63E-05 |
| SP3   | path:00140_19 | 5.63E-05 |
| SP3   | path:00140_7  | 5.63E-05 |
| SP3   | path:04512_6  | 5.63E-05 |
| SP3   | path:05214_15 | 5.63E-05 |
| SP3   | path:05218_7  | 5.63E-05 |
| SP3   | path:05220_11 | 5.63E-05 |
| IRF3  | path:04650_6  | 5.75E-05 |
| IRF3  | path:05160_6  | 5.75E-05 |
| IRF7  | path:04650_6  | 5.75E-05 |
| IRF7  | path:05160_6  | 5.75E-05 |
| LEF1  | path:05221_1  | 5.77E-05 |
| NR5A1 | path:00140_22 | 5.77E-05 |
| NR5A1 | path:00140_23 | 5.77E-05 |
| NR5A1 | path:00140_24 | 5.77E-05 |
| LEF1  | path:05200_42 | 6.00E-05 |
| JUN   | path:04620_12 | 6.18E-05 |
| SP3   | path:04510_18 | 6.32E-05 |
| PAX6  | path:04512_24 | 6.38E-05 |
| PAX6  | path:04514_57 | 6.38E-05 |
| PAX6  | path:05100_3  | 6.38E-05 |
| PAX6  | path:05140_1  | 6.38E-05 |
| SMAD2 | path:04110_18 | 6.60E-05 |
| TP73  | path:04115_2  | 6.67E-05 |
| TP73  | path:04115_3  | 6.67E-05 |
| TP73  | path:04115_4  | 6.67E-05 |
| TP73  | path:04115_7  | 6.67E-05 |
| SP1   | path:04115_2  | 6.74E-05 |
| SP1   | path:04510_4  | 6.74E-05 |
| TP73  | path:04115_1  | 6.75E-05 |
| SP1   | path:05218_8  | 7.27E-05 |
| FOXA3 | path:00982_10 | 7.28E-05 |
| SP3   | path:04512_9  | 7.41E-05 |

|        |               |          |
|--------|---------------|----------|
| TP53   | path:04110_22 | 7.56E-05 |
| TP53   | path:05200_47 | 7.56E-05 |
| TP53   | path:05214_14 | 7.56E-05 |
| TP53   | path:05220_9  | 7.56E-05 |
| TP63   | path:04110_7  | 8.12E-05 |
| TP63   | path:04115_1  | 8.12E-05 |
| TP63   | path:04115_2  | 8.12E-05 |
| TP63   | path:04115_3  | 8.12E-05 |
| TP63   | path:04115_4  | 8.12E-05 |
| TP63   | path:04115_7  | 8.12E-05 |
| TP63   | path:05200_48 | 8.12E-05 |
| TP63   | path:05214_12 | 8.12E-05 |
| TP63   | path:05218_6  | 8.12E-05 |
| TP63   | path:05220_8  | 8.12E-05 |
| TFAP2A | path:04510_7  | 8.35E-05 |
| TFAP2A | path:05200_29 | 8.35E-05 |
| SP3    | path:00140_5  | 8.41E-05 |
| MYC    | path:05200_50 | 8.52E-05 |
| MYC    | path:05222_2  | 8.52E-05 |
| MYC    | path:05222_7  | 8.52E-05 |
| SP1    | path:00140_6  | 8.66E-05 |
| MYC    | path:05222_1  | 8.86E-05 |
| ENO1   | path:00140_10 | 8.93E-05 |
| ENO1   | path:00140_13 | 8.93E-05 |
| ENO1   | path:00140_14 | 8.93E-05 |
| ENO1   | path:00140_16 | 8.93E-05 |
| ENO1   | path:00140_18 | 8.93E-05 |
| ENO1   | path:00140_19 | 8.93E-05 |
| ENO1   | path:00140_20 | 8.93E-05 |
| ENO1   | path:00140_3  | 8.93E-05 |
| ENO1   | path:00140_4  | 8.93E-05 |
| ENO1   | path:00140_7  | 8.93E-05 |
| ENO1   | path:00140_8  | 8.93E-05 |
| ENO1   | path:00140_9  | 8.93E-05 |

|       |               |             |
|-------|---------------|-------------|
| NR5A1 | path:04060_21 | 8.93E-05    |
| PAX6  | path:04514_56 | 9.92E-05    |
| HNF4A | path:00120_9  | 0.000100826 |
| HNF4A | path:03320_2  | 0.000100826 |
| HNF4A | path:04610_4  | 0.000100826 |
| SP1   | path:04512_14 | 0.000101569 |
| ENO1  | path:00140_5  | 0.000103024 |
| STAT3 | path:05200_29 | 0.000108961 |
| SPI1  | path:05140_4  | 0.000110411 |
| NR5A1 | path:00140_12 | 0.000116509 |
| ENO1  | path:00140_6  | 0.000116921 |
| TP53  | path:05200_20 | 0.00011707  |
| TP53  | path:05214_13 | 0.00011707  |
| TP53  | path:05220_12 | 0.00011707  |
| LEF1  | path:04310_7  | 0.000118706 |
| NR1H2 | path:00982_4  | 0.00011908  |
| NR1H2 | path:00982_5  | 0.00011908  |
| NR1H2 | path:00982_9  | 0.00011908  |
| SMAD2 | path:04512_12 | 0.000121975 |
| NFYA  | path:04115_2  | 0.000123767 |
| SP1   | path:00140_8  | 0.000123921 |
| SP1   | path:00140_9  | 0.000123921 |
| SP1   | path:04010_5  | 0.000123921 |
| SP3   | path:00140_12 | 0.000126279 |
| SP3   | path:00140_6  | 0.000126279 |
| SP3   | path:04110_18 | 0.000128011 |
| PAX6  | path:04514_49 | 0.000131273 |
| PAX6  | path:04514_50 | 0.000131273 |
| NR2F1 | path:03320_2  | 0.000132961 |
| SP1   | path:04610_7  | 0.000133832 |
| SP1   | path:05218_5  | 0.000133832 |
| SP1   | path:05222_2  | 0.000133832 |
| RELA  | path:04060_62 | 0.000137451 |
| SP1   | path:04510_17 | 0.000141426 |

|       |               |             |
|-------|---------------|-------------|
| SP3   | path:05200_48 | 0.00015602  |
| SP3   | path:05214_12 | 0.00015602  |
| SP3   | path:05218_6  | 0.00015602  |
| SP3   | path:05220_8  | 0.00015602  |
| JUN   | path:04620_16 | 0.000158904 |
| TP63  | path:05200_47 | 0.000159403 |
| TP63  | path:05214_14 | 0.000159403 |
| TP63  | path:05220_9  | 0.000159403 |
| SMAD2 | path:04512_6  | 0.00016587  |
| SP1   | path:04512_27 | 0.00016592  |
| TP53  | path:05200_51 | 0.000172314 |
| PAX6  | path:05100_10 | 0.000173551 |
| XBP1  | path:04514_1  | 0.000178543 |
| XBP1  | path:04514_3  | 0.000178543 |
| XBP1  | path:04612_3  | 0.000178543 |
| XBP1  | path:04672_4  | 0.000178543 |
| XBP1  | path:04672_5  | 0.000178543 |
| XBP1  | path:04940_1  | 0.000178543 |
| XBP1  | path:05150_14 | 0.000178543 |
| XBP1  | path:05310_1  | 0.000178543 |
| XBP1  | path:05310_3  | 0.000178543 |
| XBP1  | path:05320_1  | 0.000178543 |
| XBP1  | path:05320_3  | 0.000178543 |
| XBP1  | path:05320_4  | 0.000178543 |
| XBP1  | path:05320_6  | 0.000178543 |
| XBP1  | path:05322_5  | 0.000178543 |
| XBP1  | path:05322_6  | 0.000178543 |
| XBP1  | path:05330_1  | 0.000178543 |
| XBP1  | path:05330_2  | 0.000178543 |
| XBP1  | path:05330_4  | 0.000178543 |
| XBP1  | path:05332_1  | 0.000178543 |
| XBP1  | path:05416_4  | 0.000178543 |
| HNF4A | path:04610_6  | 0.000179282 |
| CEBPA | path:04610_4  | 0.00018207  |



|       |               |             |
|-------|---------------|-------------|
| CEBPA | path:04610_6  | 0.00018207  |
| NR1I3 | path:00830_2  | 0.000186607 |
| FOXA3 | path:00140_11 | 0.000188543 |
| CEBPB | path:04062_2  | 0.000193217 |
| E2F1  | path:04110_1  | 0.000197534 |
| E2F1  | path:05218_8  | 0.000197534 |
| RUNX3 | path:04612_4  | 0.000198099 |
| REL   | path:04650_22 | 0.00019873  |
| REL   | path:04650_23 | 0.00019873  |
| TP53  | path:04110_23 | 0.000198814 |
| SP1   | path:04610_8  | 0.000203885 |
| SP1   | path:04620_18 | 0.000203885 |
| TP53  | path:04110_3  | 0.000210553 |
| TP53  | path:05214_10 | 0.000210553 |
| TP53  | path:04722_19 | 0.000218217 |
| PAX6  | path:04510_10 | 0.000221093 |
| PAX6  | path:04510_6  | 0.000221093 |
| PAX6  | path:04510_8  | 0.000221093 |
| SP1   | path:04630_1  | 0.000231547 |
| SP1   | path:00140_16 | 0.000245716 |
| SP1   | path:00140_18 | 0.000245716 |
| SP1   | path:04512_18 | 0.000245716 |
| SP1   | path:05140_6  | 0.000245716 |
| SP1   | path:05214_21 | 0.000245716 |
| FOXA3 | path:00982_6  | 0.000248984 |
| SPI1  | path:04670_2  | 0.000252274 |
| STAT4 | path:04630_4  | 0.000257265 |
| TP53  | path:04210_23 | 0.000275763 |
| TP53  | path:04210_24 | 0.000275763 |
| TP53  | path:05200_11 | 0.000275763 |
| TP53  | path:05200_12 | 0.000275763 |
| TP53  | path:05200_4  | 0.000275763 |
| TP53  | path:05215_11 | 0.000275763 |
| HNF4A | path:04950_4  | 0.000287791 |

|        |               |             |
|--------|---------------|-------------|
| SP1    | path:05200_4  | 0.000289957 |
| MYC    | path:04110_20 | 0.000292768 |
| MYC    | path:04110_27 | 0.000292768 |
| TXK    | path:04612_7  | 0.000297672 |
| NFYA   | path:04110_23 | 0.000299258 |
| NFYA   | path:04110_3  | 0.000299258 |
| SP3    | path:04110_26 | 0.000307175 |
| E2F1   | path:04110_22 | 0.000308684 |
| JUN    | path:04650_20 | 0.000308777 |
| SP1    | path:05219_3  | 0.000310459 |
| FOXA3  | path:00591_1  | 0.000312584 |
| TFAP2A | path:05214_10 | 0.000317116 |
| TFAP2A | path:05215_10 | 0.000317116 |
| XBP1   | path:05330_7  | 0.000327268 |
| FOXA3  | path:00140_1  | 0.000327469 |
| FOXA3  | path:00140_25 | 0.000327469 |
| FOXA3  | path:00140_26 | 0.000327469 |
| FOXA3  | path:00980_2  | 0.000327469 |
| TP53   | path:05200_10 | 0.000338058 |
| NFYA   | path:04110_17 | 0.000340548 |
| NFYA   | path:04110_7  | 0.000340548 |
| ESR1   | path:04115_1  | 0.000345486 |
| ESR1   | path:05200_29 | 0.000345486 |
| KLF5   | path:05200_31 | 0.000357162 |
| KLF5   | path:05210_12 | 0.000357162 |
| KLF5   | path:05210_7  | 0.000357162 |
| TP53   | path:05200_5  | 0.000367024 |
| STAT5A | path:04630_4  | 0.000370487 |
| STAT5B | path:04630_4  | 0.000370487 |
| ENO1   | path:00140_11 | 0.000376878 |
| MYC    | path:04110_18 | 0.00038916  |
| NR5A1  | path:00140_14 | 0.000393628 |
| ZBTB7A | path:05200_51 | 0.000396677 |
| ZBTB7A | path:05214_13 | 0.000396677 |

|        |               |             |
|--------|---------------|-------------|
| ZBTB7A | path:05214_15 | 0.000396677 |
| ZBTB7A | path:05218_7  | 0.000396677 |
| ZBTB7A | path:05219_4  | 0.000396677 |
| ZBTB7A | path:05220_11 | 0.000396677 |
| ZBTB7A | path:05220_12 | 0.000396677 |
| ATF2   | path:04620_12 | 0.000407893 |
| YY1    | path:05214_13 | 0.000410896 |
| YY1    | path:05220_12 | 0.000410896 |
| SP1    | path:05218_4  | 0.000411461 |
| SP1    | path:04520_7  | 0.000412181 |
| GLI3   | path:04340_2  | 0.000416702 |
| GLI3   | path:05200_34 | 0.000416702 |
| TP53   | path:04210_20 | 0.000421718 |
| SP3    | path:04512_27 | 0.000423815 |
| ZBTB7B | path:04512_11 | 0.000424221 |
| ZBTB7B | path:04512_13 | 0.000424221 |
| ZBTB7B | path:04512_14 | 0.000424221 |
| ZBTB7B | path:05146_9  | 0.000424221 |
| TFAP2A | path:05215_11 | 0.000436788 |
| YY1    | path:05200_51 | 0.00043761  |
| SP1    | path:00140_20 | 0.000441307 |
| SP1    | path:04010_26 | 0.000441307 |
| SP1    | path:05142_20 | 0.000441307 |
| SP1    | path:05210_10 | 0.000441307 |
| SP1    | path:05216_4  | 0.000441307 |
| NR5A2  | path:00140_11 | 0.000442761 |
| SP1    | path:04510_7  | 0.000448433 |
| TFAP2A | path:05200_21 | 0.000448647 |
| MITF   | path:00350_1  | 0.00045151  |
| YY1    | path:04110_19 | 0.000476218 |
| ZBTB7B | path:04512_10 | 0.000476318 |
| ZBTB7B | path:04512_12 | 0.000476318 |
| ZBTB7B | path:04512_27 | 0.000476318 |
| ZBTB7B | path:04512_3  | 0.000476318 |

|        |               |             |
|--------|---------------|-------------|
| ZBTB7B | path:04512_5  | 0.000476318 |
| ZBTB7B | path:05146_1  | 0.000476318 |
| ZBTB7B | path:05146_2  | 0.000476318 |
| YY1    | path:04110_17 | 0.000485911 |
| SP3    | path:04512_10 | 0.000488202 |
| FOXA3  | path:00140_12 | 0.000502586 |
| HNF4A  | path:00591_1  | 0.000515682 |
| MYC    | path:04110_23 | 0.000518594 |
| MYC    | path:04110_26 | 0.000518594 |
| MYC    | path:04110_3  | 0.000518594 |
| MYC    | path:04110_4  | 0.000518594 |
| ZBTB7B | path:04512_6  | 0.000520973 |
| ELF1   | path:04664_10 | 0.000533253 |
| ELF1   | path:04664_3  | 0.000533253 |
| ELF1   | path:04664_5  | 0.000533253 |
| ELF1   | path:04664_9  | 0.000533253 |
| NR1I3  | path:00982_4  | 0.000535628 |
| NR1I3  | path:00982_5  | 0.000535628 |
| NR1I3  | path:00982_9  | 0.000535628 |
| ZBTB7B | path:04512_9  | 0.000536621 |
| SP3    | path:04512_19 | 0.000541628 |
| SP1    | path:04512_19 | 0.000549822 |
| RELA   | path:04115_1  | 0.0005539   |
| TFAP2A | path:04144_2  | 0.00057548  |
| TFAP2A | path:04520_5  | 0.00057548  |
| TP53   | path:04510_17 | 0.000580605 |
| FOXA2  | path:04610_3  | 0.000581017 |
| FOXA2  | path:04610_4  | 0.000581017 |
| FOXA2  | path:04610_6  | 0.000581017 |
| TP73   | path:04722_19 | 0.000595015 |
| GATA4  | path:00590_1  | 0.00061049  |
| GATA4  | path:00590_2  | 0.00061049  |
| GATA4  | path:00590_3  | 0.00061049  |
| GATA4  | path:00590_4  | 0.00061049  |

|        |               |             |
|--------|---------------|-------------|
| GATA4  | path:00591_1  | 0.00061049  |
| GATA4  | path:00980_2  | 0.00061049  |
| PAX6   | path:04670_20 | 0.000614792 |
| SP3    | path:00120_2  | 0.000618445 |
| SP3    | path:00120_3  | 0.000618445 |
| SP3    | path:00140_8  | 0.000618445 |
| SP3    | path:00140_9  | 0.000618445 |
| SP3    | path:05200_47 | 0.000618445 |
| SP3    | path:05214_14 | 0.000618445 |
| SP3    | path:05220_9  | 0.000618445 |
| SMAD4  | path:04110_25 | 0.000620016 |
| IRF1   | path:04620_1  | 0.000622656 |
| POU2F1 | path:04110_18 | 0.000623378 |
| YBX1   | path:04510_16 | 0.00062354  |
| YBX1   | path:05218_2  | 0.00062354  |
| NR5A1  | path:00140_20 | 0.00062425  |
| NR5A1  | path:00140_3  | 0.00062425  |
| NR5A1  | path:00140_4  | 0.00062425  |
| THRB   | path:04080_2  | 0.000625072 |
| CREB1  | path:04620_18 | 0.000627719 |
| ZBTB7A | path:05200_52 | 0.000644363 |
| ZBTB7A | path:05222_1  | 0.000644363 |
| ZBTB7A | path:05222_2  | 0.000644363 |
| POU2F1 | path:00982_4  | 0.000646745 |
| POU2F1 | path:00982_5  | 0.000646745 |
| POU2F1 | path:00982_9  | 0.000646745 |
| POU2F1 | path:05200_51 | 0.000646745 |
| TXK    | path:04650_22 | 0.000654737 |
| TXK    | path:04650_23 | 0.000654737 |
| STAT6  | path:04630_2  | 0.000657478 |
| STAT6  | path:04630_3  | 0.000657478 |
| STAT6  | path:04630_4  | 0.000657478 |
| AR     | path:04115_1  | 0.000666989 |
| AR     | path:04115_3  | 0.000666989 |

|        |               |             |
|--------|---------------|-------------|
| POU2F1 | path:04110_17 | 0.000667343 |
| POU2F1 | path:04110_19 | 0.000667343 |
| POU2F1 | path:05200_50 | 0.000667343 |
| LEF1   | path:04310_6  | 0.000671935 |
| PAX6   | path:04670_14 | 0.00067845  |
| ELF1   | path:04650_15 | 0.000687264 |
| ELF1   | path:04664_1  | 0.000687264 |
| ELF1   | path:05310_4  | 0.000687264 |
| ELF1   | path:05310_5  | 0.000687264 |
| KLF4   | path:04110_20 | 0.000691257 |
| KLF4   | path:04110_27 | 0.000691257 |
| EGR1   | path:04510_10 | 0.00069989  |
| EGR1   | path:04510_18 | 0.00069989  |
| MYC    | path:04110_17 | 0.000714486 |
| MYC    | path:04110_7  | 0.000714486 |
| SP1    | path:04510_23 | 0.000718519 |
| SP1    | path:04722_19 | 0.000718519 |
| SP1    | path:05142_21 | 0.000718519 |
| SP1    | path:05200_31 | 0.000718519 |
| SP1    | path:05200_42 | 0.000718519 |
| SP1    | path:05210_12 | 0.000718519 |
| SP1    | path:05210_7  | 0.000718519 |
| HNF4A  | path:00980_2  | 0.000733563 |
| SMAD4  | path:05200_29 | 0.000734371 |
| SMAD4  | path:04110_18 | 0.000743893 |
| ATF2   | path:04620_16 | 0.000747082 |
| SP3    | path:04512_11 | 0.000758402 |
| SP3    | path:05218_8  | 0.000758402 |
| STAT3  | path:05142_4  | 0.000767514 |
| NFYA   | path:04115_3  | 0.000776011 |
| NFYA   | path:04115_4  | 0.000776011 |
| NFYA   | path:04115_7  | 0.000776011 |
| NR4A1  | path:00140_10 | 0.00077713  |
| NR4A1  | path:00140_14 | 0.00077713  |

|        |               |             |
|--------|---------------|-------------|
| NR4A1  | path:00140_16 | 0.00077713  |
| NR4A1  | path:00140_18 | 0.00077713  |
| NR4A1  | path:00140_20 | 0.00077713  |
| NR4A1  | path:00140_3  | 0.00077713  |
| NR4A1  | path:00140_4  | 0.00077713  |
| NR4A1  | path:00140_8  | 0.00077713  |
| NR4A1  | path:00140_9  | 0.00077713  |
| ZBTB7A | path:04350_6  | 0.000800541 |
| YBX1   | path:04510_15 | 0.000802879 |
| YBX1   | path:04510_25 | 0.000802879 |
| YBX1   | path:04510_5  | 0.000802879 |
| SP3    | path:04144_2  | 0.000814667 |
| SP3    | path:04810_29 | 0.000814667 |
| ENO1   | path:00140_22 | 0.000819573 |
| ENO1   | path:00140_23 | 0.000819573 |
| ENO1   | path:00140_24 | 0.000819573 |
| CREM   | path:05200_29 | 0.000820491 |
| ETV4   | path:05200_29 | 0.000820491 |
| NR4A1  | path:00140_19 | 0.000832486 |
| NR4A1  | path:00140_7  | 0.000832486 |
| CEBPB  | path:04062_1  | 0.000853445 |
| POU2F1 | path:00590_1  | 0.000870331 |
| POU2F1 | path:00590_2  | 0.000870331 |
| POU2F1 | path:00590_3  | 0.000870331 |
| POU2F1 | path:00590_4  | 0.000870331 |
| POU2F1 | path:05200_52 | 0.000870331 |
| POU2F1 | path:05222_1  | 0.000870331 |
| POU2F1 | path:05222_2  | 0.000870331 |
| JUN    | path:04310_7  | 0.000877028 |
| SPI1   | path:05200_43 | 0.000902646 |
| NRL    | path:04744_2  | 0.00090302  |
| SP3    | path:04512_14 | 0.000906884 |
| SMAD3  | path:04110_25 | 0.000921676 |
| SMAD3  | path:04512_13 | 0.000921676 |

|        |               |             |
|--------|---------------|-------------|
| SMAD3  | path:05200_29 | 0.000921676 |
| SP3    | path:00120_1  | 0.000926143 |
| SP3    | path:00140_16 | 0.000926143 |
| SP3    | path:00140_18 | 0.000926143 |
| SP3    | path:04512_18 | 0.000926143 |
| NR4A1  | path:00140_5  | 0.000960385 |
| SPI1   | path:04670_15 | 0.000961365 |
| TP53   | path:05200_15 | 0.000968321 |
| FOXA3  | path:00830_2  | 0.000975791 |
| ZBTB7A | path:04110_1  | 0.001010691 |
| ZBTB7A | path:05218_8  | 0.001010691 |
| SP1    | path:04060_32 | 0.001014956 |
| SP1    | path:05100_3  | 0.001014956 |
| SP1    | path:05145_21 | 0.001014956 |
| SP1    | path:05200_56 | 0.001014956 |
| KLF4   | path:04110_23 | 0.001048885 |
| KLF4   | path:04110_26 | 0.001048885 |
| KLF4   | path:04110_3  | 0.001048885 |
| KLF4   | path:04110_4  | 0.001048885 |
| SMAD3  | path:04110_18 | 0.001049896 |
| SMAD3  | path:04510_1  | 0.00105392  |
| NR4A1  | path:00140_6  | 0.001089761 |
| SP1    | path:04210_24 | 0.001107767 |
| SP1    | path:05142_10 | 0.001107767 |
| SP1    | path:05142_4  | 0.001107767 |
| TP53   | path:04510_7  | 0.001110697 |
| NFYA   | path:04115_1  | 0.001111281 |
| TFAP2A | path:05215_8  | 0.001124594 |
| HNF4A  | path:03320_1  | 0.001131883 |
| TXK    | path:04350_11 | 0.001138141 |
| RBPJ   | path:04620_10 | 0.001146301 |
| RBPJ   | path:04620_15 | 0.001146301 |
| RBPJ   | path:04620_25 | 0.001146301 |
| RBPJ   | path:04622_3  | 0.001146301 |



|        |               |             |
|--------|---------------|-------------|
| RBPJ   | path:04623_5  | 0.001146301 |
| RBPJ   | path:05120_3  | 0.001146301 |
| RBPJ   | path:05140_13 | 0.001146301 |
| RBPJ   | path:05140_9  | 0.001146301 |
| RBPJ   | path:05142_21 | 0.001146301 |
| RBPJ   | path:05145_5  | 0.001146301 |
| RBPJ   | path:05160_17 | 0.001146301 |
| RBPJ   | path:05215_12 | 0.001146301 |
| RBPJ   | path:05215_2  | 0.001146301 |
| RBPJ   | path:05220_6  | 0.001146301 |
| SP1    | path:04510_15 | 0.001164758 |
| SP1    | path:05215_10 | 0.001164758 |
| YBX1   | path:04510_17 | 0.001170159 |
| SMAD3  | path:04510_19 | 0.001170463 |
| ZBTB7A | path:04110_20 | 0.001223683 |
| ZBTB7A | path:04110_22 | 0.001223683 |
| RBPJ   | path:04062_19 | 0.001225306 |
| RBPJ   | path:04210_3  | 0.001225306 |
| RBPJ   | path:04722_24 | 0.001225306 |
| RBPJ   | path:05120_6  | 0.001225306 |
| RBPJ   | path:05131_9  | 0.001225306 |
| RBPJ   | path:05160_3  | 0.001225306 |
| ELF1   | path:04650_14 | 0.001225713 |
| GATA4  | path:00140_8  | 0.001226506 |
| GATA4  | path:00140_9  | 0.001226506 |
| GATA4  | path:00140_10 | 0.001238279 |
| GATA4  | path:00140_13 | 0.001238279 |
| GATA4  | path:00140_16 | 0.001238279 |
| GATA4  | path:00140_18 | 0.001238279 |
| GATA4  | path:00140_19 | 0.001238279 |
| GATA4  | path:00140_3  | 0.001238279 |
| GATA4  | path:00140_4  | 0.001238279 |
| GATA4  | path:00140_7  | 0.001238279 |
| GATA4  | path:00982_4  | 0.001238279 |

|        |               |             |
|--------|---------------|-------------|
| GATA4  | path:00982_5  | 0.001238279 |
| GATA4  | path:00982_9  | 0.001238279 |
| TFAP2A | path:04520_3  | 0.001262516 |
| TFAP2A | path:04520_7  | 0.001262516 |
| TFAP2A | path:04510_10 | 0.001269093 |
| TFAP2A | path:04510_8  | 0.001271633 |
| SP3    | path:04110_22 | 0.001275861 |
| TFAP2A | path:04510_6  | 0.001276164 |
| CREB1  | path:04620_17 | 0.001277819 |
| CREB1  | path:04620_22 | 0.001277819 |
| CREB1  | path:04620_9  | 0.001277819 |
| EGR1   | path:04512_3  | 0.00129686  |
| STAT1  | path:05210_10 | 0.001312831 |
| SMAD3  | path:04512_12 | 0.001326293 |
| ENO1   | path:00140_12 | 0.001347395 |
| SP3    | path:00140_20 | 0.001366718 |
| SP3    | path:04510_17 | 0.001366718 |
| SP3    | path:05212_13 | 0.001366718 |
| SP3    | path:05223_3  | 0.001366718 |
| TP53   | path:05218_8  | 0.001385048 |
| JUN    | path:04115_1  | 0.001389686 |
| SP1    | path:04630_2  | 0.001390056 |
| SP1    | path:00980_2  | 0.001393247 |
| RBPJ   | path:04621_4  | 0.001400007 |
| SREBF1 | path:04910_6  | 0.00143191  |
| SP3    | path:05414_2  | 0.00143924  |
| NFYA   | path:04110_1  | 0.00144529  |
| GATA4  | path:00140_5  | 0.001470007 |
| YBX1   | path:04510_7  | 0.001493429 |
| YBX1   | path:05218_4  | 0.001493429 |
| KLF4   | path:04110_7  | 0.001498093 |
| POU2F1 | path:04110_25 | 0.001500996 |
| STAT1  | path:04630_4  | 0.001501202 |
| RBPJ   | path:04620_18 | 0.00151031  |

|        |               |             |
|--------|---------------|-------------|
| RBPJ   | path:04660_1  | 0.00151031  |
| ZBTB7A | path:04110_18 | 0.001518502 |
| SPI1   | path:04060_41 | 0.00153244  |
| SPI1   | path:04670_14 | 0.00153244  |
| SP1    | path:00140_11 | 0.001534931 |
| RBPJ   | path:04622_5  | 0.001558335 |
| RBPJ   | path:04662_1  | 0.001558335 |
| RBPJ   | path:05160_8  | 0.001558335 |
| SP1    | path:04510_13 | 0.001603207 |
| SP1    | path:04520_5  | 0.001603207 |
| SP1    | path:05222_7  | 0.001603207 |
| VDR    | path:00982_11 | 0.001635842 |
| VDR    | path:00982_3  | 0.001635842 |
| VDR    | path:00982_7  | 0.001635842 |
| VDR    | path:00982_8  | 0.001635842 |
| MYC    | path:05200_47 | 0.00165995  |
| MYC    | path:05214_14 | 0.00165995  |
| MYC    | path:05220_9  | 0.00165995  |
| SP1    | path:00240_2  | 0.001690362 |
| TP53   | path:05219_3  | 0.001691972 |
| HNF4A  | path:00120_6  | 0.001698537 |
| HNF4A  | path:04610_8  | 0.001698537 |
| GATA4  | path:00140_6  | 0.001710596 |
| HNF4A  | path:00590_2  | 0.001722691 |
| HNF4A  | path:00590_3  | 0.001722691 |
| TP53   | path:04510_18 | 0.001774645 |
| TP53   | path:05214_11 | 0.001774645 |
| TP53   | path:05218_5  | 0.001774645 |
| RELA   | path:04110_19 | 0.001781655 |
| RELA   | path:04650_23 | 0.001781655 |
| HNF4A  | path:00590_1  | 0.001808381 |
| TCF7L2 | path:05210_10 | 0.001830462 |
| SMAD3  | path:04512_6  | 0.001837367 |
| GATA6  | path:00590_1  | 0.00185453  |

|        |               |             |
|--------|---------------|-------------|
| GATA6  | path:00590_2  | 0.00185453  |
| GATA6  | path:00590_3  | 0.00185453  |
| GATA6  | path:00590_4  | 0.00185453  |
| GATA6  | path:00591_1  | 0.00185453  |
| RELA   | path:04110_17 | 0.001869278 |
| RELA   | path:04110_7  | 0.001869278 |
| SP1    | path:00140_1  | 0.001893526 |
| SP1    | path:00140_25 | 0.001893526 |
| SP1    | path:04620_9  | 0.001893526 |
| HNF4A  | path:00590_4  | 0.001898001 |
| RBPJ   | path:05131_12 | 0.001907232 |
| RBPJ   | path:05222_10 | 0.001907232 |
| IRF1   | path:04620_13 | 0.00193948  |
| IRF1   | path:04620_14 | 0.00193948  |
| TP53   | path:04110_20 | 0.001943417 |
| TP53   | path:04110_27 | 0.001943417 |
| ZBTB7A | path:04110_23 | 0.001957069 |
| ZBTB7A | path:04110_26 | 0.001957069 |
| ZBTB7A | path:04110_3  | 0.001957069 |
| ZBTB7A | path:04110_4  | 0.001957069 |
| GATA4  | path:00982_10 | 0.001958811 |
| RELA   | path:04650_22 | 0.00197363  |
| MYC    | path:05214_13 | 0.001974254 |
| MYC    | path:05214_21 | 0.001974254 |
| MYC    | path:05220_12 | 0.001974254 |
| IRF1   | path:04620_18 | 0.002013452 |
| MYC    | path:05200_51 | 0.002023761 |
| MYC    | path:05210_10 | 0.002023761 |
| MYC    | path:05212_13 | 0.002023761 |
| MYC    | path:05216_4  | 0.002023761 |
| MYC    | path:05219_4  | 0.002023761 |
| MYC    | path:05223_3  | 0.002023761 |
| MYC    | path:05200_31 | 0.002048915 |
| MYC    | path:05210_12 | 0.002048915 |

|        |               |             |
|--------|---------------|-------------|
| MYC    | path:05210_7  | 0.002048915 |
| MYC    | path:05214_15 | 0.002048915 |
| MYC    | path:05218_3  | 0.002048915 |
| MYC    | path:05218_7  | 0.002048915 |
| MYC    | path:05220_11 | 0.002048915 |
| YBX1   | path:04510_18 | 0.002082955 |
| RBPJ   | path:04920_11 | 0.002086483 |
| STAT1  | path:04620_16 | 0.002113614 |
| STAT1  | path:04620_18 | 0.002113614 |
| IRF1   | path:04620_16 | 0.002131661 |
| NFYA   | path:04110_22 | 0.002132484 |
| TCF7L2 | path:05215_4  | 0.002138846 |
| SP1    | path:04060_22 | 0.002149604 |
| SP1    | path:04512_20 | 0.002149604 |
| SP1    | path:05146_5  | 0.002149604 |
| SP1    | path:05220_5  | 0.002149604 |
| PAX6   | path:04670_2  | 0.002170272 |
| SP1    | path:00982_10 | 0.002175912 |
| SP1    | path:04210_20 | 0.002175912 |
| SP1    | path:04510_24 | 0.002175912 |
| RBPJ   | path:05131_10 | 0.002195318 |
| RBPJ   | path:05222_9  | 0.002195318 |
| NR5A2  | path:00140_12 | 0.002212517 |
| SP3    | path:04115_4  | 0.002218693 |
| NR5A1  | path:04350_13 | 0.002225649 |
| ZBTB7A | path:04110_19 | 0.002271569 |
| ATF2   | path:05200_29 | 0.002319558 |
| RBPJ   | path:04920_1  | 0.002376334 |
| TFAP2A | path:04520_2  | 0.002407854 |
| TFAP2A | path:05214_11 | 0.002407854 |
| TFAP2A | path:05219_2  | 0.002407854 |
| TCF7L2 | path:05200_50 | 0.002450012 |
| ZBTB7A | path:04110_17 | 0.002452708 |
| TP53   | path:04012_12 | 0.002466645 |

|        |               |             |
|--------|---------------|-------------|
| TP53   | path:04510_16 | 0.002466645 |
| MYC    | path:05200_21 | 0.002484447 |
| SP1    | path:04510_25 | 0.0024986   |
| SP1    | path:04510_5  | 0.0024986   |
| STAT5B | path:05200_47 | 0.002527186 |
| STAT5B | path:05200_51 | 0.002527186 |
| STAT5B | path:05214_13 | 0.002527186 |
| STAT5B | path:05214_14 | 0.002527186 |
| STAT5B | path:05214_15 | 0.002527186 |
| STAT5B | path:05218_7  | 0.002527186 |
| STAT5B | path:05219_4  | 0.002527186 |
| STAT5B | path:05220_11 | 0.002527186 |
| STAT5B | path:05220_12 | 0.002527186 |
| STAT5B | path:05220_9  | 0.002527186 |
| E2F1   | path:05200_54 | 0.002554435 |
| RBPJ   | path:04722_13 | 0.002559734 |
| RBPJ   | path:04620_9  | 0.00259278  |
| RBPJ   | path:05142_8  | 0.00259278  |
| RBPJ   | path:05200_18 | 0.00259278  |
| SP3    | path:04060_43 | 0.002641876 |
| SP3    | path:05144_3  | 0.002641876 |
| LEF1   | path:04916_3  | 0.002645905 |
| LEF1   | path:05210_10 | 0.002645905 |
| JUN    | path:04210_24 | 0.002648312 |
| AR     | path:04110_18 | 0.002649237 |
| TFAP2A | path:05212_11 | 0.002699451 |
| JUNB   | path:04350_10 | 0.002723194 |
| JUNB   | path:04350_12 | 0.002723194 |
| SMAD2  | path:04510_10 | 0.002748036 |
| SMAD2  | path:04510_6  | 0.002748036 |
| SMAD2  | path:04510_8  | 0.002748036 |
| TP53   | path:05218_2  | 0.002754132 |
| TP53   | path:04912_8  | 0.002756828 |
| TCF7L2 | path:05222_7  | 0.00276327  |

|        |               |             |
|--------|---------------|-------------|
| FOSL1  | path:05200_29 | 0.002765029 |
| SP1    | path:04510_16 | 0.002771235 |
| TP63   | path:05200_19 | 0.002783081 |
| TP63   | path:05200_20 | 0.002783081 |
| TP63   | path:05215_3  | 0.002837304 |
| ZBTB7B | path:04510_1  | 0.002839716 |
| ZBTB7B | path:04510_10 | 0.002839716 |
| ZBTB7B | path:04510_19 | 0.002839716 |
| ZBTB7B | path:04510_6  | 0.002839716 |
| ZBTB7B | path:04510_8  | 0.002839716 |
| KLF4   | path:05200_47 | 0.002858346 |
| KLF4   | path:05214_14 | 0.002858346 |
| KLF4   | path:05220_9  | 0.002858346 |
| SP3    | path:04510_7  | 0.002877506 |
| NR5A2  | path:00140_8  | 0.002898659 |
| NR5A2  | path:00140_9  | 0.002898659 |
| GLI1   | path:04340_2  | 0.002914772 |
| GLI1   | path:05200_34 | 0.002914772 |
| MYC    | path:05200_53 | 0.002948165 |
| ESR1   | path:04115_3  | 0.002948202 |
| ESR1   | path:04115_4  | 0.002948202 |
| ESR1   | path:04115_7  | 0.002948202 |
| ESR1   | path:04610_8  | 0.002948202 |
| JUN    | path:04610_7  | 0.002952732 |
| JUN    | path:04940_4  | 0.002952732 |
| JUN    | path:05120_6  | 0.002952732 |
| JUN    | path:05320_9  | 0.002952732 |
| JUN    | path:05330_5  | 0.002952732 |
| JUN    | path:05332_2  | 0.002952732 |
| JUN    | path:05332_5  | 0.002952732 |
| GATA2  | path:04060_47 | 0.002976989 |
| ESR1   | path:04115_2  | 0.002979325 |
| TP53   | path:05200_19 | 0.002997803 |
| SRF    | path:05410_2  | 0.003033557 |

|        |               |             |
|--------|---------------|-------------|
| SRF    | path:05414_3  | 0.003033557 |
| SRF    | path:05416_1  | 0.003033557 |
| SMAD4  | path:04115_2  | 0.003046128 |
| SMAD4  | path:04115_3  | 0.003046128 |
| SMAD4  | path:04115_4  | 0.003046128 |
| SMAD4  | path:04115_7  | 0.003046128 |
| ATF2   | path:04110_18 | 0.003077219 |
| TCF7L2 | path:05222_2  | 0.003078131 |
| NR5A2  | path:00140_18 | 0.003089823 |
| NR5A2  | path:00140_3  | 0.003089823 |
| NR5A2  | path:00140_4  | 0.003089823 |
| TP63   | path:05200_17 | 0.003115907 |
| LEF1   | path:05215_4  | 0.003117148 |
| NFE2L2 | path:00480_1  | 0.003129559 |
| NFE2L2 | path:00480_3  | 0.003129559 |
| NFE2L2 | path:00480_4  | 0.003129559 |
| NFE2L2 | path:00480_5  | 0.003129559 |
| NFE2L2 | path:00480_6  | 0.003129559 |
| YY1    | path:05218_8  | 0.003139302 |
| EGR1   | path:04510_6  | 0.003153788 |
| EGR1   | path:04510_8  | 0.003153788 |
| EGR1   | path:04540_13 | 0.003153788 |
| EGR1   | path:05146_9  | 0.003153788 |
| EGR1   | path:05218_4  | 0.003153788 |
| POU2F1 | path:04110_20 | 0.0031585   |
| POU2F1 | path:04110_27 | 0.0031585   |
| FOS    | path:04610_7  | 0.003173805 |
| FOS    | path:04620_18 | 0.003173805 |
| GLI3   | path:05200_57 | 0.003234702 |
| GLI3   | path:05217_2  | 0.003234702 |
| TP53   | path:05215_3  | 0.00331496  |
| TFAP2A | path:04510_16 | 0.003332624 |
| TFAP2A | path:05212_12 | 0.003332624 |
| VDR    | path:00982_4  | 0.003361044 |



|        |               |             |
|--------|---------------|-------------|
| VDR    | path:00982_5  | 0.003361044 |
| VDR    | path:00982_9  | 0.003361044 |
| KLF4   | path:04115_1  | 0.003364391 |
| KLF4   | path:05214_13 | 0.003364391 |
| KLF4   | path:05220_12 | 0.003364391 |
| SMAD4  | path:04115_1  | 0.003366083 |
| SP1    | path:00240_17 | 0.003391309 |
| TCF7L2 | path:05222_1  | 0.003394233 |
| MYC    | path:05213_1  | 0.003437632 |
| POU2F1 | path:04664_5  | 0.003467546 |
| NR5A2  | path:00140_7  | 0.003474881 |
| SPI1   | path:04514_62 | 0.003570772 |
| SPI1   | path:04670_10 | 0.003570772 |
| AR     | path:04110_23 | 0.003572289 |
| KLF4   | path:05200_31 | 0.003572583 |
| KLF4   | path:05200_51 | 0.003572583 |
| KLF4   | path:05210_12 | 0.003572583 |
| KLF4   | path:05210_7  | 0.003572583 |
| KLF4   | path:05214_15 | 0.003572583 |
| KLF4   | path:05218_7  | 0.003572583 |
| KLF4   | path:05219_4  | 0.003572583 |
| KLF4   | path:05220_11 | 0.003572583 |
| TP53   | path:05214_1  | 0.003580594 |
| TP53   | path:05214_4  | 0.003580594 |
| LEF1   | path:05200_50 | 0.003595279 |
| SP3    | path:05200_53 | 0.003634657 |
| VDR    | path:00982_2  | 0.003675018 |
| SMAD2  | path:05146_9  | 0.003683338 |
| YY1    | path:04110_20 | 0.003725909 |
| YY1    | path:04110_27 | 0.003725909 |
| YY1    | path:05219_3  | 0.003725909 |
| SRF    | path:05020_9  | 0.00379009  |
| NFYA   | path:04110_12 | 0.003794515 |
| SPI1   | path:04650_13 | 0.003805584 |

|        |               |             |
|--------|---------------|-------------|
| HNH4A  | path:00120_19 | 0.003812707 |
| HNH4A  | path:00120_7  | 0.003812707 |
| STAT1  | path:04620_17 | 0.003819783 |
| STAT1  | path:04620_22 | 0.003819783 |
| STAT1  | path:04620_9  | 0.003819783 |
| STAT1  | path:05200_29 | 0.003819783 |
| TFAP2A | path:04080_7  | 0.003857334 |
| TFAP2A | path:04912_8  | 0.003857334 |
| NR5A2  | path:00140_5  | 0.00385968  |
| SP1    | path:00120_2  | 0.003885876 |
| SP1    | path:00120_3  | 0.003885876 |
| SP1    | path:00140_14 | 0.003885876 |
| SP1    | path:05142_17 | 0.003885876 |
| SP1    | path:05142_18 | 0.003885876 |
| RBPJ   | path:05215_3  | 0.00389941  |
| TP53   | path:05200_17 | 0.00392722  |
| SP1    | path:04010_10 | 0.003931316 |
| SP1    | path:05142_11 | 0.003931316 |
| SP1    | path:05200_19 | 0.003935354 |
| SP1    | path:05200_20 | 0.003935354 |
| MYC    | path:05200_52 | 0.003950679 |
| GLI3   | path:05217_1  | 0.003961103 |
| NFATC1 | path:04060_32 | 0.003964221 |
| NFATC1 | path:04060_33 | 0.003964221 |
| NFATC1 | path:04650_20 | 0.003964221 |
| GATA3  | path:04612_4  | 0.003994597 |
| STAT6  | path:00590_4  | 0.003994719 |
| TFAP2C | path:04912_8  | 0.00404499  |
| TFAP2C | path:05219_2  | 0.00404499  |
| TFAP2A | path:05214_1  | 0.004058678 |
| TFAP2A | path:05214_17 | 0.004058678 |
| TFAP2A | path:05214_2  | 0.004058678 |
| TFAP2A | path:05214_3  | 0.004058678 |
| TFAP2A | path:05214_4  | 0.004058678 |

|        |               |             |
|--------|---------------|-------------|
| TFAP2A | path:05214_5  | 0.004058678 |
| TFAP2A | path:05214_6  | 0.004058678 |
| TFAP2A | path:05214_8  | 0.004058678 |
| SP3    | path:04115_1  | 0.00406173  |
| LEF1   | path:05222_7  | 0.004078733 |
| ATF2   | path:04110_23 | 0.004084659 |
| ATF2   | path:04110_26 | 0.004084659 |
| ATF2   | path:04110_3  | 0.004084659 |
| ATF2   | path:04110_4  | 0.004084659 |
| TP63   | path:05215_11 | 0.004120782 |
| CREB1  | path:04620_12 | 0.004131401 |
| CREB1  | path:04620_16 | 0.004131401 |
| CREB1  | path:04672_4  | 0.004131401 |
| CREB1  | path:04672_5  | 0.004131401 |
| CREB1  | path:04940_1  | 0.004131401 |
| CREB1  | path:05310_1  | 0.004131401 |
| CREB1  | path:05310_3  | 0.004131401 |
| CREB1  | path:05320_1  | 0.004131401 |
| CREB1  | path:05320_3  | 0.004131401 |
| CREB1  | path:05320_4  | 0.004131401 |
| CREB1  | path:05320_6  | 0.004131401 |
| CREB1  | path:05322_5  | 0.004131401 |
| CREB1  | path:05322_6  | 0.004131401 |
| CREB1  | path:05330_1  | 0.004131401 |
| CREB1  | path:05330_2  | 0.004131401 |
| CREB1  | path:05330_4  | 0.004131401 |
| CREB1  | path:05332_1  | 0.004131401 |
| CREB1  | path:05416_4  | 0.004131401 |
| REL    | path:04060_8  | 0.004162941 |
| PAX6   | path:04512_9  | 0.004167242 |
| CEBPA  | path:04060_54 | 0.0042174   |
| NR5A2  | path:00140_6  | 0.004244219 |
| CREB1  | path:04514_1  | 0.004288489 |
| CREB1  | path:04514_3  | 0.004288489 |

|       |               |             |
|-------|---------------|-------------|
| CREB1 | path:04612_3  | 0.004288489 |
| CREB1 | path:05150_14 | 0.004288489 |
| TP53  | path:04110_8  | 0.004291125 |
| NR1H2 | path:00830_2  | 0.004391058 |
| NFIC  | path:00591_1  | 0.004396514 |
| NFIC  | path:00982_7  | 0.004396514 |
| NFIC  | path:00982_8  | 0.004396514 |
| NFIC  | path:04080_7  | 0.004396514 |
| NFIC  | path:05200_48 | 0.004396514 |
| NFIC  | path:05214_12 | 0.004396514 |
| NFIC  | path:05218_5  | 0.004396514 |
| NFIC  | path:05218_6  | 0.004396514 |
| NFIC  | path:05220_8  | 0.004396514 |
| TP53  | path:04110_4  | 0.004511216 |
| TP53  | path:04510_15 | 0.004511216 |
| TP53  | path:05215_10 | 0.004511216 |
| SRF   | path:05020_8  | 0.004545882 |
| NFYA  | path:04110_26 | 0.004551637 |
| NFYA  | path:04110_8  | 0.004551637 |
| LEF1  | path:05222_2  | 0.004566365 |
| SP3   | path:00982_10 | 0.004572948 |
| SP3   | path:04510_20 | 0.004572948 |
| SP3   | path:04610_7  | 0.004572948 |
| GLI1  | path:04510_11 | 0.004577555 |
| ATF2  | path:04110_19 | 0.004580141 |
| ATF2  | path:04612_7  | 0.004580141 |
| ATF2  | path:04650_20 | 0.004580141 |
| ATF2  | path:05020_9  | 0.004580141 |
| E2F1  | path:05014_4  | 0.004589831 |
| IRF1  | path:04620_17 | 0.004615096 |
| IRF1  | path:04620_22 | 0.004615096 |
| IRF1  | path:04620_9  | 0.004615096 |
| IRF1  | path:05160_6  | 0.004615096 |
| ATF2  | path:04110_17 | 0.004619377 |

|        |               |             |
|--------|---------------|-------------|
| HMGA1  | path:04060_8  | 0.004640977 |
| SMAD4  | path:05210_10 | 0.004709635 |
| NFYA   | path:04110_4  | 0.004713566 |
| VDR    | path:00982_10 | 0.004788204 |
| JUN    | path:04310_6  | 0.004858763 |
| PAX6   | path:04510_17 | 0.004905129 |
| E2F1   | path:04115_1  | 0.00499983  |
| IRF5   | path:04060_38 | 0.005011517 |
| IRF5   | path:04620_11 | 0.005011517 |
| IRF5   | path:04620_2  | 0.005011517 |
| IRF5   | path:04650_6  | 0.005011517 |
| IRF5   | path:05160_6  | 0.005011517 |
| STAT5B | path:05200_52 | 0.005012521 |
| LEF1   | path:05222_1  | 0.005057313 |
| IRF1   | path:04620_11 | 0.005102853 |
| IRF1   | path:04620_2  | 0.005102853 |
| SP1    | path:00330_9  | 0.005126386 |
| SP1    | path:04520_3  | 0.005126386 |
| IRF3   | path:04620_14 | 0.005131788 |
| IRF7   | path:04620_14 | 0.005131788 |
| STAT1  | path:04110_18 | 0.00514314  |
| YY1    | path:05200_48 | 0.005151692 |
| YY1    | path:05214_12 | 0.005151692 |
| YY1    | path:05218_6  | 0.005151692 |
| YY1    | path:05220_8  | 0.005151692 |
| REL    | path:04612_7  | 0.005200652 |
| KLF4   | path:05200_53 | 0.005224296 |
| IRF3   | path:04620_18 | 0.005305274 |
| IRF7   | path:04620_18 | 0.005305274 |
| GATA6  | path:00982_4  | 0.005342537 |
| GATA6  | path:00982_5  | 0.005342537 |
| GATA6  | path:00982_9  | 0.005342537 |
| SPI1   | path:04145_2  | 0.005348786 |
| SPI1   | path:05150_17 | 0.005348786 |

|        |               |             |
|--------|---------------|-------------|
| GLI3   | path:04340_1  | 0.005356158 |
| NFYA   | path:04110_11 | 0.005383343 |
| ESR1   | path:00830_2  | 0.005413618 |
| TFAP2A | path:04510_15 | 0.005458314 |
| IRF3   | path:04620_16 | 0.005500251 |
| IRF7   | path:04620_16 | 0.005500251 |
| SP1    | path:00240_16 | 0.005536058 |
| SP1    | path:00330_1  | 0.005536058 |
| SP1    | path:05214_2  | 0.005536058 |
| SP1    | path:05214_5  | 0.005536058 |
| LEF1   | path:04916_11 | 0.00555092  |
| NFYA   | path:04110_19 | 0.005565492 |
| YBX1   | path:04510_10 | 0.005634473 |
| YBX1   | path:04510_6  | 0.005634473 |
| YBX1   | path:04510_8  | 0.005634473 |
| YBX1   | path:04520_3  | 0.005634473 |
| YBX1   | path:04520_5  | 0.005634473 |
| YBX1   | path:04520_7  | 0.005634473 |
| YBX1   | path:05100_15 | 0.005634473 |
| YBX1   | path:05100_2  | 0.005634473 |
| YBX1   | path:05200_9  | 0.005634473 |
| YBX1   | path:05211_1  | 0.005634473 |
| YBX1   | path:05211_2  | 0.005634473 |
| YBX1   | path:05211_7  | 0.005634473 |
| YBX1   | path:05211_8  | 0.005634473 |
| YBX1   | path:05213_6  | 0.005634473 |
| YBX1   | path:05223_5  | 0.005634473 |
| YBX1   | path:05223_7  | 0.005634473 |
| SMAD2  | path:04512_11 | 0.005671238 |
| SP3    | path:00140_26 | 0.005691454 |
| SP3    | path:04610_8  | 0.005691454 |
| SP3    | path:05222_1  | 0.005691454 |
| FOS    | path:04115_1  | 0.005719136 |
| TFAP2A | path:04020_2  | 0.005723968 |

|       |               |             |
|-------|---------------|-------------|
| ATF2  | path:00140_8  | 0.005778895 |
| ATF2  | path:00140_9  | 0.005778895 |
| AR    | path:04115_2  | 0.005794552 |
| AR    | path:04115_4  | 0.005794552 |
| AR    | path:04115_7  | 0.005794552 |
| AR    | path:05200_16 | 0.005794552 |
| AR    | path:05200_47 | 0.005794552 |
| AR    | path:05214_13 | 0.005794552 |
| AR    | path:05214_14 | 0.005794552 |
| AR    | path:05220_12 | 0.005794552 |
| AR    | path:05220_9  | 0.005794552 |
| SMAD2 | path:04512_14 | 0.005849438 |
| MYC   | path:05221_1  | 0.005908255 |
| YY1   | path:04110_23 | 0.005922984 |
| NFIC  | path:00982_11 | 0.005988829 |
| NFIC  | path:00982_3  | 0.005988829 |
| AR    | path:05200_51 | 0.006067474 |
| AR    | path:05216_4  | 0.006067474 |
| AR    | path:05219_4  | 0.006067474 |
| SP1   | path:00120_1  | 0.006087664 |
| SP1   | path:00140_12 | 0.006087664 |
| SP1   | path:05014_3  | 0.006087664 |
| SP1   | path:05145_19 | 0.006087664 |
| SP1   | path:05145_8  | 0.006087664 |
| STAT1 | path:04145_5  | 0.006088364 |
| STAT1 | path:04630_3  | 0.006088364 |
| YBX1  | path:05212_1  | 0.00609256  |
| SP1   | path:00350_2  | 0.006192277 |
| SP1   | path:00350_3  | 0.006192277 |
| SP1   | path:04110_25 | 0.006192277 |
| SP1   | path:05221_1  | 0.006192277 |
| SP3   | path:00140_1  | 0.006217062 |
| SP3   | path:00140_25 | 0.006217062 |
| AR    | path:05214_15 | 0.006236059 |

|        |               |             |
|--------|---------------|-------------|
| AR     | path:05215_1  | 0.006236059 |
| AR     | path:05218_7  | 0.006236059 |
| AR     | path:05220_11 | 0.006236059 |
| FOS    | path:04620_17 | 0.006237239 |
| FOS    | path:04620_22 | 0.006237239 |
| FOS    | path:04620_9  | 0.006237239 |
| NR1H3  | path:00980_1  | 0.006275482 |
| FOS    | path:04310_7  | 0.006308233 |
| ELF1   | path:04650_1  | 0.006320724 |
| ELF1   | path:05142_21 | 0.006320724 |
| MYC    | path:05200_42 | 0.006520738 |
| ATF2   | path:00140_18 | 0.006675857 |
| ATF2   | path:05214_13 | 0.006675857 |
| ATF2   | path:05214_21 | 0.006675857 |
| ATF2   | path:05220_12 | 0.006675857 |
| TCF7   | path:04660_20 | 0.00669167  |
| PAX6   | path:04510_7  | 0.006713786 |
| SP3    | path:05219_3  | 0.00677863  |
| IRF1   | path:04060_51 | 0.00677924  |
| SMAD4  | path:05210_9  | 0.006805486 |
| E2F1   | path:04110_16 | 0.006872543 |
| POU2F1 | path:00591_1  | 0.006943045 |
| TP53   | path:04510_25 | 0.006951959 |
| TP53   | path:04510_5  | 0.006951959 |
| YBX1   | path:04012_5  | 0.007005212 |
| YBX1   | path:04520_2  | 0.007005212 |
| YBX1   | path:05212_11 | 0.007005212 |
| YBX1   | path:05214_11 | 0.007005212 |
| YBX1   | path:05223_6  | 0.007005212 |
| EGR1   | path:05212_11 | 0.007008495 |
| NFIC   | path:05200_47 | 0.007050709 |
| NFIC   | path:05214_14 | 0.007050709 |
| NFIC   | path:05220_9  | 0.007050709 |
| KLF4   | path:05200_52 | 0.007103944 |



|       |               |             |
|-------|---------------|-------------|
| SMAD3 | path:05210_10 | 0.007105406 |
| KLF4  | path:04512_4  | 0.007140402 |
| KLF4  | path:04512_7  | 0.007140402 |
| KLF4  | path:04512_8  | 0.007140402 |
| KLF4  | path:05145_14 | 0.007140402 |
| MYC   | path:05218_8  | 0.007148499 |
| IRF1  | path:04670_2  | 0.00717245  |
| HNF4A | path:00120_15 | 0.00730316  |
| ATF2  | path:05200_51 | 0.007303382 |
| ATF2  | path:05210_10 | 0.007303382 |
| ATF2  | path:05212_13 | 0.007303382 |
| ATF2  | path:05219_4  | 0.007303382 |
| ATF2  | path:05223_3  | 0.007303382 |
| SPI1  | path:04650_12 | 0.007340609 |
| STAT3 | path:04060_3  | 0.007358355 |
| YY1   | path:04650_20 | 0.007430866 |
| SP1   | path:04060_47 | 0.007433507 |
| SP1   | path:04940_4  | 0.007433507 |
| SP1   | path:05016_8  | 0.007433507 |
| SP1   | path:05320_9  | 0.007433507 |
| SP1   | path:05330_5  | 0.007433507 |
| SP1   | path:05332_2  | 0.007433507 |
| SP1   | path:05332_5  | 0.007433507 |
| TP53  | path:04010_21 | 0.007443002 |
| TP53  | path:05160_12 | 0.007459365 |
| TP53  | path:05213_2  | 0.007459365 |
| JUN   | path:04512_23 | 0.007569048 |
| JUN   | path:05131_6  | 0.007569048 |
| YY1   | path:00140_14 | 0.00758906  |
| YY1   | path:00140_8  | 0.00758906  |
| YY1   | path:00140_9  | 0.00758906  |
| YY1   | path:04110_7  | 0.00758906  |
| YY1   | path:05200_47 | 0.00758906  |
| YY1   | path:05214_14 | 0.00758906  |

|        |               |             |
|--------|---------------|-------------|
| YY1    | path:05220_9  | 0.00758906  |
| SPI1   | path:04514_55 | 0.007630608 |
| JUN    | path:04115_3  | 0.007635426 |
| JUN    | path:04115_4  | 0.007635426 |
| SP3    | path:04110_7  | 0.007662288 |
| KLF4   | path:04512_1  | 0.007702669 |
| KLF4   | path:04512_2  | 0.007702669 |
| TP53   | path:04010_15 | 0.007702858 |
| TFAP2A | path:04510_25 | 0.007739985 |
| TFAP2A | path:04510_5  | 0.007739985 |
| TFAP2A | path:05214_16 | 0.007739985 |
| TFAP2A | path:05214_7  | 0.007739985 |
| LEF1   | path:04916_8  | 0.007825657 |
| NFIC   | path:00982_4  | 0.00787147  |
| NFIC   | path:00982_5  | 0.00787147  |
| NFIC   | path:00982_9  | 0.00787147  |
| NFIC   | path:04010_30 | 0.00787147  |
| NFIC   | path:04010_31 | 0.00787147  |
| NFIC   | path:04115_2  | 0.00787147  |
| NFIC   | path:04115_3  | 0.00787147  |
| NFIC   | path:04115_4  | 0.00787147  |
| NFIC   | path:04115_7  | 0.00787147  |
| NFIC   | path:04660_8  | 0.00787147  |
| NFIC   | path:04662_6  | 0.00787147  |
| NFIC   | path:04722_19 | 0.00787147  |
| NFIC   | path:05160_15 | 0.00787147  |
| NFIC   | path:05200_51 | 0.00787147  |
| NFIC   | path:05214_13 | 0.00787147  |
| NFIC   | path:05220_12 | 0.00787147  |
| POU2F1 | path:04664_2  | 0.007941331 |
| STAT3  | path:04630_2  | 0.00794491  |
| STAT3  | path:04630_3  | 0.00794491  |
| JUN    | path:04115_7  | 0.007953336 |
| NFIC   | path:04115_1  | 0.008000492 |

|        |               |             |
|--------|---------------|-------------|
| E2F1   | path:04110_15 | 0.008121608 |
| YBX1   | path:05212_12 | 0.008169375 |
| ATF2   | path:00140_7  | 0.008207011 |
| ATF2   | path:05214_15 | 0.008207011 |
| ATF2   | path:05218_7  | 0.008207011 |
| ATF2   | path:05220_11 | 0.008207011 |
| EGR1   | path:05212_12 | 0.008365691 |
| STAT3  | path:04060_8  | 0.008398489 |
| SPI1   | path:04650_10 | 0.008430928 |
| HNF1A  | path:00120_5  | 0.008512637 |
| HNF1A  | path:00140_1  | 0.008512637 |
| HNF1A  | path:00140_22 | 0.008512637 |
| HNF1A  | path:00140_23 | 0.008512637 |
| HNF1A  | path:00140_24 | 0.008512637 |
| HNF1A  | path:00140_25 | 0.008512637 |
| HNF1A  | path:00140_26 | 0.008512637 |
| HNF1A  | path:00982_6  | 0.008512637 |
| HNF1A  | path:04610_6  | 0.008512637 |
| TCF7L2 | path:05200_29 | 0.008546233 |
| SP1    | path:04512_22 | 0.008608739 |
| SP1    | path:04650_7  | 0.008608739 |
| SP1    | path:05014_4  | 0.008608739 |
| SP1    | path:05140_10 | 0.008608739 |
| SP1    | path:05200_38 | 0.008608739 |
| SP1    | path:05212_14 | 0.008608739 |
| SP1    | path:05215_7  | 0.008608739 |
| YBX1   | path:04910_2  | 0.008638548 |
| POU2F1 | path:00980_2  | 0.008647196 |
| MYC    | path:05218_5  | 0.008651174 |
| GATA6  | path:00982_10 | 0.008695178 |
| PAX6   | path:04510_18 | 0.008727391 |
| VDR    | path:00140_11 | 0.008771608 |
| VDR    | path:00591_1  | 0.008771608 |
| VDR    | path:00982_6  | 0.008771608 |

|        |               |             |
|--------|---------------|-------------|
| VDR    | path:04012_1  | 0.008771608 |
| VDR    | path:04012_11 | 0.008771608 |
| VDR    | path:04012_12 | 0.008771608 |
| VDR    | path:04012_4  | 0.008771608 |
| VDR    | path:04012_7  | 0.008771608 |
| VDR    | path:05200_9  | 0.008771608 |
| VDR    | path:05214_1  | 0.008771608 |
| VDR    | path:05214_17 | 0.008771608 |
| VDR    | path:05214_2  | 0.008771608 |
| VDR    | path:05214_3  | 0.008771608 |
| VDR    | path:05214_4  | 0.008771608 |
| VDR    | path:05214_5  | 0.008771608 |
| VDR    | path:05214_6  | 0.008771608 |
| VDR    | path:05214_8  | 0.008771608 |
| VDR    | path:05218_2  | 0.008771608 |
| VDR    | path:05223_6  | 0.008771608 |
| YBX1   | path:05214_1  | 0.008831833 |
| YBX1   | path:05214_17 | 0.008831833 |
| YBX1   | path:05214_2  | 0.008831833 |
| YBX1   | path:05214_3  | 0.008831833 |
| YBX1   | path:05214_4  | 0.008831833 |
| YBX1   | path:05214_5  | 0.008831833 |
| YBX1   | path:05214_6  | 0.008831833 |
| YBX1   | path:05214_8  | 0.008831833 |
| TCF7L2 | path:04630_1  | 0.008845159 |
| JUN    | path:04115_2  | 0.008970954 |
| SP1    | path:00240_5  | 0.009002988 |
| IRF1   | path:04062_2  | 0.009036068 |
| TFAP2A | path:04520_9  | 0.009046641 |
| STAT5B | path:05218_8  | 0.009060668 |
| TP53   | path:04010_16 | 0.009062653 |
| TP53   | path:04621_7  | 0.009062653 |
| TP53   | path:05014_4  | 0.009062653 |
| TP53   | path:05160_15 | 0.009062653 |

|        |               |             |
|--------|---------------|-------------|
| TP53   | path:05219_4  | 0.009062653 |
| VDR    | path:04012_14 | 0.0090937   |
| ATF2   | path:00140_5  | 0.009108588 |
| ATF2   | path:04110_16 | 0.009108588 |
| ATF2   | path:05142_10 | 0.009108588 |
| ATF2   | path:05142_4  | 0.009108588 |
| MYC    | path:04110_22 | 0.009112071 |
| MYC    | path:05212_11 | 0.009112071 |
| TP53   | path:04510_10 | 0.009131774 |
| E2F1   | path:04510_11 | 0.009147152 |
| E2F1   | path:05222_2  | 0.009147152 |
| SP1    | path:04110_1  | 0.00916136  |
| CEBPA  | path:04610_3  | 0.00918123  |
| NFIC   | path:00982_2  | 0.00921451  |
| SP1    | path:05200_24 | 0.00927462  |
| TP53   | path:04510_8  | 0.00935253  |
| IRF3   | path:04620_17 | 0.009380523 |
| IRF3   | path:04620_22 | 0.009380523 |
| IRF7   | path:04620_17 | 0.009380523 |
| IRF7   | path:04620_22 | 0.009380523 |
| GATA1  | path:04060_47 | 0.009387437 |
| VDR    | path:05214_10 | 0.009415594 |
| YY1    | path:00140_10 | 0.009417621 |
| YY1    | path:00140_16 | 0.009417621 |
| YY1    | path:00140_18 | 0.009417621 |
| YY1    | path:00140_20 | 0.009417621 |
| YY1    | path:00140_3  | 0.009417621 |
| YY1    | path:00140_4  | 0.009417621 |
| YY1    | path:04650_7  | 0.009417621 |
| YY1    | path:05210_10 | 0.009417621 |
| YY1    | path:05212_13 | 0.009417621 |
| YY1    | path:05219_4  | 0.009417621 |
| YY1    | path:05223_3  | 0.009417621 |
| TFAP2C | path:04520_9  | 0.009425324 |

|        |               |             |
|--------|---------------|-------------|
| STAT5B | path:04110_20 | 0.009500448 |
| STAT5B | path:04110_27 | 0.009500448 |
| STAT5B | path:05200_29 | 0.009500448 |
| STAT5B | path:05218_5  | 0.009500448 |
| IRF3   | path:04620_9  | 0.009501335 |
| IRF7   | path:04620_9  | 0.009501335 |
| MYC    | path:04310_7  | 0.009572529 |
| MYC    | path:04630_1  | 0.009572529 |
| TP53   | path:04510_6  | 0.009576653 |
| CREB1  | path:05200_18 | 0.009649083 |
| YBX1   | path:04810_32 | 0.009732845 |
| YBX1   | path:05200_6  | 0.009732845 |
| VDR    | path:00980_2  | 0.00973729  |
| VDR    | path:00140_1  | 0.009786942 |
| VDR    | path:00140_25 | 0.009786942 |
| VDR    | path:00140_26 | 0.009786942 |
| VDR    | path:05215_11 | 0.009786942 |
| EGR1   | path:04060_8  | 0.009869535 |
| SREBF1 | path:00100_9  | 0.009882974 |
| SREBF1 | path:03320_2  | 0.009882974 |
| ATF1   | path:04110_18 | 0.009914183 |
| YBX1   | path:05214_10 | 0.009960619 |
| YBX1   | path:05215_10 | 0.009960619 |
| TCF7L2 | path:04110_18 | 0.009975012 |
| YY1    | path:00140_13 | 0.009975361 |
| YY1    | path:00140_19 | 0.009975361 |
| YY1    | path:00140_7  | 0.009975361 |
| YY1    | path:04115_4  | 0.009975361 |
| YY1    | path:05214_15 | 0.009975361 |
| YY1    | path:05218_7  | 0.009975361 |
| YY1    | path:05220_11 | 0.009975361 |

---

**Table S2. The detailed information of the TFs degree distribution in the TSN.**

| TF_Name | Degree |
|---------|--------|
| AKNA    | 16     |
| AR      | 20     |
| ATF1    | 1      |
| ATF2    | 36     |
| CEBPA   | 4      |
| CEBPB   | 9      |
| CREB1   | 27     |
| CREM    | 1      |
| E2F1    | 33     |
| EGR1    | 11     |
| ELF1    | 13     |
| ENO1    | 19     |
| ESR1    | 8      |
| ETV4    | 1      |
| FOS     | 8      |
| FOSL1   | 1      |
| FOXA2   | 3      |
| FOXA3   | 18     |
| GATA1   | 1      |
| GATA2   | 1      |
| GATA3   | 1      |
| GATA4   | 22     |
| GATA6   | 9      |
| GLI1    | 3      |
| GLI3    | 6      |
| HMGA1   | 1      |
| HNF1A   | 10     |
| HNF4A   | 25     |
| IRF1    | 15     |
| IRF3    | 12     |
| IRF5    | 5      |
| IRF7    | 12     |

|        |     |
|--------|-----|
| JUN    | 25  |
| JUNB   | 2   |
| JUND   | 1   |
| KLF4   | 31  |
| KLF5   | 3   |
| LEF1   | 18  |
| MITF   | 2   |
| MYC    | 45  |
| NFATC1 | 3   |
| NFE2L2 | 6   |
| NFIC   | 32  |
| NFYA   | 17  |
| NR1I2  | 4   |
| NR1I3  | 5   |
| NR2F1  | 1   |
| NR4A1  | 14  |
| NR5A1  | 21  |
| NR5A2  | 10  |
| NRL    | 1   |
| PAX6   | 28  |
| POU2F1 | 23  |
| RBPJ   | 37  |
| REL    | 4   |
| RELA   | 18  |
| RFX1   | 21  |
| RFX2   | 21  |
| RFX3   | 21  |
| RUNX3  | 1   |
| SMAD2  | 13  |
| SMAD3  | 9   |
| SMAD4  | 10  |
| SP1    | 186 |
| SP3    | 87  |
| SPI1   | 15  |



|        |    |
|--------|----|
| SREBF1 | 4  |
| SRF    | 5  |
| STAT1  | 11 |
| STAT3  | 7  |
| STAT4  | 1  |
| STAT5A | 1  |
| STAT5B | 17 |
| STAT6  | 4  |
| TCF7   | 1  |
| TCF7L2 | 18 |
| TFAP2A | 46 |
| TFAP2C | 3  |
| THRB   | 1  |
| TP53   | 72 |
| TP63   | 19 |
| TP73   | 6  |
| TXK    | 4  |
| VDR    | 35 |
| XBP1   | 21 |
| YBX1   | 45 |
| YY1    | 40 |
| ZBTB7A | 24 |
| ZBTB7B | 18 |

---

**Table S3. The detailed information of the co-motif TFs regulated sub-pathways.**

| TF   | Subpathway    | P value  |
|------|---------------|----------|
| AR   | path:05220_9  | 0.005795 |
| AR   | path:05200_16 | 0.005795 |
| AR   | path:05219_4  | 0.006067 |
| AR   | path:05214_13 | 0.005795 |
| AR   | path:04115_1  | 0.000667 |
| AR   | path:05218_7  | 0.006236 |
| AR   | path:04115_2  | 0.005795 |
| AR   | path:04115_7  | 0.005795 |
| AR   | path:05215_1  | 0.006236 |
| AR   | path:04115_4  | 0.005795 |
| AR   | path:05214_14 | 0.005795 |
| AR   | path:05216_4  | 0.006067 |
| AR   | path:05200_47 | 0.005795 |
| AR   | path:04115_3  | 0.000667 |
| AR   | path:05200_51 | 0.006067 |
| AR   | path:04110_18 | 0.002649 |
| AR   | path:05214_15 | 0.006236 |
| AR   | path:04110_23 | 0.003572 |
| AR   | path:05220_12 | 0.005795 |
| AR   | path:05220_11 | 0.006236 |
| ATF1 | path:04110_18 | 0.009914 |
| ATF2 | path:00140_5  | 0.009109 |
| ATF2 | path:05219_4  | 0.007303 |
| ATF2 | path:04620_22 | 3.02E-05 |
| ATF2 | path:04110_26 | 0.004085 |
| ATF2 | path:04110_4  | 0.004085 |
| ATF2 | path:04110_3  | 0.004085 |
| ATF2 | path:05200_51 | 0.007303 |
| ATF2 | path:05142_10 | 0.009109 |
| ATF2 | path:04650_20 | 0.00458  |
| ATF2 | path:04620_17 | 3.02E-05 |
| ATF2 | path:00140_7  | 0.008207 |

|       |               |          |
|-------|---------------|----------|
| ATF2  | path:05220_12 | 0.006676 |
| ATF2  | path:04110_23 | 0.004085 |
| ATF2  | path:05020_9  | 0.00458  |
| ATF2  | path:05214_21 | 0.006676 |
| ATF2  | path:04110_18 | 0.003077 |
| ATF2  | path:00140_9  | 0.005779 |
| ATF2  | path:04620_16 | 0.000747 |
| ATF2  | path:05218_7  | 0.008207 |
| ATF2  | path:05214_15 | 0.008207 |
| ATF2  | path:05214_13 | 0.006676 |
| ATF2  | path:05200_29 | 0.00232  |
| ATF2  | path:04110_19 | 0.00458  |
| ATF2  | path:04620_9  | 3.02E-05 |
| ATF2  | path:05220_11 | 0.008207 |
| ATF2  | path:04110_16 | 0.009109 |
| ATF2  | path:04620_12 | 0.000408 |
| ATF2  | path:05212_13 | 0.007303 |
| ATF2  | path:04612_7  | 0.00458  |
| ATF2  | path:05142_4  | 0.009109 |
| ATF2  | path:00140_8  | 0.005779 |
| ATF2  | path:04110_17 | 0.004619 |
| ATF2  | path:05210_10 | 0.007303 |
| ATF2  | path:05223_3  | 0.007303 |
| ATF2  | path:04620_18 | 1.46E-05 |
| ATF2  | path:00140_18 | 0.006676 |
| CEBPA | path:04610_6  | 0.000182 |
| CEBPA | path:04610_4  | 0.000182 |
| CEBPA | path:04610_3  | 0.009181 |
| CEBPA | path:04060_54 | 0.004217 |
| CEBPB | path:04062_2  | 0.000193 |
| CEBPB | path:04620_12 | 6.69E-07 |
| CEBPB | path:04620_17 | 4.38E-06 |
| CEBPB | path:04062_1  | 0.000853 |
| CEBPB | path:04620_18 | 9.27E-07 |

|       |               |          |
|-------|---------------|----------|
| CEBPB | path:04620_16 | 9.58E-07 |
| CEBPB | path:04060_56 | 1.23E-05 |
| CEBPB | path:04620_22 | 4.38E-06 |
| CEBPB | path:04620_9  | 4.77E-06 |
| CREB1 | path:04620_17 | 0.001278 |
| CREB1 | path:04514_3  | 0.004288 |
| CREB1 | path:05320_4  | 0.004131 |
| CREB1 | path:05322_6  | 0.004131 |
| CREB1 | path:05322_5  | 0.004131 |
| CREB1 | path:05320_1  | 0.004131 |
| CREB1 | path:05330_2  | 0.004131 |
| CREB1 | path:05310_3  | 0.004131 |
| CREB1 | path:05150_14 | 0.004288 |
| CREB1 | path:04620_22 | 0.001278 |
| CREB1 | path:04672_4  | 0.004131 |
| CREB1 | path:04620_16 | 0.004131 |
| CREB1 | path:05310_1  | 0.004131 |
| CREB1 | path:04620_12 | 0.004131 |
| CREB1 | path:05330_1  | 0.004131 |
| CREB1 | path:04620_9  | 0.001278 |
| CREB1 | path:04612_3  | 0.004288 |
| CREB1 | path:04514_1  | 0.004288 |
| CREB1 | path:04620_18 | 0.000628 |
| CREB1 | path:05332_1  | 0.004131 |
| CREB1 | path:05416_4  | 0.004131 |
| CREB1 | path:04940_1  | 0.004131 |
| CREB1 | path:05330_4  | 0.004131 |
| CREB1 | path:05320_3  | 0.004131 |
| CREB1 | path:05320_6  | 0.004131 |
| CREB1 | path:05200_18 | 0.009649 |
| CREB1 | path:04672_5  | 0.004131 |
| CREM  | path:05200_29 | 0.00082  |
| E2F1  | path:04110_22 | 0.000309 |
| E2F1  | path:04110_4  | 1.13E-07 |

|      |               |          |
|------|---------------|----------|
| E2F1 | path:04110_26 | 1.13E-07 |
| E2F1 | path:05214_21 | 1.07E-05 |
| E2F1 | path:04110_20 | 2.73E-06 |
| E2F1 | path:04115_1  | 0.005    |
| E2F1 | path:05218_7  | 1.13E-07 |
| E2F1 | path:05200_52 | 9.20E-09 |
| E2F1 | path:05200_54 | 0.002554 |
| E2F1 | path:04110_3  | 1.13E-07 |
| E2F1 | path:05200_51 | 1.56E-05 |
| E2F1 | path:04110_15 | 0.008122 |
| E2F1 | path:05214_13 | 1.07E-05 |
| E2F1 | path:05222_1  | 3.73E-07 |
| E2F1 | path:05222_2  | 0.009147 |
| E2F1 | path:05215_7  | 1.56E-05 |
| E2F1 | path:04110_19 | 1.74E-07 |
| E2F1 | path:05014_4  | 0.00459  |
| E2F1 | path:05223_3  | 1.10E-07 |
| E2F1 | path:05220_12 | 1.07E-05 |
| E2F1 | path:05212_13 | 1.10E-07 |
| E2F1 | path:04110_7  | 1.74E-05 |
| E2F1 | path:05220_11 | 1.13E-07 |
| E2F1 | path:04510_11 | 0.009147 |
| E2F1 | path:04110_23 | 1.13E-07 |
| E2F1 | path:04110_17 | 9.20E-09 |
| E2F1 | path:04110_27 | 2.73E-06 |
| E2F1 | path:05214_15 | 1.13E-07 |
| E2F1 | path:05200_53 | 1.85E-07 |
| E2F1 | path:05218_8  | 0.000198 |
| E2F1 | path:04110_1  | 0.000198 |
| E2F1 | path:04110_16 | 0.006873 |
| E2F1 | path:05219_4  | 1.10E-07 |
| EGR1 | path:05218_4  | 0.003154 |
| EGR1 | path:04510_10 | 0.0007   |
| EGR1 | path:04060_8  | 0.00987  |

|      |               |          |
|------|---------------|----------|
| EGR1 | path:04510_8  | 0.003154 |
| EGR1 | path:04510_18 | 0.0007   |
| EGR1 | path:04540_13 | 0.003154 |
| EGR1 | path:05212_12 | 0.008366 |
| EGR1 | path:04512_3  | 0.001297 |
| EGR1 | path:04510_6  | 0.003154 |
| EGR1 | path:05146_9  | 0.003154 |
| EGR1 | path:05212_11 | 0.007008 |
| ELF1 | path:04650_15 | 0.000687 |
| ELF1 | path:05310_5  | 0.000687 |
| ELF1 | path:04650_1  | 0.006321 |
| ELF1 | path:04650_14 | 0.001226 |
| ELF1 | path:04664_10 | 0.000533 |
| ELF1 | path:04664_3  | 0.000533 |
| ELF1 | path:05310_4  | 0.000687 |
| ELF1 | path:04664_2  | 1.05E-05 |
| ELF1 | path:04060_8  | 8.41E-06 |
| ELF1 | path:04664_9  | 0.000533 |
| ELF1 | path:04664_1  | 0.000687 |
| ELF1 | path:04664_5  | 0.000533 |
| ELF1 | path:05142_21 | 0.006321 |
| ESR1 | path:04115_4  | 0.002948 |
| ESR1 | path:04115_1  | 0.000345 |
| ESR1 | path:05200_29 | 0.000345 |
| ESR1 | path:04115_3  | 0.002948 |
| ESR1 | path:04610_8  | 0.002948 |
| ESR1 | path:04115_7  | 0.002948 |
| ESR1 | path:00830_2  | 0.005414 |
| ESR1 | path:04115_2  | 0.002979 |
| ETV4 | path:05200_29 | 0.00082  |
| FOS  | path:04620_22 | 0.006237 |
| FOS  | path:04610_7  | 0.003174 |
| FOS  | path:04620_17 | 0.006237 |
| FOS  | path:04115_1  | 0.005719 |

|       |               |          |
|-------|---------------|----------|
| FOS   | path:05200_29 | 2.16E-08 |
| FOS   | path:04310_7  | 0.006308 |
| FOS   | path:04620_9  | 0.006237 |
| FOS   | path:04620_18 | 0.003174 |
| FOSL1 | path:05200_29 | 0.002765 |
| FOXA2 | path:04610_6  | 0.000581 |
| FOXA2 | path:04610_4  | 0.000581 |
| FOXA2 | path:04610_3  | 0.000581 |
| FOXA3 | path:00982_2  | 5.58E-05 |
| FOXA3 | path:00982_10 | 7.28E-05 |
| FOXA3 | path:00982_8  | 2.48E-05 |
| FOXA3 | path:00980_2  | 0.000327 |
| FOXA3 | path:00982_4  | 5.10E-05 |
| FOXA3 | path:00982_9  | 5.10E-05 |
| FOXA3 | path:00982_3  | 2.48E-05 |
| FOXA3 | path:00591_1  | 0.000313 |
| FOXA3 | path:00140_1  | 0.000327 |
| FOXA3 | path:00140_12 | 0.000503 |
| FOXA3 | path:00982_5  | 5.10E-05 |
| FOXA3 | path:00140_11 | 0.000189 |
| FOXA3 | path:00982_6  | 0.000249 |
| FOXA3 | path:00140_26 | 0.000327 |
| FOXA3 | path:00982_11 | 2.48E-05 |
| FOXA3 | path:00140_25 | 0.000327 |
| FOXA3 | path:00830_2  | 0.000976 |
| FOXA3 | path:00982_7  | 2.48E-05 |
| GATA1 | path:04060_47 | 0.009387 |
| GATA2 | path:04060_47 | 0.002977 |
| GATA3 | path:04612_4  | 0.003995 |
| GATA4 | path:00140_18 | 0.001238 |
| GATA4 | path:00140_7  | 0.001238 |
| GATA4 | path:00590_1  | 0.00061  |
| GATA4 | path:00982_5  | 0.001238 |
| GATA4 | path:00140_9  | 0.001227 |

|       |               |          |
|-------|---------------|----------|
| GATA4 | path:00140_8  | 0.001227 |
| GATA4 | path:00590_3  | 0.00061  |
| GATA4 | path:00140_16 | 0.001238 |
| GATA4 | path:00982_10 | 0.001959 |
| GATA4 | path:00591_1  | 0.00061  |
| GATA4 | path:00140_5  | 0.00147  |
| GATA4 | path:00982_4  | 0.001238 |
| GATA4 | path:00140_19 | 0.001238 |
| GATA4 | path:00140_13 | 0.001238 |
| GATA4 | path:00140_6  | 0.001711 |
| GATA4 | path:00140_3  | 0.001238 |
| GATA4 | path:00590_4  | 0.00061  |
| GATA4 | path:00980_2  | 0.00061  |
| GATA4 | path:00982_9  | 0.001238 |
| GATA4 | path:00140_4  | 0.001238 |
| GATA4 | path:00140_10 | 0.001238 |
| GATA4 | path:00590_2  | 0.00061  |
| GATA6 | path:00591_1  | 0.001855 |
| GATA6 | path:00982_9  | 0.005343 |
| GATA6 | path:00590_2  | 0.001855 |
| GATA6 | path:00590_4  | 0.001855 |
| GATA6 | path:00982_10 | 0.008695 |
| GATA6 | path:00982_5  | 0.005343 |
| GATA6 | path:00590_3  | 0.001855 |
| GATA6 | path:00982_4  | 0.005343 |
| GATA6 | path:00590_1  | 0.001855 |
| GLI1  | path:04340_2  | 0.002915 |
| GLI1  | path:04510_11 | 0.004578 |
| GLI1  | path:05200_34 | 0.002915 |
| GLI3  | path:05200_34 | 0.000417 |
| GLI3  | path:05200_57 | 0.003235 |
| GLI3  | path:04340_2  | 0.000417 |
| GLI3  | path:04340_1  | 0.005356 |
| GLI3  | path:05217_2  | 0.003235 |



|       |               |          |
|-------|---------------|----------|
| GLI3  | path:05217_1  | 0.003961 |
| HMGA1 | path:04060_8  | 0.004641 |
| HNF1A | path:00140_26 | 0.008513 |
| HNF1A | path:00120_5  | 0.008513 |
| HNF1A | path:00140_24 | 0.008513 |
| HNF1A | path:04610_6  | 0.008513 |
| HNF1A | path:00140_23 | 0.008513 |
| HNF1A | path:00140_25 | 0.008513 |
| HNF1A | path:00140_1  | 0.008513 |
| HNF1A | path:00982_6  | 0.008513 |
| HNF1A | path:00140_12 | 3.95E-05 |
| HNF1A | path:00140_22 | 0.008513 |
| HNF4A | path:00982_5  | 5.38E-08 |
| HNF4A | path:00120_19 | 0.003813 |
| HNF4A | path:00120_15 | 0.007303 |
| HNF4A | path:04610_6  | 0.000179 |
| HNF4A | path:00120_7  | 0.003813 |
| HNF4A | path:00830_2  | 2.36E-05 |
| HNF4A | path:00980_2  | 0.000734 |
| HNF4A | path:04610_3  | 4.35E-06 |
| HNF4A | path:04950_4  | 0.000288 |
| HNF4A | path:00120_9  | 0.000101 |
| HNF4A | path:00982_9  | 5.38E-08 |
| HNF4A | path:00590_4  | 0.001898 |
| HNF4A | path:04610_4  | 0.000101 |
| HNF4A | path:04610_2  | 4.35E-06 |
| HNF4A | path:00590_1  | 0.001808 |
| HNF4A | path:00591_1  | 0.000516 |
| HNF4A | path:00982_4  | 5.38E-08 |
| HNF4A | path:03320_2  | 0.000101 |
| HNF4A | path:03320_1  | 0.001132 |
| HNF4A | path:04610_5  | 6.69E-06 |
| HNF4A | path:00590_3  | 0.001723 |
| HNF4A | path:04610_8  | 0.001699 |

|       |               |          |
|-------|---------------|----------|
| HNF4A | path:00120_6  | 0.001699 |
| HNF4A | path:00982_10 | 2.52E-07 |
| HNF4A | path:00590_2  | 0.001723 |
| IRF1  | path:04620_22 | 0.004615 |
| IRF1  | path:04620_12 | 2.78E-05 |
| IRF1  | path:04620_16 | 0.002132 |
| IRF1  | path:04620_2  | 0.005103 |
| IRF1  | path:04620_11 | 0.005103 |
| IRF1  | path:04670_2  | 0.007172 |
| IRF1  | path:04620_1  | 0.000623 |
| IRF1  | path:04060_51 | 0.006779 |
| IRF1  | path:04620_13 | 0.001939 |
| IRF1  | path:04620_18 | 0.002013 |
| IRF1  | path:04620_9  | 0.004615 |
| IRF1  | path:04062_2  | 0.009036 |
| IRF1  | path:04620_17 | 0.004615 |
| IRF1  | path:05160_6  | 0.004615 |
| IRF1  | path:04620_14 | 0.001939 |
| IRF3  | path:04060_38 | 5.44E-05 |
| IRF3  | path:04650_6  | 5.75E-05 |
| IRF3  | path:04620_12 | 1.24E-05 |
| IRF3  | path:04620_18 | 0.005305 |
| IRF3  | path:04620_22 | 0.009381 |
| IRF3  | path:04620_16 | 0.0055   |
| IRF3  | path:04620_9  | 0.009501 |
| IRF3  | path:04620_2  | 3.65E-07 |
| IRF3  | path:04620_17 | 0.009381 |
| IRF3  | path:04620_11 | 3.65E-07 |
| IRF3  | path:04620_14 | 0.005132 |
| IRF3  | path:05160_6  | 5.75E-05 |
| IRF5  | path:04620_11 | 0.005012 |
| IRF5  | path:04060_38 | 0.005012 |
| IRF5  | path:04650_6  | 0.005012 |
| IRF5  | path:05160_6  | 0.005012 |

|      |               |          |
|------|---------------|----------|
| IRF5 | path:04620_2  | 0.005012 |
| IRF7 | path:04620_12 | 1.24E-05 |
| IRF7 | path:04620_22 | 0.009381 |
| IRF7 | path:04620_18 | 0.005305 |
| IRF7 | path:04650_6  | 5.75E-05 |
| IRF7 | path:04060_38 | 5.44E-05 |
| IRF7 | path:04620_9  | 0.009501 |
| IRF7 | path:04620_17 | 0.009381 |
| IRF7 | path:04620_11 | 3.65E-07 |
| IRF7 | path:04620_16 | 0.0055   |
| IRF7 | path:04620_2  | 3.65E-07 |
| IRF7 | path:05160_6  | 5.75E-05 |
| IRF7 | path:04620_14 | 0.005132 |
| JUN  | path:04610_7  | 0.002953 |
| JUN  | path:04620_22 | 2.03E-05 |
| JUN  | path:04115_3  | 0.007635 |
| JUN  | path:04620_9  | 2.03E-05 |
| JUN  | path:04620_12 | 6.18E-05 |
| JUN  | path:05200_29 | 2.03E-05 |
| JUN  | path:04650_20 | 0.000309 |
| JUN  | path:04210_24 | 0.002648 |
| JUN  | path:04620_17 | 2.03E-05 |
| JUN  | path:05120_6  | 0.002953 |
| JUN  | path:04940_4  | 0.002953 |
| JUN  | path:05320_9  | 0.002953 |
| JUN  | path:04310_6  | 0.004859 |
| JUN  | path:04115_4  | 0.007635 |
| JUN  | path:04620_16 | 0.000159 |
| JUN  | path:05330_5  | 0.002953 |
| JUN  | path:05332_5  | 0.002953 |
| JUN  | path:04512_23 | 0.007569 |
| JUN  | path:04115_1  | 0.00139  |
| JUN  | path:04115_2  | 0.008971 |
| JUN  | path:04620_18 | 6.60E-06 |

|      |               |          |
|------|---------------|----------|
| JUN  | path:04310_7  | 0.000877 |
| JUN  | path:04115_7  | 0.007953 |
| JUN  | path:05332_2  | 0.002953 |
| JUN  | path:05131_6  | 0.007569 |
| JUNB | path:04350_12 | 0.002723 |
| JUNB | path:04350_10 | 0.002723 |
| JUND | path:05200_29 | 6.84E-09 |
| KLF4 | path:05200_51 | 0.003573 |
| KLF4 | path:05220_11 | 0.003573 |
| KLF4 | path:04110_3  | 0.001049 |
| KLF4 | path:05210_12 | 0.003573 |
| KLF4 | path:04512_4  | 0.00714  |
| KLF4 | path:04110_20 | 0.000691 |
| KLF4 | path:04110_26 | 0.001049 |
| KLF4 | path:04110_19 | 4.70E-05 |
| KLF4 | path:04115_1  | 0.003364 |
| KLF4 | path:05210_7  | 0.003573 |
| KLF4 | path:05214_14 | 0.002858 |
| KLF4 | path:05220_12 | 0.003364 |
| KLF4 | path:04110_4  | 0.001049 |
| KLF4 | path:05220_9  | 0.002858 |
| KLF4 | path:05218_7  | 0.003573 |
| KLF4 | path:05219_4  | 0.003573 |
| KLF4 | path:04110_27 | 0.000691 |
| KLF4 | path:04512_8  | 0.00714  |
| KLF4 | path:05214_13 | 0.003364 |
| KLF4 | path:04110_23 | 0.001049 |
| KLF4 | path:04512_1  | 0.007703 |
| KLF4 | path:05200_31 | 0.003573 |
| KLF4 | path:05200_47 | 0.002858 |
| KLF4 | path:05200_52 | 0.007104 |
| KLF4 | path:05214_15 | 0.003573 |
| KLF4 | path:04512_2  | 0.007703 |
| KLF4 | path:05145_14 | 0.00714  |

|      |               |          |
|------|---------------|----------|
| KLF4 | path:04110_17 | 4.70E-05 |
| KLF4 | path:05200_53 | 0.005224 |
| KLF4 | path:04512_7  | 0.00714  |
| KLF4 | path:04110_7  | 0.001498 |
| LEF1 | path:04310_6  | 0.000672 |
| LEF1 | path:05222_1  | 0.005057 |
| LEF1 | path:04916_8  | 0.007826 |
| LEF1 | path:05210_7  | 1.30E-05 |
| LEF1 | path:05210_12 | 1.30E-05 |
| LEF1 | path:05200_31 | 1.30E-05 |
| LEF1 | path:05200_42 | 6.00E-05 |
| LEF1 | path:05222_2  | 0.004566 |
| LEF1 | path:05200_50 | 0.003595 |
| LEF1 | path:04310_7  | 0.000119 |
| LEF1 | path:05216_4  | 1.30E-05 |
| LEF1 | path:04916_3  | 0.002646 |
| LEF1 | path:05213_1  | 2.72E-05 |
| LEF1 | path:05221_1  | 5.77E-05 |
| LEF1 | path:05210_10 | 0.002646 |
| LEF1 | path:05222_7  | 0.004079 |
| LEF1 | path:05215_4  | 0.003117 |
| LEF1 | path:04916_11 | 0.005551 |
| MITF | path:00350_1  | 0.000452 |
| MITF | path:04916_3  | 1.75E-08 |
| MYC  | path:05214_21 | 0.001974 |
| MYC  | path:05200_29 | 7.20E-06 |
| MYC  | path:05210_7  | 0.002049 |
| MYC  | path:04110_26 | 0.000519 |
| MYC  | path:04110_3  | 0.000519 |
| MYC  | path:05218_5  | 0.008651 |
| MYC  | path:05218_3  | 0.002049 |
| MYC  | path:05218_7  | 0.002049 |
| MYC  | path:05210_10 | 0.002024 |
| MYC  | path:05200_31 | 0.002049 |

|     |               |          |
|-----|---------------|----------|
| MYC | path:05210_12 | 0.002049 |
| MYC | path:05200_51 | 0.002024 |
| MYC | path:05220_9  | 0.00166  |
| MYC | path:04110_7  | 0.000714 |
| MYC | path:04110_17 | 0.000714 |
| MYC | path:05220_11 | 0.002049 |
| MYC | path:04110_22 | 0.009112 |
| MYC | path:05214_14 | 0.00166  |
| MYC | path:04110_4  | 0.000519 |
| MYC | path:04310_7  | 0.009573 |
| MYC | path:05200_53 | 0.002948 |
| MYC | path:05223_3  | 0.002024 |
| MYC | path:05200_52 | 0.003951 |
| MYC | path:05212_11 | 0.009112 |
| MYC | path:05218_8  | 0.007148 |
| MYC | path:05200_42 | 0.006521 |
| MYC | path:05200_50 | 8.52E-05 |
| MYC | path:04110_23 | 0.000519 |
| MYC | path:05212_13 | 0.002024 |
| MYC | path:04110_27 | 0.000293 |
| MYC | path:04110_18 | 0.000389 |
| MYC | path:05222_1  | 8.86E-05 |
| MYC | path:05221_1  | 0.005908 |
| MYC | path:05222_2  | 8.52E-05 |
| MYC | path:05222_7  | 8.52E-05 |
| MYC | path:05214_13 | 0.001974 |
| MYC | path:05219_4  | 0.002024 |
| MYC | path:05220_12 | 0.001974 |
| MYC | path:04630_1  | 0.009573 |
| MYC | path:05200_21 | 0.002484 |
| MYC | path:05216_4  | 0.002024 |
| MYC | path:05214_15 | 0.002049 |
| MYC | path:05213_1  | 0.003438 |
| MYC | path:04110_20 | 0.000293 |

|        |               |          |
|--------|---------------|----------|
| MYC    | path:05200_47 | 0.00166  |
| NFATC1 | path:04650_20 | 0.003964 |
| NFATC1 | path:04060_32 | 0.003964 |
| NFATC1 | path:04060_33 | 0.003964 |
| NFE2L2 | path:00480_2  | 2.02E-06 |
| NFE2L2 | path:00480_5  | 0.00313  |
| NFE2L2 | path:00480_4  | 0.00313  |
| NFE2L2 | path:00480_1  | 0.00313  |
| NFE2L2 | path:00480_3  | 0.00313  |
| NFE2L2 | path:00480_6  | 0.00313  |
| NFIC   | path:05200_48 | 0.004397 |
| NFIC   | path:05220_8  | 0.004397 |
| NFIC   | path:05218_5  | 0.004397 |
| NFIC   | path:05200_51 | 0.007871 |
| NFIC   | path:05214_14 | 0.007051 |
| NFIC   | path:04115_1  | 0.008    |
| NFIC   | path:00982_9  | 0.007871 |
| NFIC   | path:04722_19 | 0.007871 |
| NFIC   | path:04115_4  | 0.007871 |
| NFIC   | path:05160_15 | 0.007871 |
| NFIC   | path:00982_7  | 0.004397 |
| NFIC   | path:04115_7  | 0.007871 |
| NFIC   | path:05220_9  | 0.007051 |
| NFIC   | path:05214_12 | 0.004397 |
| NFIC   | path:04010_30 | 0.007871 |
| NFIC   | path:04660_8  | 0.007871 |
| NFIC   | path:05200_47 | 0.007051 |
| NFIC   | path:00982_11 | 0.005989 |
| NFIC   | path:00982_2  | 0.009215 |
| NFIC   | path:05214_13 | 0.007871 |
| NFIC   | path:00591_1  | 0.004397 |
| NFIC   | path:04115_3  | 0.007871 |
| NFIC   | path:00982_8  | 0.004397 |
| NFIC   | path:05220_12 | 0.007871 |

|       |               |          |
|-------|---------------|----------|
| NFIC  | path:04080_7  | 0.004397 |
| NFIC  | path:04115_2  | 0.007871 |
| NFIC  | path:04662_6  | 0.007871 |
| NFIC  | path:04010_31 | 0.007871 |
| NFIC  | path:00982_5  | 0.007871 |
| NFIC  | path:00982_3  | 0.005989 |
| NFIC  | path:00982_4  | 0.007871 |
| NFIC  | path:05218_6  | 0.004397 |
| NFYA  | path:04110_4  | 0.004714 |
| NFYA  | path:04110_22 | 0.002132 |
| NFYA  | path:04115_7  | 0.000776 |
| NFYA  | path:04110_26 | 0.004552 |
| NFYA  | path:04115_1  | 0.001111 |
| NFYA  | path:04110_19 | 0.005565 |
| NFYA  | path:04110_12 | 0.003795 |
| NFYA  | path:04115_3  | 0.000776 |
| NFYA  | path:04110_23 | 0.000299 |
| NFYA  | path:04110_7  | 0.000341 |
| NFYA  | path:04110_1  | 0.001445 |
| NFYA  | path:04110_8  | 0.004552 |
| NFYA  | path:04110_17 | 0.000341 |
| NFYA  | path:04115_4  | 0.000776 |
| NFYA  | path:04115_2  | 0.000124 |
| NFYA  | path:04110_3  | 0.000299 |
| NFYA  | path:04110_11 | 0.005383 |
| NR112 | path:00982_5  | 0.000119 |
| NR112 | path:00830_2  | 0.004391 |
| NR112 | path:00982_4  | 0.000119 |
| NR112 | path:00982_9  | 0.000119 |
| NR113 | path:00982_5  | 0.000536 |
| NR113 | path:00982_9  | 0.000536 |
| NR113 | path:00982_4  | 0.000536 |
| NR113 | path:00830_2  | 0.000187 |
| NR113 | path:00980_1  | 0.006275 |



|       |               |          |
|-------|---------------|----------|
| NR2F1 | path:03320_2  | 0.000133 |
| NR4A1 | path:00140_8  | 0.000777 |
| NR4A1 | path:00140_5  | 0.00096  |
| NR4A1 | path:00140_10 | 0.000777 |
| NR4A1 | path:00140_7  | 0.000832 |
| NR4A1 | path:00140_4  | 0.000777 |
| NR4A1 | path:00140_9  | 0.000777 |
| NR4A1 | path:00140_6  | 0.00109  |
| NR4A1 | path:00140_16 | 0.000777 |
| NR4A1 | path:00140_14 | 0.000777 |
| NR4A1 | path:00140_20 | 0.000777 |
| NR4A1 | path:00140_18 | 0.000777 |
| NR4A1 | path:00140_13 | 6.42E-06 |
| NR4A1 | path:00140_19 | 0.000832 |
| NR4A1 | path:00140_3  | 0.000777 |
| NR5A1 | path:04350_13 | 0.002226 |
| NR5A1 | path:00140_23 | 5.77E-05 |
| NR5A1 | path:00140_22 | 5.77E-05 |
| NR5A1 | path:00140_16 | 1.15E-06 |
| NR5A1 | path:00140_24 | 5.77E-05 |
| NR5A1 | path:04060_21 | 8.93E-05 |
| NR5A1 | path:00140_4  | 0.000624 |
| NR5A1 | path:00140_18 | 1.15E-06 |
| NR5A1 | path:00140_7  | 1.72E-06 |
| NR5A1 | path:00140_5  | 2.18E-06 |
| NR5A1 | path:00140_6  | 2.70E-06 |
| NR5A1 | path:00140_10 | 1.53E-06 |
| NR5A1 | path:00140_20 | 0.000624 |
| NR5A1 | path:00140_9  | 1.09E-06 |
| NR5A1 | path:00140_8  | 1.09E-06 |
| NR5A1 | path:00140_19 | 1.72E-06 |
| NR5A1 | path:00140_13 | 6.63E-09 |
| NR5A1 | path:00140_14 | 0.000394 |
| NR5A1 | path:00140_3  | 0.000624 |

|       |               |          |
|-------|---------------|----------|
| NR5A1 | path:00140_12 | 0.000117 |
| NR5A1 | path:00140_11 | 1.69E-05 |
| NR5A2 | path:00140_4  | 0.00309  |
| NR5A2 | path:00140_18 | 0.00309  |
| NR5A2 | path:00140_9  | 0.002899 |
| NR5A2 | path:00140_11 | 0.000443 |
| NR5A2 | path:00140_5  | 0.00386  |
| NR5A2 | path:00140_12 | 0.002213 |
| NR5A2 | path:00140_6  | 0.004244 |
| NR5A2 | path:00140_7  | 0.003475 |
| NR5A2 | path:00140_8  | 0.002899 |
| NR5A2 | path:00140_3  | 0.00309  |
| PAX6  | path:04512_23 | 4.96E-05 |
| PAX6  | path:04510_6  | 0.000221 |
| PAX6  | path:04510_10 | 0.000221 |
| PAX6  | path:04514_57 | 6.38E-05 |
| PAX6  | path:04670_9  | 4.96E-05 |
| PAX6  | path:04510_18 | 0.008727 |
| PAX6  | path:05100_3  | 6.38E-05 |
| PAX6  | path:04510_20 | 2.77E-05 |
| PAX6  | path:04670_20 | 0.000615 |
| PAX6  | path:04810_29 | 4.23E-05 |
| PAX6  | path:04510_8  | 0.000221 |
| PAX6  | path:04512_24 | 6.38E-05 |
| PAX6  | path:04670_2  | 0.00217  |
| PAX6  | path:04514_56 | 9.92E-05 |
| PAX6  | path:04670_14 | 0.000678 |
| PAX6  | path:05100_10 | 0.000174 |
| PAX6  | path:04514_49 | 0.000131 |
| PAX6  | path:04510_17 | 0.004905 |
| PAX6  | path:04510_7  | 0.006714 |
| PAX6  | path:05414_2  | 1.40E-05 |
| PAX6  | path:05131_6  | 4.96E-05 |
| PAX6  | path:04510_4  | 5.33E-05 |

|        |               |          |
|--------|---------------|----------|
| PAX6   | path:04510_1  | 7.62E-06 |
| PAX6   | path:05131_5  | 4.96E-05 |
| PAX6   | path:04514_50 | 0.000131 |
| PAX6   | path:04512_9  | 0.004167 |
| PAX6   | path:05140_1  | 6.38E-05 |
| PAX6   | path:04510_19 | 7.62E-06 |
| POU2F1 | path:05200_52 | 0.00087  |
| POU2F1 | path:00590_2  | 0.00087  |
| POU2F1 | path:05200_51 | 0.000647 |
| POU2F1 | path:00591_1  | 0.006943 |
| POU2F1 | path:00590_1  | 0.00087  |
| POU2F1 | path:05200_50 | 0.000667 |
| POU2F1 | path:04110_19 | 0.000667 |
| POU2F1 | path:00982_5  | 0.000647 |
| POU2F1 | path:00830_2  | 3.54E-05 |
| POU2F1 | path:00980_2  | 0.008647 |
| POU2F1 | path:00982_4  | 0.000647 |
| POU2F1 | path:04110_17 | 0.000667 |
| POU2F1 | path:04664_5  | 0.003468 |
| POU2F1 | path:04664_2  | 0.007941 |
| POU2F1 | path:04110_25 | 0.001501 |
| POU2F1 | path:05222_1  | 0.00087  |
| POU2F1 | path:04110_18 | 0.000623 |
| POU2F1 | path:05222_2  | 0.00087  |
| POU2F1 | path:04110_20 | 0.003159 |
| POU2F1 | path:00982_9  | 0.000647 |
| POU2F1 | path:04110_27 | 0.003159 |
| POU2F1 | path:00590_3  | 0.00087  |
| POU2F1 | path:00590_4  | 0.00087  |
| RBPJ   | path:05160_17 | 0.001146 |
| RBPJ   | path:05215_12 | 0.001146 |
| RBPJ   | path:04920_1  | 0.002376 |
| RBPJ   | path:05140_9  | 0.001146 |
| RBPJ   | path:04620_25 | 0.001146 |

|      |               |          |
|------|---------------|----------|
| RBPJ | path:05222_10 | 0.001907 |
| RBPJ | path:04660_1  | 0.00151  |
| RBPJ | path:04620_18 | 0.00151  |
| RBPJ | path:05145_5  | 0.001146 |
| RBPJ | path:05215_2  | 0.001146 |
| RBPJ | path:05140_13 | 0.001146 |
| RBPJ | path:05142_21 | 0.001146 |
| RBPJ | path:05220_6  | 0.001146 |
| RBPJ | path:04920_11 | 0.002086 |
| RBPJ | path:05200_18 | 0.002593 |
| RBPJ | path:05142_8  | 0.002593 |
| RBPJ | path:04062_19 | 0.001225 |
| RBPJ | path:04622_5  | 0.001558 |
| RBPJ | path:04621_4  | 0.0014   |
| RBPJ | path:05160_3  | 0.001225 |
| RBPJ | path:04623_5  | 0.001146 |
| RBPJ | path:05131_12 | 0.001907 |
| RBPJ | path:05160_8  | 0.001558 |
| RBPJ | path:05215_3  | 0.003899 |
| RBPJ | path:04662_1  | 0.001558 |
| RBPJ | path:04722_13 | 0.00256  |
| RBPJ | path:04722_24 | 0.001225 |
| RBPJ | path:04210_3  | 0.001225 |
| RBPJ | path:05131_9  | 0.001225 |
| RBPJ | path:04620_10 | 0.001146 |
| RBPJ | path:04622_3  | 0.001146 |
| RBPJ | path:05120_3  | 0.001146 |
| RBPJ | path:04620_9  | 0.002593 |
| RBPJ | path:04620_15 | 0.001146 |
| RBPJ | path:05120_6  | 0.001225 |
| RBPJ | path:05222_9  | 0.002195 |
| RBPJ | path:05131_10 | 0.002195 |
| REL  | path:04612_7  | 0.005201 |
| REL  | path:04060_8  | 0.004163 |

|      |               |          |
|------|---------------|----------|
| REL  | path:04650_23 | 0.000199 |
| REL  | path:04650_22 | 0.000199 |
| RELA | path:04620_22 | 6.51E-08 |
| RELA | path:04062_2  | 3.87E-08 |
| RELA | path:04620_18 | 8.85E-09 |
| RELA | path:04620_17 | 6.51E-08 |
| RELA | path:04620_9  | 7.78E-08 |
| RELA | path:04620_13 | 1.51E-07 |
| RELA | path:04110_7  | 0.001869 |
| RELA | path:04115_1  | 0.000554 |
| RELA | path:04110_17 | 0.001869 |
| RELA | path:04650_23 | 0.001782 |
| RELA | path:04060_62 | 0.000137 |
| RELA | path:04620_1  | 2.11E-06 |
| RELA | path:04620_12 | 4.80E-09 |
| RELA | path:04110_19 | 0.001782 |
| RELA | path:04620_14 | 2.07E-07 |
| RELA | path:04650_22 | 0.001974 |
| RELA | path:04620_16 | 1.03E-08 |
| RELA | path:04062_1  | 2.04E-07 |
| RFX1 | path:05320_3  | 2.14E-06 |
| RFX1 | path:05330_7  | 5.59E-06 |
| RFX1 | path:05310_1  | 2.14E-06 |
| RFX1 | path:05322_6  | 2.14E-06 |
| RFX1 | path:05320_4  | 2.14E-06 |
| RFX1 | path:05330_4  | 2.14E-06 |
| RFX1 | path:04612_3  | 2.14E-06 |
| RFX1 | path:05150_14 | 2.14E-06 |
| RFX1 | path:05310_3  | 2.14E-06 |
| RFX1 | path:05330_2  | 2.14E-06 |
| RFX1 | path:04940_1  | 2.14E-06 |
| RFX1 | path:05320_6  | 2.14E-06 |
| RFX1 | path:04514_3  | 2.14E-06 |
| RFX1 | path:04672_4  | 2.14E-06 |

|      |               |          |
|------|---------------|----------|
| RFX1 | path:05322_5  | 2.14E-06 |
| RFX1 | path:04514_1  | 2.14E-06 |
| RFX1 | path:04672_5  | 2.14E-06 |
| RFX1 | path:05330_1  | 2.14E-06 |
| RFX1 | path:05320_1  | 2.14E-06 |
| RFX1 | path:05332_1  | 2.14E-06 |
| RFX1 | path:05416_4  | 2.14E-06 |
| RFX2 | path:05330_4  | 3.82E-07 |
| RFX2 | path:05310_1  | 3.82E-07 |
| RFX2 | path:05320_1  | 3.82E-07 |
| RFX2 | path:04612_3  | 3.82E-07 |
| RFX2 | path:05322_6  | 3.82E-07 |
| RFX2 | path:05150_14 | 3.82E-07 |
| RFX2 | path:05320_4  | 3.82E-07 |
| RFX2 | path:05322_5  | 3.82E-07 |
| RFX2 | path:05330_7  | 1.00E-06 |
| RFX2 | path:05330_1  | 3.82E-07 |
| RFX2 | path:04672_4  | 3.82E-07 |
| RFX2 | path:05332_1  | 3.82E-07 |
| RFX2 | path:05330_2  | 3.82E-07 |
| RFX2 | path:05320_3  | 3.82E-07 |
| RFX2 | path:04672_5  | 3.82E-07 |
| RFX2 | path:04514_3  | 3.82E-07 |
| RFX2 | path:05310_3  | 3.82E-07 |
| RFX2 | path:05416_4  | 3.82E-07 |
| RFX2 | path:04940_1  | 3.82E-07 |
| RFX2 | path:04514_1  | 3.82E-07 |
| RFX2 | path:05320_6  | 3.82E-07 |
| RFX3 | path:05320_1  | 1.53E-07 |
| RFX3 | path:05330_7  | 4.00E-07 |
| RFX3 | path:04672_5  | 1.53E-07 |
| RFX3 | path:05330_2  | 1.53E-07 |
| RFX3 | path:04612_3  | 1.53E-07 |
| RFX3 | path:04672_4  | 1.53E-07 |

|       |               |          |
|-------|---------------|----------|
| RFX3  | path:04514_1  | 1.53E-07 |
| RFX3  | path:05330_4  | 1.53E-07 |
| RFX3  | path:05310_1  | 1.53E-07 |
| RFX3  | path:05322_5  | 1.53E-07 |
| RFX3  | path:05150_14 | 1.53E-07 |
| RFX3  | path:05310_3  | 1.53E-07 |
| RFX3  | path:05320_4  | 1.53E-07 |
| RFX3  | path:05322_6  | 1.53E-07 |
| RFX3  | path:05320_3  | 1.53E-07 |
| RFX3  | path:05330_1  | 1.53E-07 |
| RFX3  | path:04940_1  | 1.53E-07 |
| RFX3  | path:05416_4  | 1.53E-07 |
| RFX3  | path:05320_6  | 1.53E-07 |
| RFX3  | path:04514_3  | 1.53E-07 |
| RFX3  | path:05332_1  | 1.53E-07 |
| RUNX3 | path:04612_4  | 0.000198 |
| SMAD2 | path:04510_6  | 0.002748 |
| SMAD2 | path:04510_8  | 0.002748 |
| SMAD2 | path:05146_9  | 0.003683 |
| SMAD2 | path:04110_18 | 6.60E-05 |
| SMAD2 | path:04512_11 | 0.005671 |
| SMAD2 | path:04510_10 | 0.002748 |
| SMAD2 | path:04512_13 | 5.26E-05 |
| SMAD2 | path:04512_6  | 0.000166 |
| SMAD2 | path:04110_25 | 5.26E-05 |
| SMAD2 | path:04510_1  | 5.26E-05 |
| SMAD2 | path:04512_12 | 0.000122 |
| SMAD2 | path:04510_19 | 5.26E-05 |
| SMAD2 | path:04512_14 | 0.005849 |
| SMAD3 | path:04512_13 | 0.000922 |
| SMAD3 | path:04110_18 | 0.00105  |
| SMAD3 | path:04110_25 | 0.000922 |
| SMAD3 | path:05200_29 | 0.000922 |
| SMAD3 | path:04512_12 | 0.001326 |

|       |               |          |
|-------|---------------|----------|
| SMAD3 | path:05210_10 | 0.007105 |
| SMAD3 | path:04512_6  | 0.001837 |
| SMAD3 | path:04510_1  | 0.001054 |
| SMAD3 | path:04510_19 | 0.00117  |
| SMAD4 | path:04115_2  | 0.003046 |
| SMAD4 | path:04115_7  | 0.003046 |
| SMAD4 | path:05210_9  | 0.006805 |
| SMAD4 | path:04115_4  | 0.003046 |
| SMAD4 | path:05200_29 | 0.000734 |
| SMAD4 | path:04110_25 | 0.00062  |
| SMAD4 | path:04115_3  | 0.003046 |
| SMAD4 | path:04110_18 | 0.000744 |
| SMAD4 | path:05210_10 | 0.00471  |
| SMAD4 | path:04115_1  | 0.003366 |
| SP1   | path:04512_20 | 0.00215  |
| SP1   | path:04510_17 | 0.000141 |
| SP1   | path:04110_3  | 6.46E-09 |
| SP1   | path:05200_51 | 5.54E-09 |
| SP1   | path:05014_4  | 0.008609 |
| SP1   | path:00140_19 | 2.77E-05 |
| SP1   | path:00140_6  | 8.66E-05 |
| SP1   | path:05218_6  | 1.33E-05 |
| SP1   | path:04510_10 | 1.05E-10 |
| SP1   | path:04510_8  | 6.16E-10 |
| SP1   | path:04510_25 | 0.002499 |
| SP1   | path:05200_29 | 9.21E-07 |
| SP1   | path:05218_7  | 9.21E-07 |
| SP1   | path:05212_13 | 1.44E-05 |
| SP1   | path:05016_8  | 0.007434 |
| SP1   | path:05216_4  | 0.000441 |
| SP1   | path:04510_6  | 1.07E-10 |
| SP1   | path:04620_18 | 0.000204 |
| SP1   | path:05414_2  | 1.77E-05 |
| SP1   | path:04110_22 | 1.43E-05 |



|     |               |          |
|-----|---------------|----------|
| SP1 | path:05146_2  | 7.92E-07 |
| SP1 | path:04512_11 | 5.55E-06 |
| SP1 | path:04610_3  | 9.21E-07 |
| SP1 | path:05142_11 | 0.003931 |
| SP1 | path:05140_6  | 0.000246 |
| SP1 | path:05200_4  | 0.00029  |
| SP1 | path:00120_2  | 0.003886 |
| SP1 | path:04115_2  | 6.74E-05 |
| SP1 | path:00140_11 | 0.001535 |
| SP1 | path:05222_4  | 2.01E-05 |
| SP1 | path:00140_4  | 1.44E-05 |
| SP1 | path:05142_10 | 0.001108 |
| SP1 | path:04520_5  | 0.001603 |
| SP1 | path:04610_7  | 0.000134 |
| SP1 | path:04512_18 | 0.000246 |
| SP1 | path:05146_5  | 0.00215  |
| SP1 | path:04010_10 | 0.003931 |
| SP1 | path:05145_8  | 0.006088 |
| SP1 | path:04115_3  | 4.23E-05 |
| SP1 | path:04110_23 | 5.22E-09 |
| SP1 | path:04630_3  | 1.97E-06 |
| SP1 | path:04512_10 | 2.01E-05 |
| SP1 | path:04110_19 | 1.05E-10 |
| SP1 | path:05200_56 | 0.001015 |
| SP1 | path:05200_48 | 1.33E-05 |
| SP1 | path:05210_12 | 0.000719 |
| SP1 | path:00140_9  | 0.000124 |
| SP1 | path:05214_21 | 0.000246 |
| SP1 | path:04110_26 | 7.70E-08 |
| SP1 | path:05014_3  | 0.006088 |
| SP1 | path:04115_4  | 6.18E-06 |
| SP1 | path:04610_4  | 5.55E-06 |
| SP1 | path:05146_1  | 1.23E-06 |
| SP1 | path:04510_7  | 0.000448 |

|     |               |          |
|-----|---------------|----------|
| SP1 | path:04510_13 | 0.001603 |
| SP1 | path:00140_5  | 5.07E-05 |
| SP1 | path:04810_29 | 7.92E-07 |
| SP1 | path:05218_4  | 0.000411 |
| SP1 | path:04512_6  | 6.24E-07 |
| SP1 | path:04110_17 | 1.86E-10 |
| SP1 | path:05214_14 | 2.07E-08 |
| SP1 | path:04510_16 | 0.002771 |
| SP1 | path:04620_9  | 0.001894 |
| SP1 | path:05200_31 | 0.000719 |
| SP1 | path:00140_3  | 1.44E-05 |
| SP1 | path:04010_26 | 0.000441 |
| SP1 | path:05214_2  | 0.005536 |
| SP1 | path:05200_19 | 0.003935 |
| SP1 | path:00140_25 | 0.001894 |
| SP1 | path:04512_22 | 0.008609 |
| SP1 | path:05222_7  | 0.001603 |
| SP1 | path:05200_20 | 0.003935 |
| SP1 | path:00140_1  | 0.001894 |
| SP1 | path:00980_2  | 0.001393 |
| SP1 | path:04110_4  | 6.46E-09 |
| SP1 | path:04520_3  | 0.005126 |
| SP1 | path:00350_3  | 0.006192 |
| SP1 | path:04630_4  | 5.95E-06 |
| SP1 | path:00140_8  | 0.000124 |
| SP1 | path:04630_2  | 0.00139  |
| SP1 | path:05320_9  | 0.007434 |
| SP1 | path:04512_5  | 2.72E-07 |
| SP1 | path:04510_1  | 7.85E-13 |
| SP1 | path:04110_7  | 4.97E-07 |
| SP1 | path:05140_10 | 0.008609 |
| SP1 | path:05219_4  | 1.44E-05 |
| SP1 | path:04510_24 | 0.002176 |
| SP1 | path:05218_5  | 0.000134 |

|     |               |          |
|-----|---------------|----------|
| SP1 | path:04512_14 | 0.000102 |
| SP1 | path:05200_52 | 1.55E-08 |
| SP1 | path:05330_5  | 0.007434 |
| SP1 | path:05212_14 | 0.008609 |
| SP1 | path:04110_27 | 2.92E-09 |
| SP1 | path:00140_14 | 0.003886 |
| SP1 | path:00330_9  | 0.005126 |
| SP1 | path:00330_1  | 0.005536 |
| SP1 | path:04540_13 | 1.22E-05 |
| SP1 | path:04510_15 | 0.001165 |
| SP1 | path:00120_1  | 0.006088 |
| SP1 | path:00350_2  | 0.006192 |
| SP1 | path:04115_7  | 4.96E-05 |
| SP1 | path:04512_27 | 0.000166 |
| SP1 | path:04650_7  | 0.008609 |
| SP1 | path:00140_13 | 2.77E-05 |
| SP1 | path:05146_9  | 9.10E-07 |
| SP1 | path:04512_3  | 1.66E-05 |
| SP1 | path:05200_38 | 0.008609 |
| SP1 | path:05220_12 | 1.18E-07 |
| SP1 | path:05145_21 | 0.001015 |
| SP1 | path:05210_7  | 0.000719 |
| SP1 | path:05215_7  | 0.008609 |
| SP1 | path:04210_20 | 0.002176 |
| SP1 | path:05100_3  | 0.001015 |
| SP1 | path:04510_18 | 8.07E-08 |
| SP1 | path:04510_23 | 0.000719 |
| SP1 | path:04310_7  | 1.77E-05 |
| SP1 | path:00140_16 | 0.000246 |
| SP1 | path:04512_13 | 7.86E-06 |
| SP1 | path:04520_7  | 0.000412 |
| SP1 | path:05200_24 | 0.009275 |
| SP1 | path:00140_10 | 1.44E-05 |
| SP1 | path:00140_18 | 0.000246 |

|     |               |          |
|-----|---------------|----------|
| SP1 | path:05200_53 | 4.11E-06 |
| SP1 | path:05214_5  | 0.005536 |
| SP1 | path:04060_32 | 0.001015 |
| SP1 | path:05332_2  | 0.007434 |
| SP1 | path:05220_9  | 2.07E-08 |
| SP1 | path:04610_6  | 9.21E-07 |
| SP1 | path:05332_5  | 0.007434 |
| SP1 | path:04722_19 | 0.000719 |
| SP1 | path:04110_18 | 4.28E-11 |
| SP1 | path:04510_5  | 0.002499 |
| SP1 | path:00240_16 | 0.005536 |
| SP1 | path:05215_10 | 0.001165 |
| SP1 | path:00240_5  | 0.009003 |
| SP1 | path:05214_15 | 9.21E-07 |
| SP1 | path:00140_12 | 0.006088 |
| SP1 | path:05210_10 | 0.000441 |
| SP1 | path:04115_1  | 3.47E-10 |
| SP1 | path:05214_12 | 1.33E-05 |
| SP1 | path:05200_42 | 0.000719 |
| SP1 | path:05142_4  | 0.001108 |
| SP1 | path:05220_5  | 0.00215  |
| SP1 | path:00140_7  | 2.77E-05 |
| SP1 | path:04310_6  | 1.33E-05 |
| SP1 | path:04110_25 | 0.006192 |
| SP1 | path:04512_19 | 0.00055  |
| SP1 | path:04110_1  | 0.009161 |
| SP1 | path:05218_8  | 7.27E-05 |
| SP1 | path:00982_10 | 0.002176 |
| SP1 | path:04010_5  | 0.000124 |
| SP1 | path:05219_3  | 0.00031  |
| SP1 | path:04510_19 | 1.96E-12 |
| SP1 | path:04510_20 | 1.43E-05 |
| SP1 | path:05142_21 | 0.000719 |
| SP1 | path:00140_20 | 0.000441 |

|     |               |          |
|-----|---------------|----------|
| SP1 | path:05200_50 | 5.07E-05 |
| SP1 | path:05214_13 | 1.18E-07 |
| SP1 | path:05223_3  | 1.44E-05 |
| SP1 | path:04510_4  | 6.74E-05 |
| SP1 | path:05220_11 | 9.21E-07 |
| SP1 | path:05222_1  | 5.36E-07 |
| SP1 | path:04940_4  | 0.007434 |
| SP1 | path:00240_2  | 0.00169  |
| SP1 | path:05220_8  | 1.33E-05 |
| SP1 | path:00240_17 | 0.003391 |
| SP1 | path:05221_1  | 0.006192 |
| SP1 | path:05200_3  | 2.01E-05 |
| SP1 | path:04610_8  | 0.000204 |
| SP1 | path:05222_2  | 0.000134 |
| SP1 | path:05142_20 | 0.000441 |
| SP1 | path:04144_2  | 7.61E-06 |
| SP1 | path:04912_8  | 1.33E-05 |
| SP1 | path:05200_47 | 2.07E-08 |
| SP1 | path:04210_24 | 0.001108 |
| SP1 | path:04512_12 | 1.66E-06 |
| SP1 | path:04060_22 | 0.00215  |
| SP1 | path:04650_20 | 4.84E-05 |
| SP1 | path:05142_17 | 0.003886 |
| SP1 | path:04512_9  | 9.36E-06 |
| SP1 | path:04060_47 | 0.007434 |
| SP1 | path:04110_20 | 2.92E-09 |
| SP1 | path:05142_18 | 0.003886 |
| SP1 | path:00120_3  | 0.003886 |
| SP1 | path:05145_19 | 0.006088 |
| SP1 | path:04630_1  | 0.000232 |
| SP3 | path:04610_7  | 0.004573 |
| SP3 | path:05200_52 | 1.23E-05 |
| SP3 | path:04510_10 | 1.24E-07 |
| SP3 | path:05200_51 | 8.65E-07 |

|     |               |          |
|-----|---------------|----------|
| SP3 | path:05212_13 | 0.001367 |
| SP3 | path:04110_3  | 3.13E-05 |
| SP3 | path:04512_18 | 0.000926 |
| SP3 | path:05218_7  | 5.63E-05 |
| SP3 | path:00140_11 | 5.63E-05 |
| SP3 | path:04510_6  | 1.24E-07 |
| SP3 | path:00140_26 | 0.005691 |
| SP3 | path:05146_2  | 1.13E-06 |
| SP3 | path:04512_27 | 0.000424 |
| SP3 | path:04110_17 | 3.14E-07 |
| SP3 | path:04512_11 | 0.000758 |
| SP3 | path:00140_9  | 0.000618 |
| SP3 | path:00140_6  | 0.000126 |
| SP3 | path:04110_22 | 0.001276 |
| SP3 | path:04510_18 | 6.32E-05 |
| SP3 | path:05144_3  | 0.002642 |
| SP3 | path:00140_13 | 5.63E-05 |
| SP3 | path:04110_26 | 0.000307 |
| SP3 | path:04510_1  | 3.35E-07 |
| SP3 | path:04110_23 | 3.02E-05 |
| SP3 | path:00140_19 | 5.63E-05 |
| SP3 | path:05200_53 | 0.003635 |
| SP3 | path:00140_4  | 4.16E-05 |
| SP3 | path:05200_48 | 0.000156 |
| SP3 | path:04110_18 | 0.000128 |
| SP3 | path:05214_14 | 0.000618 |
| SP3 | path:05214_15 | 5.63E-05 |
| SP3 | path:05220_12 | 3.02E-05 |
| SP3 | path:00140_10 | 4.16E-05 |
| SP3 | path:00140_16 | 0.000926 |
| SP3 | path:05220_9  | 0.000618 |
| SP3 | path:00120_1  | 0.000926 |
| SP3 | path:00120_2  | 0.000618 |
| SP3 | path:00140_7  | 5.63E-05 |

|     |               |          |
|-----|---------------|----------|
| SP3 | path:05414_2  | 0.001439 |
| SP3 | path:04810_29 | 0.000815 |
| SP3 | path:05146_9  | 1.78E-05 |
| SP3 | path:04512_14 | 0.000907 |
| SP3 | path:04115_1  | 0.004062 |
| SP3 | path:05223_3  | 0.001367 |
| SP3 | path:04512_5  | 2.26E-07 |
| SP3 | path:00140_5  | 8.41E-05 |
| SP3 | path:04512_6  | 5.63E-05 |
| SP3 | path:05218_8  | 0.000758 |
| SP3 | path:00140_1  | 0.006217 |
| SP3 | path:04110_4  | 3.13E-05 |
| SP3 | path:04510_20 | 0.004573 |
| SP3 | path:04110_7  | 0.007662 |
| SP3 | path:05146_1  | 1.74E-06 |
| SP3 | path:05220_11 | 5.63E-05 |
| SP3 | path:05219_4  | 4.16E-05 |
| SP3 | path:05214_13 | 3.02E-05 |
| SP3 | path:04110_19 | 2.26E-07 |
| SP3 | path:04510_7  | 0.002878 |
| SP3 | path:00982_10 | 0.004573 |
| SP3 | path:00140_12 | 0.000126 |
| SP3 | path:04512_9  | 7.41E-05 |
| SP3 | path:04512_10 | 0.000488 |
| SP3 | path:04060_43 | 0.002642 |
| SP3 | path:00140_8  | 0.000618 |
| SP3 | path:00140_25 | 0.006217 |
| SP3 | path:00140_18 | 0.000926 |
| SP3 | path:04510_19 | 6.37E-07 |
| SP3 | path:05219_3  | 0.006779 |
| SP3 | path:04512_3  | 3.50E-05 |
| SP3 | path:00140_20 | 0.001367 |
| SP3 | path:04512_13 | 5.52E-05 |
| SP3 | path:05222_1  | 0.005691 |

|        |               |          |
|--------|---------------|----------|
| SP3    | path:05218_6  | 0.000156 |
| SP3    | path:04510_17 | 0.001367 |
| SP3    | path:04144_2  | 0.000815 |
| SP3    | path:04110_27 | 4.71E-06 |
| SP3    | path:04512_19 | 0.000542 |
| SP3    | path:04512_12 | 3.50E-05 |
| SP3    | path:04610_8  | 0.005691 |
| SP3    | path:05214_12 | 0.000156 |
| SP3    | path:05220_8  | 0.000156 |
| SP3    | path:00120_3  | 0.000618 |
| SP3    | path:00140_3  | 4.16E-05 |
| SP3    | path:04115_4  | 0.002219 |
| SP3    | path:05200_47 | 0.000618 |
| SP3    | path:04110_20 | 4.71E-06 |
| SP3    | path:04510_8  | 1.24E-07 |
| SPI1   | path:05200_43 | 0.000903 |
| SPI1   | path:04145_6  | 3.11E-06 |
| SPI1   | path:04650_13 | 0.003806 |
| SPI1   | path:05140_4  | 0.00011  |
| SPI1   | path:04514_55 | 0.007631 |
| SPI1   | path:05150_17 | 0.005349 |
| SPI1   | path:04650_12 | 0.007341 |
| SPI1   | path:04145_2  | 0.005349 |
| SPI1   | path:04060_41 | 0.001532 |
| SPI1   | path:04650_10 | 0.008431 |
| SPI1   | path:04514_62 | 0.003571 |
| SPI1   | path:04670_2  | 0.000252 |
| SPI1   | path:04670_14 | 0.001532 |
| SPI1   | path:04670_10 | 0.003571 |
| SPI1   | path:04670_15 | 0.000961 |
| SREBF1 | path:04910_6  | 0.001432 |
| SREBF1 | path:00100_9  | 0.009883 |
| SREBF1 | path:04910_5  | 3.27E-05 |
| SREBF1 | path:03320_2  | 0.009883 |



|        |               |          |
|--------|---------------|----------|
| SRF    | path:05020_8  | 0.004546 |
| SRF    | path:05416_1  | 0.003034 |
| SRF    | path:05020_9  | 0.00379  |
| SRF    | path:05414_3  | 0.003034 |
| SRF    | path:05410_2  | 0.003034 |
| STAT1  | path:04620_9  | 0.00382  |
| STAT1  | path:04620_18 | 0.002114 |
| STAT1  | path:04620_22 | 0.00382  |
| STAT1  | path:05200_29 | 0.00382  |
| STAT1  | path:04620_16 | 0.002114 |
| STAT1  | path:04630_4  | 0.001501 |
| STAT1  | path:05210_10 | 0.001313 |
| STAT1  | path:04145_5  | 0.006088 |
| STAT1  | path:04630_3  | 0.006088 |
| STAT1  | path:04110_18 | 0.005143 |
| STAT1  | path:04620_17 | 0.00382  |
| STAT3  | path:04060_8  | 0.008398 |
| STAT3  | path:04630_4  | 5.36E-05 |
| STAT3  | path:04630_3  | 0.007945 |
| STAT3  | path:04060_3  | 0.007358 |
| STAT3  | path:04630_2  | 0.007945 |
| STAT3  | path:05142_4  | 0.000768 |
| STAT3  | path:05200_29 | 0.000109 |
| STAT4  | path:04630_4  | 0.000257 |
| STAT5A | path:04630_4  | 0.00037  |
| STAT5B | path:05200_52 | 0.005013 |
| STAT5B | path:05218_8  | 0.009061 |
| STAT5B | path:05214_15 | 0.002527 |
| STAT5B | path:05220_11 | 0.002527 |
| STAT5B | path:05220_9  | 0.002527 |
| STAT5B | path:05218_7  | 0.002527 |
| STAT5B | path:05214_14 | 0.002527 |
| STAT5B | path:05219_4  | 0.002527 |
| STAT5B | path:05200_47 | 0.002527 |

|        |               |          |
|--------|---------------|----------|
| STAT5B | path:04110_27 | 0.0095   |
| STAT5B | path:04630_4  | 0.00037  |
| STAT5B | path:05218_5  | 0.0095   |
| STAT5B | path:05214_13 | 0.002527 |
| STAT5B | path:05200_51 | 0.002527 |
| STAT5B | path:05200_29 | 0.0095   |
| STAT5B | path:05220_12 | 0.002527 |
| STAT5B | path:04110_20 | 0.0095   |
| STAT6  | path:04630_2  | 0.000657 |
| STAT6  | path:04630_4  | 0.000657 |
| STAT6  | path:00590_4  | 0.003995 |
| STAT6  | path:04630_3  | 0.000657 |
| TCF7   | path:04660_20 | 0.006692 |
| TCF7L2 | path:05200_31 | 4.20E-06 |
| TCF7L2 | path:05200_42 | 2.26E-05 |
| TCF7L2 | path:05222_2  | 0.003078 |
| TCF7L2 | path:04110_18 | 0.009975 |
| TCF7L2 | path:05222_1  | 0.003394 |
| TCF7L2 | path:04310_7  | 1.19E-09 |
| TCF7L2 | path:05216_4  | 4.20E-06 |
| TCF7L2 | path:05210_7  | 4.20E-06 |
| TCF7L2 | path:05200_50 | 0.00245  |
| TCF7L2 | path:05221_1  | 2.10E-05 |
| TCF7L2 | path:05215_4  | 0.002139 |
| TCF7L2 | path:05213_1  | 9.42E-06 |
| TCF7L2 | path:05210_12 | 4.20E-06 |
| TCF7L2 | path:05222_7  | 0.002763 |
| TCF7L2 | path:04630_1  | 0.008845 |
| TCF7L2 | path:05200_29 | 0.008546 |
| TCF7L2 | path:05210_10 | 0.00183  |
| TCF7L2 | path:04310_6  | 1.48E-08 |
| TFAP2A | path:05214_16 | 0.00774  |
| TFAP2A | path:05214_7  | 0.00774  |
| TFAP2A | path:05214_11 | 0.002408 |

|        |               |          |
|--------|---------------|----------|
| TFAP2A | path:05214_4  | 0.004059 |
| TFAP2A | path:05214_10 | 0.000317 |
| TFAP2A | path:04510_15 | 0.005458 |
| TFAP2A | path:04520_5  | 0.000575 |
| TFAP2A | path:05215_8  | 0.001125 |
| TFAP2A | path:05200_10 | 2.20E-05 |
| TFAP2A | path:04510_18 | 1.42E-05 |
| TFAP2A | path:04510_10 | 0.001269 |
| TFAP2A | path:04080_7  | 0.003857 |
| TFAP2A | path:04510_16 | 0.003333 |
| TFAP2A | path:04520_2  | 0.002408 |
| TFAP2A | path:04510_5  | 0.00774  |
| TFAP2A | path:05214_6  | 0.004059 |
| TFAP2A | path:05215_11 | 0.000437 |
| TFAP2A | path:05214_3  | 0.004059 |
| TFAP2A | path:04510_25 | 0.00774  |
| TFAP2A | path:05219_2  | 0.002408 |
| TFAP2A | path:04510_6  | 0.001276 |
| TFAP2A | path:05214_8  | 0.004059 |
| TFAP2A | path:05200_11 | 1.91E-05 |
| TFAP2A | path:05214_1  | 0.004059 |
| TFAP2A | path:04144_2  | 0.000575 |
| TFAP2A | path:05214_2  | 0.004059 |
| TFAP2A | path:05200_5  | 2.22E-05 |
| TFAP2A | path:05200_12 | 1.91E-05 |
| TFAP2A | path:04520_3  | 0.001263 |
| TFAP2A | path:05200_15 | 6.62E-06 |
| TFAP2A | path:05200_21 | 0.000449 |
| TFAP2A | path:04912_8  | 0.003857 |
| TFAP2A | path:04510_8  | 0.001272 |
| TFAP2A | path:05200_29 | 8.35E-05 |
| TFAP2A | path:05200_4  | 1.91E-05 |
| TFAP2A | path:05200_8  | 2.16E-06 |
| TFAP2A | path:05214_17 | 0.004059 |

|        |               |          |
|--------|---------------|----------|
| TFAP2A | path:05214_5  | 0.004059 |
| TFAP2A | path:05212_12 | 0.003333 |
| TFAP2A | path:04520_9  | 0.009047 |
| TFAP2A | path:04510_17 | 3.81E-05 |
| TFAP2A | path:05215_10 | 0.000317 |
| TFAP2A | path:04520_7  | 0.001263 |
| TFAP2A | path:04510_7  | 8.35E-05 |
| TFAP2A | path:05212_11 | 0.002699 |
| TFAP2A | path:04020_2  | 0.005724 |
| TFAP2C | path:05219_2  | 0.004045 |
| TFAP2C | path:04912_8  | 0.004045 |
| TFAP2C | path:04520_9  | 0.009425 |
| THRB   | path:04080_2  | 0.000625 |
| TP53   | path:04010_15 | 0.007703 |
| TP53   | path:04510_6  | 0.009577 |
| TP53   | path:05200_20 | 0.000117 |
| TP53   | path:04510_25 | 0.006952 |
| TP53   | path:05200_15 | 0.000968 |
| TP53   | path:04115_7  | 0        |
| TP53   | path:05160_15 | 0.009063 |
| TP53   | path:04210_23 | 0.000276 |
| TP53   | path:04110_23 | 0.000199 |
| TP53   | path:05200_48 | 1.95E-05 |
| TP53   | path:05214_10 | 0.000211 |
| TP53   | path:04010_21 | 0.007443 |
| TP53   | path:04110_22 | 7.56E-05 |
| TP53   | path:04110_8  | 0.004291 |
| TP53   | path:05218_8  | 0.001385 |
| TP53   | path:05200_5  | 0.000367 |
| TP53   | path:05220_12 | 0.000117 |
| TP53   | path:05215_11 | 0.000276 |
| TP53   | path:05200_11 | 0.000276 |
| TP53   | path:04210_20 | 0.000422 |
| TP53   | path:05200_8  | 1.95E-05 |

|      |               |          |
|------|---------------|----------|
| TP53 | path:05220_9  | 7.56E-05 |
| TP53 | path:05215_3  | 0.003315 |
| TP53 | path:05219_4  | 0.009063 |
| TP53 | path:04510_16 | 0.002467 |
| TP53 | path:05218_6  | 1.95E-05 |
| TP53 | path:05214_12 | 1.95E-05 |
| TP53 | path:04510_5  | 0.006952 |
| TP53 | path:05160_12 | 0.007459 |
| TP53 | path:05200_12 | 0.000276 |
| TP53 | path:04110_17 | 3.28E-07 |
| TP53 | path:04722_19 | 0.000218 |
| TP53 | path:04115_1  | 0        |
| TP53 | path:04110_4  | 0.004511 |
| TP53 | path:05014_4  | 0.009063 |
| TP53 | path:05214_4  | 0.003581 |
| TP53 | path:05214_13 | 0.000117 |
| TP53 | path:05215_10 | 0.004511 |
| TP53 | path:05200_51 | 0.000172 |
| TP53 | path:05214_1  | 0.003581 |
| TP53 | path:04510_17 | 0.000581 |
| TP53 | path:04510_7  | 0.001111 |
| TP53 | path:04012_12 | 0.002467 |
| TP53 | path:04110_7  | 4.42E-09 |
| TP53 | path:05218_5  | 0.001775 |
| TP53 | path:04115_3  | 0        |
| TP53 | path:05200_4  | 0.000276 |
| TP53 | path:04510_10 | 0.009132 |
| TP53 | path:04115_2  | 0        |
| TP53 | path:04110_27 | 0.001943 |
| TP53 | path:04912_8  | 0.002757 |
| TP53 | path:05218_2  | 0.002754 |
| TP53 | path:04510_15 | 0.004511 |
| TP53 | path:04010_16 | 0.009063 |
| TP53 | path:05214_11 | 0.001775 |

|      |               |          |
|------|---------------|----------|
| TP53 | path:04110_19 | 1.48E-05 |
| TP53 | path:04115_4  | 0        |
| TP53 | path:05219_3  | 0.001692 |
| TP53 | path:04110_20 | 0.001943 |
| TP53 | path:05200_47 | 7.56E-05 |
| TP53 | path:05200_10 | 0.000338 |
| TP53 | path:04110_1  | 2.55E-11 |
| TP53 | path:04510_8  | 0.009353 |
| TP53 | path:05213_2  | 0.007459 |
| TP53 | path:04621_7  | 0.009063 |
| TP53 | path:05200_17 | 0.003927 |
| TP53 | path:05214_14 | 7.56E-05 |
| TP53 | path:05220_8  | 1.95E-05 |
| TP53 | path:04510_18 | 0.001775 |
| TP53 | path:05200_19 | 0.002998 |
| TP53 | path:04110_3  | 0.000211 |
| TP53 | path:04210_24 | 0.000276 |
| TP63 | path:04115_1  | 8.12E-05 |
| TP63 | path:05220_9  | 0.000159 |
| TP63 | path:04110_7  | 8.12E-05 |
| TP63 | path:05215_11 | 0.004121 |
| TP63 | path:04115_7  | 8.12E-05 |
| TP63 | path:04110_1  | 2.23E-05 |
| TP63 | path:05200_48 | 8.12E-05 |
| TP63 | path:05214_12 | 8.12E-05 |
| TP63 | path:05218_6  | 8.12E-05 |
| TP63 | path:05200_20 | 0.002783 |
| TP63 | path:05200_19 | 0.002783 |
| TP63 | path:04115_4  | 8.12E-05 |
| TP63 | path:04115_3  | 8.12E-05 |
| TP63 | path:05215_3  | 0.002837 |
| TP63 | path:05220_8  | 8.12E-05 |
| TP63 | path:05200_17 | 0.003116 |
| TP63 | path:04115_2  | 8.12E-05 |

|      |               |          |
|------|---------------|----------|
| TP63 | path:05200_47 | 0.000159 |
| TP63 | path:05214_14 | 0.000159 |
| TP73 | path:04115_1  | 6.75E-05 |
| TP73 | path:04722_19 | 0.000595 |
| TP73 | path:04115_4  | 6.67E-05 |
| TP73 | path:04115_2  | 6.67E-05 |
| TP73 | path:04115_3  | 6.67E-05 |
| TP73 | path:04115_7  | 6.67E-05 |
| VDR  | path:00591_1  | 0.008772 |
| VDR  | path:00140_11 | 0.008772 |
| VDR  | path:05214_10 | 0.009416 |
| VDR  | path:00982_2  | 0.003675 |
| VDR  | path:00140_1  | 0.009787 |
| VDR  | path:00980_2  | 0.009737 |
| VDR  | path:05214_1  | 0.008772 |
| VDR  | path:00982_7  | 0.001636 |
| VDR  | path:05214_3  | 0.008772 |
| VDR  | path:05200_9  | 0.008772 |
| VDR  | path:00140_26 | 0.009787 |
| VDR  | path:00982_10 | 0.004788 |
| VDR  | path:00982_9  | 0.003361 |
| VDR  | path:00140_25 | 0.009787 |
| VDR  | path:05218_2  | 0.008772 |
| VDR  | path:05214_4  | 0.008772 |
| VDR  | path:00982_8  | 0.001636 |
| VDR  | path:04012_14 | 0.009094 |
| VDR  | path:04012_11 | 0.008772 |
| VDR  | path:00982_5  | 0.003361 |
| VDR  | path:05223_6  | 0.008772 |
| VDR  | path:05215_11 | 0.009787 |
| VDR  | path:04012_4  | 0.008772 |
| VDR  | path:00982_4  | 0.003361 |
| VDR  | path:05214_8  | 0.008772 |
| VDR  | path:05214_5  | 0.008772 |

|      |               |          |
|------|---------------|----------|
| VDR  | path:05214_17 | 0.008772 |
| VDR  | path:04012_7  | 0.008772 |
| VDR  | path:04012_12 | 0.008772 |
| VDR  | path:00982_3  | 0.001636 |
| VDR  | path:00982_6  | 0.008772 |
| VDR  | path:00982_11 | 0.001636 |
| VDR  | path:05214_2  | 0.008772 |
| VDR  | path:04012_1  | 0.008772 |
| VDR  | path:05214_6  | 0.008772 |
| XBP1 | path:05320_4  | 0.000179 |
| XBP1 | path:05330_7  | 0.000327 |
| XBP1 | path:04672_4  | 0.000179 |
| XBP1 | path:05310_1  | 0.000179 |
| XBP1 | path:05416_4  | 0.000179 |
| XBP1 | path:04940_1  | 0.000179 |
| XBP1 | path:05322_5  | 0.000179 |
| XBP1 | path:04672_5  | 0.000179 |
| XBP1 | path:05332_1  | 0.000179 |
| XBP1 | path:05330_2  | 0.000179 |
| XBP1 | path:05320_6  | 0.000179 |
| XBP1 | path:05150_14 | 0.000179 |
| XBP1 | path:05310_3  | 0.000179 |
| XBP1 | path:04514_3  | 0.000179 |
| XBP1 | path:05322_6  | 0.000179 |
| XBP1 | path:05320_1  | 0.000179 |
| XBP1 | path:04612_3  | 0.000179 |
| XBP1 | path:04514_1  | 0.000179 |
| XBP1 | path:05320_3  | 0.000179 |
| XBP1 | path:05330_1  | 0.000179 |
| XBP1 | path:05330_4  | 0.000179 |
| YY1  | path:00140_4  | 0.009418 |
| YY1  | path:05219_4  | 0.009418 |
| YY1  | path:05214_15 | 0.009975 |
| YY1  | path:00140_16 | 0.009418 |



|     |               |          |
|-----|---------------|----------|
| YY1 | path:00140_13 | 0.009975 |
| YY1 | path:05214_13 | 0.000411 |
| YY1 | path:00140_18 | 0.009418 |
| YY1 | path:00140_8  | 0.007589 |
| YY1 | path:05223_3  | 0.009418 |
| YY1 | path:00140_19 | 0.009975 |
| YY1 | path:05214_14 | 0.007589 |
| YY1 | path:00140_10 | 0.009418 |
| YY1 | path:05212_13 | 0.009418 |
| YY1 | path:04110_23 | 0.005923 |
| YY1 | path:05200_48 | 0.005152 |
| YY1 | path:00140_7  | 0.009975 |
| YY1 | path:00140_9  | 0.007589 |
| YY1 | path:00140_3  | 0.009418 |
| YY1 | path:05200_47 | 0.007589 |
| YY1 | path:05220_9  | 0.007589 |
| YY1 | path:04115_4  | 0.009975 |
| YY1 | path:04110_20 | 0.003726 |
| YY1 | path:00140_20 | 0.009418 |
| YY1 | path:00140_14 | 0.007589 |
| YY1 | path:04110_19 | 0.000476 |
| YY1 | path:04110_7  | 0.007589 |
| YY1 | path:05218_7  | 0.009975 |
| YY1 | path:04110_17 | 0.000486 |
| YY1 | path:04650_7  | 0.009418 |
| YY1 | path:05200_51 | 0.000438 |
| YY1 | path:05218_8  | 0.003139 |
| YY1 | path:05219_3  | 0.003726 |
| YY1 | path:05210_10 | 0.009418 |
| YY1 | path:05220_11 | 0.009975 |
| YY1 | path:05214_12 | 0.005152 |
| YY1 | path:05218_6  | 0.005152 |
| YY1 | path:04650_20 | 0.007431 |
| YY1 | path:05220_8  | 0.005152 |

|        |               |          |
|--------|---------------|----------|
| YY1    | path:05220_12 | 0.000411 |
| YY1    | path:04110_27 | 0.003726 |
| ZBTB7A | path:04110_22 | 0.001224 |
| ZBTB7A | path:04110_18 | 0.001519 |
| ZBTB7A | path:05200_52 | 0.000644 |
| ZBTB7A | path:04350_6  | 0.000801 |
| ZBTB7A | path:04110_25 | 7.64E-06 |
| ZBTB7A | path:05218_7  | 0.000397 |
| ZBTB7A | path:04110_4  | 0.001957 |
| ZBTB7A | path:04110_1  | 0.001011 |
| ZBTB7A | path:04110_23 | 0.001957 |
| ZBTB7A | path:04110_20 | 0.001224 |
| ZBTB7A | path:04110_26 | 0.001957 |
| ZBTB7A | path:04110_3  | 0.001957 |
| ZBTB7A | path:05214_13 | 0.000397 |
| ZBTB7A | path:05220_11 | 0.000397 |
| ZBTB7A | path:05222_2  | 0.000644 |
| ZBTB7A | path:04110_27 | 9.07E-06 |
| ZBTB7A | path:04110_19 | 0.002272 |
| ZBTB7A | path:04110_17 | 0.002453 |
| ZBTB7A | path:05218_8  | 0.001011 |
| ZBTB7A | path:05214_15 | 0.000397 |
| ZBTB7A | path:05219_4  | 0.000397 |
| ZBTB7A | path:05200_51 | 0.000397 |
| ZBTB7A | path:05222_1  | 0.000644 |
| ZBTB7A | path:05220_12 | 0.000397 |
| ZBTB7B | path:04510_8  | 0.00284  |
| ZBTB7B | path:04512_5  | 0.000476 |
| ZBTB7B | path:05146_9  | 0.000424 |
| ZBTB7B | path:04512_9  | 0.000537 |
| ZBTB7B | path:04512_10 | 0.000476 |
| ZBTB7B | path:04512_14 | 0.000424 |
| ZBTB7B | path:04512_3  | 0.000476 |
| ZBTB7B | path:04510_10 | 0.00284  |

|        |               |          |
|--------|---------------|----------|
| ZBTB7B | path:04512_11 | 0.000424 |
| ZBTB7B | path:04512_12 | 0.000476 |
| ZBTB7B | path:04510_19 | 0.00284  |
| ZBTB7B | path:04510_1  | 0.00284  |
| ZBTB7B | path:04510_6  | 0.00284  |
| ZBTB7B | path:05146_1  | 0.000476 |
| ZBTB7B | path:04512_13 | 0.000424 |
| ZBTB7B | path:04512_6  | 0.000521 |
| ZBTB7B | path:05146_2  | 0.000476 |
| ZBTB7B | path:04512_27 | 0.000476 |

---

**Table S4. The detailed information of the co-family TFs regulated sub-pathways.**

| <b>Family</b>          | <b>TF</b> | <b>Subpathway</b> | <b>P_Value</b> |
|------------------------|-----------|-------------------|----------------|
| AP-1(-like) components | ATF2      | path:00140_18     | 0.006675857    |
| AP-1(-like) components | ATF2      | path:00140_5      | 0.009108588    |
| AP-1(-like) components | ATF2      | path:00140_7      | 0.008207011    |
| AP-1(-like) components | ATF2      | path:00140_8      | 0.005778895    |
| AP-1(-like) components | ATF2      | path:00140_9      | 0.005778895    |
| AP-1(-like) components | ATF2      | path:04110_16     | 0.009108588    |
| AP-1(-like) components | ATF2      | path:04110_17     | 0.004619377    |
| AP-1(-like) components | ATF2      | path:04110_18     | 0.003077219    |
| AP-1(-like) components | ATF2      | path:04110_19     | 0.004580141    |
| AP-1(-like) components | ATF2      | path:04110_23     | 0.004084659    |
| AP-1(-like) components | ATF2      | path:04110_26     | 0.004084659    |
| AP-1(-like) components | ATF2      | path:04110_3      | 0.004084659    |
| AP-1(-like) components | ATF2      | path:04110_4      | 0.004084659    |
| AP-1(-like) components | ATF2      | path:04612_7      | 0.004580141    |
| AP-1(-like) components | ATF2      | path:04620_12     | 0.000407893    |
| AP-1(-like) components | ATF2      | path:04620_16     | 0.000747082    |
| AP-1(-like) components | ATF2      | path:04620_17     | 3.02E-05       |
| AP-1(-like) components | ATF2      | path:04620_18     | 1.46E-05       |
| AP-1(-like) components | ATF2      | path:04620_22     | 3.02E-05       |
| AP-1(-like) components | ATF2      | path:04620_9      | 3.02E-05       |
| AP-1(-like) components | ATF2      | path:04650_20     | 0.004580141    |
| AP-1(-like) components | ATF2      | path:05020_9      | 0.004580141    |
| AP-1(-like) components | ATF2      | path:05142_10     | 0.009108588    |
| AP-1(-like) components | ATF2      | path:05142_4      | 0.009108588    |
| AP-1(-like) components | ATF2      | path:05200_29     | 0.002319558    |
| AP-1(-like) components | ATF2      | path:05200_51     | 0.007303382    |
| AP-1(-like) components | ATF2      | path:05210_10     | 0.007303382    |
| AP-1(-like) components | ATF2      | path:05212_13     | 0.007303382    |
| AP-1(-like) components | ATF2      | path:05214_13     | 0.006675857    |
| AP-1(-like) components | ATF2      | path:05214_15     | 0.008207011    |
| AP-1(-like) components | ATF2      | path:05214_21     | 0.006675857    |
| AP-1(-like) components | ATF2      | path:05218_7      | 0.008207011    |
| AP-1(-like) components | ATF2      | path:05219_4      | 0.007303382    |

|                        |      |               |             |
|------------------------|------|---------------|-------------|
| AP-1(-like) components | ATF2 | path:05220_11 | 0.008207011 |
| AP-1(-like) components | ATF2 | path:05220_12 | 0.006675857 |
| AP-1(-like) components | ATF2 | path:05223_3  | 0.007303382 |
| AP-1(-like) components | FOS  | path:04115_1  | 0.005719136 |
| AP-1(-like) components | FOS  | path:04310_7  | 0.006308233 |
| AP-1(-like) components | FOS  | path:04610_7  | 0.003173805 |
| AP-1(-like) components | FOS  | path:04620_17 | 0.006237239 |
| AP-1(-like) components | FOS  | path:04620_18 | 0.003173805 |
| AP-1(-like) components | FOS  | path:04620_22 | 0.006237239 |
| AP-1(-like) components | FOS  | path:04620_9  | 0.006237239 |
| AP-1(-like) components | FOS  | path:05200_29 | 2.16E-08    |
| AP-1(-like) components | JUN  | path:04115_1  | 0.001389686 |
| AP-1(-like) components | JUN  | path:04115_2  | 0.008970954 |
| AP-1(-like) components | JUN  | path:04115_3  | 0.007635426 |
| AP-1(-like) components | JUN  | path:04115_4  | 0.007635426 |
| AP-1(-like) components | JUN  | path:04115_7  | 0.007953336 |
| AP-1(-like) components | JUN  | path:04210_24 | 0.002648312 |
| AP-1(-like) components | JUN  | path:04310_6  | 0.004858763 |
| AP-1(-like) components | JUN  | path:04310_7  | 0.000877028 |
| AP-1(-like) components | JUN  | path:04512_23 | 0.007569048 |
| AP-1(-like) components | JUN  | path:04610_7  | 0.002952732 |
| AP-1(-like) components | JUN  | path:04620_12 | 6.18E-05    |
| AP-1(-like) components | JUN  | path:04620_16 | 0.000158904 |
| AP-1(-like) components | JUN  | path:04620_17 | 2.03E-05    |
| AP-1(-like) components | JUN  | path:04620_18 | 6.60E-06    |
| AP-1(-like) components | JUN  | path:04620_22 | 2.03E-05    |
| AP-1(-like) components | JUN  | path:04620_9  | 2.03E-05    |
| AP-1(-like) components | JUN  | path:04650_20 | 0.000308777 |
| AP-1(-like) components | JUN  | path:04940_4  | 0.002952732 |
| AP-1(-like) components | JUN  | path:05120_6  | 0.002952732 |
| AP-1(-like) components | JUN  | path:05131_6  | 0.007569048 |
| AP-1(-like) components | JUN  | path:05200_29 | 2.03E-05    |
| AP-1(-like) components | JUN  | path:05320_9  | 0.002952732 |
| AP-1(-like) components | JUN  | path:05330_5  | 0.002952732 |

|                        |        |               |             |
|------------------------|--------|---------------|-------------|
| AP-1(-like) components | JUN    | path:05332_2  | 0.002952732 |
| AP-1(-like) components | JUN    | path:05332_5  | 0.002952732 |
| AP-1(-like) components | JUNB   | path:04350_10 | 0.002723194 |
| AP-1(-like) components | JUNB   | path:04350_12 | 0.002723194 |
| AP-1(-like) components | JUND   | path:05200_29 | 6.84E-09    |
| AP-1(-like) components | NFE2L2 | path:00480_1  | 0.003129559 |
| AP-1(-like) components | NFE2L2 | path:00480_2  | 2.02E-06    |
| AP-1(-like) components | NFE2L2 | path:00480_3  | 0.003129559 |
| AP-1(-like) components | NFE2L2 | path:00480_4  | 0.003129559 |
| AP-1(-like) components | NFE2L2 | path:00480_5  | 0.003129559 |
| AP-1(-like) components | NFE2L2 | path:00480_6  | 0.003129559 |
| AP-1(-like) components | NRL    | path:04744_2  | 0.00090302  |
| AP-1(-like) components | XBP1   | path:04514_1  | 0.000178543 |
| AP-1(-like) components | XBP1   | path:04514_3  | 0.000178543 |
| AP-1(-like) components | XBP1   | path:04612_3  | 0.000178543 |
| AP-1(-like) components | XBP1   | path:04672_4  | 0.000178543 |
| AP-1(-like) components | XBP1   | path:04672_5  | 0.000178543 |
| AP-1(-like) components | XBP1   | path:04940_1  | 0.000178543 |
| AP-1(-like) components | XBP1   | path:05150_14 | 0.000178543 |
| AP-1(-like) components | XBP1   | path:05310_1  | 0.000178543 |
| AP-1(-like) components | XBP1   | path:05310_3  | 0.000178543 |
| AP-1(-like) components | XBP1   | path:05320_1  | 0.000178543 |
| AP-1(-like) components | XBP1   | path:05320_3  | 0.000178543 |
| AP-1(-like) components | XBP1   | path:05320_4  | 0.000178543 |
| AP-1(-like) components | XBP1   | path:05320_6  | 0.000178543 |
| AP-1(-like) components | XBP1   | path:05322_5  | 0.000178543 |
| AP-1(-like) components | XBP1   | path:05322_6  | 0.000178543 |
| AP-1(-like) components | XBP1   | path:05330_1  | 0.000178543 |
| AP-1(-like) components | XBP1   | path:05330_2  | 0.000178543 |
| AP-1(-like) components | XBP1   | path:05330_4  | 0.000178543 |
| AP-1(-like) components | XBP1   | path:05330_7  | 0.000327268 |
| AP-1(-like) components | XBP1   | path:05332_1  | 0.000178543 |
| AP-1(-like) components | XBP1   | path:05416_4  | 0.000178543 |
| AP-2                   | TFAP2A | path:04020_2  | 0.005723968 |

|      |        |               |             |
|------|--------|---------------|-------------|
| AP-2 | TFAP2A | path:04080_7  | 0.003857334 |
| AP-2 | TFAP2A | path:04144_2  | 0.00057548  |
| AP-2 | TFAP2A | path:04510_10 | 0.001269093 |
| AP-2 | TFAP2A | path:04510_15 | 0.005458314 |
| AP-2 | TFAP2A | path:04510_16 | 0.003332624 |
| AP-2 | TFAP2A | path:04510_17 | 3.81E-05    |
| AP-2 | TFAP2A | path:04510_18 | 1.42E-05    |
| AP-2 | TFAP2A | path:04510_25 | 0.007739985 |
| AP-2 | TFAP2A | path:04510_5  | 0.007739985 |
| AP-2 | TFAP2A | path:04510_6  | 0.001276164 |
| AP-2 | TFAP2A | path:04510_7  | 8.35E-05    |
| AP-2 | TFAP2A | path:04510_8  | 0.001271633 |
| AP-2 | TFAP2A | path:04520_2  | 0.002407854 |
| AP-2 | TFAP2A | path:04520_3  | 0.001262516 |
| AP-2 | TFAP2A | path:04520_5  | 0.00057548  |
| AP-2 | TFAP2A | path:04520_7  | 0.001262516 |
| AP-2 | TFAP2A | path:04520_9  | 0.009046641 |
| AP-2 | TFAP2A | path:04912_8  | 0.003857334 |
| AP-2 | TFAP2A | path:05200_10 | 2.20E-05    |
| AP-2 | TFAP2A | path:05200_11 | 1.91E-05    |
| AP-2 | TFAP2A | path:05200_12 | 1.91E-05    |
| AP-2 | TFAP2A | path:05200_15 | 6.62E-06    |
| AP-2 | TFAP2A | path:05200_21 | 0.000448647 |
| AP-2 | TFAP2A | path:05200_29 | 8.35E-05    |
| AP-2 | TFAP2A | path:05200_4  | 1.91E-05    |
| AP-2 | TFAP2A | path:05200_5  | 2.22E-05    |
| AP-2 | TFAP2A | path:05200_8  | 2.16E-06    |
| AP-2 | TFAP2A | path:05212_11 | 0.002699451 |
| AP-2 | TFAP2A | path:05212_12 | 0.003332624 |
| AP-2 | TFAP2A | path:05214_1  | 0.004058678 |
| AP-2 | TFAP2A | path:05214_10 | 0.000317116 |
| AP-2 | TFAP2A | path:05214_11 | 0.002407854 |
| AP-2 | TFAP2A | path:05214_16 | 0.007739985 |
| AP-2 | TFAP2A | path:05214_17 | 0.004058678 |

|                                |        |               |             |
|--------------------------------|--------|---------------|-------------|
| AP-2                           | TFAP2A | path:05214_2  | 0.004058678 |
| AP-2                           | TFAP2A | path:05214_3  | 0.004058678 |
| AP-2                           | TFAP2A | path:05214_4  | 0.004058678 |
| AP-2                           | TFAP2A | path:05214_5  | 0.004058678 |
| AP-2                           | TFAP2A | path:05214_6  | 0.004058678 |
| AP-2                           | TFAP2A | path:05214_7  | 0.007739985 |
| AP-2                           | TFAP2A | path:05214_8  | 0.004058678 |
| AP-2                           | TFAP2A | path:05215_10 | 0.000317116 |
| AP-2                           | TFAP2A | path:05215_11 | 0.000436788 |
| AP-2                           | TFAP2A | path:05215_8  | 0.001124594 |
| AP-2                           | TFAP2A | path:05219_2  | 0.002407854 |
| AP-2                           | TFAP2C | path:04520_9  | 0.009425324 |
| AP-2                           | TFAP2C | path:04912_8  | 0.00404499  |
| AP-2                           | TFAP2C | path:05219_2  | 0.00404499  |
| C/EBP-like factors             | CEBPA  | path:04060_54 | 0.0042174   |
| C/EBP-like factors             | CEBPA  | path:04610_3  | 0.00918123  |
| C/EBP-like factors             | CEBPA  | path:04610_4  | 0.00018207  |
| C/EBP-like factors             | CEBPA  | path:04610_6  | 0.00018207  |
| C/EBP-like factors             | CEBPB  | path:04060_56 | 1.23E-05    |
| C/EBP-like factors             | CEBPB  | path:04062_1  | 0.000853445 |
| C/EBP-like factors             | CEBPB  | path:04062_2  | 0.000193217 |
| C/EBP-like factors             | CEBPB  | path:04620_12 | 6.69E-07    |
| C/EBP-like factors             | CEBPB  | path:04620_16 | 9.58E-07    |
| C/EBP-like factors             | CEBPB  | path:04620_17 | 4.38E-06    |
| C/EBP-like factors             | CEBPB  | path:04620_18 | 9.27E-07    |
| C/EBP-like factors             | CEBPB  | path:04620_22 | 4.38E-06    |
| C/EBP-like factors             | CEBPB  | path:04620_9  | 4.77E-06    |
| Cell-cycle controlling factors | E2F1   | path:04110_1  | 0.000197534 |
| Cell-cycle controlling factors | E2F1   | path:04110_15 | 0.008121608 |
| Cell-cycle controlling factors | E2F1   | path:04110_16 | 0.006872543 |
| Cell-cycle controlling factors | E2F1   | path:04110_17 | 9.20E-09    |
| Cell-cycle controlling factors | E2F1   | path:04110_19 | 1.74E-07    |
| Cell-cycle controlling factors | E2F1   | path:04110_20 | 2.73E-06    |
| Cell-cycle controlling factors | E2F1   | path:04110_22 | 0.000308684 |



|                                |      |               |             |
|--------------------------------|------|---------------|-------------|
| Cell-cycle controlling factors | E2F1 | path:04110_23 | 1.13E-07    |
| Cell-cycle controlling factors | E2F1 | path:04110_26 | 1.13E-07    |
| Cell-cycle controlling factors | E2F1 | path:04110_27 | 2.73E-06    |
| Cell-cycle controlling factors | E2F1 | path:04110_3  | 1.13E-07    |
| Cell-cycle controlling factors | E2F1 | path:04110_4  | 1.13E-07    |
| Cell-cycle controlling factors | E2F1 | path:04110_7  | 1.74E-05    |
| Cell-cycle controlling factors | E2F1 | path:04115_1  | 0.00499983  |
| Cell-cycle controlling factors | E2F1 | path:04510_11 | 0.009147152 |
| Cell-cycle controlling factors | E2F1 | path:05014_4  | 0.004589831 |
| Cell-cycle controlling factors | E2F1 | path:05200_51 | 1.56E-05    |
| Cell-cycle controlling factors | E2F1 | path:05200_52 | 9.20E-09    |
| Cell-cycle controlling factors | E2F1 | path:05200_53 | 1.85E-07    |
| Cell-cycle controlling factors | E2F1 | path:05200_54 | 0.002554435 |
| Cell-cycle controlling factors | E2F1 | path:05212_13 | 1.10E-07    |
| Cell-cycle controlling factors | E2F1 | path:05214_13 | 1.07E-05    |
| Cell-cycle controlling factors | E2F1 | path:05214_15 | 1.13E-07    |
| Cell-cycle controlling factors | E2F1 | path:05214_21 | 1.07E-05    |
| Cell-cycle controlling factors | E2F1 | path:05215_7  | 1.56E-05    |
| Cell-cycle controlling factors | E2F1 | path:05218_7  | 1.13E-07    |
| Cell-cycle controlling factors | E2F1 | path:05218_8  | 0.000197534 |
| Cell-cycle controlling factors | E2F1 | path:05219_4  | 1.10E-07    |
| Cell-cycle controlling factors | E2F1 | path:05220_11 | 1.13E-07    |
| Cell-cycle controlling factors | E2F1 | path:05220_12 | 1.07E-05    |
| Cell-cycle controlling factors | E2F1 | path:05222_1  | 3.73E-07    |
| Cell-cycle controlling factors | E2F1 | path:05222_2  | 0.009147152 |
| Cell-cycle controlling factors | E2F1 | path:05223_3  | 1.10E-07    |
| Cell-cycle controlling factors | MYC  | path:04110_17 | 0.000714486 |
| Cell-cycle controlling factors | MYC  | path:04110_18 | 0.00038916  |
| Cell-cycle controlling factors | MYC  | path:04110_20 | 0.000292768 |
| Cell-cycle controlling factors | MYC  | path:04110_22 | 0.009112071 |
| Cell-cycle controlling factors | MYC  | path:04110_23 | 0.000518594 |
| Cell-cycle controlling factors | MYC  | path:04110_26 | 0.000518594 |
| Cell-cycle controlling factors | MYC  | path:04110_27 | 0.000292768 |
| Cell-cycle controlling factors | MYC  | path:04110_3  | 0.000518594 |

|                                |     |               |             |
|--------------------------------|-----|---------------|-------------|
| Cell-cycle controlling factors | MYC | path:04110_4  | 0.000518594 |
| Cell-cycle controlling factors | MYC | path:04110_7  | 0.000714486 |
| Cell-cycle controlling factors | MYC | path:04310_7  | 0.009572529 |
| Cell-cycle controlling factors | MYC | path:04630_1  | 0.009572529 |
| Cell-cycle controlling factors | MYC | path:05200_21 | 0.002484447 |
| Cell-cycle controlling factors | MYC | path:05200_29 | 7.20E-06    |
| Cell-cycle controlling factors | MYC | path:05200_31 | 0.002048915 |
| Cell-cycle controlling factors | MYC | path:05200_42 | 0.006520738 |
| Cell-cycle controlling factors | MYC | path:05200_47 | 0.00165995  |
| Cell-cycle controlling factors | MYC | path:05200_50 | 8.52E-05    |
| Cell-cycle controlling factors | MYC | path:05200_51 | 0.002023761 |
| Cell-cycle controlling factors | MYC | path:05200_52 | 0.003950679 |
| Cell-cycle controlling factors | MYC | path:05200_53 | 0.002948165 |
| Cell-cycle controlling factors | MYC | path:05210_10 | 0.002023761 |
| Cell-cycle controlling factors | MYC | path:05210_12 | 0.002048915 |
| Cell-cycle controlling factors | MYC | path:05210_7  | 0.002048915 |
| Cell-cycle controlling factors | MYC | path:05212_11 | 0.009112071 |
| Cell-cycle controlling factors | MYC | path:05212_13 | 0.002023761 |
| Cell-cycle controlling factors | MYC | path:05213_1  | 0.003437632 |
| Cell-cycle controlling factors | MYC | path:05214_13 | 0.001974254 |
| Cell-cycle controlling factors | MYC | path:05214_14 | 0.00165995  |
| Cell-cycle controlling factors | MYC | path:05214_15 | 0.002048915 |
| Cell-cycle controlling factors | MYC | path:05214_21 | 0.001974254 |
| Cell-cycle controlling factors | MYC | path:05216_4  | 0.002023761 |
| Cell-cycle controlling factors | MYC | path:05218_3  | 0.002048915 |
| Cell-cycle controlling factors | MYC | path:05218_5  | 0.008651174 |
| Cell-cycle controlling factors | MYC | path:05218_7  | 0.002048915 |
| Cell-cycle controlling factors | MYC | path:05218_8  | 0.007148499 |
| Cell-cycle controlling factors | MYC | path:05219_4  | 0.002023761 |
| Cell-cycle controlling factors | MYC | path:05220_11 | 0.002048915 |
| Cell-cycle controlling factors | MYC | path:05220_12 | 0.001974254 |
| Cell-cycle controlling factors | MYC | path:05220_9  | 0.00165995  |
| Cell-cycle controlling factors | MYC | path:05221_1  | 0.005908255 |
| Cell-cycle controlling factors | MYC | path:05222_1  | 8.86E-05    |

|                                |       |               |             |
|--------------------------------|-------|---------------|-------------|
| Cell-cycle controlling factors | MYC   | path:05222_2  | 8.52E-05    |
| Cell-cycle controlling factors | MYC   | path:05222_7  | 8.52E-05    |
| Cell-cycle controlling factors | MYC   | path:05223_3  | 0.002023761 |
| CREB                           | ATF1  | path:04110_18 | 0.009914183 |
| CREB                           | CREB1 | path:04514_1  | 0.004288489 |
| CREB                           | CREB1 | path:04514_3  | 0.004288489 |
| CREB                           | CREB1 | path:04612_3  | 0.004288489 |
| CREB                           | CREB1 | path:04620_12 | 0.004131401 |
| CREB                           | CREB1 | path:04620_16 | 0.004131401 |
| CREB                           | CREB1 | path:04620_17 | 0.001277819 |
| CREB                           | CREB1 | path:04620_18 | 0.000627719 |
| CREB                           | CREB1 | path:04620_22 | 0.001277819 |
| CREB                           | CREB1 | path:04620_9  | 0.001277819 |
| CREB                           | CREB1 | path:04672_4  | 0.004131401 |
| CREB                           | CREB1 | path:04672_5  | 0.004131401 |
| CREB                           | CREB1 | path:04940_1  | 0.004131401 |
| CREB                           | CREB1 | path:05150_14 | 0.004288489 |
| CREB                           | CREB1 | path:05200_18 | 0.009649083 |
| CREB                           | CREB1 | path:05310_1  | 0.004131401 |
| CREB                           | CREB1 | path:05310_3  | 0.004131401 |
| CREB                           | CREB1 | path:05320_1  | 0.004131401 |
| CREB                           | CREB1 | path:05320_3  | 0.004131401 |
| CREB                           | CREB1 | path:05320_4  | 0.004131401 |
| CREB                           | CREB1 | path:05320_6  | 0.004131401 |
| CREB                           | CREB1 | path:05322_5  | 0.004131401 |
| CREB                           | CREB1 | path:05322_6  | 0.004131401 |
| CREB                           | CREB1 | path:05330_1  | 0.004131401 |
| CREB                           | CREB1 | path:05330_2  | 0.004131401 |
| CREB                           | CREB1 | path:05330_4  | 0.004131401 |
| CREB                           | CREB1 | path:05332_1  | 0.004131401 |
| CREB                           | CREB1 | path:05416_4  | 0.004131401 |
| CREB                           | CREM  | path:05200_29 | 0.000820491 |
| csd                            | YBX1  | path:04012_5  | 0.007005212 |
| csd                            | YBX1  | path:04510_10 | 0.005634473 |

|     |      |               |             |
|-----|------|---------------|-------------|
| csd | YBX1 | path:04510_15 | 0.000802879 |
| csd | YBX1 | path:04510_16 | 0.00062354  |
| csd | YBX1 | path:04510_17 | 0.001170159 |
| csd | YBX1 | path:04510_18 | 0.002082955 |
| csd | YBX1 | path:04510_25 | 0.000802879 |
| csd | YBX1 | path:04510_5  | 0.000802879 |
| csd | YBX1 | path:04510_6  | 0.005634473 |
| csd | YBX1 | path:04510_7  | 0.001493429 |
| csd | YBX1 | path:04510_8  | 0.005634473 |
| csd | YBX1 | path:04520_2  | 0.007005212 |
| csd | YBX1 | path:04520_3  | 0.005634473 |
| csd | YBX1 | path:04520_5  | 0.005634473 |
| csd | YBX1 | path:04520_7  | 0.005634473 |
| csd | YBX1 | path:04810_32 | 0.009732845 |
| csd | YBX1 | path:04910_2  | 0.008638548 |
| csd | YBX1 | path:05100_15 | 0.005634473 |
| csd | YBX1 | path:05100_2  | 0.005634473 |
| csd | YBX1 | path:05200_6  | 0.009732845 |
| csd | YBX1 | path:05200_9  | 0.005634473 |
| csd | YBX1 | path:05211_1  | 0.005634473 |
| csd | YBX1 | path:05211_2  | 0.005634473 |
| csd | YBX1 | path:05211_7  | 0.005634473 |
| csd | YBX1 | path:05211_8  | 0.005634473 |
| csd | YBX1 | path:05212_1  | 0.00609256  |
| csd | YBX1 | path:05212_11 | 0.007005212 |
| csd | YBX1 | path:05212_12 | 0.008169375 |
| csd | YBX1 | path:05213_6  | 0.005634473 |
| csd | YBX1 | path:05214_1  | 0.008831833 |
| csd | YBX1 | path:05214_10 | 0.009960619 |
| csd | YBX1 | path:05214_11 | 0.007005212 |
| csd | YBX1 | path:05214_17 | 0.008831833 |
| csd | YBX1 | path:05214_2  | 0.008831833 |
| csd | YBX1 | path:05214_3  | 0.008831833 |
| csd | YBX1 | path:05214_4  | 0.008831833 |

|                                       |      |               |             |
|---------------------------------------|------|---------------|-------------|
| csd                                   | YBX1 | path:05214_5  | 0.008831833 |
| csd                                   | YBX1 | path:05214_6  | 0.008831833 |
| csd                                   | YBX1 | path:05214_8  | 0.008831833 |
| csd                                   | YBX1 | path:05215_10 | 0.009960619 |
| csd                                   | YBX1 | path:05218_2  | 0.00062354  |
| csd                                   | YBX1 | path:05218_4  | 0.001493429 |
| csd                                   | YBX1 | path:05223_5  | 0.005634473 |
| csd                                   | YBX1 | path:05223_6  | 0.007005212 |
| csd                                   | YBX1 | path:05223_7  | 0.005634473 |
| Developmental / cell cycle regulators | EGR1 | path:04060_8  | 0.009869535 |
| Developmental / cell cycle regulators | EGR1 | path:04510_10 | 0.00069989  |
| Developmental / cell cycle regulators | EGR1 | path:04510_18 | 0.00069989  |
| Developmental / cell cycle regulators | EGR1 | path:04510_6  | 0.003153788 |
| Developmental / cell cycle regulators | EGR1 | path:04510_8  | 0.003153788 |
| Developmental / cell cycle regulators | EGR1 | path:04512_3  | 0.00129686  |
| Developmental / cell cycle regulators | EGR1 | path:04540_13 | 0.003153788 |
| Developmental / cell cycle regulators | EGR1 | path:05146_9  | 0.003153788 |
| Developmental / cell cycle regulators | EGR1 | path:05212_11 | 0.007008495 |
| Developmental / cell cycle regulators | EGR1 | path:05212_12 | 0.008365691 |
| Developmental / cell cycle regulators | EGR1 | path:05218_4  | 0.003153788 |
| Developmental / cell cycle regulators | GLI1 | path:04340_2  | 0.002914772 |
| Developmental / cell cycle regulators | GLI1 | path:04510_11 | 0.004577555 |
| Developmental / cell cycle regulators | GLI1 | path:05200_34 | 0.002914772 |
| Developmental / cell cycle regulators | GLI3 | path:04340_1  | 0.005356158 |
| Developmental / cell cycle regulators | GLI3 | path:04340_2  | 0.000416702 |
| Developmental / cell cycle regulators | GLI3 | path:05200_34 | 0.000416702 |
| Developmental / cell cycle regulators | GLI3 | path:05200_57 | 0.003234702 |
| Developmental / cell cycle regulators | GLI3 | path:05217_1  | 0.003961103 |
| Developmental / cell cycle regulators | GLI3 | path:05217_2  | 0.003234702 |
| Developmental / cell cycle regulators | KLF4 | path:04110_17 | 4.70E-05    |
| Developmental / cell cycle regulators | KLF4 | path:04110_19 | 4.70E-05    |
| Developmental / cell cycle regulators | KLF4 | path:04110_20 | 0.000691257 |
| Developmental / cell cycle regulators | KLF4 | path:04110_23 | 0.001048885 |
| Developmental / cell cycle regulators | KLF4 | path:04110_26 | 0.001048885 |

|                                       |      |               |             |
|---------------------------------------|------|---------------|-------------|
| Developmental / cell cycle regulators | KLF4 | path:04110_27 | 0.000691257 |
| Developmental / cell cycle regulators | KLF4 | path:04110_3  | 0.001048885 |
| Developmental / cell cycle regulators | KLF4 | path:04110_4  | 0.001048885 |
| Developmental / cell cycle regulators | KLF4 | path:04110_7  | 0.001498093 |
| Developmental / cell cycle regulators | KLF4 | path:04115_1  | 0.003364391 |
| Developmental / cell cycle regulators | KLF4 | path:04512_1  | 0.007702669 |
| Developmental / cell cycle regulators | KLF4 | path:04512_2  | 0.007702669 |
| Developmental / cell cycle regulators | KLF4 | path:04512_4  | 0.007140402 |
| Developmental / cell cycle regulators | KLF4 | path:04512_7  | 0.007140402 |
| Developmental / cell cycle regulators | KLF4 | path:04512_8  | 0.007140402 |
| Developmental / cell cycle regulators | KLF4 | path:05145_14 | 0.007140402 |
| Developmental / cell cycle regulators | KLF4 | path:05200_31 | 0.003572583 |
| Developmental / cell cycle regulators | KLF4 | path:05200_47 | 0.002858346 |
| Developmental / cell cycle regulators | KLF4 | path:05200_51 | 0.003572583 |
| Developmental / cell cycle regulators | KLF4 | path:05200_52 | 0.007103944 |
| Developmental / cell cycle regulators | KLF4 | path:05200_53 | 0.005224296 |
| Developmental / cell cycle regulators | KLF4 | path:05210_12 | 0.003572583 |
| Developmental / cell cycle regulators | KLF4 | path:05210_7  | 0.003572583 |
| Developmental / cell cycle regulators | KLF4 | path:05214_13 | 0.003364391 |
| Developmental / cell cycle regulators | KLF4 | path:05214_14 | 0.002858346 |
| Developmental / cell cycle regulators | KLF4 | path:05214_15 | 0.003572583 |
| Developmental / cell cycle regulators | KLF4 | path:05218_7  | 0.003572583 |
| Developmental / cell cycle regulators | KLF4 | path:05219_4  | 0.003572583 |
| Developmental / cell cycle regulators | KLF4 | path:05220_11 | 0.003572583 |
| Developmental / cell cycle regulators | KLF4 | path:05220_12 | 0.003364391 |
| Developmental / cell cycle regulators | KLF4 | path:05220_9  | 0.002858346 |
| Developmental / cell cycle regulators | KLF5 | path:05200_31 | 0.000357162 |
| Developmental / cell cycle regulators | KLF5 | path:05210_12 | 0.000357162 |
| Developmental / cell cycle regulators | KLF5 | path:05210_7  | 0.000357162 |
| Ets-type                              | ELF1 | path:04060_8  | 8.41E-06    |
| Ets-type                              | ELF1 | path:04650_1  | 0.006320724 |
| Ets-type                              | ELF1 | path:04650_14 | 0.001225713 |
| Ets-type                              | ELF1 | path:04650_15 | 0.000687264 |
| Ets-type                              | ELF1 | path:04664_1  | 0.000687264 |

|                   |       |               |             |
|-------------------|-------|---------------|-------------|
| Ets-type          | ELF1  | path:04664_10 | 0.000533253 |
| Ets-type          | ELF1  | path:04664_2  | 1.05E-05    |
| Ets-type          | ELF1  | path:04664_3  | 0.000533253 |
| Ets-type          | ELF1  | path:04664_5  | 0.000533253 |
| Ets-type          | ELF1  | path:04664_9  | 0.000533253 |
| Ets-type          | ELF1  | path:05142_21 | 0.006320724 |
| Ets-type          | ELF1  | path:05310_4  | 0.000687264 |
| Ets-type          | ELF1  | path:05310_5  | 0.000687264 |
| Ets-type          | ETV4  | path:05200_29 | 0.000820491 |
| Ets-type          | SPI1  | path:04060_41 | 0.00153244  |
| Ets-type          | SPI1  | path:04145_2  | 0.005348786 |
| Ets-type          | SPI1  | path:04145_6  | 3.11E-06    |
| Ets-type          | SPI1  | path:04514_55 | 0.007630608 |
| Ets-type          | SPI1  | path:04514_62 | 0.003570772 |
| Ets-type          | SPI1  | path:04650_10 | 0.008430928 |
| Ets-type          | SPI1  | path:04650_12 | 0.007340609 |
| Ets-type          | SPI1  | path:04650_13 | 0.003805584 |
| Ets-type          | SPI1  | path:04670_10 | 0.003570772 |
| Ets-type          | SPI1  | path:04670_14 | 0.00153244  |
| Ets-type          | SPI1  | path:04670_15 | 0.000961365 |
| Ets-type          | SPI1  | path:04670_2  | 0.000252274 |
| Ets-type          | SPI1  | path:05140_4  | 0.000110411 |
| Ets-type          | SPI1  | path:05150_17 | 0.005348786 |
| Ets-type          | SPI1  | path:05200_43 | 0.000902646 |
| Fungal regulators | HMGA1 | path:04060_8  | 0.004640977 |
| GATA-Factors      | GATA1 | path:04060_47 | 0.009387437 |
| GATA-Factors      | GATA2 | path:04060_47 | 0.002976989 |
| GATA-Factors      | GATA3 | path:04612_4  | 0.003994597 |
| GATA-Factors      | GATA4 | path:00140_10 | 0.001238279 |
| GATA-Factors      | GATA4 | path:00140_13 | 0.001238279 |
| GATA-Factors      | GATA4 | path:00140_16 | 0.001238279 |
| GATA-Factors      | GATA4 | path:00140_18 | 0.001238279 |
| GATA-Factors      | GATA4 | path:00140_19 | 0.001238279 |
| GATA-Factors      | GATA4 | path:00140_3  | 0.001238279 |

|                           |       |               |             |
|---------------------------|-------|---------------|-------------|
| GATA-Factors              | GATA4 | path:00140_4  | 0.001238279 |
| GATA-Factors              | GATA4 | path:00140_5  | 0.001470007 |
| GATA-Factors              | GATA4 | path:00140_6  | 0.001710596 |
| GATA-Factors              | GATA4 | path:00140_7  | 0.001238279 |
| GATA-Factors              | GATA4 | path:00140_8  | 0.001226506 |
| GATA-Factors              | GATA4 | path:00140_9  | 0.001226506 |
| GATA-Factors              | GATA4 | path:00590_1  | 0.00061049  |
| GATA-Factors              | GATA4 | path:00590_2  | 0.00061049  |
| GATA-Factors              | GATA4 | path:00590_3  | 0.00061049  |
| GATA-Factors              | GATA4 | path:00590_4  | 0.00061049  |
| GATA-Factors              | GATA4 | path:00591_1  | 0.00061049  |
| GATA-Factors              | GATA4 | path:00980_2  | 0.00061049  |
| GATA-Factors              | GATA4 | path:00982_10 | 0.001958811 |
| GATA-Factors              | GATA4 | path:00982_4  | 0.001238279 |
| GATA-Factors              | GATA4 | path:00982_5  | 0.001238279 |
| GATA-Factors              | GATA4 | path:00982_9  | 0.001238279 |
| GATA-Factors              | GATA6 | path:00590_1  | 0.00185453  |
| GATA-Factors              | GATA6 | path:00590_2  | 0.00185453  |
| GATA-Factors              | GATA6 | path:00590_3  | 0.00185453  |
| GATA-Factors              | GATA6 | path:00590_4  | 0.00185453  |
| GATA-Factors              | GATA6 | path:00591_1  | 0.00185453  |
| GATA-Factors              | GATA6 | path:00982_10 | 0.008695178 |
| GATA-Factors              | GATA6 | path:00982_4  | 0.005342537 |
| GATA-Factors              | GATA6 | path:00982_5  | 0.005342537 |
| GATA-Factors              | GATA6 | path:00982_9  | 0.005342537 |
| Heteromeric CCAAT factors | NFYA  | path:04110_1  | 0.00144529  |
| Heteromeric CCAAT factors | NFYA  | path:04110_11 | 0.005383343 |
| Heteromeric CCAAT factors | NFYA  | path:04110_12 | 0.003794515 |
| Heteromeric CCAAT factors | NFYA  | path:04110_17 | 0.000340548 |
| Heteromeric CCAAT factors | NFYA  | path:04110_19 | 0.005565492 |
| Heteromeric CCAAT factors | NFYA  | path:04110_22 | 0.002132484 |
| Heteromeric CCAAT factors | NFYA  | path:04110_23 | 0.000299258 |
| Heteromeric CCAAT factors | NFYA  | path:04110_26 | 0.004551637 |
| Heteromeric CCAAT factors | NFYA  | path:04110_3  | 0.000299258 |



|                               |       |               |             |
|-------------------------------|-------|---------------|-------------|
| Heteromeric CCAAT factors     | NFYA  | path:04110_4  | 0.004713566 |
| Heteromeric CCAAT factors     | NFYA  | path:04110_7  | 0.000340548 |
| Heteromeric CCAAT factors     | NFYA  | path:04110_8  | 0.004551637 |
| Heteromeric CCAAT factors     | NFYA  | path:04115_1  | 0.001111281 |
| Heteromeric CCAAT factors     | NFYA  | path:04115_2  | 0.000123767 |
| Heteromeric CCAAT factors     | NFYA  | path:04115_3  | 0.000776011 |
| Heteromeric CCAAT factors     | NFYA  | path:04115_4  | 0.000776011 |
| Heteromeric CCAAT factors     | NFYA  | path:04115_7  | 0.000776011 |
| Homeo domain only             | HNF1A | path:00120_5  | 0.008512637 |
| Homeo domain only             | HNF1A | path:00140_1  | 0.008512637 |
| Homeo domain only             | HNF1A | path:00140_12 | 3.95E-05    |
| Homeo domain only             | HNF1A | path:00140_22 | 0.008512637 |
| Homeo domain only             | HNF1A | path:00140_23 | 0.008512637 |
| Homeo domain only             | HNF1A | path:00140_24 | 0.008512637 |
| Homeo domain only             | HNF1A | path:00140_25 | 0.008512637 |
| Homeo domain only             | HNF1A | path:00140_26 | 0.008512637 |
| Homeo domain only             | HNF1A | path:00982_6  | 0.008512637 |
| Homeo domain only             | HNF1A | path:04610_6  | 0.008512637 |
| Interferon-regulating factors | IRF1  | path:04060_51 | 0.00677924  |
| Interferon-regulating factors | IRF1  | path:04062_2  | 0.009036068 |
| Interferon-regulating factors | IRF1  | path:04620_1  | 0.000622656 |
| Interferon-regulating factors | IRF1  | path:04620_11 | 0.005102853 |
| Interferon-regulating factors | IRF1  | path:04620_12 | 2.78E-05    |
| Interferon-regulating factors | IRF1  | path:04620_13 | 0.00193948  |
| Interferon-regulating factors | IRF1  | path:04620_14 | 0.00193948  |
| Interferon-regulating factors | IRF1  | path:04620_16 | 0.002131661 |
| Interferon-regulating factors | IRF1  | path:04620_17 | 0.004615096 |
| Interferon-regulating factors | IRF1  | path:04620_18 | 0.002013452 |
| Interferon-regulating factors | IRF1  | path:04620_2  | 0.005102853 |
| Interferon-regulating factors | IRF1  | path:04620_22 | 0.004615096 |
| Interferon-regulating factors | IRF1  | path:04620_9  | 0.004615096 |
| Interferon-regulating factors | IRF1  | path:04670_2  | 0.00717245  |
| Interferon-regulating factors | IRF1  | path:05160_6  | 0.004615096 |
| Interferon-regulating factors | IRF3  | path:04060_38 | 5.44E-05    |

|                               |      |               |             |
|-------------------------------|------|---------------|-------------|
| Interferon-regulating factors | IRF3 | path:04620_11 | 3.65E-07    |
| Interferon-regulating factors | IRF3 | path:04620_12 | 1.24E-05    |
| Interferon-regulating factors | IRF3 | path:04620_14 | 0.005131788 |
| Interferon-regulating factors | IRF3 | path:04620_16 | 0.005500251 |
| Interferon-regulating factors | IRF3 | path:04620_17 | 0.009380523 |
| Interferon-regulating factors | IRF3 | path:04620_18 | 0.005305274 |
| Interferon-regulating factors | IRF3 | path:04620_2  | 3.65E-07    |
| Interferon-regulating factors | IRF3 | path:04620_22 | 0.009380523 |
| Interferon-regulating factors | IRF3 | path:04620_9  | 0.009501335 |
| Interferon-regulating factors | IRF3 | path:04650_6  | 5.75E-05    |
| Interferon-regulating factors | IRF3 | path:05160_6  | 5.75E-05    |
| Interferon-regulating factors | IRF5 | path:04060_38 | 0.005011517 |
| Interferon-regulating factors | IRF5 | path:04620_11 | 0.005011517 |
| Interferon-regulating factors | IRF5 | path:04620_2  | 0.005011517 |
| Interferon-regulating factors | IRF5 | path:04650_6  | 0.005011517 |
| Interferon-regulating factors | IRF5 | path:05160_6  | 0.005011517 |
| Interferon-regulating factors | IRF7 | path:04060_38 | 5.44E-05    |
| Interferon-regulating factors | IRF7 | path:04620_11 | 3.65E-07    |
| Interferon-regulating factors | IRF7 | path:04620_12 | 1.24E-05    |
| Interferon-regulating factors | IRF7 | path:04620_14 | 0.005131788 |
| Interferon-regulating factors | IRF7 | path:04620_16 | 0.005500251 |
| Interferon-regulating factors | IRF7 | path:04620_17 | 0.009380523 |
| Interferon-regulating factors | IRF7 | path:04620_18 | 0.005305274 |
| Interferon-regulating factors | IRF7 | path:04620_2  | 3.65E-07    |
| Interferon-regulating factors | IRF7 | path:04620_22 | 0.009380523 |
| Interferon-regulating factors | IRF7 | path:04620_9  | 0.009501335 |
| Interferon-regulating factors | IRF7 | path:04650_6  | 5.75E-05    |
| Interferon-regulating factors | IRF7 | path:05160_6  | 5.75E-05    |
| NF-1                          | NFIC | path:00591_1  | 0.004396514 |
| NF-1                          | NFIC | path:00982_11 | 0.005988829 |
| NF-1                          | NFIC | path:00982_2  | 0.00921451  |
| NF-1                          | NFIC | path:00982_3  | 0.005988829 |
| NF-1                          | NFIC | path:00982_4  | 0.00787147  |
| NF-1                          | NFIC | path:00982_5  | 0.00787147  |

|          |        |               |             |
|----------|--------|---------------|-------------|
| NF-1     | NFIC   | path:00982_7  | 0.004396514 |
| NF-1     | NFIC   | path:00982_8  | 0.004396514 |
| NF-1     | NFIC   | path:00982_9  | 0.00787147  |
| NF-1     | NFIC   | path:04010_30 | 0.00787147  |
| NF-1     | NFIC   | path:04010_31 | 0.00787147  |
| NF-1     | NFIC   | path:04080_7  | 0.004396514 |
| NF-1     | NFIC   | path:04115_1  | 0.008000492 |
| NF-1     | NFIC   | path:04115_2  | 0.00787147  |
| NF-1     | NFIC   | path:04115_3  | 0.00787147  |
| NF-1     | NFIC   | path:04115_4  | 0.00787147  |
| NF-1     | NFIC   | path:04115_7  | 0.00787147  |
| NF-1     | NFIC   | path:04660_8  | 0.00787147  |
| NF-1     | NFIC   | path:04662_6  | 0.00787147  |
| NF-1     | NFIC   | path:04722_19 | 0.00787147  |
| NF-1     | NFIC   | path:05160_15 | 0.00787147  |
| NF-1     | NFIC   | path:05200_47 | 0.007050709 |
| NF-1     | NFIC   | path:05200_48 | 0.004396514 |
| NF-1     | NFIC   | path:05200_51 | 0.00787147  |
| NF-1     | NFIC   | path:05214_12 | 0.004396514 |
| NF-1     | NFIC   | path:05214_13 | 0.00787147  |
| NF-1     | NFIC   | path:05214_14 | 0.007050709 |
| NF-1     | NFIC   | path:05218_5  | 0.004396514 |
| NF-1     | NFIC   | path:05218_6  | 0.004396514 |
| NF-1     | NFIC   | path:05220_12 | 0.00787147  |
| NF-1     | NFIC   | path:05220_8  | 0.004396514 |
| NF-1     | NFIC   | path:05220_9  | 0.007050709 |
| NF-AT    | NFATC1 | path:04060_32 | 0.003964221 |
| NF-AT    | NFATC1 | path:04060_33 | 0.003964221 |
| NF-AT    | NFATC1 | path:04650_20 | 0.003964221 |
| p53-like | TP53   | path:04010_15 | 0.007702858 |
| p53-like | TP53   | path:04010_16 | 0.009062653 |
| p53-like | TP53   | path:04010_21 | 0.007443002 |
| p53-like | TP53   | path:04012_12 | 0.002466645 |
| p53-like | TP53   | path:04110_1  | 2.55E-11    |

|          |      |               |             |
|----------|------|---------------|-------------|
| p53-like | TP53 | path:04110_17 | 3.28E-07    |
| p53-like | TP53 | path:04110_19 | 1.48E-05    |
| p53-like | TP53 | path:04110_20 | 0.001943417 |
| p53-like | TP53 | path:04110_22 | 7.56E-05    |
| p53-like | TP53 | path:04110_23 | 0.000198814 |
| p53-like | TP53 | path:04110_27 | 0.001943417 |
| p53-like | TP53 | path:04110_3  | 0.000210553 |
| p53-like | TP53 | path:04110_4  | 0.004511216 |
| p53-like | TP53 | path:04110_7  | 4.42E-09    |
| p53-like | TP53 | path:04110_8  | 0.004291125 |
| p53-like | TP53 | path:04115_1  | 0           |
| p53-like | TP53 | path:04115_2  | 0           |
| p53-like | TP53 | path:04115_3  | 0           |
| p53-like | TP53 | path:04115_4  | 0           |
| p53-like | TP53 | path:04115_7  | 0           |
| p53-like | TP53 | path:04210_20 | 0.000421718 |
| p53-like | TP53 | path:04210_23 | 0.000275763 |
| p53-like | TP53 | path:04210_24 | 0.000275763 |
| p53-like | TP53 | path:04510_10 | 0.009131774 |
| p53-like | TP53 | path:04510_15 | 0.004511216 |
| p53-like | TP53 | path:04510_16 | 0.002466645 |
| p53-like | TP53 | path:04510_17 | 0.000580605 |
| p53-like | TP53 | path:04510_18 | 0.001774645 |
| p53-like | TP53 | path:04510_25 | 0.006951959 |
| p53-like | TP53 | path:04510_5  | 0.006951959 |
| p53-like | TP53 | path:04510_6  | 0.009576653 |
| p53-like | TP53 | path:04510_7  | 0.001110697 |
| p53-like | TP53 | path:04510_8  | 0.00935253  |
| p53-like | TP53 | path:04621_7  | 0.009062653 |
| p53-like | TP53 | path:04722_19 | 0.000218217 |
| p53-like | TP53 | path:04912_8  | 0.002756828 |
| p53-like | TP53 | path:05014_4  | 0.009062653 |
| p53-like | TP53 | path:05160_12 | 0.007459365 |
| p53-like | TP53 | path:05160_15 | 0.009062653 |

|          |      |               |             |
|----------|------|---------------|-------------|
| p53-like | TP53 | path:05200_10 | 0.000338058 |
| p53-like | TP53 | path:05200_11 | 0.000275763 |
| p53-like | TP53 | path:05200_12 | 0.000275763 |
| p53-like | TP53 | path:05200_15 | 0.000968321 |
| p53-like | TP53 | path:05200_17 | 0.00392722  |
| p53-like | TP53 | path:05200_19 | 0.002997803 |
| p53-like | TP53 | path:05200_20 | 0.00011707  |
| p53-like | TP53 | path:05200_4  | 0.000275763 |
| p53-like | TP53 | path:05200_47 | 7.56E-05    |
| p53-like | TP53 | path:05200_48 | 1.95E-05    |
| p53-like | TP53 | path:05200_5  | 0.000367024 |
| p53-like | TP53 | path:05200_51 | 0.000172314 |
| p53-like | TP53 | path:05200_8  | 1.95E-05    |
| p53-like | TP53 | path:05213_2  | 0.007459365 |
| p53-like | TP53 | path:05214_1  | 0.003580594 |
| p53-like | TP53 | path:05214_10 | 0.000210553 |
| p53-like | TP53 | path:05214_11 | 0.001774645 |
| p53-like | TP53 | path:05214_12 | 1.95E-05    |
| p53-like | TP53 | path:05214_13 | 0.00011707  |
| p53-like | TP53 | path:05214_14 | 7.56E-05    |
| p53-like | TP53 | path:05214_4  | 0.003580594 |
| p53-like | TP53 | path:05215_10 | 0.004511216 |
| p53-like | TP53 | path:05215_11 | 0.000275763 |
| p53-like | TP53 | path:05215_3  | 0.00331496  |
| p53-like | TP53 | path:05218_2  | 0.002754132 |
| p53-like | TP53 | path:05218_5  | 0.001774645 |
| p53-like | TP53 | path:05218_6  | 1.95E-05    |
| p53-like | TP53 | path:05218_8  | 0.001385048 |
| p53-like | TP53 | path:05219_3  | 0.001691972 |
| p53-like | TP53 | path:05219_4  | 0.009062653 |
| p53-like | TP53 | path:05220_12 | 0.00011707  |
| p53-like | TP53 | path:05220_8  | 1.95E-05    |
| p53-like | TP53 | path:05220_9  | 7.56E-05    |
| p53-like | TP63 | path:04110_1  | 2.23E-05    |

|                          |      |               |             |
|--------------------------|------|---------------|-------------|
| p53-like                 | TP63 | path:04110_7  | 8.12E-05    |
| p53-like                 | TP63 | path:04115_1  | 8.12E-05    |
| p53-like                 | TP63 | path:04115_2  | 8.12E-05    |
| p53-like                 | TP63 | path:04115_3  | 8.12E-05    |
| p53-like                 | TP63 | path:04115_4  | 8.12E-05    |
| p53-like                 | TP63 | path:04115_7  | 8.12E-05    |
| p53-like                 | TP63 | path:05200_17 | 0.003115907 |
| p53-like                 | TP63 | path:05200_19 | 0.002783081 |
| p53-like                 | TP63 | path:05200_20 | 0.002783081 |
| p53-like                 | TP63 | path:05200_47 | 0.000159403 |
| p53-like                 | TP63 | path:05200_48 | 8.12E-05    |
| p53-like                 | TP63 | path:05214_12 | 8.12E-05    |
| p53-like                 | TP63 | path:05214_14 | 0.000159403 |
| p53-like                 | TP63 | path:05215_11 | 0.004120782 |
| p53-like                 | TP63 | path:05215_3  | 0.002837304 |
| p53-like                 | TP63 | path:05218_6  | 8.12E-05    |
| p53-like                 | TP63 | path:05220_8  | 8.12E-05    |
| p53-like                 | TP63 | path:05220_9  | 0.000159403 |
| p53-like                 | TP73 | path:04115_1  | 6.75E-05    |
| p53-like                 | TP73 | path:04115_2  | 6.67E-05    |
| p53-like                 | TP73 | path:04115_3  | 6.67E-05    |
| p53-like                 | TP73 | path:04115_4  | 6.67E-05    |
| p53-like                 | TP73 | path:04115_7  | 6.67E-05    |
| p53-like                 | TP73 | path:04722_19 | 0.000595015 |
| Paired plus homeo domain | PAX6 | path:04510_1  | 7.62E-06    |
| Paired plus homeo domain | PAX6 | path:04510_10 | 0.000221093 |
| Paired plus homeo domain | PAX6 | path:04510_17 | 0.004905129 |
| Paired plus homeo domain | PAX6 | path:04510_18 | 0.008727391 |
| Paired plus homeo domain | PAX6 | path:04510_19 | 7.62E-06    |
| Paired plus homeo domain | PAX6 | path:04510_20 | 2.77E-05    |
| Paired plus homeo domain | PAX6 | path:04510_4  | 5.33E-05    |
| Paired plus homeo domain | PAX6 | path:04510_6  | 0.000221093 |
| Paired plus homeo domain | PAX6 | path:04510_7  | 0.006713786 |
| Paired plus homeo domain | PAX6 | path:04510_8  | 0.000221093 |

|                          |        |               |             |
|--------------------------|--------|---------------|-------------|
| Paired plus homeo domain | PAX6   | path:04512_23 | 4.96E-05    |
| Paired plus homeo domain | PAX6   | path:04512_24 | 6.38E-05    |
| Paired plus homeo domain | PAX6   | path:04512_9  | 0.004167242 |
| Paired plus homeo domain | PAX6   | path:04514_49 | 0.000131273 |
| Paired plus homeo domain | PAX6   | path:04514_50 | 0.000131273 |
| Paired plus homeo domain | PAX6   | path:04514_56 | 9.92E-05    |
| Paired plus homeo domain | PAX6   | path:04514_57 | 6.38E-05    |
| Paired plus homeo domain | PAX6   | path:04670_14 | 0.00067845  |
| Paired plus homeo domain | PAX6   | path:04670_2  | 0.002170272 |
| Paired plus homeo domain | PAX6   | path:04670_20 | 0.000614792 |
| Paired plus homeo domain | PAX6   | path:04670_9  | 4.96E-05    |
| Paired plus homeo domain | PAX6   | path:04810_29 | 4.23E-05    |
| Paired plus homeo domain | PAX6   | path:05100_10 | 0.000173551 |
| Paired plus homeo domain | PAX6   | path:05100_3  | 6.38E-05    |
| Paired plus homeo domain | PAX6   | path:05131_5  | 4.96E-05    |
| Paired plus homeo domain | PAX6   | path:05131_6  | 4.96E-05    |
| Paired plus homeo domain | PAX6   | path:05140_1  | 6.38E-05    |
| Paired plus homeo domain | PAX6   | path:05414_2  | 1.40E-05    |
| POU domain factors       | POU2F1 | path:00590_1  | 0.000870331 |
| POU domain factors       | POU2F1 | path:00590_2  | 0.000870331 |
| POU domain factors       | POU2F1 | path:00590_3  | 0.000870331 |
| POU domain factors       | POU2F1 | path:00590_4  | 0.000870331 |
| POU domain factors       | POU2F1 | path:00591_1  | 0.006943045 |
| POU domain factors       | POU2F1 | path:00830_2  | 3.54E-05    |
| POU domain factors       | POU2F1 | path:00980_2  | 0.008647196 |
| POU domain factors       | POU2F1 | path:00982_4  | 0.000646745 |
| POU domain factors       | POU2F1 | path:00982_5  | 0.000646745 |
| POU domain factors       | POU2F1 | path:00982_9  | 0.000646745 |
| POU domain factors       | POU2F1 | path:04110_17 | 0.000667343 |
| POU domain factors       | POU2F1 | path:04110_18 | 0.000623378 |
| POU domain factors       | POU2F1 | path:04110_19 | 0.000667343 |
| POU domain factors       | POU2F1 | path:04110_20 | 0.0031585   |
| POU domain factors       | POU2F1 | path:04110_25 | 0.001500996 |
| POU domain factors       | POU2F1 | path:04110_27 | 0.0031585   |

|                                        |        |               |             |
|----------------------------------------|--------|---------------|-------------|
| POU domain factors                     | POU2F1 | path:04664_2  | 0.007941331 |
| POU domain factors                     | POU2F1 | path:04664_5  | 0.003467546 |
| POU domain factors                     | POU2F1 | path:05200_50 | 0.000667343 |
| POU domain factors                     | POU2F1 | path:05200_51 | 0.000646745 |
| POU domain factors                     | POU2F1 | path:05200_52 | 0.000870331 |
| POU domain factors                     | POU2F1 | path:05222_1  | 0.000870331 |
| POU domain factors                     | POU2F1 | path:05222_2  | 0.000870331 |
| Regulators with a DNA recognition wing | RFX1   | path:04514_1  | 2.14E-06    |
| Regulators with a DNA recognition wing | RFX1   | path:04514_3  | 2.14E-06    |
| Regulators with a DNA recognition wing | RFX1   | path:04612_3  | 2.14E-06    |
| Regulators with a DNA recognition wing | RFX1   | path:04672_4  | 2.14E-06    |
| Regulators with a DNA recognition wing | RFX1   | path:04672_5  | 2.14E-06    |
| Regulators with a DNA recognition wing | RFX1   | path:04940_1  | 2.14E-06    |
| Regulators with a DNA recognition wing | RFX1   | path:05150_14 | 2.14E-06    |
| Regulators with a DNA recognition wing | RFX1   | path:05310_1  | 2.14E-06    |
| Regulators with a DNA recognition wing | RFX1   | path:05310_3  | 2.14E-06    |
| Regulators with a DNA recognition wing | RFX1   | path:05320_1  | 2.14E-06    |
| Regulators with a DNA recognition wing | RFX1   | path:05320_3  | 2.14E-06    |
| Regulators with a DNA recognition wing | RFX1   | path:05320_4  | 2.14E-06    |
| Regulators with a DNA recognition wing | RFX1   | path:05320_6  | 2.14E-06    |
| Regulators with a DNA recognition wing | RFX1   | path:05322_5  | 2.14E-06    |
| Regulators with a DNA recognition wing | RFX1   | path:05322_6  | 2.14E-06    |
| Regulators with a DNA recognition wing | RFX1   | path:05330_1  | 2.14E-06    |
| Regulators with a DNA recognition wing | RFX1   | path:05330_2  | 2.14E-06    |
| Regulators with a DNA recognition wing | RFX1   | path:05330_4  | 2.14E-06    |
| Regulators with a DNA recognition wing | RFX1   | path:05330_7  | 5.59E-06    |
| Regulators with a DNA recognition wing | RFX1   | path:05332_1  | 2.14E-06    |
| Regulators with a DNA recognition wing | RFX1   | path:05416_4  | 2.14E-06    |
| Regulators with a DNA recognition wing | RFX2   | path:04514_1  | 3.82E-07    |
| Regulators with a DNA recognition wing | RFX2   | path:04514_3  | 3.82E-07    |
| Regulators with a DNA recognition wing | RFX2   | path:04612_3  | 3.82E-07    |
| Regulators with a DNA recognition wing | RFX2   | path:04672_4  | 3.82E-07    |
| Regulators with a DNA recognition wing | RFX2   | path:04672_5  | 3.82E-07    |
| Regulators with a DNA recognition wing | RFX2   | path:04940_1  | 3.82E-07    |



|                                        |      |               |          |
|----------------------------------------|------|---------------|----------|
| Regulators with a DNA recognition wing | RFX2 | path:05150_14 | 3.82E-07 |
| Regulators with a DNA recognition wing | RFX2 | path:05310_1  | 3.82E-07 |
| Regulators with a DNA recognition wing | RFX2 | path:05310_3  | 3.82E-07 |
| Regulators with a DNA recognition wing | RFX2 | path:05320_1  | 3.82E-07 |
| Regulators with a DNA recognition wing | RFX2 | path:05320_3  | 3.82E-07 |
| Regulators with a DNA recognition wing | RFX2 | path:05320_4  | 3.82E-07 |
| Regulators with a DNA recognition wing | RFX2 | path:05320_6  | 3.82E-07 |
| Regulators with a DNA recognition wing | RFX2 | path:05322_5  | 3.82E-07 |
| Regulators with a DNA recognition wing | RFX2 | path:05322_6  | 3.82E-07 |
| Regulators with a DNA recognition wing | RFX2 | path:05330_1  | 3.82E-07 |
| Regulators with a DNA recognition wing | RFX2 | path:05330_2  | 3.82E-07 |
| Regulators with a DNA recognition wing | RFX2 | path:05330_4  | 3.82E-07 |
| Regulators with a DNA recognition wing | RFX2 | path:05330_7  | 1.00E-06 |
| Regulators with a DNA recognition wing | RFX2 | path:05332_1  | 3.82E-07 |
| Regulators with a DNA recognition wing | RFX2 | path:05416_4  | 3.82E-07 |
| Regulators with a DNA recognition wing | RFX3 | path:04514_1  | 1.53E-07 |
| Regulators with a DNA recognition wing | RFX3 | path:04514_3  | 1.53E-07 |
| Regulators with a DNA recognition wing | RFX3 | path:04612_3  | 1.53E-07 |
| Regulators with a DNA recognition wing | RFX3 | path:04672_4  | 1.53E-07 |
| Regulators with a DNA recognition wing | RFX3 | path:04672_5  | 1.53E-07 |
| Regulators with a DNA recognition wing | RFX3 | path:04940_1  | 1.53E-07 |
| Regulators with a DNA recognition wing | RFX3 | path:05150_14 | 1.53E-07 |
| Regulators with a DNA recognition wing | RFX3 | path:05310_1  | 1.53E-07 |
| Regulators with a DNA recognition wing | RFX3 | path:05310_3  | 1.53E-07 |
| Regulators with a DNA recognition wing | RFX3 | path:05320_1  | 1.53E-07 |
| Regulators with a DNA recognition wing | RFX3 | path:05320_3  | 1.53E-07 |
| Regulators with a DNA recognition wing | RFX3 | path:05320_4  | 1.53E-07 |
| Regulators with a DNA recognition wing | RFX3 | path:05320_6  | 1.53E-07 |
| Regulators with a DNA recognition wing | RFX3 | path:05322_5  | 1.53E-07 |
| Regulators with a DNA recognition wing | RFX3 | path:05322_6  | 1.53E-07 |
| Regulators with a DNA recognition wing | RFX3 | path:05330_1  | 1.53E-07 |
| Regulators with a DNA recognition wing | RFX3 | path:05330_2  | 1.53E-07 |
| Regulators with a DNA recognition wing | RFX3 | path:05330_4  | 1.53E-07 |
| Regulators with a DNA recognition wing | RFX3 | path:05330_7  | 4.00E-07 |

|                                        |       |               |             |
|----------------------------------------|-------|---------------|-------------|
| Regulators with a DNA recognition wing | RFX3  | path:05332_1  | 1.53E-07    |
| Regulators with a DNA recognition wing | RFX3  | path:05416_4  | 1.53E-07    |
| Rel/ankyrin                            | REL   | path:04060_8  | 0.004162941 |
| Rel/ankyrin                            | REL   | path:04612_7  | 0.005200652 |
| Rel/ankyrin                            | REL   | path:04650_22 | 0.00019873  |
| Rel/ankyrin                            | REL   | path:04650_23 | 0.00019873  |
| Rel/ankyrin                            | RELA  | path:04060_62 | 0.000137451 |
| Rel/ankyrin                            | RELA  | path:04062_1  | 2.04E-07    |
| Rel/ankyrin                            | RELA  | path:04062_2  | 3.87E-08    |
| Rel/ankyrin                            | RELA  | path:04110_17 | 0.001869278 |
| Rel/ankyrin                            | RELA  | path:04110_19 | 0.001781655 |
| Rel/ankyrin                            | RELA  | path:04110_7  | 0.001869278 |
| Rel/ankyrin                            | RELA  | path:04115_1  | 0.0005539   |
| Rel/ankyrin                            | RELA  | path:04620_1  | 2.11E-06    |
| Rel/ankyrin                            | RELA  | path:04620_12 | 4.80E-09    |
| Rel/ankyrin                            | RELA  | path:04620_13 | 1.51E-07    |
| Rel/ankyrin                            | RELA  | path:04620_14 | 2.07E-07    |
| Rel/ankyrin                            | RELA  | path:04620_16 | 1.03E-08    |
| Rel/ankyrin                            | RELA  | path:04620_17 | 6.51E-08    |
| Rel/ankyrin                            | RELA  | path:04620_18 | 8.85E-09    |
| Rel/ankyrin                            | RELA  | path:04620_22 | 6.51E-08    |
| Rel/ankyrin                            | RELA  | path:04620_9  | 7.78E-08    |
| Rel/ankyrin                            | RELA  | path:04650_22 | 0.00197363  |
| Rel/ankyrin                            | RELA  | path:04650_23 | 0.001781655 |
| Responders to external signals         | SRF   | path:05020_8  | 0.004545882 |
| Responders to external signals         | SRF   | path:05020_9  | 0.00379009  |
| Responders to external signals         | SRF   | path:05410_2  | 0.003033557 |
| Responders to external signals         | SRF   | path:05414_3  | 0.003033557 |
| Responders to external signals         | SRF   | path:05416_1  | 0.003033557 |
| Runt                                   | RUNX3 | path:04612_4  | 0.000198099 |
| SMAD                                   | SMAD2 | path:04110_18 | 6.60E-05    |
| SMAD                                   | SMAD2 | path:04110_25 | 5.26E-05    |
| SMAD                                   | SMAD2 | path:04510_1  | 5.26E-05    |
| SMAD                                   | SMAD2 | path:04510_10 | 0.002748036 |

|      |       |               |             |
|------|-------|---------------|-------------|
| SMAD | SMAD2 | path:04510_19 | 5.26E-05    |
| SMAD | SMAD2 | path:04510_6  | 0.002748036 |
| SMAD | SMAD2 | path:04510_8  | 0.002748036 |
| SMAD | SMAD2 | path:04512_11 | 0.005671238 |
| SMAD | SMAD2 | path:04512_12 | 0.000121975 |
| SMAD | SMAD2 | path:04512_13 | 5.26E-05    |
| SMAD | SMAD2 | path:04512_14 | 0.005849438 |
| SMAD | SMAD2 | path:04512_6  | 0.00016587  |
| SMAD | SMAD2 | path:05146_9  | 0.003683338 |
| SMAD | SMAD3 | path:04110_18 | 0.001049896 |
| SMAD | SMAD3 | path:04110_25 | 0.000921676 |
| SMAD | SMAD3 | path:04510_1  | 0.00105392  |
| SMAD | SMAD3 | path:04510_19 | 0.001170463 |
| SMAD | SMAD3 | path:04512_12 | 0.001326293 |
| SMAD | SMAD3 | path:04512_13 | 0.000921676 |
| SMAD | SMAD3 | path:04512_6  | 0.001837367 |
| SMAD | SMAD3 | path:05200_29 | 0.000921676 |
| SMAD | SMAD3 | path:05210_10 | 0.007105406 |
| SMAD | SMAD4 | path:04110_18 | 0.000743893 |
| SMAD | SMAD4 | path:04110_25 | 0.000620016 |
| SMAD | SMAD4 | path:04115_1  | 0.003366083 |
| SMAD | SMAD4 | path:04115_2  | 0.003046128 |
| SMAD | SMAD4 | path:04115_3  | 0.003046128 |
| SMAD | SMAD4 | path:04115_4  | 0.003046128 |
| SMAD | SMAD4 | path:04115_7  | 0.003046128 |
| SMAD | SMAD4 | path:05200_29 | 0.000734371 |
| SMAD | SMAD4 | path:05210_10 | 0.004709635 |
| SMAD | SMAD4 | path:05210_9  | 0.006805486 |
| STAT | STAT1 | path:04110_18 | 0.00514314  |
| STAT | STAT1 | path:04145_5  | 0.006088364 |
| STAT | STAT1 | path:04620_16 | 0.002113614 |
| STAT | STAT1 | path:04620_17 | 0.003819783 |
| STAT | STAT1 | path:04620_18 | 0.002113614 |
| STAT | STAT1 | path:04620_22 | 0.003819783 |

|      |        |               |             |
|------|--------|---------------|-------------|
| STAT | STAT1  | path:04620_9  | 0.003819783 |
| STAT | STAT1  | path:04630_3  | 0.006088364 |
| STAT | STAT1  | path:04630_4  | 0.001501202 |
| STAT | STAT1  | path:05200_29 | 0.003819783 |
| STAT | STAT1  | path:05210_10 | 0.001312831 |
| STAT | STAT3  | path:04060_3  | 0.007358355 |
| STAT | STAT3  | path:04060_8  | 0.008398489 |
| STAT | STAT3  | path:04630_2  | 0.00794491  |
| STAT | STAT3  | path:04630_3  | 0.00794491  |
| STAT | STAT3  | path:04630_4  | 5.36E-05    |
| STAT | STAT3  | path:05142_4  | 0.000767514 |
| STAT | STAT3  | path:05200_29 | 0.000108961 |
| STAT | STAT4  | path:04630_4  | 0.000257265 |
| STAT | STAT5A | path:04630_4  | 0.000370487 |
| STAT | STAT5B | path:04110_20 | 0.009500448 |
| STAT | STAT5B | path:04110_27 | 0.009500448 |
| STAT | STAT5B | path:04630_4  | 0.000370487 |
| STAT | STAT5B | path:05200_29 | 0.009500448 |
| STAT | STAT5B | path:05200_47 | 0.002527186 |
| STAT | STAT5B | path:05200_51 | 0.002527186 |
| STAT | STAT5B | path:05200_52 | 0.005012521 |
| STAT | STAT5B | path:05214_13 | 0.002527186 |
| STAT | STAT5B | path:05214_14 | 0.002527186 |
| STAT | STAT5B | path:05214_15 | 0.002527186 |
| STAT | STAT5B | path:05218_5  | 0.009500448 |
| STAT | STAT5B | path:05218_7  | 0.002527186 |
| STAT | STAT5B | path:05218_8  | 0.009060668 |
| STAT | STAT5B | path:05219_4  | 0.002527186 |
| STAT | STAT5B | path:05220_11 | 0.002527186 |
| STAT | STAT5B | path:05220_12 | 0.002527186 |
| STAT | STAT5B | path:05220_9  | 0.002527186 |
| STAT | STAT6  | path:00590_4  | 0.003994719 |
| STAT | STAT6  | path:04630_2  | 0.000657478 |
| STAT | STAT6  | path:04630_3  | 0.000657478 |

|                                 |       |               |             |
|---------------------------------|-------|---------------|-------------|
| STAT                            | STAT6 | path:04630_4  | 0.000657478 |
| Steroid hormone receptors (NR3) | AR    | path:04110_18 | 0.002649237 |
| Steroid hormone receptors (NR3) | AR    | path:04110_23 | 0.003572289 |
| Steroid hormone receptors (NR3) | AR    | path:04115_1  | 0.000666989 |
| Steroid hormone receptors (NR3) | AR    | path:04115_2  | 0.005794552 |
| Steroid hormone receptors (NR3) | AR    | path:04115_3  | 0.000666989 |
| Steroid hormone receptors (NR3) | AR    | path:04115_4  | 0.005794552 |
| Steroid hormone receptors (NR3) | AR    | path:04115_7  | 0.005794552 |
| Steroid hormone receptors (NR3) | AR    | path:05200_16 | 0.005794552 |
| Steroid hormone receptors (NR3) | AR    | path:05200_47 | 0.005794552 |
| Steroid hormone receptors (NR3) | AR    | path:05200_51 | 0.006067474 |
| Steroid hormone receptors (NR3) | AR    | path:05214_13 | 0.005794552 |
| Steroid hormone receptors (NR3) | AR    | path:05214_14 | 0.005794552 |
| Steroid hormone receptors (NR3) | AR    | path:05214_15 | 0.006236059 |
| Steroid hormone receptors (NR3) | AR    | path:05215_1  | 0.006236059 |
| Steroid hormone receptors (NR3) | AR    | path:05216_4  | 0.006067474 |
| Steroid hormone receptors (NR3) | AR    | path:05218_7  | 0.006236059 |
| Steroid hormone receptors (NR3) | AR    | path:05219_4  | 0.006067474 |
| Steroid hormone receptors (NR3) | AR    | path:05220_11 | 0.006236059 |
| Steroid hormone receptors (NR3) | AR    | path:05220_12 | 0.005794552 |
| Steroid hormone receptors (NR3) | AR    | path:05220_9  | 0.005794552 |
| Steroid hormone receptors (NR3) | ESR1  | path:00830_2  | 0.005413618 |
| Steroid hormone receptors (NR3) | ESR1  | path:04115_1  | 0.000345486 |
| Steroid hormone receptors (NR3) | ESR1  | path:04115_2  | 0.002979325 |
| Steroid hormone receptors (NR3) | ESR1  | path:04115_3  | 0.002948202 |
| Steroid hormone receptors (NR3) | ESR1  | path:04115_4  | 0.002948202 |
| Steroid hormone receptors (NR3) | ESR1  | path:04115_7  | 0.002948202 |
| Steroid hormone receptors (NR3) | ESR1  | path:04610_8  | 0.002948202 |
| Steroid hormone receptors (NR3) | ESR1  | path:05200_29 | 0.000345486 |
| Steroid hormone receptors (NR3) | HNF4A | path:00120_15 | 0.00730316  |
| Steroid hormone receptors (NR3) | HNF4A | path:00120_19 | 0.003812707 |
| Steroid hormone receptors (NR3) | HNF4A | path:00120_6  | 0.001698537 |
| Steroid hormone receptors (NR3) | HNF4A | path:00120_7  | 0.003812707 |
| Steroid hormone receptors (NR3) | HNF4A | path:00120_9  | 0.000100826 |

|                                 |       |               |             |
|---------------------------------|-------|---------------|-------------|
| Steroid hormone receptors (NR3) | HNF4A | path:00590_1  | 0.001808381 |
| Steroid hormone receptors (NR3) | HNF4A | path:00590_2  | 0.001722691 |
| Steroid hormone receptors (NR3) | HNF4A | path:00590_3  | 0.001722691 |
| Steroid hormone receptors (NR3) | HNF4A | path:00590_4  | 0.001898001 |
| Steroid hormone receptors (NR3) | HNF4A | path:00591_1  | 0.000515682 |
| Steroid hormone receptors (NR3) | HNF4A | path:00830_2  | 2.36E-05    |
| Steroid hormone receptors (NR3) | HNF4A | path:00980_2  | 0.000733563 |
| Steroid hormone receptors (NR3) | HNF4A | path:00982_10 | 2.52E-07    |
| Steroid hormone receptors (NR3) | HNF4A | path:00982_4  | 5.38E-08    |
| Steroid hormone receptors (NR3) | HNF4A | path:00982_5  | 5.38E-08    |
| Steroid hormone receptors (NR3) | HNF4A | path:00982_9  | 5.38E-08    |
| Steroid hormone receptors (NR3) | HNF4A | path:03320_1  | 0.001131883 |
| Steroid hormone receptors (NR3) | HNF4A | path:03320_2  | 0.000100826 |
| Steroid hormone receptors (NR3) | HNF4A | path:04610_2  | 4.35E-06    |
| Steroid hormone receptors (NR3) | HNF4A | path:04610_3  | 4.35E-06    |
| Steroid hormone receptors (NR3) | HNF4A | path:04610_4  | 0.000100826 |
| Steroid hormone receptors (NR3) | HNF4A | path:04610_5  | 6.69E-06    |
| Steroid hormone receptors (NR3) | HNF4A | path:04610_6  | 0.000179282 |
| Steroid hormone receptors (NR3) | HNF4A | path:04610_8  | 0.001698537 |
| Steroid hormone receptors (NR3) | HNF4A | path:04950_4  | 0.000287791 |
| Steroid hormone receptors (NR3) | NR1I2 | path:00830_2  | 0.004391058 |
| Steroid hormone receptors (NR3) | NR1I2 | path:00982_4  | 0.00011908  |
| Steroid hormone receptors (NR3) | NR1I2 | path:00982_5  | 0.00011908  |
| Steroid hormone receptors (NR3) | NR1I2 | path:00982_9  | 0.00011908  |
| Steroid hormone receptors (NR3) | NR1I3 | path:00830_2  | 0.000186607 |
| Steroid hormone receptors (NR3) | NR1I3 | path:00980_1  | 0.006275482 |
| Steroid hormone receptors (NR3) | NR1I3 | path:00982_4  | 0.000535628 |
| Steroid hormone receptors (NR3) | NR1I3 | path:00982_5  | 0.000535628 |
| Steroid hormone receptors (NR3) | NR1I3 | path:00982_9  | 0.000535628 |
| Steroid hormone receptors (NR3) | NR2F1 | path:03320_2  | 0.000132961 |
| Steroid hormone receptors (NR3) | NR4A1 | path:00140_10 | 0.00077713  |
| Steroid hormone receptors (NR3) | NR4A1 | path:00140_13 | 6.42E-06    |
| Steroid hormone receptors (NR3) | NR4A1 | path:00140_14 | 0.00077713  |
| Steroid hormone receptors (NR3) | NR4A1 | path:00140_16 | 0.00077713  |

|                                 |       |               |             |
|---------------------------------|-------|---------------|-------------|
| Steroid hormone receptors (NR3) | NR4A1 | path:00140_18 | 0.00077713  |
| Steroid hormone receptors (NR3) | NR4A1 | path:00140_19 | 0.000832486 |
| Steroid hormone receptors (NR3) | NR4A1 | path:00140_20 | 0.00077713  |
| Steroid hormone receptors (NR3) | NR4A1 | path:00140_3  | 0.00077713  |
| Steroid hormone receptors (NR3) | NR4A1 | path:00140_4  | 0.00077713  |
| Steroid hormone receptors (NR3) | NR4A1 | path:00140_5  | 0.000960385 |
| Steroid hormone receptors (NR3) | NR4A1 | path:00140_6  | 0.001089761 |
| Steroid hormone receptors (NR3) | NR4A1 | path:00140_7  | 0.000832486 |
| Steroid hormone receptors (NR3) | NR4A1 | path:00140_8  | 0.00077713  |
| Steroid hormone receptors (NR3) | NR4A1 | path:00140_9  | 0.00077713  |
| Steroid hormone receptors (NR3) | NR5A1 | path:00140_10 | 1.53E-06    |
| Steroid hormone receptors (NR3) | NR5A1 | path:00140_11 | 1.69E-05    |
| Steroid hormone receptors (NR3) | NR5A1 | path:00140_12 | 0.000116509 |
| Steroid hormone receptors (NR3) | NR5A1 | path:00140_13 | 6.63E-09    |
| Steroid hormone receptors (NR3) | NR5A1 | path:00140_14 | 0.000393628 |
| Steroid hormone receptors (NR3) | NR5A1 | path:00140_16 | 1.15E-06    |
| Steroid hormone receptors (NR3) | NR5A1 | path:00140_18 | 1.15E-06    |
| Steroid hormone receptors (NR3) | NR5A1 | path:00140_19 | 1.72E-06    |
| Steroid hormone receptors (NR3) | NR5A1 | path:00140_20 | 0.00062425  |
| Steroid hormone receptors (NR3) | NR5A1 | path:00140_22 | 5.77E-05    |
| Steroid hormone receptors (NR3) | NR5A1 | path:00140_23 | 5.77E-05    |
| Steroid hormone receptors (NR3) | NR5A1 | path:00140_24 | 5.77E-05    |
| Steroid hormone receptors (NR3) | NR5A1 | path:00140_3  | 0.00062425  |
| Steroid hormone receptors (NR3) | NR5A1 | path:00140_4  | 0.00062425  |
| Steroid hormone receptors (NR3) | NR5A1 | path:00140_5  | 2.18E-06    |
| Steroid hormone receptors (NR3) | NR5A1 | path:00140_6  | 2.70E-06    |
| Steroid hormone receptors (NR3) | NR5A1 | path:00140_7  | 1.72E-06    |
| Steroid hormone receptors (NR3) | NR5A1 | path:00140_8  | 1.09E-06    |
| Steroid hormone receptors (NR3) | NR5A1 | path:00140_9  | 1.09E-06    |
| Steroid hormone receptors (NR3) | NR5A1 | path:04060_21 | 8.93E-05    |
| Steroid hormone receptors (NR3) | NR5A1 | path:04350_13 | 0.002225649 |
| Steroid hormone receptors (NR3) | NR5A2 | path:00140_11 | 0.000442761 |
| Steroid hormone receptors (NR3) | NR5A2 | path:00140_12 | 0.002212517 |
| Steroid hormone receptors (NR3) | NR5A2 | path:00140_18 | 0.003089823 |

|                                 |       |               |             |
|---------------------------------|-------|---------------|-------------|
| Steroid hormone receptors (NR3) | NR5A2 | path:00140_3  | 0.003089823 |
| Steroid hormone receptors (NR3) | NR5A2 | path:00140_4  | 0.003089823 |
| Steroid hormone receptors (NR3) | NR5A2 | path:00140_5  | 0.00385968  |
| Steroid hormone receptors (NR3) | NR5A2 | path:00140_6  | 0.004244219 |
| Steroid hormone receptors (NR3) | NR5A2 | path:00140_7  | 0.003474881 |
| Steroid hormone receptors (NR3) | NR5A2 | path:00140_8  | 0.002898659 |
| Steroid hormone receptors (NR3) | NR5A2 | path:00140_9  | 0.002898659 |
| Steroid hormone receptors (NR3) | THRB  | path:04080_2  | 0.000625072 |
| Steroid hormone receptors (NR3) | VDR   | path:00140_1  | 0.009786942 |
| Steroid hormone receptors (NR3) | VDR   | path:00140_11 | 0.008771608 |
| Steroid hormone receptors (NR3) | VDR   | path:00140_25 | 0.009786942 |
| Steroid hormone receptors (NR3) | VDR   | path:00140_26 | 0.009786942 |
| Steroid hormone receptors (NR3) | VDR   | path:00591_1  | 0.008771608 |
| Steroid hormone receptors (NR3) | VDR   | path:00980_2  | 0.00973729  |
| Steroid hormone receptors (NR3) | VDR   | path:00982_10 | 0.004788204 |
| Steroid hormone receptors (NR3) | VDR   | path:00982_11 | 0.001635842 |
| Steroid hormone receptors (NR3) | VDR   | path:00982_2  | 0.003675018 |
| Steroid hormone receptors (NR3) | VDR   | path:00982_3  | 0.001635842 |
| Steroid hormone receptors (NR3) | VDR   | path:00982_4  | 0.003361044 |
| Steroid hormone receptors (NR3) | VDR   | path:00982_5  | 0.003361044 |
| Steroid hormone receptors (NR3) | VDR   | path:00982_6  | 0.008771608 |
| Steroid hormone receptors (NR3) | VDR   | path:00982_7  | 0.001635842 |
| Steroid hormone receptors (NR3) | VDR   | path:00982_8  | 0.001635842 |
| Steroid hormone receptors (NR3) | VDR   | path:00982_9  | 0.003361044 |
| Steroid hormone receptors (NR3) | VDR   | path:04012_1  | 0.008771608 |
| Steroid hormone receptors (NR3) | VDR   | path:04012_11 | 0.008771608 |
| Steroid hormone receptors (NR3) | VDR   | path:04012_12 | 0.008771608 |
| Steroid hormone receptors (NR3) | VDR   | path:04012_14 | 0.0090937   |
| Steroid hormone receptors (NR3) | VDR   | path:04012_4  | 0.008771608 |
| Steroid hormone receptors (NR3) | VDR   | path:04012_7  | 0.008771608 |
| Steroid hormone receptors (NR3) | VDR   | path:05200_9  | 0.008771608 |
| Steroid hormone receptors (NR3) | VDR   | path:05214_1  | 0.008771608 |
| Steroid hormone receptors (NR3) | VDR   | path:05214_10 | 0.009415594 |
| Steroid hormone receptors (NR3) | VDR   | path:05214_17 | 0.008771608 |



|                                 |       |               |             |
|---------------------------------|-------|---------------|-------------|
| Steroid hormone receptors (NR3) | VDR   | path:05214_2  | 0.008771608 |
| Steroid hormone receptors (NR3) | VDR   | path:05214_3  | 0.008771608 |
| Steroid hormone receptors (NR3) | VDR   | path:05214_4  | 0.008771608 |
| Steroid hormone receptors (NR3) | VDR   | path:05214_5  | 0.008771608 |
| Steroid hormone receptors (NR3) | VDR   | path:05214_6  | 0.008771608 |
| Steroid hormone receptors (NR3) | VDR   | path:05214_8  | 0.008771608 |
| Steroid hormone receptors (NR3) | VDR   | path:05215_11 | 0.009786942 |
| Steroid hormone receptors (NR3) | VDR   | path:05218_2  | 0.008771608 |
| Steroid hormone receptors (NR3) | VDR   | path:05223_6  | 0.008771608 |
| TCF-1                           | LEF1  | path:04310_6  | 0.000671935 |
| TCF-1                           | LEF1  | path:04310_7  | 0.000118706 |
| TCF-1                           | LEF1  | path:04916_11 | 0.00555092  |
| TCF-1                           | LEF1  | path:04916_3  | 0.002645905 |
| TCF-1                           | LEF1  | path:04916_8  | 0.007825657 |
| TCF-1                           | LEF1  | path:05200_31 | 1.30E-05    |
| TCF-1                           | LEF1  | path:05200_42 | 6.00E-05    |
| TCF-1                           | LEF1  | path:05200_50 | 0.003595279 |
| TCF-1                           | LEF1  | path:05210_10 | 0.002645905 |
| TCF-1                           | LEF1  | path:05210_12 | 1.30E-05    |
| TCF-1                           | LEF1  | path:05210_7  | 1.30E-05    |
| TCF-1                           | LEF1  | path:05213_1  | 2.72E-05    |
| TCF-1                           | LEF1  | path:05215_4  | 0.003117148 |
| TCF-1                           | LEF1  | path:05216_4  | 1.30E-05    |
| TCF-1                           | LEF1  | path:05221_1  | 5.77E-05    |
| TCF-1                           | LEF1  | path:05222_1  | 0.005057313 |
| TCF-1                           | LEF1  | path:05222_2  | 0.004566365 |
| TCF-1                           | LEF1  | path:05222_7  | 0.004078733 |
| TCF-1                           | TCF7  | path:04660_20 | 0.00669167  |
| Tissue-specific regulators      | FOXA2 | path:04610_3  | 0.000581017 |
| Tissue-specific regulators      | FOXA2 | path:04610_4  | 0.000581017 |
| Tissue-specific regulators      | FOXA2 | path:04610_6  | 0.000581017 |
| Tissue-specific regulators      | FOXA3 | path:00140_1  | 0.000327469 |
| Tissue-specific regulators      | FOXA3 | path:00140_11 | 0.000188543 |
| Tissue-specific regulators      | FOXA3 | path:00140_12 | 0.000502586 |

|                             |        |               |             |
|-----------------------------|--------|---------------|-------------|
| Tissue-specific regulators  | FOXA3  | path:00140_25 | 0.000327469 |
| Tissue-specific regulators  | FOXA3  | path:00140_26 | 0.000327469 |
| Tissue-specific regulators  | FOXA3  | path:00591_1  | 0.000312584 |
| Tissue-specific regulators  | FOXA3  | path:00830_2  | 0.000975791 |
| Tissue-specific regulators  | FOXA3  | path:00980_2  | 0.000327469 |
| Tissue-specific regulators  | FOXA3  | path:00982_10 | 7.28E-05    |
| Tissue-specific regulators  | FOXA3  | path:00982_11 | 2.48E-05    |
| Tissue-specific regulators  | FOXA3  | path:00982_2  | 5.58E-05    |
| Tissue-specific regulators  | FOXA3  | path:00982_3  | 2.48E-05    |
| Tissue-specific regulators  | FOXA3  | path:00982_4  | 5.10E-05    |
| Tissue-specific regulators  | FOXA3  | path:00982_5  | 5.10E-05    |
| Tissue-specific regulators  | FOXA3  | path:00982_6  | 0.000248984 |
| Tissue-specific regulators  | FOXA3  | path:00982_7  | 2.48E-05    |
| Tissue-specific regulators  | FOXA3  | path:00982_8  | 2.48E-05    |
| Tissue-specific regulators  | FOXA3  | path:00982_9  | 5.10E-05    |
| Ubiquitous bHLH-ZIP factors | MITF   | path:00350_1  | 0.00045151  |
| Ubiquitous bHLH-ZIP factors | MITF   | path:04916_3  | 1.75E-08    |
| Ubiquitous bHLH-ZIP factors | SREBF1 | path:00100_9  | 0.009882974 |
| Ubiquitous bHLH-ZIP factors | SREBF1 | path:03320_2  | 0.009882974 |
| Ubiquitous bHLH-ZIP factors | SREBF1 | path:04910_5  | 3.27E-05    |
| Ubiquitous bHLH-ZIP factors | SREBF1 | path:04910_6  | 0.00143191  |
| Ubiquitous factors          | SP1    | path:00120_1  | 0.006087664 |
| Ubiquitous factors          | SP1    | path:00120_2  | 0.003885876 |
| Ubiquitous factors          | SP1    | path:00120_3  | 0.003885876 |
| Ubiquitous factors          | SP1    | path:00140_1  | 0.001893526 |
| Ubiquitous factors          | SP1    | path:00140_10 | 1.44E-05    |
| Ubiquitous factors          | SP1    | path:00140_11 | 0.001534931 |
| Ubiquitous factors          | SP1    | path:00140_12 | 0.006087664 |
| Ubiquitous factors          | SP1    | path:00140_13 | 2.77E-05    |
| Ubiquitous factors          | SP1    | path:00140_14 | 0.003885876 |
| Ubiquitous factors          | SP1    | path:00140_16 | 0.000245716 |
| Ubiquitous factors          | SP1    | path:00140_18 | 0.000245716 |
| Ubiquitous factors          | SP1    | path:00140_19 | 2.77E-05    |
| Ubiquitous factors          | SP1    | path:00140_20 | 0.000441307 |

|                    |     |               |             |
|--------------------|-----|---------------|-------------|
| Ubiquitous factors | SP1 | path:00140_25 | 0.001893526 |
| Ubiquitous factors | SP1 | path:00140_3  | 1.44E-05    |
| Ubiquitous factors | SP1 | path:00140_4  | 1.44E-05    |
| Ubiquitous factors | SP1 | path:00140_5  | 5.07E-05    |
| Ubiquitous factors | SP1 | path:00140_6  | 8.66E-05    |
| Ubiquitous factors | SP1 | path:00140_7  | 2.77E-05    |
| Ubiquitous factors | SP1 | path:00140_8  | 0.000123921 |
| Ubiquitous factors | SP1 | path:00140_9  | 0.000123921 |
| Ubiquitous factors | SP1 | path:00240_16 | 0.005536058 |
| Ubiquitous factors | SP1 | path:00240_17 | 0.003391309 |
| Ubiquitous factors | SP1 | path:00240_2  | 0.001690362 |
| Ubiquitous factors | SP1 | path:00240_5  | 0.009002988 |
| Ubiquitous factors | SP1 | path:00330_1  | 0.005536058 |
| Ubiquitous factors | SP1 | path:00330_9  | 0.005126386 |
| Ubiquitous factors | SP1 | path:00350_2  | 0.006192277 |
| Ubiquitous factors | SP1 | path:00350_3  | 0.006192277 |
| Ubiquitous factors | SP1 | path:00980_2  | 0.001393247 |
| Ubiquitous factors | SP1 | path:00982_10 | 0.002175912 |
| Ubiquitous factors | SP1 | path:04010_10 | 0.003931316 |
| Ubiquitous factors | SP1 | path:04010_26 | 0.000441307 |
| Ubiquitous factors | SP1 | path:04010_5  | 0.000123921 |
| Ubiquitous factors | SP1 | path:04060_22 | 0.002149604 |
| Ubiquitous factors | SP1 | path:04060_32 | 0.001014956 |
| Ubiquitous factors | SP1 | path:04060_47 | 0.007433507 |
| Ubiquitous factors | SP1 | path:04110_1  | 0.00916136  |
| Ubiquitous factors | SP1 | path:04110_17 | 1.86E-10    |
| Ubiquitous factors | SP1 | path:04110_18 | 4.28E-11    |
| Ubiquitous factors | SP1 | path:04110_19 | 1.05E-10    |
| Ubiquitous factors | SP1 | path:04110_20 | 2.92E-09    |
| Ubiquitous factors | SP1 | path:04110_22 | 1.43E-05    |
| Ubiquitous factors | SP1 | path:04110_23 | 5.22E-09    |
| Ubiquitous factors | SP1 | path:04110_25 | 0.006192277 |
| Ubiquitous factors | SP1 | path:04110_26 | 7.70E-08    |
| Ubiquitous factors | SP1 | path:04110_27 | 2.92E-09    |

|                    |     |               |             |
|--------------------|-----|---------------|-------------|
| Ubiquitous factors | SP1 | path:04110_3  | 6.46E-09    |
| Ubiquitous factors | SP1 | path:04110_4  | 6.46E-09    |
| Ubiquitous factors | SP1 | path:04110_7  | 4.97E-07    |
| Ubiquitous factors | SP1 | path:04115_1  | 3.47E-10    |
| Ubiquitous factors | SP1 | path:04115_2  | 6.74E-05    |
| Ubiquitous factors | SP1 | path:04115_3  | 4.23E-05    |
| Ubiquitous factors | SP1 | path:04115_4  | 6.18E-06    |
| Ubiquitous factors | SP1 | path:04115_7  | 4.96E-05    |
| Ubiquitous factors | SP1 | path:04144_2  | 7.61E-06    |
| Ubiquitous factors | SP1 | path:04210_20 | 0.002175912 |
| Ubiquitous factors | SP1 | path:04210_24 | 0.001107767 |
| Ubiquitous factors | SP1 | path:04310_6  | 1.33E-05    |
| Ubiquitous factors | SP1 | path:04310_7  | 1.77E-05    |
| Ubiquitous factors | SP1 | path:04510_1  | 7.85E-13    |
| Ubiquitous factors | SP1 | path:04510_10 | 1.05E-10    |
| Ubiquitous factors | SP1 | path:04510_13 | 0.001603207 |
| Ubiquitous factors | SP1 | path:04510_15 | 0.001164758 |
| Ubiquitous factors | SP1 | path:04510_16 | 0.002771235 |
| Ubiquitous factors | SP1 | path:04510_17 | 0.000141426 |
| Ubiquitous factors | SP1 | path:04510_18 | 8.07E-08    |
| Ubiquitous factors | SP1 | path:04510_19 | 1.96E-12    |
| Ubiquitous factors | SP1 | path:04510_20 | 1.43E-05    |
| Ubiquitous factors | SP1 | path:04510_23 | 0.000718519 |
| Ubiquitous factors | SP1 | path:04510_24 | 0.002175912 |
| Ubiquitous factors | SP1 | path:04510_25 | 0.0024986   |
| Ubiquitous factors | SP1 | path:04510_4  | 6.74E-05    |
| Ubiquitous factors | SP1 | path:04510_5  | 0.0024986   |
| Ubiquitous factors | SP1 | path:04510_6  | 1.07E-10    |
| Ubiquitous factors | SP1 | path:04510_7  | 0.000448433 |
| Ubiquitous factors | SP1 | path:04510_8  | 6.16E-10    |
| Ubiquitous factors | SP1 | path:04512_10 | 2.01E-05    |
| Ubiquitous factors | SP1 | path:04512_11 | 5.55E-06    |
| Ubiquitous factors | SP1 | path:04512_12 | 1.66E-06    |
| Ubiquitous factors | SP1 | path:04512_13 | 7.86E-06    |

|                    |     |               |             |
|--------------------|-----|---------------|-------------|
| Ubiquitous factors | SP1 | path:04512_14 | 0.000101569 |
| Ubiquitous factors | SP1 | path:04512_18 | 0.000245716 |
| Ubiquitous factors | SP1 | path:04512_19 | 0.000549822 |
| Ubiquitous factors | SP1 | path:04512_20 | 0.002149604 |
| Ubiquitous factors | SP1 | path:04512_22 | 0.008608739 |
| Ubiquitous factors | SP1 | path:04512_27 | 0.00016592  |
| Ubiquitous factors | SP1 | path:04512_3  | 1.66E-05    |
| Ubiquitous factors | SP1 | path:04512_5  | 2.72E-07    |
| Ubiquitous factors | SP1 | path:04512_6  | 6.24E-07    |
| Ubiquitous factors | SP1 | path:04512_9  | 9.36E-06    |
| Ubiquitous factors | SP1 | path:04520_3  | 0.005126386 |
| Ubiquitous factors | SP1 | path:04520_5  | 0.001603207 |
| Ubiquitous factors | SP1 | path:04520_7  | 0.000412181 |
| Ubiquitous factors | SP1 | path:04540_13 | 1.22E-05    |
| Ubiquitous factors | SP1 | path:04610_3  | 9.21E-07    |
| Ubiquitous factors | SP1 | path:04610_4  | 5.55E-06    |
| Ubiquitous factors | SP1 | path:04610_6  | 9.21E-07    |
| Ubiquitous factors | SP1 | path:04610_7  | 0.000133832 |
| Ubiquitous factors | SP1 | path:04610_8  | 0.000203885 |
| Ubiquitous factors | SP1 | path:04620_18 | 0.000203885 |
| Ubiquitous factors | SP1 | path:04620_9  | 0.001893526 |
| Ubiquitous factors | SP1 | path:04630_1  | 0.000231547 |
| Ubiquitous factors | SP1 | path:04630_2  | 0.001390056 |
| Ubiquitous factors | SP1 | path:04630_3  | 1.97E-06    |
| Ubiquitous factors | SP1 | path:04630_4  | 5.95E-06    |
| Ubiquitous factors | SP1 | path:04650_20 | 4.84E-05    |
| Ubiquitous factors | SP1 | path:04650_7  | 0.008608739 |
| Ubiquitous factors | SP1 | path:04722_19 | 0.000718519 |
| Ubiquitous factors | SP1 | path:04810_29 | 7.92E-07    |
| Ubiquitous factors | SP1 | path:04912_8  | 1.33E-05    |
| Ubiquitous factors | SP1 | path:04940_4  | 0.007433507 |
| Ubiquitous factors | SP1 | path:05014_3  | 0.006087664 |
| Ubiquitous factors | SP1 | path:05014_4  | 0.008608739 |
| Ubiquitous factors | SP1 | path:05016_8  | 0.007433507 |

|                    |     |               |             |
|--------------------|-----|---------------|-------------|
| Ubiquitous factors | SP1 | path:05100_3  | 0.001014956 |
| Ubiquitous factors | SP1 | path:05140_10 | 0.008608739 |
| Ubiquitous factors | SP1 | path:05140_6  | 0.000245716 |
| Ubiquitous factors | SP1 | path:05142_10 | 0.001107767 |
| Ubiquitous factors | SP1 | path:05142_11 | 0.003931316 |
| Ubiquitous factors | SP1 | path:05142_17 | 0.003885876 |
| Ubiquitous factors | SP1 | path:05142_18 | 0.003885876 |
| Ubiquitous factors | SP1 | path:05142_20 | 0.000441307 |
| Ubiquitous factors | SP1 | path:05142_21 | 0.000718519 |
| Ubiquitous factors | SP1 | path:05142_4  | 0.001107767 |
| Ubiquitous factors | SP1 | path:05145_19 | 0.006087664 |
| Ubiquitous factors | SP1 | path:05145_21 | 0.001014956 |
| Ubiquitous factors | SP1 | path:05145_8  | 0.006087664 |
| Ubiquitous factors | SP1 | path:05146_1  | 1.23E-06    |
| Ubiquitous factors | SP1 | path:05146_2  | 7.92E-07    |
| Ubiquitous factors | SP1 | path:05146_5  | 0.002149604 |
| Ubiquitous factors | SP1 | path:05146_9  | 9.10E-07    |
| Ubiquitous factors | SP1 | path:05200_19 | 0.003935354 |
| Ubiquitous factors | SP1 | path:05200_20 | 0.003935354 |
| Ubiquitous factors | SP1 | path:05200_24 | 0.00927462  |
| Ubiquitous factors | SP1 | path:05200_29 | 9.21E-07    |
| Ubiquitous factors | SP1 | path:05200_3  | 2.01E-05    |
| Ubiquitous factors | SP1 | path:05200_31 | 0.000718519 |
| Ubiquitous factors | SP1 | path:05200_38 | 0.008608739 |
| Ubiquitous factors | SP1 | path:05200_4  | 0.000289957 |
| Ubiquitous factors | SP1 | path:05200_42 | 0.000718519 |
| Ubiquitous factors | SP1 | path:05200_47 | 2.07E-08    |
| Ubiquitous factors | SP1 | path:05200_48 | 1.33E-05    |
| Ubiquitous factors | SP1 | path:05200_50 | 5.07E-05    |
| Ubiquitous factors | SP1 | path:05200_51 | 5.54E-09    |
| Ubiquitous factors | SP1 | path:05200_52 | 1.55E-08    |
| Ubiquitous factors | SP1 | path:05200_53 | 4.11E-06    |
| Ubiquitous factors | SP1 | path:05200_56 | 0.001014956 |
| Ubiquitous factors | SP1 | path:05210_10 | 0.000441307 |

|                    |     |               |             |
|--------------------|-----|---------------|-------------|
| Ubiquitous factors | SP1 | path:05210_12 | 0.000718519 |
| Ubiquitous factors | SP1 | path:05210_7  | 0.000718519 |
| Ubiquitous factors | SP1 | path:05212_13 | 1.44E-05    |
| Ubiquitous factors | SP1 | path:05212_14 | 0.008608739 |
| Ubiquitous factors | SP1 | path:05214_12 | 1.33E-05    |
| Ubiquitous factors | SP1 | path:05214_13 | 1.18E-07    |
| Ubiquitous factors | SP1 | path:05214_14 | 2.07E-08    |
| Ubiquitous factors | SP1 | path:05214_15 | 9.21E-07    |
| Ubiquitous factors | SP1 | path:05214_2  | 0.005536058 |
| Ubiquitous factors | SP1 | path:05214_21 | 0.000245716 |
| Ubiquitous factors | SP1 | path:05214_5  | 0.005536058 |
| Ubiquitous factors | SP1 | path:05215_10 | 0.001164758 |
| Ubiquitous factors | SP1 | path:05215_7  | 0.008608739 |
| Ubiquitous factors | SP1 | path:05216_4  | 0.000441307 |
| Ubiquitous factors | SP1 | path:05218_4  | 0.000411461 |
| Ubiquitous factors | SP1 | path:05218_5  | 0.000133832 |
| Ubiquitous factors | SP1 | path:05218_6  | 1.33E-05    |
| Ubiquitous factors | SP1 | path:05218_7  | 9.21E-07    |
| Ubiquitous factors | SP1 | path:05218_8  | 7.27E-05    |
| Ubiquitous factors | SP1 | path:05219_3  | 0.000310459 |
| Ubiquitous factors | SP1 | path:05219_4  | 1.44E-05    |
| Ubiquitous factors | SP1 | path:05220_11 | 9.21E-07    |
| Ubiquitous factors | SP1 | path:05220_12 | 1.18E-07    |
| Ubiquitous factors | SP1 | path:05220_5  | 0.002149604 |
| Ubiquitous factors | SP1 | path:05220_8  | 1.33E-05    |
| Ubiquitous factors | SP1 | path:05220_9  | 2.07E-08    |
| Ubiquitous factors | SP1 | path:05221_1  | 0.006192277 |
| Ubiquitous factors | SP1 | path:05222_1  | 5.36E-07    |
| Ubiquitous factors | SP1 | path:05222_2  | 0.000133832 |
| Ubiquitous factors | SP1 | path:05222_4  | 2.01E-05    |
| Ubiquitous factors | SP1 | path:05222_7  | 0.001603207 |
| Ubiquitous factors | SP1 | path:05223_3  | 1.44E-05    |
| Ubiquitous factors | SP1 | path:05320_9  | 0.007433507 |
| Ubiquitous factors | SP1 | path:05330_5  | 0.007433507 |

|                    |     |               |             |
|--------------------|-----|---------------|-------------|
| Ubiquitous factors | SP1 | path:05332_2  | 0.007433507 |
| Ubiquitous factors | SP1 | path:05332_5  | 0.007433507 |
| Ubiquitous factors | SP1 | path:05414_2  | 1.77E-05    |
| Ubiquitous factors | SP3 | path:00120_1  | 0.000926143 |
| Ubiquitous factors | SP3 | path:00120_2  | 0.000618445 |
| Ubiquitous factors | SP3 | path:00120_3  | 0.000618445 |
| Ubiquitous factors | SP3 | path:00140_1  | 0.006217062 |
| Ubiquitous factors | SP3 | path:00140_10 | 4.16E-05    |
| Ubiquitous factors | SP3 | path:00140_11 | 5.63E-05    |
| Ubiquitous factors | SP3 | path:00140_12 | 0.000126279 |
| Ubiquitous factors | SP3 | path:00140_13 | 5.63E-05    |
| Ubiquitous factors | SP3 | path:00140_16 | 0.000926143 |
| Ubiquitous factors | SP3 | path:00140_18 | 0.000926143 |
| Ubiquitous factors | SP3 | path:00140_19 | 5.63E-05    |
| Ubiquitous factors | SP3 | path:00140_20 | 0.001366718 |
| Ubiquitous factors | SP3 | path:00140_25 | 0.006217062 |
| Ubiquitous factors | SP3 | path:00140_26 | 0.005691454 |
| Ubiquitous factors | SP3 | path:00140_3  | 4.16E-05    |
| Ubiquitous factors | SP3 | path:00140_4  | 4.16E-05    |
| Ubiquitous factors | SP3 | path:00140_5  | 8.41E-05    |
| Ubiquitous factors | SP3 | path:00140_6  | 0.000126279 |
| Ubiquitous factors | SP3 | path:00140_7  | 5.63E-05    |
| Ubiquitous factors | SP3 | path:00140_8  | 0.000618445 |
| Ubiquitous factors | SP3 | path:00140_9  | 0.000618445 |
| Ubiquitous factors | SP3 | path:00982_10 | 0.004572948 |
| Ubiquitous factors | SP3 | path:04060_43 | 0.002641876 |
| Ubiquitous factors | SP3 | path:04110_17 | 3.14E-07    |
| Ubiquitous factors | SP3 | path:04110_18 | 0.000128011 |
| Ubiquitous factors | SP3 | path:04110_19 | 2.26E-07    |
| Ubiquitous factors | SP3 | path:04110_20 | 4.71E-06    |
| Ubiquitous factors | SP3 | path:04110_22 | 0.001275861 |
| Ubiquitous factors | SP3 | path:04110_23 | 3.02E-05    |
| Ubiquitous factors | SP3 | path:04110_26 | 0.000307175 |
| Ubiquitous factors | SP3 | path:04110_27 | 4.71E-06    |



|                    |     |               |             |
|--------------------|-----|---------------|-------------|
| Ubiquitous factors | SP3 | path:04110_3  | 3.13E-05    |
| Ubiquitous factors | SP3 | path:04110_4  | 3.13E-05    |
| Ubiquitous factors | SP3 | path:04110_7  | 0.007662288 |
| Ubiquitous factors | SP3 | path:04115_1  | 0.00406173  |
| Ubiquitous factors | SP3 | path:04115_4  | 0.002218693 |
| Ubiquitous factors | SP3 | path:04144_2  | 0.000814667 |
| Ubiquitous factors | SP3 | path:04510_1  | 3.35E-07    |
| Ubiquitous factors | SP3 | path:04510_10 | 1.24E-07    |
| Ubiquitous factors | SP3 | path:04510_17 | 0.001366718 |
| Ubiquitous factors | SP3 | path:04510_18 | 6.32E-05    |
| Ubiquitous factors | SP3 | path:04510_19 | 6.37E-07    |
| Ubiquitous factors | SP3 | path:04510_20 | 0.004572948 |
| Ubiquitous factors | SP3 | path:04510_6  | 1.24E-07    |
| Ubiquitous factors | SP3 | path:04510_7  | 0.002877506 |
| Ubiquitous factors | SP3 | path:04510_8  | 1.24E-07    |
| Ubiquitous factors | SP3 | path:04512_10 | 0.000488202 |
| Ubiquitous factors | SP3 | path:04512_11 | 0.000758402 |
| Ubiquitous factors | SP3 | path:04512_12 | 3.50E-05    |
| Ubiquitous factors | SP3 | path:04512_13 | 5.52E-05    |
| Ubiquitous factors | SP3 | path:04512_14 | 0.000906884 |
| Ubiquitous factors | SP3 | path:04512_18 | 0.000926143 |
| Ubiquitous factors | SP3 | path:04512_19 | 0.000541628 |
| Ubiquitous factors | SP3 | path:04512_27 | 0.000423815 |
| Ubiquitous factors | SP3 | path:04512_3  | 3.50E-05    |
| Ubiquitous factors | SP3 | path:04512_5  | 2.26E-07    |
| Ubiquitous factors | SP3 | path:04512_6  | 5.63E-05    |
| Ubiquitous factors | SP3 | path:04512_9  | 7.41E-05    |
| Ubiquitous factors | SP3 | path:04610_7  | 0.004572948 |
| Ubiquitous factors | SP3 | path:04610_8  | 0.005691454 |
| Ubiquitous factors | SP3 | path:04810_29 | 0.000814667 |
| Ubiquitous factors | SP3 | path:05144_3  | 0.002641876 |
| Ubiquitous factors | SP3 | path:05146_1  | 1.74E-06    |
| Ubiquitous factors | SP3 | path:05146_2  | 1.13E-06    |
| Ubiquitous factors | SP3 | path:05146_9  | 1.78E-05    |

|                    |     |               |             |
|--------------------|-----|---------------|-------------|
| Ubiquitous factors | SP3 | path:05200_47 | 0.000618445 |
| Ubiquitous factors | SP3 | path:05200_48 | 0.00015602  |
| Ubiquitous factors | SP3 | path:05200_51 | 8.65E-07    |
| Ubiquitous factors | SP3 | path:05200_52 | 1.23E-05    |
| Ubiquitous factors | SP3 | path:05200_53 | 0.003634657 |
| Ubiquitous factors | SP3 | path:05212_13 | 0.001366718 |
| Ubiquitous factors | SP3 | path:05214_12 | 0.00015602  |
| Ubiquitous factors | SP3 | path:05214_13 | 3.02E-05    |
| Ubiquitous factors | SP3 | path:05214_14 | 0.000618445 |
| Ubiquitous factors | SP3 | path:05214_15 | 5.63E-05    |
| Ubiquitous factors | SP3 | path:05218_6  | 0.00015602  |
| Ubiquitous factors | SP3 | path:05218_7  | 5.63E-05    |
| Ubiquitous factors | SP3 | path:05218_8  | 0.000758402 |
| Ubiquitous factors | SP3 | path:05219_3  | 0.00677863  |
| Ubiquitous factors | SP3 | path:05219_4  | 4.16E-05    |
| Ubiquitous factors | SP3 | path:05220_11 | 5.63E-05    |
| Ubiquitous factors | SP3 | path:05220_12 | 3.02E-05    |
| Ubiquitous factors | SP3 | path:05220_8  | 0.00015602  |
| Ubiquitous factors | SP3 | path:05220_9  | 0.000618445 |
| Ubiquitous factors | SP3 | path:05222_1  | 0.005691454 |
| Ubiquitous factors | SP3 | path:05223_3  | 0.001366718 |
| Ubiquitous factors | SP3 | path:05414_2  | 0.00143924  |
| Ubiquitous factors | YY1 | path:00140_10 | 0.009417621 |
| Ubiquitous factors | YY1 | path:00140_13 | 0.009975361 |
| Ubiquitous factors | YY1 | path:00140_14 | 0.00758906  |
| Ubiquitous factors | YY1 | path:00140_16 | 0.009417621 |
| Ubiquitous factors | YY1 | path:00140_18 | 0.009417621 |
| Ubiquitous factors | YY1 | path:00140_19 | 0.009975361 |
| Ubiquitous factors | YY1 | path:00140_20 | 0.009417621 |
| Ubiquitous factors | YY1 | path:00140_3  | 0.009417621 |
| Ubiquitous factors | YY1 | path:00140_4  | 0.009417621 |
| Ubiquitous factors | YY1 | path:00140_7  | 0.009975361 |
| Ubiquitous factors | YY1 | path:00140_8  | 0.00758906  |
| Ubiquitous factors | YY1 | path:00140_9  | 0.00758906  |

|                    |     |               |             |
|--------------------|-----|---------------|-------------|
| Ubiquitous factors | YY1 | path:04110_17 | 0.000485911 |
| Ubiquitous factors | YY1 | path:04110_19 | 0.000476218 |
| Ubiquitous factors | YY1 | path:04110_20 | 0.003725909 |
| Ubiquitous factors | YY1 | path:04110_23 | 0.005922984 |
| Ubiquitous factors | YY1 | path:04110_27 | 0.003725909 |
| Ubiquitous factors | YY1 | path:04110_7  | 0.00758906  |
| Ubiquitous factors | YY1 | path:04115_4  | 0.009975361 |
| Ubiquitous factors | YY1 | path:04650_20 | 0.007430866 |
| Ubiquitous factors | YY1 | path:04650_7  | 0.009417621 |
| Ubiquitous factors | YY1 | path:05200_47 | 0.00758906  |
| Ubiquitous factors | YY1 | path:05200_48 | 0.005151692 |
| Ubiquitous factors | YY1 | path:05200_51 | 0.00043761  |
| Ubiquitous factors | YY1 | path:05210_10 | 0.009417621 |
| Ubiquitous factors | YY1 | path:05212_13 | 0.009417621 |
| Ubiquitous factors | YY1 | path:05214_12 | 0.005151692 |
| Ubiquitous factors | YY1 | path:05214_13 | 0.000410896 |
| Ubiquitous factors | YY1 | path:05214_14 | 0.00758906  |
| Ubiquitous factors | YY1 | path:05214_15 | 0.009975361 |
| Ubiquitous factors | YY1 | path:05218_6  | 0.005151692 |
| Ubiquitous factors | YY1 | path:05218_7  | 0.009975361 |
| Ubiquitous factors | YY1 | path:05218_8  | 0.003139302 |
| Ubiquitous factors | YY1 | path:05219_3  | 0.003725909 |
| Ubiquitous factors | YY1 | path:05219_4  | 0.009417621 |
| Ubiquitous factors | YY1 | path:05220_11 | 0.009975361 |
| Ubiquitous factors | YY1 | path:05220_12 | 0.000410896 |
| Ubiquitous factors | YY1 | path:05220_8  | 0.005151692 |
| Ubiquitous factors | YY1 | path:05220_9  | 0.00758906  |
| Ubiquitous factors | YY1 | path:05223_3  | 0.009417621 |

---

**Table S5. The detailed information of the co-tissue TFs regulated sub-pathways.**

| <b>Tissues</b> | <b>TF</b> | <b>P_Value</b> | <b>Subpathway</b> |
|----------------|-----------|----------------|-------------------|
| BL             | TFAP2A    | 0.005723968    | path:04020_2      |
| BL             | TFAP2A    | 0.003857334    | path:04080_7      |
| BL             | TFAP2A    | 0.00057548     | path:04144_2      |
| BL             | TFAP2A    | 0.001269093    | path:04510_10     |
| BL             | TFAP2A    | 0.005458314    | path:04510_15     |
| BL             | TFAP2A    | 0.003332624    | path:04510_16     |
| BL             | TFAP2A    | 3.81E-05       | path:04510_17     |
| BL             | TFAP2A    | 1.42E-05       | path:04510_18     |
| BL             | TFAP2A    | 0.007739985    | path:04510_25     |
| BL             | TFAP2A    | 0.007739985    | path:04510_5      |
| BL             | TFAP2A    | 0.001276164    | path:04510_6      |
| BL             | TFAP2A    | 8.35E-05       | path:04510_7      |
| BL             | TFAP2A    | 0.001271633    | path:04510_8      |
| BL             | TFAP2A    | 0.002407854    | path:04520_2      |
| BL             | TFAP2A    | 0.001262516    | path:04520_3      |
| BL             | TFAP2A    | 0.00057548     | path:04520_5      |
| BL             | TFAP2A    | 0.001262516    | path:04520_7      |
| BL             | TFAP2A    | 0.009046641    | path:04520_9      |
| BL             | TFAP2A    | 0.003857334    | path:04912_8      |
| BL             | TFAP2A    | 2.20E-05       | path:05200_10     |
| BL             | TFAP2A    | 1.91E-05       | path:05200_11     |
| BL             | TFAP2A    | 1.91E-05       | path:05200_12     |
| BL             | TFAP2A    | 6.62E-06       | path:05200_15     |
| BL             | TFAP2A    | 0.000448647    | path:05200_21     |
| BL             | TFAP2A    | 8.35E-05       | path:05200_29     |
| BL             | TFAP2A    | 1.91E-05       | path:05200_4      |
| BL             | TFAP2A    | 2.22E-05       | path:05200_5      |
| BL             | TFAP2A    | 2.16E-06       | path:05200_8      |
| BL             | TFAP2A    | 0.002699451    | path:05212_11     |
| BL             | TFAP2A    | 0.003332624    | path:05212_12     |
| BL             | TFAP2A    | 0.004058678    | path:05214_1      |
| BL             | TFAP2A    | 0.000317116    | path:05214_10     |

|    |        |             |               |
|----|--------|-------------|---------------|
| BL | TFAP2A | 0.002407854 | path:05214_11 |
| BL | TFAP2A | 0.007739985 | path:05214_16 |
| BL | TFAP2A | 0.004058678 | path:05214_17 |
| BL | TFAP2A | 0.004058678 | path:05214_2  |
| BL | TFAP2A | 0.004058678 | path:05214_3  |
| BL | TFAP2A | 0.004058678 | path:05214_4  |
| BL | TFAP2A | 0.004058678 | path:05214_5  |
| BL | TFAP2A | 0.004058678 | path:05214_6  |
| BL | TFAP2A | 0.007739985 | path:05214_7  |
| BL | TFAP2A | 0.004058678 | path:05214_8  |
| BL | TFAP2A | 0.000317116 | path:05215_10 |
| BL | TFAP2A | 0.000436788 | path:05215_11 |
| BL | TFAP2A | 0.001124594 | path:05215_8  |
| BL | TFAP2A | 0.002407854 | path:05219_2  |
| BL | TP53   | 0.007702858 | path:04010_15 |
| BL | TP53   | 0.009062653 | path:04010_16 |
| BL | TP53   | 0.007443002 | path:04010_21 |
| BL | TP53   | 0.002466645 | path:04012_12 |
| BL | TP53   | 2.55E-11    | path:04110_1  |
| BL | TP53   | 3.28E-07    | path:04110_17 |
| BL | TP53   | 1.48E-05    | path:04110_19 |
| BL | TP53   | 0.001943417 | path:04110_20 |
| BL | TP53   | 7.56E-05    | path:04110_22 |
| BL | TP53   | 0.000198814 | path:04110_23 |
| BL | TP53   | 0.001943417 | path:04110_27 |
| BL | TP53   | 0.000210553 | path:04110_3  |
| BL | TP53   | 0.004511216 | path:04110_4  |
| BL | TP53   | 4.42E-09    | path:04110_7  |
| BL | TP53   | 0.004291125 | path:04110_8  |
| BL | TP53   | 0           | path:04115_1  |
| BL | TP53   | 0           | path:04115_2  |
| BL | TP53   | 0           | path:04115_3  |
| BL | TP53   | 0           | path:04115_4  |
| BL | TP53   | 0           | path:04115_7  |

|    |      |             |               |
|----|------|-------------|---------------|
| BL | TP53 | 0.000421718 | path:04210_20 |
| BL | TP53 | 0.000275763 | path:04210_23 |
| BL | TP53 | 0.000275763 | path:04210_24 |
| BL | TP53 | 0.009131774 | path:04510_10 |
| BL | TP53 | 0.004511216 | path:04510_15 |
| BL | TP53 | 0.002466645 | path:04510_16 |
| BL | TP53 | 0.000580605 | path:04510_17 |
| BL | TP53 | 0.001774645 | path:04510_18 |
| BL | TP53 | 0.006951959 | path:04510_25 |
| BL | TP53 | 0.006951959 | path:04510_5  |
| BL | TP53 | 0.009576653 | path:04510_6  |
| BL | TP53 | 0.001110697 | path:04510_7  |
| BL | TP53 | 0.00935253  | path:04510_8  |
| BL | TP53 | 0.009062653 | path:04621_7  |
| BL | TP53 | 0.000218217 | path:04722_19 |
| BL | TP53 | 0.002756828 | path:04912_8  |
| BL | TP53 | 0.009062653 | path:05014_4  |
| BL | TP53 | 0.007459365 | path:05160_12 |
| BL | TP53 | 0.009062653 | path:05160_15 |
| BL | TP53 | 0.000338058 | path:05200_10 |
| BL | TP53 | 0.000275763 | path:05200_11 |
| BL | TP53 | 0.000275763 | path:05200_12 |
| BL | TP53 | 0.000968321 | path:05200_15 |
| BL | TP53 | 0.00392722  | path:05200_17 |
| BL | TP53 | 0.002997803 | path:05200_19 |
| BL | TP53 | 0.00011707  | path:05200_20 |
| BL | TP53 | 0.000275763 | path:05200_4  |
| BL | TP53 | 7.56E-05    | path:05200_47 |
| BL | TP53 | 1.95E-05    | path:05200_48 |
| BL | TP53 | 0.000367024 | path:05200_5  |
| BL | TP53 | 0.000172314 | path:05200_51 |
| BL | TP53 | 1.95E-05    | path:05200_8  |
| BL | TP53 | 0.007459365 | path:05213_2  |
| BL | TP53 | 0.003580594 | path:05214_1  |

|             |      |             |               |
|-------------|------|-------------|---------------|
| BL          | TP53 | 0.000210553 | path:05214_10 |
| BL          | TP53 | 0.001774645 | path:05214_11 |
| BL          | TP53 | 1.95E-05    | path:05214_12 |
| BL          | TP53 | 0.00011707  | path:05214_13 |
| BL          | TP53 | 7.56E-05    | path:05214_14 |
| BL          | TP53 | 0.003580594 | path:05214_4  |
| BL          | TP53 | 0.004511216 | path:05215_10 |
| BL          | TP53 | 0.000275763 | path:05215_11 |
| BL          | TP53 | 0.00331496  | path:05215_3  |
| BL          | TP53 | 0.002754132 | path:05218_2  |
| BL          | TP53 | 0.001774645 | path:05218_5  |
| BL          | TP53 | 1.95E-05    | path:05218_6  |
| BL          | TP53 | 0.001385048 | path:05218_8  |
| BL          | TP53 | 0.001691972 | path:05219_3  |
| BL          | TP53 | 0.009062653 | path:05219_4  |
| BL          | TP53 | 0.00011707  | path:05220_12 |
| BL          | TP53 | 1.95E-05    | path:05220_8  |
| BL          | TP53 | 7.56E-05    | path:05220_9  |
| bone marrow | AKNA | 6.20E-07    | path:04060_31 |
| bone marrow | AKNA | 6.20E-07    | path:04514_10 |
| bone marrow | AKNA | 6.20E-07    | path:04514_11 |
| bone marrow | AKNA | 6.20E-07    | path:04514_12 |
| bone marrow | AKNA | 6.20E-07    | path:04514_78 |
| bone marrow | AKNA | 6.20E-07    | path:04514_9  |
| bone marrow | AKNA | 6.20E-07    | path:04672_2  |
| bone marrow | AKNA | 6.20E-07    | path:05144_9  |
| bone marrow | AKNA | 6.20E-07    | path:05145_20 |
| bone marrow | AKNA | 6.20E-07    | path:05310_2  |
| bone marrow | AKNA | 6.20E-07    | path:05320_2  |
| bone marrow | AKNA | 6.20E-07    | path:05320_5  |
| bone marrow | AKNA | 6.20E-07    | path:05322_7  |
| bone marrow | AKNA | 6.20E-07    | path:05330_12 |
| bone marrow | AKNA | 6.20E-07    | path:05330_3  |
| bone marrow | AKNA | 6.20E-07    | path:05416_3  |

|             |      |             |               |
|-------------|------|-------------|---------------|
| bone marrow | IRF5 | 0.005011517 | path:04060_38 |
| bone marrow | IRF5 | 0.005011517 | path:04620_11 |
| bone marrow | IRF5 | 0.005011517 | path:04620_2  |
| bone marrow | IRF5 | 0.005011517 | path:04650_6  |
| bone marrow | IRF5 | 0.005011517 | path:05160_6  |
| bone marrow | SPI1 | 0.00153244  | path:04060_41 |
| bone marrow | SPI1 | 0.005348786 | path:04145_2  |
| bone marrow | SPI1 | 3.11E-06    | path:04145_6  |
| bone marrow | SPI1 | 0.007630608 | path:04514_55 |
| bone marrow | SPI1 | 0.003570772 | path:04514_62 |
| bone marrow | SPI1 | 0.008430928 | path:04650_10 |
| bone marrow | SPI1 | 0.007340609 | path:04650_12 |
| bone marrow | SPI1 | 0.003805584 | path:04650_13 |
| bone marrow | SPI1 | 0.003570772 | path:04670_10 |
| bone marrow | SPI1 | 0.00153244  | path:04670_14 |
| bone marrow | SPI1 | 0.000961365 | path:04670_15 |
| bone marrow | SPI1 | 0.000252274 | path:04670_2  |
| bone marrow | SPI1 | 0.000110411 | path:05140_4  |
| bone marrow | SPI1 | 0.005348786 | path:05150_17 |
| bone marrow | SPI1 | 0.000902646 | path:05200_43 |
| bone marrow | TP53 | 0.007702858 | path:04010_15 |
| bone marrow | TP53 | 0.009062653 | path:04010_16 |
| bone marrow | TP53 | 0.007443002 | path:04010_21 |
| bone marrow | TP53 | 0.002466645 | path:04012_12 |
| bone marrow | TP53 | 2.55E-11    | path:04110_1  |
| bone marrow | TP53 | 3.28E-07    | path:04110_17 |
| bone marrow | TP53 | 1.48E-05    | path:04110_19 |
| bone marrow | TP53 | 0.001943417 | path:04110_20 |
| bone marrow | TP53 | 7.56E-05    | path:04110_22 |
| bone marrow | TP53 | 0.000198814 | path:04110_23 |
| bone marrow | TP53 | 0.001943417 | path:04110_27 |
| bone marrow | TP53 | 0.000210553 | path:04110_3  |
| bone marrow | TP53 | 0.004511216 | path:04110_4  |
| bone marrow | TP53 | 4.42E-09    | path:04110_7  |



|             |      |             |               |
|-------------|------|-------------|---------------|
| bone marrow | TP53 | 0.004291125 | path:04110_8  |
| bone marrow | TP53 | 0           | path:04115_1  |
| bone marrow | TP53 | 0           | path:04115_2  |
| bone marrow | TP53 | 0           | path:04115_3  |
| bone marrow | TP53 | 0           | path:04115_4  |
| bone marrow | TP53 | 0           | path:04115_7  |
| bone marrow | TP53 | 0.000421718 | path:04210_20 |
| bone marrow | TP53 | 0.000275763 | path:04210_23 |
| bone marrow | TP53 | 0.000275763 | path:04210_24 |
| bone marrow | TP53 | 0.009131774 | path:04510_10 |
| bone marrow | TP53 | 0.004511216 | path:04510_15 |
| bone marrow | TP53 | 0.002466645 | path:04510_16 |
| bone marrow | TP53 | 0.000580605 | path:04510_17 |
| bone marrow | TP53 | 0.001774645 | path:04510_18 |
| bone marrow | TP53 | 0.006951959 | path:04510_25 |
| bone marrow | TP53 | 0.006951959 | path:04510_5  |
| bone marrow | TP53 | 0.009576653 | path:04510_6  |
| bone marrow | TP53 | 0.001110697 | path:04510_7  |
| bone marrow | TP53 | 0.00935253  | path:04510_8  |
| bone marrow | TP53 | 0.009062653 | path:04621_7  |
| bone marrow | TP53 | 0.000218217 | path:04722_19 |
| bone marrow | TP53 | 0.002756828 | path:04912_8  |
| bone marrow | TP53 | 0.009062653 | path:05014_4  |
| bone marrow | TP53 | 0.007459365 | path:05160_12 |
| bone marrow | TP53 | 0.009062653 | path:05160_15 |
| bone marrow | TP53 | 0.000338058 | path:05200_10 |
| bone marrow | TP53 | 0.000275763 | path:05200_11 |
| bone marrow | TP53 | 0.000275763 | path:05200_12 |
| bone marrow | TP53 | 0.000968321 | path:05200_15 |
| bone marrow | TP53 | 0.00392722  | path:05200_17 |
| bone marrow | TP53 | 0.002997803 | path:05200_19 |
| bone marrow | TP53 | 0.00011707  | path:05200_20 |
| bone marrow | TP53 | 0.000275763 | path:05200_4  |
| bone marrow | TP53 | 7.56E-05    | path:05200_47 |

|             |       |             |               |
|-------------|-------|-------------|---------------|
| bone marrow | TP53  | 1.95E-05    | path:05200_48 |
| bone marrow | TP53  | 0.000367024 | path:05200_5  |
| bone marrow | TP53  | 0.000172314 | path:05200_51 |
| bone marrow | TP53  | 1.95E-05    | path:05200_8  |
| bone marrow | TP53  | 0.007459365 | path:05213_2  |
| bone marrow | TP53  | 0.003580594 | path:05214_1  |
| bone marrow | TP53  | 0.000210553 | path:05214_10 |
| bone marrow | TP53  | 0.001774645 | path:05214_11 |
| bone marrow | TP53  | 1.95E-05    | path:05214_12 |
| bone marrow | TP53  | 0.00011707  | path:05214_13 |
| bone marrow | TP53  | 7.56E-05    | path:05214_14 |
| bone marrow | TP53  | 0.003580594 | path:05214_4  |
| bone marrow | TP53  | 0.004511216 | path:05215_10 |
| bone marrow | TP53  | 0.000275763 | path:05215_11 |
| bone marrow | TP53  | 0.00331496  | path:05215_3  |
| bone marrow | TP53  | 0.002754132 | path:05218_2  |
| bone marrow | TP53  | 0.001774645 | path:05218_5  |
| bone marrow | TP53  | 1.95E-05    | path:05218_6  |
| bone marrow | TP53  | 0.001385048 | path:05218_8  |
| bone marrow | TP53  | 0.001691972 | path:05219_3  |
| bone marrow | TP53  | 0.009062653 | path:05219_4  |
| bone marrow | TP53  | 0.00011707  | path:05220_12 |
| bone marrow | TP53  | 1.95E-05    | path:05220_8  |
| bone marrow | TP53  | 7.56E-05    | path:05220_9  |
| brain       | CREB1 | 0.004288489 | path:04514_1  |
| brain       | CREB1 | 0.004288489 | path:04514_3  |
| brain       | CREB1 | 0.004288489 | path:04612_3  |
| brain       | CREB1 | 0.004131401 | path:04620_12 |
| brain       | CREB1 | 0.004131401 | path:04620_16 |
| brain       | CREB1 | 0.001277819 | path:04620_17 |
| brain       | CREB1 | 0.000627719 | path:04620_18 |
| brain       | CREB1 | 0.001277819 | path:04620_22 |
| brain       | CREB1 | 0.001277819 | path:04620_9  |
| brain       | CREB1 | 0.004131401 | path:04672_4  |

|       |        |             |               |
|-------|--------|-------------|---------------|
| brain | CREB1  | 0.004131401 | path:04672_5  |
| brain | CREB1  | 0.004131401 | path:04940_1  |
| brain | CREB1  | 0.004288489 | path:05150_14 |
| brain | CREB1  | 0.009649083 | path:05200_18 |
| brain | CREB1  | 0.004131401 | path:05310_1  |
| brain | CREB1  | 0.004131401 | path:05310_3  |
| brain | CREB1  | 0.004131401 | path:05320_1  |
| brain | CREB1  | 0.004131401 | path:05320_3  |
| brain | CREB1  | 0.004131401 | path:05320_4  |
| brain | CREB1  | 0.004131401 | path:05320_6  |
| brain | CREB1  | 0.004131401 | path:05322_5  |
| brain | CREB1  | 0.004131401 | path:05322_6  |
| brain | CREB1  | 0.004131401 | path:05330_1  |
| brain | CREB1  | 0.004131401 | path:05330_2  |
| brain | CREB1  | 0.004131401 | path:05330_4  |
| brain | CREB1  | 0.004131401 | path:05332_1  |
| brain | CREB1  | 0.004131401 | path:05416_4  |
| brain | NR4A1  | 0.00077713  | path:00140_10 |
| brain | NR4A1  | 6.42E-06    | path:00140_13 |
| brain | NR4A1  | 0.00077713  | path:00140_14 |
| brain | NR4A1  | 0.00077713  | path:00140_16 |
| brain | NR4A1  | 0.00077713  | path:00140_18 |
| brain | NR4A1  | 0.000832486 | path:00140_19 |
| brain | NR4A1  | 0.00077713  | path:00140_20 |
| brain | NR4A1  | 0.00077713  | path:00140_3  |
| brain | NR4A1  | 0.00077713  | path:00140_4  |
| brain | NR4A1  | 0.000960385 | path:00140_5  |
| brain | NR4A1  | 0.001089761 | path:00140_6  |
| brain | NR4A1  | 0.000832486 | path:00140_7  |
| brain | NR4A1  | 0.00077713  | path:00140_8  |
| brain | NR4A1  | 0.00077713  | path:00140_9  |
| brain | SREBF1 | 0.009882974 | path:00100_9  |
| brain | SREBF1 | 0.009882974 | path:03320_2  |
| brain | SREBF1 | 3.27E-05    | path:04910_5  |

|       |        |             |               |
|-------|--------|-------------|---------------|
| brain | SREBF1 | 0.00143191  | path:04910_6  |
| brain | TP53   | 0.007702858 | path:04010_15 |
| brain | TP53   | 0.009062653 | path:04010_16 |
| brain | TP53   | 0.007443002 | path:04010_21 |
| brain | TP53   | 0.002466645 | path:04012_12 |
| brain | TP53   | 2.55E-11    | path:04110_1  |
| brain | TP53   | 3.28E-07    | path:04110_17 |
| brain | TP53   | 1.48E-05    | path:04110_19 |
| brain | TP53   | 0.001943417 | path:04110_20 |
| brain | TP53   | 7.56E-05    | path:04110_22 |
| brain | TP53   | 0.000198814 | path:04110_23 |
| brain | TP53   | 0.001943417 | path:04110_27 |
| brain | TP53   | 0.000210553 | path:04110_3  |
| brain | TP53   | 0.004511216 | path:04110_4  |
| brain | TP53   | 4.42E-09    | path:04110_7  |
| brain | TP53   | 0.004291125 | path:04110_8  |
| brain | TP53   | 0           | path:04115_1  |
| brain | TP53   | 0           | path:04115_2  |
| brain | TP53   | 0           | path:04115_3  |
| brain | TP53   | 0           | path:04115_4  |
| brain | TP53   | 0           | path:04115_7  |
| brain | TP53   | 0.000421718 | path:04210_20 |
| brain | TP53   | 0.000275763 | path:04210_23 |
| brain | TP53   | 0.000275763 | path:04210_24 |
| brain | TP53   | 0.009131774 | path:04510_10 |
| brain | TP53   | 0.004511216 | path:04510_15 |
| brain | TP53   | 0.002466645 | path:04510_16 |
| brain | TP53   | 0.000580605 | path:04510_17 |
| brain | TP53   | 0.001774645 | path:04510_18 |
| brain | TP53   | 0.006951959 | path:04510_25 |
| brain | TP53   | 0.006951959 | path:04510_5  |
| brain | TP53   | 0.009576653 | path:04510_6  |
| brain | TP53   | 0.001110697 | path:04510_7  |
| brain | TP53   | 0.00935253  | path:04510_8  |

|       |      |             |               |
|-------|------|-------------|---------------|
| brain | TP53 | 0.009062653 | path:04621_7  |
| brain | TP53 | 0.000218217 | path:04722_19 |
| brain | TP53 | 0.002756828 | path:04912_8  |
| brain | TP53 | 0.009062653 | path:05014_4  |
| brain | TP53 | 0.007459365 | path:05160_12 |
| brain | TP53 | 0.009062653 | path:05160_15 |
| brain | TP53 | 0.000338058 | path:05200_10 |
| brain | TP53 | 0.000275763 | path:05200_11 |
| brain | TP53 | 0.000275763 | path:05200_12 |
| brain | TP53 | 0.000968321 | path:05200_15 |
| brain | TP53 | 0.00392722  | path:05200_17 |
| brain | TP53 | 0.002997803 | path:05200_19 |
| brain | TP53 | 0.00011707  | path:05200_20 |
| brain | TP53 | 0.000275763 | path:05200_4  |
| brain | TP53 | 7.56E-05    | path:05200_47 |
| brain | TP53 | 1.95E-05    | path:05200_48 |
| brain | TP53 | 0.000367024 | path:05200_5  |
| brain | TP53 | 0.000172314 | path:05200_51 |
| brain | TP53 | 1.95E-05    | path:05200_8  |
| brain | TP53 | 0.007459365 | path:05213_2  |
| brain | TP53 | 0.003580594 | path:05214_1  |
| brain | TP53 | 0.000210553 | path:05214_10 |
| brain | TP53 | 0.001774645 | path:05214_11 |
| brain | TP53 | 1.95E-05    | path:05214_12 |
| brain | TP53 | 0.00011707  | path:05214_13 |
| brain | TP53 | 7.56E-05    | path:05214_14 |
| brain | TP53 | 0.003580594 | path:05214_4  |
| brain | TP53 | 0.004511216 | path:05215_10 |
| brain | TP53 | 0.000275763 | path:05215_11 |
| brain | TP53 | 0.00331496  | path:05215_3  |
| brain | TP53 | 0.002754132 | path:05218_2  |
| brain | TP53 | 0.001774645 | path:05218_5  |
| brain | TP53 | 1.95E-05    | path:05218_6  |
| brain | TP53 | 0.001385048 | path:05218_8  |

|        |       |             |               |
|--------|-------|-------------|---------------|
| brain  | TP53  | 0.001691972 | path:05219_3  |
| brain  | TP53  | 0.009062653 | path:05219_4  |
| brain  | TP53  | 0.00011707  | path:05220_12 |
| brain  | TP53  | 1.95E-05    | path:05220_8  |
| brain  | TP53  | 7.56E-05    | path:05220_9  |
| breast | ETV4  | 0.000820491 | path:05200_29 |
| breast | HNF1A | 0.008512637 | path:00120_5  |
| breast | HNF1A | 0.008512637 | path:00140_1  |
| breast | HNF1A | 3.95E-05    | path:00140_12 |
| breast | HNF1A | 0.008512637 | path:00140_22 |
| breast | HNF1A | 0.008512637 | path:00140_23 |
| breast | HNF1A | 0.008512637 | path:00140_24 |
| breast | HNF1A | 0.008512637 | path:00140_25 |
| breast | HNF1A | 0.008512637 | path:00140_26 |
| breast | HNF1A | 0.008512637 | path:00982_6  |
| breast | HNF1A | 0.008512637 | path:04610_6  |
| breast | TCF7  | 0.00669167  | path:04660_20 |
| breast | TP63  | 2.23E-05    | path:04110_1  |
| breast | TP63  | 8.12E-05    | path:04110_7  |
| breast | TP63  | 8.12E-05    | path:04115_1  |
| breast | TP63  | 8.12E-05    | path:04115_2  |
| breast | TP63  | 8.12E-05    | path:04115_3  |
| breast | TP63  | 8.12E-05    | path:04115_4  |
| breast | TP63  | 8.12E-05    | path:04115_7  |
| breast | TP63  | 0.003115907 | path:05200_17 |
| breast | TP63  | 0.002783081 | path:05200_19 |
| breast | TP63  | 0.002783081 | path:05200_20 |
| breast | TP63  | 0.000159403 | path:05200_47 |
| breast | TP63  | 8.12E-05    | path:05200_48 |
| breast | TP63  | 8.12E-05    | path:05214_12 |
| breast | TP63  | 0.000159403 | path:05214_14 |
| breast | TP63  | 0.004120782 | path:05215_11 |
| breast | TP63  | 0.002837304 | path:05215_3  |
| breast | TP63  | 8.12E-05    | path:05218_6  |

|        |       |             |               |
|--------|-------|-------------|---------------|
| breast | TP63  | 8.12E-05    | path:05220_8  |
| breast | TP63  | 0.000159403 | path:05220_9  |
| Caco   | GATA4 | 0.001238279 | path:00140_10 |
| Caco   | GATA4 | 0.001238279 | path:00140_13 |
| Caco   | GATA4 | 0.001238279 | path:00140_16 |
| Caco   | GATA4 | 0.001238279 | path:00140_18 |
| Caco   | GATA4 | 0.001238279 | path:00140_19 |
| Caco   | GATA4 | 0.001238279 | path:00140_3  |
| Caco   | GATA4 | 0.001238279 | path:00140_4  |
| Caco   | GATA4 | 0.001470007 | path:00140_5  |
| Caco   | GATA4 | 0.001710596 | path:00140_6  |
| Caco   | GATA4 | 0.001238279 | path:00140_7  |
| Caco   | GATA4 | 0.001226506 | path:00140_8  |
| Caco   | GATA4 | 0.001226506 | path:00140_9  |
| Caco   | GATA4 | 0.00061049  | path:00590_1  |
| Caco   | GATA4 | 0.00061049  | path:00590_2  |
| Caco   | GATA4 | 0.00061049  | path:00590_3  |
| Caco   | GATA4 | 0.00061049  | path:00590_4  |
| Caco   | GATA4 | 0.00061049  | path:00591_1  |
| Caco   | GATA4 | 0.00061049  | path:00980_2  |
| Caco   | GATA4 | 0.001958811 | path:00982_10 |
| Caco   | GATA4 | 0.001238279 | path:00982_4  |
| Caco   | GATA4 | 0.001238279 | path:00982_5  |
| Caco   | GATA4 | 0.001238279 | path:00982_9  |
| Caco   | GATA6 | 0.00185453  | path:00590_1  |
| Caco   | GATA6 | 0.00185453  | path:00590_2  |
| Caco   | GATA6 | 0.00185453  | path:00590_3  |
| Caco   | GATA6 | 0.00185453  | path:00590_4  |
| Caco   | GATA6 | 0.00185453  | path:00591_1  |
| Caco   | GATA6 | 0.008695178 | path:00982_10 |
| Caco   | GATA6 | 0.005342537 | path:00982_4  |
| Caco   | GATA6 | 0.005342537 | path:00982_5  |
| Caco   | GATA6 | 0.005342537 | path:00982_9  |
| Caco   | HNF1A | 0.008512637 | path:00120_5  |

|       |        |             |               |
|-------|--------|-------------|---------------|
| Caco  | HNFI1A | 0.008512637 | path:00140_1  |
| Caco  | HNFI1A | 3.95E-05    | path:00140_12 |
| Caco  | HNFI1A | 0.008512637 | path:00140_22 |
| Caco  | HNFI1A | 0.008512637 | path:00140_23 |
| Caco  | HNFI1A | 0.008512637 | path:00140_24 |
| Caco  | HNFI1A | 0.008512637 | path:00140_25 |
| Caco  | HNFI1A | 0.008512637 | path:00140_26 |
| Caco  | HNFI1A | 0.008512637 | path:00982_6  |
| Caco  | HNFI1A | 0.008512637 | path:04610_6  |
| colon | HNFI4A | 0.00730316  | path:00120_15 |
| colon | HNFI4A | 0.003812707 | path:00120_19 |
| colon | HNFI4A | 0.001698537 | path:00120_6  |
| colon | HNFI4A | 0.003812707 | path:00120_7  |
| colon | HNFI4A | 0.000100826 | path:00120_9  |
| colon | HNFI4A | 0.001808381 | path:00590_1  |
| colon | HNFI4A | 0.001722691 | path:00590_2  |
| colon | HNFI4A | 0.001722691 | path:00590_3  |
| colon | HNFI4A | 0.001898001 | path:00590_4  |
| colon | HNFI4A | 0.000515682 | path:00591_1  |
| colon | HNFI4A | 2.36E-05    | path:00830_2  |
| colon | HNFI4A | 0.000733563 | path:00980_2  |
| colon | HNFI4A | 2.52E-07    | path:00982_10 |
| colon | HNFI4A | 5.38E-08    | path:00982_4  |
| colon | HNFI4A | 5.38E-08    | path:00982_5  |
| colon | HNFI4A | 5.38E-08    | path:00982_9  |
| colon | HNFI4A | 0.001131883 | path:03320_1  |
| colon | HNFI4A | 0.000100826 | path:03320_2  |
| colon | HNFI4A | 4.35E-06    | path:04610_2  |
| colon | HNFI4A | 4.35E-06    | path:04610_3  |
| colon | HNFI4A | 0.000100826 | path:04610_4  |
| colon | HNFI4A | 6.69E-06    | path:04610_5  |
| colon | HNFI4A | 0.000179282 | path:04610_6  |
| colon | HNFI4A | 0.001698537 | path:04610_8  |
| colon | HNFI4A | 0.000287791 | path:04950_4  |



|       |      |             |               |
|-------|------|-------------|---------------|
| colon | TP53 | 0.007702858 | path:04010_15 |
| colon | TP53 | 0.009062653 | path:04010_16 |
| colon | TP53 | 0.007443002 | path:04010_21 |
| colon | TP53 | 0.002466645 | path:04012_12 |
| colon | TP53 | 2.55E-11    | path:04110_1  |
| colon | TP53 | 3.28E-07    | path:04110_17 |
| colon | TP53 | 1.48E-05    | path:04110_19 |
| colon | TP53 | 0.001943417 | path:04110_20 |
| colon | TP53 | 7.56E-05    | path:04110_22 |
| colon | TP53 | 0.000198814 | path:04110_23 |
| colon | TP53 | 0.001943417 | path:04110_27 |
| colon | TP53 | 0.000210553 | path:04110_3  |
| colon | TP53 | 0.004511216 | path:04110_4  |
| colon | TP53 | 4.42E-09    | path:04110_7  |
| colon | TP53 | 0.004291125 | path:04110_8  |
| colon | TP53 | 0           | path:04115_1  |
| colon | TP53 | 0           | path:04115_2  |
| colon | TP53 | 0           | path:04115_3  |
| colon | TP53 | 0           | path:04115_4  |
| colon | TP53 | 0           | path:04115_7  |
| colon | TP53 | 0.000421718 | path:04210_20 |
| colon | TP53 | 0.000275763 | path:04210_23 |
| colon | TP53 | 0.000275763 | path:04210_24 |
| colon | TP53 | 0.009131774 | path:04510_10 |
| colon | TP53 | 0.004511216 | path:04510_15 |
| colon | TP53 | 0.002466645 | path:04510_16 |
| colon | TP53 | 0.000580605 | path:04510_17 |
| colon | TP53 | 0.001774645 | path:04510_18 |
| colon | TP53 | 0.006951959 | path:04510_25 |
| colon | TP53 | 0.006951959 | path:04510_5  |
| colon | TP53 | 0.009576653 | path:04510_6  |
| colon | TP53 | 0.001110697 | path:04510_7  |
| colon | TP53 | 0.00935253  | path:04510_8  |
| colon | TP53 | 0.009062653 | path:04621_7  |

|       |      |             |               |
|-------|------|-------------|---------------|
| colon | TP53 | 0.000218217 | path:04722_19 |
| colon | TP53 | 0.002756828 | path:04912_8  |
| colon | TP53 | 0.009062653 | path:05014_4  |
| colon | TP53 | 0.007459365 | path:05160_12 |
| colon | TP53 | 0.009062653 | path:05160_15 |
| colon | TP53 | 0.000338058 | path:05200_10 |
| colon | TP53 | 0.000275763 | path:05200_11 |
| colon | TP53 | 0.000275763 | path:05200_12 |
| colon | TP53 | 0.000968321 | path:05200_15 |
| colon | TP53 | 0.00392722  | path:05200_17 |
| colon | TP53 | 0.002997803 | path:05200_19 |
| colon | TP53 | 0.00011707  | path:05200_20 |
| colon | TP53 | 0.000275763 | path:05200_4  |
| colon | TP53 | 7.56E-05    | path:05200_47 |
| colon | TP53 | 1.95E-05    | path:05200_48 |
| colon | TP53 | 0.000367024 | path:05200_5  |
| colon | TP53 | 0.000172314 | path:05200_51 |
| colon | TP53 | 1.95E-05    | path:05200_8  |
| colon | TP53 | 0.007459365 | path:05213_2  |
| colon | TP53 | 0.003580594 | path:05214_1  |
| colon | TP53 | 0.000210553 | path:05214_10 |
| colon | TP53 | 0.001774645 | path:05214_11 |
| colon | TP53 | 1.95E-05    | path:05214_12 |
| colon | TP53 | 0.00011707  | path:05214_13 |
| colon | TP53 | 7.56E-05    | path:05214_14 |
| colon | TP53 | 0.003580594 | path:05214_4  |
| colon | TP53 | 0.004511216 | path:05215_10 |
| colon | TP53 | 0.000275763 | path:05215_11 |
| colon | TP53 | 0.00331496  | path:05215_3  |
| colon | TP53 | 0.002754132 | path:05218_2  |
| colon | TP53 | 0.001774645 | path:05218_5  |
| colon | TP53 | 1.95E-05    | path:05218_6  |
| colon | TP53 | 0.001385048 | path:05218_8  |
| colon | TP53 | 0.001691972 | path:05219_3  |

|       |       |             |               |
|-------|-------|-------------|---------------|
| colon | TP53  | 0.009062653 | path:05219_4  |
| colon | TP53  | 0.00011707  | path:05220_12 |
| colon | TP53  | 1.95E-05    | path:05220_8  |
| colon | TP53  | 7.56E-05    | path:05220_9  |
| heart | CREB1 | 0.004288489 | path:04514_1  |
| heart | CREB1 | 0.004288489 | path:04514_3  |
| heart | CREB1 | 0.004288489 | path:04612_3  |
| heart | CREB1 | 0.004131401 | path:04620_12 |
| heart | CREB1 | 0.004131401 | path:04620_16 |
| heart | CREB1 | 0.001277819 | path:04620_17 |
| heart | CREB1 | 0.000627719 | path:04620_18 |
| heart | CREB1 | 0.001277819 | path:04620_22 |
| heart | CREB1 | 0.001277819 | path:04620_9  |
| heart | CREB1 | 0.004131401 | path:04672_4  |
| heart | CREB1 | 0.004131401 | path:04672_5  |
| heart | CREB1 | 0.004131401 | path:04940_1  |
| heart | CREB1 | 0.004288489 | path:05150_14 |
| heart | CREB1 | 0.009649083 | path:05200_18 |
| heart | CREB1 | 0.004131401 | path:05310_1  |
| heart | CREB1 | 0.004131401 | path:05310_3  |
| heart | CREB1 | 0.004131401 | path:05320_1  |
| heart | CREB1 | 0.004131401 | path:05320_3  |
| heart | CREB1 | 0.004131401 | path:05320_4  |
| heart | CREB1 | 0.004131401 | path:05320_6  |
| heart | CREB1 | 0.004131401 | path:05322_5  |
| heart | CREB1 | 0.004131401 | path:05322_6  |
| heart | CREB1 | 0.004131401 | path:05330_1  |
| heart | CREB1 | 0.004131401 | path:05330_2  |
| heart | CREB1 | 0.004131401 | path:05330_4  |
| heart | CREB1 | 0.004131401 | path:05332_1  |
| heart | CREB1 | 0.004131401 | path:05416_4  |
| heart | NR1H3 | 0.000186607 | path:00830_2  |
| heart | NR1H3 | 0.006275482 | path:00980_1  |
| heart | NR1H3 | 0.000535628 | path:00982_4  |

|       |        |             |               |
|-------|--------|-------------|---------------|
| heart | NR1I3  | 0.000535628 | path:00982_5  |
| heart | NR1I3  | 0.000535628 | path:00982_9  |
| heart | SREBF1 | 0.009882974 | path:00100_9  |
| heart | SREBF1 | 0.009882974 | path:03320_2  |
| heart | SREBF1 | 3.27E-05    | path:04910_5  |
| heart | SREBF1 | 0.00143191  | path:04910_6  |
| heart | TP63   | 2.23E-05    | path:04110_1  |
| heart | TP63   | 8.12E-05    | path:04110_7  |
| heart | TP63   | 8.12E-05    | path:04115_1  |
| heart | TP63   | 8.12E-05    | path:04115_2  |
| heart | TP63   | 8.12E-05    | path:04115_3  |
| heart | TP63   | 8.12E-05    | path:04115_4  |
| heart | TP63   | 8.12E-05    | path:04115_7  |
| heart | TP63   | 0.003115907 | path:05200_17 |
| heart | TP63   | 0.002783081 | path:05200_19 |
| heart | TP63   | 0.002783081 | path:05200_20 |
| heart | TP63   | 0.000159403 | path:05200_47 |
| heart | TP63   | 8.12E-05    | path:05200_48 |
| heart | TP63   | 8.12E-05    | path:05214_12 |
| heart | TP63   | 0.000159403 | path:05214_14 |
| heart | TP63   | 0.004120782 | path:05215_11 |
| heart | TP63   | 0.002837304 | path:05215_3  |
| heart | TP63   | 8.12E-05    | path:05218_6  |
| heart | TP63   | 8.12E-05    | path:05220_8  |
| heart | TP63   | 0.000159403 | path:05220_9  |
| HeLa  | NFIC   | 0.004396514 | path:00591_1  |
| HeLa  | NFIC   | 0.005988829 | path:00982_11 |
| HeLa  | NFIC   | 0.00921451  | path:00982_2  |
| HeLa  | NFIC   | 0.005988829 | path:00982_3  |
| HeLa  | NFIC   | 0.00787147  | path:00982_4  |
| HeLa  | NFIC   | 0.00787147  | path:00982_5  |
| HeLa  | NFIC   | 0.004396514 | path:00982_7  |
| HeLa  | NFIC   | 0.004396514 | path:00982_8  |
| HeLa  | NFIC   | 0.00787147  | path:00982_9  |

|      |      |             |               |
|------|------|-------------|---------------|
| HeLa | NFIC | 0.00787147  | path:04010_30 |
| HeLa | NFIC | 0.00787147  | path:04010_31 |
| HeLa | NFIC | 0.004396514 | path:04080_7  |
| HeLa | NFIC | 0.008000492 | path:04115_1  |
| HeLa | NFIC | 0.00787147  | path:04115_2  |
| HeLa | NFIC | 0.00787147  | path:04115_3  |
| HeLa | NFIC | 0.00787147  | path:04115_4  |
| HeLa | NFIC | 0.00787147  | path:04115_7  |
| HeLa | NFIC | 0.00787147  | path:04660_8  |
| HeLa | NFIC | 0.00787147  | path:04662_6  |
| HeLa | NFIC | 0.00787147  | path:04722_19 |
| HeLa | NFIC | 0.00787147  | path:05160_15 |
| HeLa | NFIC | 0.007050709 | path:05200_47 |
| HeLa | NFIC | 0.004396514 | path:05200_48 |
| HeLa | NFIC | 0.00787147  | path:05200_51 |
| HeLa | NFIC | 0.004396514 | path:05214_12 |
| HeLa | NFIC | 0.00787147  | path:05214_13 |
| HeLa | NFIC | 0.007050709 | path:05214_14 |
| HeLa | NFIC | 0.004396514 | path:05218_5  |
| HeLa | NFIC | 0.004396514 | path:05218_6  |
| HeLa | NFIC | 0.00787147  | path:05220_12 |
| HeLa | NFIC | 0.004396514 | path:05220_8  |
| HeLa | NFIC | 0.007050709 | path:05220_9  |
| HeLa | NFYA | 0.00144529  | path:04110_1  |
| HeLa | NFYA | 0.005383343 | path:04110_11 |
| HeLa | NFYA | 0.003794515 | path:04110_12 |
| HeLa | NFYA | 0.000340548 | path:04110_17 |
| HeLa | NFYA | 0.005565492 | path:04110_19 |
| HeLa | NFYA | 0.002132484 | path:04110_22 |
| HeLa | NFYA | 0.000299258 | path:04110_23 |
| HeLa | NFYA | 0.004551637 | path:04110_26 |
| HeLa | NFYA | 0.000299258 | path:04110_3  |
| HeLa | NFYA | 0.004713566 | path:04110_4  |
| HeLa | NFYA | 0.000340548 | path:04110_7  |

|      |       |             |               |
|------|-------|-------------|---------------|
| HeLa | NFYA  | 0.004551637 | path:04110_8  |
| HeLa | NFYA  | 0.001111281 | path:04115_1  |
| HeLa | NFYA  | 0.000123767 | path:04115_2  |
| HeLa | NFYA  | 0.000776011 | path:04115_3  |
| HeLa | NFYA  | 0.000776011 | path:04115_4  |
| HeLa | NFYA  | 0.000776011 | path:04115_7  |
| HeLa | NR2F1 | 0.000132961 | path:03320_2  |
| HeLa | REL   | 0.004162941 | path:04060_8  |
| HeLa | REL   | 0.005200652 | path:04612_7  |
| HeLa | REL   | 0.00019873  | path:04650_22 |
| HeLa | REL   | 0.00019873  | path:04650_23 |
| HeLa | SP1   | 0.006087664 | path:00120_1  |
| HeLa | SP1   | 0.003885876 | path:00120_2  |
| HeLa | SP1   | 0.003885876 | path:00120_3  |
| HeLa | SP1   | 0.001893526 | path:00140_1  |
| HeLa | SP1   | 1.44E-05    | path:00140_10 |
| HeLa | SP1   | 0.001534931 | path:00140_11 |
| HeLa | SP1   | 0.006087664 | path:00140_12 |
| HeLa | SP1   | 2.77E-05    | path:00140_13 |
| HeLa | SP1   | 0.003885876 | path:00140_14 |
| HeLa | SP1   | 0.000245716 | path:00140_16 |
| HeLa | SP1   | 0.000245716 | path:00140_18 |
| HeLa | SP1   | 2.77E-05    | path:00140_19 |
| HeLa | SP1   | 0.000441307 | path:00140_20 |
| HeLa | SP1   | 0.001893526 | path:00140_25 |
| HeLa | SP1   | 1.44E-05    | path:00140_3  |
| HeLa | SP1   | 1.44E-05    | path:00140_4  |
| HeLa | SP1   | 5.07E-05    | path:00140_5  |
| HeLa | SP1   | 8.66E-05    | path:00140_6  |
| HeLa | SP1   | 2.77E-05    | path:00140_7  |
| HeLa | SP1   | 0.000123921 | path:00140_8  |
| HeLa | SP1   | 0.000123921 | path:00140_9  |
| HeLa | SP1   | 0.005536058 | path:00240_16 |
| HeLa | SP1   | 0.003391309 | path:00240_17 |

|      |     |             |               |
|------|-----|-------------|---------------|
| HeLa | SP1 | 0.001690362 | path:00240_2  |
| HeLa | SP1 | 0.009002988 | path:00240_5  |
| HeLa | SP1 | 0.005536058 | path:00330_1  |
| HeLa | SP1 | 0.005126386 | path:00330_9  |
| HeLa | SP1 | 0.006192277 | path:00350_2  |
| HeLa | SP1 | 0.006192277 | path:00350_3  |
| HeLa | SP1 | 0.001393247 | path:00980_2  |
| HeLa | SP1 | 0.002175912 | path:00982_10 |
| HeLa | SP1 | 0.003931316 | path:04010_10 |
| HeLa | SP1 | 0.000441307 | path:04010_26 |
| HeLa | SP1 | 0.000123921 | path:04010_5  |
| HeLa | SP1 | 0.002149604 | path:04060_22 |
| HeLa | SP1 | 0.001014956 | path:04060_32 |
| HeLa | SP1 | 0.007433507 | path:04060_47 |
| HeLa | SP1 | 0.00916136  | path:04110_1  |
| HeLa | SP1 | 1.86E-10    | path:04110_17 |
| HeLa | SP1 | 4.28E-11    | path:04110_18 |
| HeLa | SP1 | 1.05E-10    | path:04110_19 |
| HeLa | SP1 | 2.92E-09    | path:04110_20 |
| HeLa | SP1 | 1.43E-05    | path:04110_22 |
| HeLa | SP1 | 5.22E-09    | path:04110_23 |
| HeLa | SP1 | 0.006192277 | path:04110_25 |
| HeLa | SP1 | 7.70E-08    | path:04110_26 |
| HeLa | SP1 | 2.92E-09    | path:04110_27 |
| HeLa | SP1 | 6.46E-09    | path:04110_3  |
| HeLa | SP1 | 6.46E-09    | path:04110_4  |
| HeLa | SP1 | 4.97E-07    | path:04110_7  |
| HeLa | SP1 | 3.47E-10    | path:04115_1  |
| HeLa | SP1 | 6.74E-05    | path:04115_2  |
| HeLa | SP1 | 4.23E-05    | path:04115_3  |
| HeLa | SP1 | 6.18E-06    | path:04115_4  |
| HeLa | SP1 | 4.96E-05    | path:04115_7  |
| HeLa | SP1 | 7.61E-06    | path:04144_2  |
| HeLa | SP1 | 0.002175912 | path:04210_20 |

|      |     |             |               |
|------|-----|-------------|---------------|
| HeLa | SP1 | 0.001107767 | path:04210_24 |
| HeLa | SP1 | 1.33E-05    | path:04310_6  |
| HeLa | SP1 | 1.77E-05    | path:04310_7  |
| HeLa | SP1 | 7.85E-13    | path:04510_1  |
| HeLa | SP1 | 1.05E-10    | path:04510_10 |
| HeLa | SP1 | 0.001603207 | path:04510_13 |
| HeLa | SP1 | 0.001164758 | path:04510_15 |
| HeLa | SP1 | 0.002771235 | path:04510_16 |
| HeLa | SP1 | 0.000141426 | path:04510_17 |
| HeLa | SP1 | 8.07E-08    | path:04510_18 |
| HeLa | SP1 | 1.96E-12    | path:04510_19 |
| HeLa | SP1 | 1.43E-05    | path:04510_20 |
| HeLa | SP1 | 0.000718519 | path:04510_23 |
| HeLa | SP1 | 0.002175912 | path:04510_24 |
| HeLa | SP1 | 0.0024986   | path:04510_25 |
| HeLa | SP1 | 6.74E-05    | path:04510_4  |
| HeLa | SP1 | 0.0024986   | path:04510_5  |
| HeLa | SP1 | 1.07E-10    | path:04510_6  |
| HeLa | SP1 | 0.000448433 | path:04510_7  |
| HeLa | SP1 | 6.16E-10    | path:04510_8  |
| HeLa | SP1 | 2.01E-05    | path:04512_10 |
| HeLa | SP1 | 5.55E-06    | path:04512_11 |
| HeLa | SP1 | 1.66E-06    | path:04512_12 |
| HeLa | SP1 | 7.86E-06    | path:04512_13 |
| HeLa | SP1 | 0.000101569 | path:04512_14 |
| HeLa | SP1 | 0.000245716 | path:04512_18 |
| HeLa | SP1 | 0.000549822 | path:04512_19 |
| HeLa | SP1 | 0.002149604 | path:04512_20 |
| HeLa | SP1 | 0.008608739 | path:04512_22 |
| HeLa | SP1 | 0.00016592  | path:04512_27 |
| HeLa | SP1 | 1.66E-05    | path:04512_3  |
| HeLa | SP1 | 2.72E-07    | path:04512_5  |
| HeLa | SP1 | 6.24E-07    | path:04512_6  |
| HeLa | SP1 | 9.36E-06    | path:04512_9  |



|      |     |             |               |
|------|-----|-------------|---------------|
| HeLa | SP1 | 0.005126386 | path:04520_3  |
| HeLa | SP1 | 0.001603207 | path:04520_5  |
| HeLa | SP1 | 0.000412181 | path:04520_7  |
| HeLa | SP1 | 1.22E-05    | path:04540_13 |
| HeLa | SP1 | 9.21E-07    | path:04610_3  |
| HeLa | SP1 | 5.55E-06    | path:04610_4  |
| HeLa | SP1 | 9.21E-07    | path:04610_6  |
| HeLa | SP1 | 0.000133832 | path:04610_7  |
| HeLa | SP1 | 0.000203885 | path:04610_8  |
| HeLa | SP1 | 0.000203885 | path:04620_18 |
| HeLa | SP1 | 0.001893526 | path:04620_9  |
| HeLa | SP1 | 0.000231547 | path:04630_1  |
| HeLa | SP1 | 0.001390056 | path:04630_2  |
| HeLa | SP1 | 1.97E-06    | path:04630_3  |
| HeLa | SP1 | 5.95E-06    | path:04630_4  |
| HeLa | SP1 | 4.84E-05    | path:04650_20 |
| HeLa | SP1 | 0.008608739 | path:04650_7  |
| HeLa | SP1 | 0.000718519 | path:04722_19 |
| HeLa | SP1 | 7.92E-07    | path:04810_29 |
| HeLa | SP1 | 1.33E-05    | path:04912_8  |
| HeLa | SP1 | 0.007433507 | path:04940_4  |
| HeLa | SP1 | 0.006087664 | path:05014_3  |
| HeLa | SP1 | 0.008608739 | path:05014_4  |
| HeLa | SP1 | 0.007433507 | path:05016_8  |
| HeLa | SP1 | 0.001014956 | path:05100_3  |
| HeLa | SP1 | 0.008608739 | path:05140_10 |
| HeLa | SP1 | 0.000245716 | path:05140_6  |
| HeLa | SP1 | 0.001107767 | path:05142_10 |
| HeLa | SP1 | 0.003931316 | path:05142_11 |
| HeLa | SP1 | 0.003885876 | path:05142_17 |
| HeLa | SP1 | 0.003885876 | path:05142_18 |
| HeLa | SP1 | 0.000441307 | path:05142_20 |
| HeLa | SP1 | 0.000718519 | path:05142_21 |
| HeLa | SP1 | 0.001107767 | path:05142_4  |

|      |     |             |               |
|------|-----|-------------|---------------|
| HeLa | SP1 | 0.006087664 | path:05145_19 |
| HeLa | SP1 | 0.001014956 | path:05145_21 |
| HeLa | SP1 | 0.006087664 | path:05145_8  |
| HeLa | SP1 | 1.23E-06    | path:05146_1  |
| HeLa | SP1 | 7.92E-07    | path:05146_2  |
| HeLa | SP1 | 0.002149604 | path:05146_5  |
| HeLa | SP1 | 9.10E-07    | path:05146_9  |
| HeLa | SP1 | 0.003935354 | path:05200_19 |
| HeLa | SP1 | 0.003935354 | path:05200_20 |
| HeLa | SP1 | 0.00927462  | path:05200_24 |
| HeLa | SP1 | 9.21E-07    | path:05200_29 |
| HeLa | SP1 | 2.01E-05    | path:05200_3  |
| HeLa | SP1 | 0.000718519 | path:05200_31 |
| HeLa | SP1 | 0.008608739 | path:05200_38 |
| HeLa | SP1 | 0.000289957 | path:05200_4  |
| HeLa | SP1 | 0.000718519 | path:05200_42 |
| HeLa | SP1 | 2.07E-08    | path:05200_47 |
| HeLa | SP1 | 1.33E-05    | path:05200_48 |
| HeLa | SP1 | 5.07E-05    | path:05200_50 |
| HeLa | SP1 | 5.54E-09    | path:05200_51 |
| HeLa | SP1 | 1.55E-08    | path:05200_52 |
| HeLa | SP1 | 4.11E-06    | path:05200_53 |
| HeLa | SP1 | 0.001014956 | path:05200_56 |
| HeLa | SP1 | 0.000441307 | path:05210_10 |
| HeLa | SP1 | 0.000718519 | path:05210_12 |
| HeLa | SP1 | 0.000718519 | path:05210_7  |
| HeLa | SP1 | 1.44E-05    | path:05212_13 |
| HeLa | SP1 | 0.008608739 | path:05212_14 |
| HeLa | SP1 | 1.33E-05    | path:05214_12 |
| HeLa | SP1 | 1.18E-07    | path:05214_13 |
| HeLa | SP1 | 2.07E-08    | path:05214_14 |
| HeLa | SP1 | 9.21E-07    | path:05214_15 |
| HeLa | SP1 | 0.005536058 | path:05214_2  |
| HeLa | SP1 | 0.000245716 | path:05214_21 |

|      |        |             |               |
|------|--------|-------------|---------------|
| HeLa | SP1    | 0.005536058 | path:05214_5  |
| HeLa | SP1    | 0.001164758 | path:05215_10 |
| HeLa | SP1    | 0.008608739 | path:05215_7  |
| HeLa | SP1    | 0.000441307 | path:05216_4  |
| HeLa | SP1    | 0.000411461 | path:05218_4  |
| HeLa | SP1    | 0.000133832 | path:05218_5  |
| HeLa | SP1    | 1.33E-05    | path:05218_6  |
| HeLa | SP1    | 9.21E-07    | path:05218_7  |
| HeLa | SP1    | 7.27E-05    | path:05218_8  |
| HeLa | SP1    | 0.000310459 | path:05219_3  |
| HeLa | SP1    | 1.44E-05    | path:05219_4  |
| HeLa | SP1    | 9.21E-07    | path:05220_11 |
| HeLa | SP1    | 1.18E-07    | path:05220_12 |
| HeLa | SP1    | 0.002149604 | path:05220_5  |
| HeLa | SP1    | 1.33E-05    | path:05220_8  |
| HeLa | SP1    | 2.07E-08    | path:05220_9  |
| HeLa | SP1    | 0.006192277 | path:05221_1  |
| HeLa | SP1    | 5.36E-07    | path:05222_1  |
| HeLa | SP1    | 0.000133832 | path:05222_2  |
| HeLa | SP1    | 2.01E-05    | path:05222_4  |
| HeLa | SP1    | 0.001603207 | path:05222_7  |
| HeLa | SP1    | 1.44E-05    | path:05223_3  |
| HeLa | SP1    | 0.007433507 | path:05320_9  |
| HeLa | SP1    | 0.007433507 | path:05330_5  |
| HeLa | SP1    | 0.007433507 | path:05332_2  |
| HeLa | SP1    | 0.007433507 | path:05332_5  |
| HeLa | SP1    | 1.77E-05    | path:05414_2  |
| HeLa | SRF    | 0.004545882 | path:05020_8  |
| HeLa | SRF    | 0.00379009  | path:05020_9  |
| HeLa | SRF    | 0.003033557 | path:05410_2  |
| HeLa | SRF    | 0.003033557 | path:05414_3  |
| HeLa | SRF    | 0.003033557 | path:05416_1  |
| HeLa | TFAP2A | 0.005723968 | path:04020_2  |
| HeLa | TFAP2A | 0.003857334 | path:04080_7  |

|      |        |             |               |
|------|--------|-------------|---------------|
| HeLa | TFAP2A | 0.00057548  | path:04144_2  |
| HeLa | TFAP2A | 0.001269093 | path:04510_10 |
| HeLa | TFAP2A | 0.005458314 | path:04510_15 |
| HeLa | TFAP2A | 0.003332624 | path:04510_16 |
| HeLa | TFAP2A | 3.81E-05    | path:04510_17 |
| HeLa | TFAP2A | 1.42E-05    | path:04510_18 |
| HeLa | TFAP2A | 0.007739985 | path:04510_25 |
| HeLa | TFAP2A | 0.007739985 | path:04510_5  |
| HeLa | TFAP2A | 0.001276164 | path:04510_6  |
| HeLa | TFAP2A | 8.35E-05    | path:04510_7  |
| HeLa | TFAP2A | 0.001271633 | path:04510_8  |
| HeLa | TFAP2A | 0.002407854 | path:04520_2  |
| HeLa | TFAP2A | 0.001262516 | path:04520_3  |
| HeLa | TFAP2A | 0.00057548  | path:04520_5  |
| HeLa | TFAP2A | 0.001262516 | path:04520_7  |
| HeLa | TFAP2A | 0.009046641 | path:04520_9  |
| HeLa | TFAP2A | 0.003857334 | path:04912_8  |
| HeLa | TFAP2A | 2.20E-05    | path:05200_10 |
| HeLa | TFAP2A | 1.91E-05    | path:05200_11 |
| HeLa | TFAP2A | 1.91E-05    | path:05200_12 |
| HeLa | TFAP2A | 6.62E-06    | path:05200_15 |
| HeLa | TFAP2A | 0.000448647 | path:05200_21 |
| HeLa | TFAP2A | 8.35E-05    | path:05200_29 |
| HeLa | TFAP2A | 1.91E-05    | path:05200_4  |
| HeLa | TFAP2A | 2.22E-05    | path:05200_5  |
| HeLa | TFAP2A | 2.16E-06    | path:05200_8  |
| HeLa | TFAP2A | 0.002699451 | path:05212_11 |
| HeLa | TFAP2A | 0.003332624 | path:05212_12 |
| HeLa | TFAP2A | 0.004058678 | path:05214_1  |
| HeLa | TFAP2A | 0.000317116 | path:05214_10 |
| HeLa | TFAP2A | 0.002407854 | path:05214_11 |
| HeLa | TFAP2A | 0.007739985 | path:05214_16 |
| HeLa | TFAP2A | 0.004058678 | path:05214_17 |
| HeLa | TFAP2A | 0.004058678 | path:05214_2  |

|      |        |             |               |
|------|--------|-------------|---------------|
| HeLa | TFAP2A | 0.004058678 | path:05214_3  |
| HeLa | TFAP2A | 0.004058678 | path:05214_4  |
| HeLa | TFAP2A | 0.004058678 | path:05214_5  |
| HeLa | TFAP2A | 0.004058678 | path:05214_6  |
| HeLa | TFAP2A | 0.007739985 | path:05214_7  |
| HeLa | TFAP2A | 0.004058678 | path:05214_8  |
| HeLa | TFAP2A | 0.000317116 | path:05215_10 |
| HeLa | TFAP2A | 0.000436788 | path:05215_11 |
| HeLa | TFAP2A | 0.001124594 | path:05215_8  |
| HeLa | TFAP2A | 0.002407854 | path:05219_2  |
| HeLa | VDR    | 0.009786942 | path:00140_1  |
| HeLa | VDR    | 0.008771608 | path:00140_11 |
| HeLa | VDR    | 0.009786942 | path:00140_25 |
| HeLa | VDR    | 0.009786942 | path:00140_26 |
| HeLa | VDR    | 0.008771608 | path:00591_1  |
| HeLa | VDR    | 0.00973729  | path:00980_2  |
| HeLa | VDR    | 0.004788204 | path:00982_10 |
| HeLa | VDR    | 0.001635842 | path:00982_11 |
| HeLa | VDR    | 0.003675018 | path:00982_2  |
| HeLa | VDR    | 0.001635842 | path:00982_3  |
| HeLa | VDR    | 0.003361044 | path:00982_4  |
| HeLa | VDR    | 0.003361044 | path:00982_5  |
| HeLa | VDR    | 0.008771608 | path:00982_6  |
| HeLa | VDR    | 0.001635842 | path:00982_7  |
| HeLa | VDR    | 0.001635842 | path:00982_8  |
| HeLa | VDR    | 0.003361044 | path:00982_9  |
| HeLa | VDR    | 0.008771608 | path:04012_1  |
| HeLa | VDR    | 0.008771608 | path:04012_11 |
| HeLa | VDR    | 0.008771608 | path:04012_12 |
| HeLa | VDR    | 0.0090937   | path:04012_14 |
| HeLa | VDR    | 0.008771608 | path:04012_4  |
| HeLa | VDR    | 0.008771608 | path:04012_7  |
| HeLa | VDR    | 0.008771608 | path:05200_9  |
| HeLa | VDR    | 0.008771608 | path:05214_1  |

|               |       |             |               |
|---------------|-------|-------------|---------------|
| HeLa          | VDR   | 0.009415594 | path:05214_10 |
| HeLa          | VDR   | 0.008771608 | path:05214_17 |
| HeLa          | VDR   | 0.008771608 | path:05214_2  |
| HeLa          | VDR   | 0.008771608 | path:05214_3  |
| HeLa          | VDR   | 0.008771608 | path:05214_4  |
| HeLa          | VDR   | 0.008771608 | path:05214_5  |
| HeLa          | VDR   | 0.008771608 | path:05214_6  |
| HeLa          | VDR   | 0.008771608 | path:05214_8  |
| HeLa          | VDR   | 0.009786942 | path:05215_11 |
| HeLa          | VDR   | 0.008771608 | path:05218_2  |
| HeLa          | VDR   | 0.008771608 | path:05223_6  |
| hematopoietic | FOXA3 | 0.000327469 | path:00140_1  |
| hematopoietic | FOXA3 | 0.000188543 | path:00140_11 |
| hematopoietic | FOXA3 | 0.000502586 | path:00140_12 |
| hematopoietic | FOXA3 | 0.000327469 | path:00140_25 |
| hematopoietic | FOXA3 | 0.000327469 | path:00140_26 |
| hematopoietic | FOXA3 | 0.000312584 | path:00591_1  |
| hematopoietic | FOXA3 | 0.000975791 | path:00830_2  |
| hematopoietic | FOXA3 | 0.000327469 | path:00980_2  |
| hematopoietic | FOXA3 | 7.28E-05    | path:00982_10 |
| hematopoietic | FOXA3 | 2.48E-05    | path:00982_11 |
| hematopoietic | FOXA3 | 5.58E-05    | path:00982_2  |
| hematopoietic | FOXA3 | 2.48E-05    | path:00982_3  |
| hematopoietic | FOXA3 | 5.10E-05    | path:00982_4  |
| hematopoietic | FOXA3 | 5.10E-05    | path:00982_5  |
| hematopoietic | FOXA3 | 0.000248984 | path:00982_6  |
| hematopoietic | FOXA3 | 2.48E-05    | path:00982_7  |
| hematopoietic | FOXA3 | 2.48E-05    | path:00982_8  |
| hematopoietic | FOXA3 | 5.10E-05    | path:00982_9  |
| hematopoietic | STAT6 | 0.003994719 | path:00590_4  |
| hematopoietic | STAT6 | 0.000657478 | path:04630_2  |
| hematopoietic | STAT6 | 0.000657478 | path:04630_3  |
| hematopoietic | STAT6 | 0.000657478 | path:04630_4  |
| Hep3B         | EGR1  | 0.009869535 | path:04060_8  |

|       |       |             |               |
|-------|-------|-------------|---------------|
| Hep3B | EGR1  | 0.00069989  | path:04510_10 |
| Hep3B | EGR1  | 0.00069989  | path:04510_18 |
| Hep3B | EGR1  | 0.003153788 | path:04510_6  |
| Hep3B | EGR1  | 0.003153788 | path:04510_8  |
| Hep3B | EGR1  | 0.00129686  | path:04512_3  |
| Hep3B | EGR1  | 0.003153788 | path:04540_13 |
| Hep3B | EGR1  | 0.003153788 | path:05146_9  |
| Hep3B | EGR1  | 0.007008495 | path:05212_11 |
| Hep3B | EGR1  | 0.008365691 | path:05212_12 |
| Hep3B | EGR1  | 0.003153788 | path:05218_4  |
| Hep3B | GATA2 | 0.002976989 | path:04060_47 |
| Hep3B | HN4A  | 0.00730316  | path:00120_15 |
| Hep3B | HN4A  | 0.003812707 | path:00120_19 |
| Hep3B | HN4A  | 0.001698537 | path:00120_6  |
| Hep3B | HN4A  | 0.003812707 | path:00120_7  |
| Hep3B | HN4A  | 0.000100826 | path:00120_9  |
| Hep3B | HN4A  | 0.001808381 | path:00590_1  |
| Hep3B | HN4A  | 0.001722691 | path:00590_2  |
| Hep3B | HN4A  | 0.001722691 | path:00590_3  |
| Hep3B | HN4A  | 0.001898001 | path:00590_4  |
| Hep3B | HN4A  | 0.000515682 | path:00591_1  |
| Hep3B | HN4A  | 2.36E-05    | path:00830_2  |
| Hep3B | HN4A  | 0.000733563 | path:00980_2  |
| Hep3B | HN4A  | 2.52E-07    | path:00982_10 |
| Hep3B | HN4A  | 5.38E-08    | path:00982_4  |
| Hep3B | HN4A  | 5.38E-08    | path:00982_5  |
| Hep3B | HN4A  | 5.38E-08    | path:00982_9  |
| Hep3B | HN4A  | 0.001131883 | path:03320_1  |
| Hep3B | HN4A  | 0.000100826 | path:03320_2  |
| Hep3B | HN4A  | 4.35E-06    | path:04610_2  |
| Hep3B | HN4A  | 4.35E-06    | path:04610_3  |
| Hep3B | HN4A  | 0.000100826 | path:04610_4  |
| Hep3B | HN4A  | 6.69E-06    | path:04610_5  |
| Hep3B | HN4A  | 0.000179282 | path:04610_6  |

|       |        |             |               |
|-------|--------|-------------|---------------|
| Hep3B | HNH4A  | 0.001698537 | path:04610_8  |
| Hep3B | HNH4A  | 0.000287791 | path:04950_4  |
| HepG2 | GATA2  | 0.002976989 | path:04060_47 |
| HepG2 | GATA3  | 0.003994597 | path:04612_4  |
| HepG2 | NFE2L2 | 0.003129559 | path:00480_1  |
| HepG2 | NFE2L2 | 2.02E-06    | path:00480_2  |
| HepG2 | NFE2L2 | 0.003129559 | path:00480_3  |
| HepG2 | NFE2L2 | 0.003129559 | path:00480_4  |
| HepG2 | NFE2L2 | 0.003129559 | path:00480_5  |
| HepG2 | NFE2L2 | 0.003129559 | path:00480_6  |
| HepG2 | STAT5B | 0.009500448 | path:04110_20 |
| HepG2 | STAT5B | 0.009500448 | path:04110_27 |
| HepG2 | STAT5B | 0.000370487 | path:04630_4  |
| HepG2 | STAT5B | 0.009500448 | path:05200_29 |
| HepG2 | STAT5B | 0.002527186 | path:05200_47 |
| HepG2 | STAT5B | 0.002527186 | path:05200_51 |
| HepG2 | STAT5B | 0.005012521 | path:05200_52 |
| HepG2 | STAT5B | 0.002527186 | path:05214_13 |
| HepG2 | STAT5B | 0.002527186 | path:05214_14 |
| HepG2 | STAT5B | 0.002527186 | path:05214_15 |
| HepG2 | STAT5B | 0.009500448 | path:05218_5  |
| HepG2 | STAT5B | 0.002527186 | path:05218_7  |
| HepG2 | STAT5B | 0.009060668 | path:05218_8  |
| HepG2 | STAT5B | 0.002527186 | path:05219_4  |
| HepG2 | STAT5B | 0.002527186 | path:05220_11 |
| HepG2 | STAT5B | 0.002527186 | path:05220_12 |
| HepG2 | STAT5B | 0.002527186 | path:05220_9  |
| HL60  | KLF4   | 4.70E-05    | path:04110_17 |
| HL60  | KLF4   | 4.70E-05    | path:04110_19 |
| HL60  | KLF4   | 0.000691257 | path:04110_20 |
| HL60  | KLF4   | 0.001048885 | path:04110_23 |
| HL60  | KLF4   | 0.001048885 | path:04110_26 |
| HL60  | KLF4   | 0.000691257 | path:04110_27 |
| HL60  | KLF4   | 0.001048885 | path:04110_3  |



|      |      |             |               |
|------|------|-------------|---------------|
| HL60 | KLF4 | 0.001048885 | path:04110_4  |
| HL60 | KLF4 | 0.001498093 | path:04110_7  |
| HL60 | KLF4 | 0.003364391 | path:04115_1  |
| HL60 | KLF4 | 0.007702669 | path:04512_1  |
| HL60 | KLF4 | 0.007702669 | path:04512_2  |
| HL60 | KLF4 | 0.007140402 | path:04512_4  |
| HL60 | KLF4 | 0.007140402 | path:04512_7  |
| HL60 | KLF4 | 0.007140402 | path:04512_8  |
| HL60 | KLF4 | 0.007140402 | path:05145_14 |
| HL60 | KLF4 | 0.003572583 | path:05200_31 |
| HL60 | KLF4 | 0.002858346 | path:05200_47 |
| HL60 | KLF4 | 0.003572583 | path:05200_51 |
| HL60 | KLF4 | 0.007103944 | path:05200_52 |
| HL60 | KLF4 | 0.005224296 | path:05200_53 |
| HL60 | KLF4 | 0.003572583 | path:05210_12 |
| HL60 | KLF4 | 0.003572583 | path:05210_7  |
| HL60 | KLF4 | 0.003364391 | path:05214_13 |
| HL60 | KLF4 | 0.002858346 | path:05214_14 |
| HL60 | KLF4 | 0.003572583 | path:05214_15 |
| HL60 | KLF4 | 0.003572583 | path:05218_7  |
| HL60 | KLF4 | 0.003572583 | path:05219_4  |
| HL60 | KLF4 | 0.003572583 | path:05220_11 |
| HL60 | KLF4 | 0.003364391 | path:05220_12 |
| HL60 | KLF4 | 0.002858346 | path:05220_9  |
| HL60 | TP73 | 6.75E-05    | path:04115_1  |
| HL60 | TP73 | 6.67E-05    | path:04115_2  |
| HL60 | TP73 | 6.67E-05    | path:04115_3  |
| HL60 | TP73 | 6.67E-05    | path:04115_4  |
| HL60 | TP73 | 6.67E-05    | path:04115_7  |
| HL60 | TP73 | 0.000595015 | path:04722_19 |
| HL60 | VDR  | 0.009786942 | path:00140_1  |
| HL60 | VDR  | 0.008771608 | path:00140_11 |
| HL60 | VDR  | 0.009786942 | path:00140_25 |
| HL60 | VDR  | 0.009786942 | path:00140_26 |

|       |      |             |               |
|-------|------|-------------|---------------|
| HL60  | VDR  | 0.008771608 | path:00591_1  |
| HL60  | VDR  | 0.00973729  | path:00980_2  |
| HL60  | VDR  | 0.004788204 | path:00982_10 |
| HL60  | VDR  | 0.001635842 | path:00982_11 |
| HL60  | VDR  | 0.003675018 | path:00982_2  |
| HL60  | VDR  | 0.001635842 | path:00982_3  |
| HL60  | VDR  | 0.003361044 | path:00982_4  |
| HL60  | VDR  | 0.003361044 | path:00982_5  |
| HL60  | VDR  | 0.008771608 | path:00982_6  |
| HL60  | VDR  | 0.001635842 | path:00982_7  |
| HL60  | VDR  | 0.001635842 | path:00982_8  |
| HL60  | VDR  | 0.003361044 | path:00982_9  |
| HL60  | VDR  | 0.008771608 | path:04012_1  |
| HL60  | VDR  | 0.008771608 | path:04012_11 |
| HL60  | VDR  | 0.008771608 | path:04012_12 |
| HL60  | VDR  | 0.0090937   | path:04012_14 |
| HL60  | VDR  | 0.008771608 | path:04012_4  |
| HL60  | VDR  | 0.008771608 | path:04012_7  |
| HL60  | VDR  | 0.008771608 | path:05200_9  |
| HL60  | VDR  | 0.008771608 | path:05214_1  |
| HL60  | VDR  | 0.009415594 | path:05214_10 |
| HL60  | VDR  | 0.008771608 | path:05214_17 |
| HL60  | VDR  | 0.008771608 | path:05214_2  |
| HL60  | VDR  | 0.008771608 | path:05214_3  |
| HL60  | VDR  | 0.008771608 | path:05214_4  |
| HL60  | VDR  | 0.008771608 | path:05214_5  |
| HL60  | VDR  | 0.008771608 | path:05214_6  |
| HL60  | VDR  | 0.008771608 | path:05214_8  |
| HL60  | VDR  | 0.009786942 | path:05215_11 |
| HL60  | VDR  | 0.008771608 | path:05218_2  |
| HL60  | VDR  | 0.008771608 | path:05223_6  |
| HUVEC | EGR1 | 0.009869535 | path:04060_8  |
| HUVEC | EGR1 | 0.00069989  | path:04510_10 |
| HUVEC | EGR1 | 0.00069989  | path:04510_18 |

|       |      |             |               |
|-------|------|-------------|---------------|
| HUVEC | EGR1 | 0.003153788 | path:04510_6  |
| HUVEC | EGR1 | 0.003153788 | path:04510_8  |
| HUVEC | EGR1 | 0.00129686  | path:04512_3  |
| HUVEC | EGR1 | 0.003153788 | path:04540_13 |
| HUVEC | EGR1 | 0.003153788 | path:05146_9  |
| HUVEC | EGR1 | 0.007008495 | path:05212_11 |
| HUVEC | EGR1 | 0.008365691 | path:05212_12 |
| HUVEC | EGR1 | 0.003153788 | path:05218_4  |
| HUVEC | REL  | 0.004162941 | path:04060_8  |
| HUVEC | REL  | 0.005200652 | path:04612_7  |
| HUVEC | REL  | 0.00019873  | path:04650_22 |
| HUVEC | REL  | 0.00019873  | path:04650_23 |
| HUVEC | RELA | 0.000137451 | path:04060_62 |
| HUVEC | RELA | 2.04E-07    | path:04062_1  |
| HUVEC | RELA | 3.87E-08    | path:04062_2  |
| HUVEC | RELA | 0.001869278 | path:04110_17 |
| HUVEC | RELA | 0.001781655 | path:04110_19 |
| HUVEC | RELA | 0.001869278 | path:04110_7  |
| HUVEC | RELA | 0.0005539   | path:04115_1  |
| HUVEC | RELA | 2.11E-06    | path:04620_1  |
| HUVEC | RELA | 4.80E-09    | path:04620_12 |
| HUVEC | RELA | 1.51E-07    | path:04620_13 |
| HUVEC | RELA | 2.07E-07    | path:04620_14 |
| HUVEC | RELA | 1.03E-08    | path:04620_16 |
| HUVEC | RELA | 6.51E-08    | path:04620_17 |
| HUVEC | RELA | 8.85E-09    | path:04620_18 |
| HUVEC | RELA | 6.51E-08    | path:04620_22 |
| HUVEC | RELA | 7.78E-08    | path:04620_9  |
| HUVEC | RELA | 0.00197363  | path:04650_22 |
| HUVEC | RELA | 0.001781655 | path:04650_23 |
| HUVEC | SP1  | 0.006087664 | path:00120_1  |
| HUVEC | SP1  | 0.003885876 | path:00120_2  |
| HUVEC | SP1  | 0.003885876 | path:00120_3  |
| HUVEC | SP1  | 0.001893526 | path:00140_1  |

|       |     |             |               |
|-------|-----|-------------|---------------|
| HUVEC | SP1 | 1.44E-05    | path:00140_10 |
| HUVEC | SP1 | 0.001534931 | path:00140_11 |
| HUVEC | SP1 | 0.006087664 | path:00140_12 |
| HUVEC | SP1 | 2.77E-05    | path:00140_13 |
| HUVEC | SP1 | 0.003885876 | path:00140_14 |
| HUVEC | SP1 | 0.000245716 | path:00140_16 |
| HUVEC | SP1 | 0.000245716 | path:00140_18 |
| HUVEC | SP1 | 2.77E-05    | path:00140_19 |
| HUVEC | SP1 | 0.000441307 | path:00140_20 |
| HUVEC | SP1 | 0.001893526 | path:00140_25 |
| HUVEC | SP1 | 1.44E-05    | path:00140_3  |
| HUVEC | SP1 | 1.44E-05    | path:00140_4  |
| HUVEC | SP1 | 5.07E-05    | path:00140_5  |
| HUVEC | SP1 | 8.66E-05    | path:00140_6  |
| HUVEC | SP1 | 2.77E-05    | path:00140_7  |
| HUVEC | SP1 | 0.000123921 | path:00140_8  |
| HUVEC | SP1 | 0.000123921 | path:00140_9  |
| HUVEC | SP1 | 0.005536058 | path:00240_16 |
| HUVEC | SP1 | 0.003391309 | path:00240_17 |
| HUVEC | SP1 | 0.001690362 | path:00240_2  |
| HUVEC | SP1 | 0.009002988 | path:00240_5  |
| HUVEC | SP1 | 0.005536058 | path:00330_1  |
| HUVEC | SP1 | 0.005126386 | path:00330_9  |
| HUVEC | SP1 | 0.006192277 | path:00350_2  |
| HUVEC | SP1 | 0.006192277 | path:00350_3  |
| HUVEC | SP1 | 0.001393247 | path:00980_2  |
| HUVEC | SP1 | 0.002175912 | path:00982_10 |
| HUVEC | SP1 | 0.003931316 | path:04010_10 |
| HUVEC | SP1 | 0.000441307 | path:04010_26 |
| HUVEC | SP1 | 0.000123921 | path:04010_5  |
| HUVEC | SP1 | 0.002149604 | path:04060_22 |
| HUVEC | SP1 | 0.001014956 | path:04060_32 |
| HUVEC | SP1 | 0.007433507 | path:04060_47 |
| HUVEC | SP1 | 0.00916136  | path:04110_1  |

|       |     |             |               |
|-------|-----|-------------|---------------|
| HUVEC | SP1 | 1.86E-10    | path:04110_17 |
| HUVEC | SP1 | 4.28E-11    | path:04110_18 |
| HUVEC | SP1 | 1.05E-10    | path:04110_19 |
| HUVEC | SP1 | 2.92E-09    | path:04110_20 |
| HUVEC | SP1 | 1.43E-05    | path:04110_22 |
| HUVEC | SP1 | 5.22E-09    | path:04110_23 |
| HUVEC | SP1 | 0.006192277 | path:04110_25 |
| HUVEC | SP1 | 7.70E-08    | path:04110_26 |
| HUVEC | SP1 | 2.92E-09    | path:04110_27 |
| HUVEC | SP1 | 6.46E-09    | path:04110_3  |
| HUVEC | SP1 | 6.46E-09    | path:04110_4  |
| HUVEC | SP1 | 4.97E-07    | path:04110_7  |
| HUVEC | SP1 | 3.47E-10    | path:04115_1  |
| HUVEC | SP1 | 6.74E-05    | path:04115_2  |
| HUVEC | SP1 | 4.23E-05    | path:04115_3  |
| HUVEC | SP1 | 6.18E-06    | path:04115_4  |
| HUVEC | SP1 | 4.96E-05    | path:04115_7  |
| HUVEC | SP1 | 7.61E-06    | path:04144_2  |
| HUVEC | SP1 | 0.002175912 | path:04210_20 |
| HUVEC | SP1 | 0.001107767 | path:04210_24 |
| HUVEC | SP1 | 1.33E-05    | path:04310_6  |
| HUVEC | SP1 | 1.77E-05    | path:04310_7  |
| HUVEC | SP1 | 7.85E-13    | path:04510_1  |
| HUVEC | SP1 | 1.05E-10    | path:04510_10 |
| HUVEC | SP1 | 0.001603207 | path:04510_13 |
| HUVEC | SP1 | 0.001164758 | path:04510_15 |
| HUVEC | SP1 | 0.002771235 | path:04510_16 |
| HUVEC | SP1 | 0.000141426 | path:04510_17 |
| HUVEC | SP1 | 8.07E-08    | path:04510_18 |
| HUVEC | SP1 | 1.96E-12    | path:04510_19 |
| HUVEC | SP1 | 1.43E-05    | path:04510_20 |
| HUVEC | SP1 | 0.000718519 | path:04510_23 |
| HUVEC | SP1 | 0.002175912 | path:04510_24 |
| HUVEC | SP1 | 0.0024986   | path:04510_25 |

|       |     |             |               |
|-------|-----|-------------|---------------|
| HUVEC | SP1 | 6.74E-05    | path:04510_4  |
| HUVEC | SP1 | 0.0024986   | path:04510_5  |
| HUVEC | SP1 | 1.07E-10    | path:04510_6  |
| HUVEC | SP1 | 0.000448433 | path:04510_7  |
| HUVEC | SP1 | 6.16E-10    | path:04510_8  |
| HUVEC | SP1 | 2.01E-05    | path:04512_10 |
| HUVEC | SP1 | 5.55E-06    | path:04512_11 |
| HUVEC | SP1 | 1.66E-06    | path:04512_12 |
| HUVEC | SP1 | 7.86E-06    | path:04512_13 |
| HUVEC | SP1 | 0.000101569 | path:04512_14 |
| HUVEC | SP1 | 0.000245716 | path:04512_18 |
| HUVEC | SP1 | 0.000549822 | path:04512_19 |
| HUVEC | SP1 | 0.002149604 | path:04512_20 |
| HUVEC | SP1 | 0.008608739 | path:04512_22 |
| HUVEC | SP1 | 0.00016592  | path:04512_27 |
| HUVEC | SP1 | 1.66E-05    | path:04512_3  |
| HUVEC | SP1 | 2.72E-07    | path:04512_5  |
| HUVEC | SP1 | 6.24E-07    | path:04512_6  |
| HUVEC | SP1 | 9.36E-06    | path:04512_9  |
| HUVEC | SP1 | 0.005126386 | path:04520_3  |
| HUVEC | SP1 | 0.001603207 | path:04520_5  |
| HUVEC | SP1 | 0.000412181 | path:04520_7  |
| HUVEC | SP1 | 1.22E-05    | path:04540_13 |
| HUVEC | SP1 | 9.21E-07    | path:04610_3  |
| HUVEC | SP1 | 5.55E-06    | path:04610_4  |
| HUVEC | SP1 | 9.21E-07    | path:04610_6  |
| HUVEC | SP1 | 0.000133832 | path:04610_7  |
| HUVEC | SP1 | 0.000203885 | path:04610_8  |
| HUVEC | SP1 | 0.000203885 | path:04620_18 |
| HUVEC | SP1 | 0.001893526 | path:04620_9  |
| HUVEC | SP1 | 0.000231547 | path:04630_1  |
| HUVEC | SP1 | 0.001390056 | path:04630_2  |
| HUVEC | SP1 | 1.97E-06    | path:04630_3  |
| HUVEC | SP1 | 5.95E-06    | path:04630_4  |

|       |     |             |               |
|-------|-----|-------------|---------------|
| HUVEC | SP1 | 4.84E-05    | path:04650_20 |
| HUVEC | SP1 | 0.008608739 | path:04650_7  |
| HUVEC | SP1 | 0.000718519 | path:04722_19 |
| HUVEC | SP1 | 7.92E-07    | path:04810_29 |
| HUVEC | SP1 | 1.33E-05    | path:04912_8  |
| HUVEC | SP1 | 0.007433507 | path:04940_4  |
| HUVEC | SP1 | 0.006087664 | path:05014_3  |
| HUVEC | SP1 | 0.008608739 | path:05014_4  |
| HUVEC | SP1 | 0.007433507 | path:05016_8  |
| HUVEC | SP1 | 0.001014956 | path:05100_3  |
| HUVEC | SP1 | 0.008608739 | path:05140_10 |
| HUVEC | SP1 | 0.000245716 | path:05140_6  |
| HUVEC | SP1 | 0.001107767 | path:05142_10 |
| HUVEC | SP1 | 0.003931316 | path:05142_11 |
| HUVEC | SP1 | 0.003885876 | path:05142_17 |
| HUVEC | SP1 | 0.003885876 | path:05142_18 |
| HUVEC | SP1 | 0.000441307 | path:05142_20 |
| HUVEC | SP1 | 0.000718519 | path:05142_21 |
| HUVEC | SP1 | 0.001107767 | path:05142_4  |
| HUVEC | SP1 | 0.006087664 | path:05145_19 |
| HUVEC | SP1 | 0.001014956 | path:05145_21 |
| HUVEC | SP1 | 0.006087664 | path:05145_8  |
| HUVEC | SP1 | 1.23E-06    | path:05146_1  |
| HUVEC | SP1 | 7.92E-07    | path:05146_2  |
| HUVEC | SP1 | 0.002149604 | path:05146_5  |
| HUVEC | SP1 | 9.10E-07    | path:05146_9  |
| HUVEC | SP1 | 0.003935354 | path:05200_19 |
| HUVEC | SP1 | 0.003935354 | path:05200_20 |
| HUVEC | SP1 | 0.00927462  | path:05200_24 |
| HUVEC | SP1 | 9.21E-07    | path:05200_29 |
| HUVEC | SP1 | 2.01E-05    | path:05200_3  |
| HUVEC | SP1 | 0.000718519 | path:05200_31 |
| HUVEC | SP1 | 0.008608739 | path:05200_38 |
| HUVEC | SP1 | 0.000289957 | path:05200_4  |

|       |     |             |               |
|-------|-----|-------------|---------------|
| HUVEC | SP1 | 0.000718519 | path:05200_42 |
| HUVEC | SP1 | 2.07E-08    | path:05200_47 |
| HUVEC | SP1 | 1.33E-05    | path:05200_48 |
| HUVEC | SP1 | 5.07E-05    | path:05200_50 |
| HUVEC | SP1 | 5.54E-09    | path:05200_51 |
| HUVEC | SP1 | 1.55E-08    | path:05200_52 |
| HUVEC | SP1 | 4.11E-06    | path:05200_53 |
| HUVEC | SP1 | 0.001014956 | path:05200_56 |
| HUVEC | SP1 | 0.000441307 | path:05210_10 |
| HUVEC | SP1 | 0.000718519 | path:05210_12 |
| HUVEC | SP1 | 0.000718519 | path:05210_7  |
| HUVEC | SP1 | 1.44E-05    | path:05212_13 |
| HUVEC | SP1 | 0.008608739 | path:05212_14 |
| HUVEC | SP1 | 1.33E-05    | path:05214_12 |
| HUVEC | SP1 | 1.18E-07    | path:05214_13 |
| HUVEC | SP1 | 2.07E-08    | path:05214_14 |
| HUVEC | SP1 | 9.21E-07    | path:05214_15 |
| HUVEC | SP1 | 0.005536058 | path:05214_2  |
| HUVEC | SP1 | 0.000245716 | path:05214_21 |
| HUVEC | SP1 | 0.005536058 | path:05214_5  |
| HUVEC | SP1 | 0.001164758 | path:05215_10 |
| HUVEC | SP1 | 0.008608739 | path:05215_7  |
| HUVEC | SP1 | 0.000441307 | path:05216_4  |
| HUVEC | SP1 | 0.000411461 | path:05218_4  |
| HUVEC | SP1 | 0.000133832 | path:05218_5  |
| HUVEC | SP1 | 1.33E-05    | path:05218_6  |
| HUVEC | SP1 | 9.21E-07    | path:05218_7  |
| HUVEC | SP1 | 7.27E-05    | path:05218_8  |
| HUVEC | SP1 | 0.000310459 | path:05219_3  |
| HUVEC | SP1 | 1.44E-05    | path:05219_4  |
| HUVEC | SP1 | 9.21E-07    | path:05220_11 |
| HUVEC | SP1 | 1.18E-07    | path:05220_12 |
| HUVEC | SP1 | 0.002149604 | path:05220_5  |
| HUVEC | SP1 | 1.33E-05    | path:05220_8  |



|           |       |             |               |
|-----------|-------|-------------|---------------|
| HUVEC     | SP1   | 2.07E-08    | path:05220_9  |
| HUVEC     | SP1   | 0.006192277 | path:05221_1  |
| HUVEC     | SP1   | 5.36E-07    | path:05222_1  |
| HUVEC     | SP1   | 0.000133832 | path:05222_2  |
| HUVEC     | SP1   | 2.01E-05    | path:05222_4  |
| HUVEC     | SP1   | 0.001603207 | path:05222_7  |
| HUVEC     | SP1   | 1.44E-05    | path:05223_3  |
| HUVEC     | SP1   | 0.007433507 | path:05320_9  |
| HUVEC     | SP1   | 0.007433507 | path:05330_5  |
| HUVEC     | SP1   | 0.007433507 | path:05332_2  |
| HUVEC     | SP1   | 0.007433507 | path:05332_5  |
| HUVEC     | SP1   | 1.77E-05    | path:05414_2  |
| intestine | AKNA  | 6.20E-07    | path:04060_31 |
| intestine | AKNA  | 6.20E-07    | path:04514_10 |
| intestine | AKNA  | 6.20E-07    | path:04514_11 |
| intestine | AKNA  | 6.20E-07    | path:04514_12 |
| intestine | AKNA  | 6.20E-07    | path:04514_78 |
| intestine | AKNA  | 6.20E-07    | path:04514_9  |
| intestine | AKNA  | 6.20E-07    | path:04672_2  |
| intestine | AKNA  | 6.20E-07    | path:05144_9  |
| intestine | AKNA  | 6.20E-07    | path:05145_20 |
| intestine | AKNA  | 6.20E-07    | path:05310_2  |
| intestine | AKNA  | 6.20E-07    | path:05320_2  |
| intestine | AKNA  | 6.20E-07    | path:05320_5  |
| intestine | AKNA  | 6.20E-07    | path:05322_7  |
| intestine | AKNA  | 6.20E-07    | path:05330_12 |
| intestine | AKNA  | 6.20E-07    | path:05330_3  |
| intestine | AKNA  | 6.20E-07    | path:05416_3  |
| intestine | HNF1A | 0.008512637 | path:00120_5  |
| intestine | HNF1A | 0.008512637 | path:00140_1  |
| intestine | HNF1A | 3.95E-05    | path:00140_12 |
| intestine | HNF1A | 0.008512637 | path:00140_22 |
| intestine | HNF1A | 0.008512637 | path:00140_23 |
| intestine | HNF1A | 0.008512637 | path:00140_24 |

|           |       |             |               |
|-----------|-------|-------------|---------------|
| intestine | HNF1A | 0.008512637 | path:00140_25 |
| intestine | HNF1A | 0.008512637 | path:00140_26 |
| intestine | HNF1A | 0.008512637 | path:00982_6  |
| intestine | HNF1A | 0.008512637 | path:04610_6  |
| intestine | HNF4A | 0.00730316  | path:00120_15 |
| intestine | HNF4A | 0.003812707 | path:00120_19 |
| intestine | HNF4A | 0.001698537 | path:00120_6  |
| intestine | HNF4A | 0.003812707 | path:00120_7  |
| intestine | HNF4A | 0.000100826 | path:00120_9  |
| intestine | HNF4A | 0.001808381 | path:00590_1  |
| intestine | HNF4A | 0.001722691 | path:00590_2  |
| intestine | HNF4A | 0.001722691 | path:00590_3  |
| intestine | HNF4A | 0.001898001 | path:00590_4  |
| intestine | HNF4A | 0.000515682 | path:00591_1  |
| intestine | HNF4A | 2.36E-05    | path:00830_2  |
| intestine | HNF4A | 0.000733563 | path:00980_2  |
| intestine | HNF4A | 2.52E-07    | path:00982_10 |
| intestine | HNF4A | 5.38E-08    | path:00982_4  |
| intestine | HNF4A | 5.38E-08    | path:00982_5  |
| intestine | HNF4A | 5.38E-08    | path:00982_9  |
| intestine | HNF4A | 0.001131883 | path:03320_1  |
| intestine | HNF4A | 0.000100826 | path:03320_2  |
| intestine | HNF4A | 4.35E-06    | path:04610_2  |
| intestine | HNF4A | 4.35E-06    | path:04610_3  |
| intestine | HNF4A | 0.000100826 | path:04610_4  |
| intestine | HNF4A | 6.69E-06    | path:04610_5  |
| intestine | HNF4A | 0.000179282 | path:04610_6  |
| intestine | HNF4A | 0.001698537 | path:04610_8  |
| intestine | HNF4A | 0.000287791 | path:04950_4  |
| intestine | TP53  | 0.007702858 | path:04010_15 |
| intestine | TP53  | 0.009062653 | path:04010_16 |
| intestine | TP53  | 0.007443002 | path:04010_21 |
| intestine | TP53  | 0.002466645 | path:04012_12 |
| intestine | TP53  | 2.55E-11    | path:04110_1  |

|           |      |             |               |
|-----------|------|-------------|---------------|
| intestine | TP53 | 3.28E-07    | path:04110_17 |
| intestine | TP53 | 1.48E-05    | path:04110_19 |
| intestine | TP53 | 0.001943417 | path:04110_20 |
| intestine | TP53 | 7.56E-05    | path:04110_22 |
| intestine | TP53 | 0.000198814 | path:04110_23 |
| intestine | TP53 | 0.001943417 | path:04110_27 |
| intestine | TP53 | 0.000210553 | path:04110_3  |
| intestine | TP53 | 0.004511216 | path:04110_4  |
| intestine | TP53 | 4.42E-09    | path:04110_7  |
| intestine | TP53 | 0.004291125 | path:04110_8  |
| intestine | TP53 | 0           | path:04115_1  |
| intestine | TP53 | 0           | path:04115_2  |
| intestine | TP53 | 0           | path:04115_3  |
| intestine | TP53 | 0           | path:04115_4  |
| intestine | TP53 | 0           | path:04115_7  |
| intestine | TP53 | 0.000421718 | path:04210_20 |
| intestine | TP53 | 0.000275763 | path:04210_23 |
| intestine | TP53 | 0.000275763 | path:04210_24 |
| intestine | TP53 | 0.009131774 | path:04510_10 |
| intestine | TP53 | 0.004511216 | path:04510_15 |
| intestine | TP53 | 0.002466645 | path:04510_16 |
| intestine | TP53 | 0.000580605 | path:04510_17 |
| intestine | TP53 | 0.001774645 | path:04510_18 |
| intestine | TP53 | 0.006951959 | path:04510_25 |
| intestine | TP53 | 0.006951959 | path:04510_5  |
| intestine | TP53 | 0.009576653 | path:04510_6  |
| intestine | TP53 | 0.001110697 | path:04510_7  |
| intestine | TP53 | 0.00935253  | path:04510_8  |
| intestine | TP53 | 0.009062653 | path:04621_7  |
| intestine | TP53 | 0.000218217 | path:04722_19 |
| intestine | TP53 | 0.002756828 | path:04912_8  |
| intestine | TP53 | 0.009062653 | path:05014_4  |
| intestine | TP53 | 0.007459365 | path:05160_12 |
| intestine | TP53 | 0.009062653 | path:05160_15 |

|           |      |             |               |
|-----------|------|-------------|---------------|
| intestine | TP53 | 0.000338058 | path:05200_10 |
| intestine | TP53 | 0.000275763 | path:05200_11 |
| intestine | TP53 | 0.000275763 | path:05200_12 |
| intestine | TP53 | 0.000968321 | path:05200_15 |
| intestine | TP53 | 0.00392722  | path:05200_17 |
| intestine | TP53 | 0.002997803 | path:05200_19 |
| intestine | TP53 | 0.00011707  | path:05200_20 |
| intestine | TP53 | 0.000275763 | path:05200_4  |
| intestine | TP53 | 7.56E-05    | path:05200_47 |
| intestine | TP53 | 1.95E-05    | path:05200_48 |
| intestine | TP53 | 0.000367024 | path:05200_5  |
| intestine | TP53 | 0.000172314 | path:05200_51 |
| intestine | TP53 | 1.95E-05    | path:05200_8  |
| intestine | TP53 | 0.007459365 | path:05213_2  |
| intestine | TP53 | 0.003580594 | path:05214_1  |
| intestine | TP53 | 0.000210553 | path:05214_10 |
| intestine | TP53 | 0.001774645 | path:05214_11 |
| intestine | TP53 | 1.95E-05    | path:05214_12 |
| intestine | TP53 | 0.00011707  | path:05214_13 |
| intestine | TP53 | 7.56E-05    | path:05214_14 |
| intestine | TP53 | 0.003580594 | path:05214_4  |
| intestine | TP53 | 0.004511216 | path:05215_10 |
| intestine | TP53 | 0.000275763 | path:05215_11 |
| intestine | TP53 | 0.00331496  | path:05215_3  |
| intestine | TP53 | 0.002754132 | path:05218_2  |
| intestine | TP53 | 0.001774645 | path:05218_5  |
| intestine | TP53 | 1.95E-05    | path:05218_6  |
| intestine | TP53 | 0.001385048 | path:05218_8  |
| intestine | TP53 | 0.001691972 | path:05219_3  |
| intestine | TP53 | 0.009062653 | path:05219_4  |
| intestine | TP53 | 0.00011707  | path:05220_12 |
| intestine | TP53 | 1.95E-05    | path:05220_8  |
| intestine | TP53 | 7.56E-05    | path:05220_9  |
| Jurkat    | KLF4 | 4.70E-05    | path:04110_17 |

|        |      |             |               |
|--------|------|-------------|---------------|
| Jurkat | KLF4 | 4.70E-05    | path:04110_19 |
| Jurkat | KLF4 | 0.000691257 | path:04110_20 |
| Jurkat | KLF4 | 0.001048885 | path:04110_23 |
| Jurkat | KLF4 | 0.001048885 | path:04110_26 |
| Jurkat | KLF4 | 0.000691257 | path:04110_27 |
| Jurkat | KLF4 | 0.001048885 | path:04110_3  |
| Jurkat | KLF4 | 0.001048885 | path:04110_4  |
| Jurkat | KLF4 | 0.001498093 | path:04110_7  |
| Jurkat | KLF4 | 0.003364391 | path:04115_1  |
| Jurkat | KLF4 | 0.007702669 | path:04512_1  |
| Jurkat | KLF4 | 0.007702669 | path:04512_2  |
| Jurkat | KLF4 | 0.007140402 | path:04512_4  |
| Jurkat | KLF4 | 0.007140402 | path:04512_7  |
| Jurkat | KLF4 | 0.007140402 | path:04512_8  |
| Jurkat | KLF4 | 0.007140402 | path:05145_14 |
| Jurkat | KLF4 | 0.003572583 | path:05200_31 |
| Jurkat | KLF4 | 0.002858346 | path:05200_47 |
| Jurkat | KLF4 | 0.003572583 | path:05200_51 |
| Jurkat | KLF4 | 0.007103944 | path:05200_52 |
| Jurkat | KLF4 | 0.005224296 | path:05200_53 |
| Jurkat | KLF4 | 0.003572583 | path:05210_12 |
| Jurkat | KLF4 | 0.003572583 | path:05210_7  |
| Jurkat | KLF4 | 0.003364391 | path:05214_13 |
| Jurkat | KLF4 | 0.002858346 | path:05214_14 |
| Jurkat | KLF4 | 0.003572583 | path:05214_15 |
| Jurkat | KLF4 | 0.003572583 | path:05218_7  |
| Jurkat | KLF4 | 0.003572583 | path:05219_4  |
| Jurkat | KLF4 | 0.003572583 | path:05220_11 |
| Jurkat | KLF4 | 0.003364391 | path:05220_12 |
| Jurkat | KLF4 | 0.002858346 | path:05220_9  |
| Jurkat | RELA | 0.000137451 | path:04060_62 |
| Jurkat | RELA | 2.04E-07    | path:04062_1  |
| Jurkat | RELA | 3.87E-08    | path:04062_2  |
| Jurkat | RELA | 0.001869278 | path:04110_17 |

|        |        |             |               |
|--------|--------|-------------|---------------|
| Jurkat | RELA   | 0.001781655 | path:04110_19 |
| Jurkat | RELA   | 0.001869278 | path:04110_7  |
| Jurkat | RELA   | 0.0005539   | path:04115_1  |
| Jurkat | RELA   | 2.11E-06    | path:04620_1  |
| Jurkat | RELA   | 4.80E-09    | path:04620_12 |
| Jurkat | RELA   | 1.51E-07    | path:04620_13 |
| Jurkat | RELA   | 2.07E-07    | path:04620_14 |
| Jurkat | RELA   | 1.03E-08    | path:04620_16 |
| Jurkat | RELA   | 6.51E-08    | path:04620_17 |
| Jurkat | RELA   | 8.85E-09    | path:04620_18 |
| Jurkat | RELA   | 6.51E-08    | path:04620_22 |
| Jurkat | RELA   | 7.78E-08    | path:04620_9  |
| Jurkat | RELA   | 0.00197363  | path:04650_22 |
| Jurkat | RELA   | 0.001781655 | path:04650_23 |
| K562   | EGR1   | 0.009869535 | path:04060_8  |
| K562   | EGR1   | 0.00069989  | path:04510_10 |
| K562   | EGR1   | 0.00069989  | path:04510_18 |
| K562   | EGR1   | 0.003153788 | path:04510_6  |
| K562   | EGR1   | 0.003153788 | path:04510_8  |
| K562   | EGR1   | 0.00129686  | path:04512_3  |
| K562   | EGR1   | 0.003153788 | path:04540_13 |
| K562   | EGR1   | 0.003153788 | path:05146_9  |
| K562   | EGR1   | 0.007008495 | path:05212_11 |
| K562   | EGR1   | 0.008365691 | path:05212_12 |
| K562   | EGR1   | 0.003153788 | path:05218_4  |
| K562   | FOS    | 0.005719136 | path:04115_1  |
| K562   | FOS    | 0.006308233 | path:04310_7  |
| K562   | FOS    | 0.003173805 | path:04610_7  |
| K562   | FOS    | 0.006237239 | path:04620_17 |
| K562   | FOS    | 0.003173805 | path:04620_18 |
| K562   | FOS    | 0.006237239 | path:04620_22 |
| K562   | FOS    | 0.006237239 | path:04620_9  |
| K562   | FOS    | 2.16E-08    | path:05200_29 |
| K562   | NFE2L2 | 0.003129559 | path:00480_1  |

|              |        |             |               |
|--------------|--------|-------------|---------------|
| K562         | NFE2L2 | 2.02E-06    | path:00480_2  |
| K562         | NFE2L2 | 0.003129559 | path:00480_3  |
| K562         | NFE2L2 | 0.003129559 | path:00480_4  |
| K562         | NFE2L2 | 0.003129559 | path:00480_5  |
| K562         | NFE2L2 | 0.003129559 | path:00480_6  |
| K562         | RELA   | 0.000137451 | path:04060_62 |
| K562         | RELA   | 2.04E-07    | path:04062_1  |
| K562         | RELA   | 3.87E-08    | path:04062_2  |
| K562         | RELA   | 0.001869278 | path:04110_17 |
| K562         | RELA   | 0.001781655 | path:04110_19 |
| K562         | RELA   | 0.001869278 | path:04110_7  |
| K562         | RELA   | 0.0005539   | path:04115_1  |
| K562         | RELA   | 2.11E-06    | path:04620_1  |
| K562         | RELA   | 4.80E-09    | path:04620_12 |
| K562         | RELA   | 1.51E-07    | path:04620_13 |
| K562         | RELA   | 2.07E-07    | path:04620_14 |
| K562         | RELA   | 1.03E-08    | path:04620_16 |
| K562         | RELA   | 6.51E-08    | path:04620_17 |
| K562         | RELA   | 8.85E-09    | path:04620_18 |
| K562         | RELA   | 6.51E-08    | path:04620_22 |
| K562         | RELA   | 7.78E-08    | path:04620_9  |
| K562         | RELA   | 0.00197363  | path:04650_22 |
| K562         | RELA   | 0.001781655 | path:04650_23 |
| Keratinocyte | CEBPA  | 0.0042174   | path:04060_54 |
| Keratinocyte | CEBPA  | 0.00918123  | path:04610_3  |
| Keratinocyte | CEBPA  | 0.00018207  | path:04610_4  |
| Keratinocyte | CEBPA  | 0.00018207  | path:04610_6  |
| Keratinocyte | TFAP2A | 0.005723968 | path:04020_2  |
| Keratinocyte | TFAP2A | 0.003857334 | path:04080_7  |
| Keratinocyte | TFAP2A | 0.00057548  | path:04144_2  |
| Keratinocyte | TFAP2A | 0.001269093 | path:04510_10 |
| Keratinocyte | TFAP2A | 0.005458314 | path:04510_15 |
| Keratinocyte | TFAP2A | 0.003332624 | path:04510_16 |
| Keratinocyte | TFAP2A | 3.81E-05    | path:04510_17 |

|              |        |             |               |
|--------------|--------|-------------|---------------|
| Keratinocyte | TFAP2A | 1.42E-05    | path:04510_18 |
| Keratinocyte | TFAP2A | 0.007739985 | path:04510_25 |
| Keratinocyte | TFAP2A | 0.007739985 | path:04510_5  |
| Keratinocyte | TFAP2A | 0.001276164 | path:04510_6  |
| Keratinocyte | TFAP2A | 8.35E-05    | path:04510_7  |
| Keratinocyte | TFAP2A | 0.001271633 | path:04510_8  |
| Keratinocyte | TFAP2A | 0.002407854 | path:04520_2  |
| Keratinocyte | TFAP2A | 0.001262516 | path:04520_3  |
| Keratinocyte | TFAP2A | 0.00057548  | path:04520_5  |
| Keratinocyte | TFAP2A | 0.001262516 | path:04520_7  |
| Keratinocyte | TFAP2A | 0.009046641 | path:04520_9  |
| Keratinocyte | TFAP2A | 0.003857334 | path:04912_8  |
| Keratinocyte | TFAP2A | 2.20E-05    | path:05200_10 |
| Keratinocyte | TFAP2A | 1.91E-05    | path:05200_11 |
| Keratinocyte | TFAP2A | 1.91E-05    | path:05200_12 |
| Keratinocyte | TFAP2A | 6.62E-06    | path:05200_15 |
| Keratinocyte | TFAP2A | 0.000448647 | path:05200_21 |
| Keratinocyte | TFAP2A | 8.35E-05    | path:05200_29 |
| Keratinocyte | TFAP2A | 1.91E-05    | path:05200_4  |
| Keratinocyte | TFAP2A | 2.22E-05    | path:05200_5  |
| Keratinocyte | TFAP2A | 2.16E-06    | path:05200_8  |
| Keratinocyte | TFAP2A | 0.002699451 | path:05212_11 |
| Keratinocyte | TFAP2A | 0.003332624 | path:05212_12 |
| Keratinocyte | TFAP2A | 0.004058678 | path:05214_1  |
| Keratinocyte | TFAP2A | 0.000317116 | path:05214_10 |
| Keratinocyte | TFAP2A | 0.002407854 | path:05214_11 |
| Keratinocyte | TFAP2A | 0.007739985 | path:05214_16 |
| Keratinocyte | TFAP2A | 0.004058678 | path:05214_17 |
| Keratinocyte | TFAP2A | 0.004058678 | path:05214_2  |
| Keratinocyte | TFAP2A | 0.004058678 | path:05214_3  |
| Keratinocyte | TFAP2A | 0.004058678 | path:05214_4  |
| Keratinocyte | TFAP2A | 0.004058678 | path:05214_5  |
| Keratinocyte | TFAP2A | 0.004058678 | path:05214_6  |
| Keratinocyte | TFAP2A | 0.007739985 | path:05214_7  |



|              |        |             |               |
|--------------|--------|-------------|---------------|
| Keratinocyte | TFAP2A | 0.004058678 | path:05214_8  |
| Keratinocyte | TFAP2A | 0.000317116 | path:05215_10 |
| Keratinocyte | TFAP2A | 0.000436788 | path:05215_11 |
| Keratinocyte | TFAP2A | 0.001124594 | path:05215_8  |
| Keratinocyte | TFAP2A | 0.002407854 | path:05219_2  |
| Keratinocyte | TP63   | 2.23E-05    | path:04110_1  |
| Keratinocyte | TP63   | 8.12E-05    | path:04110_7  |
| Keratinocyte | TP63   | 8.12E-05    | path:04115_1  |
| Keratinocyte | TP63   | 8.12E-05    | path:04115_2  |
| Keratinocyte | TP63   | 8.12E-05    | path:04115_3  |
| Keratinocyte | TP63   | 8.12E-05    | path:04115_4  |
| Keratinocyte | TP63   | 8.12E-05    | path:04115_7  |
| Keratinocyte | TP63   | 0.003115907 | path:05200_17 |
| Keratinocyte | TP63   | 0.002783081 | path:05200_19 |
| Keratinocyte | TP63   | 0.002783081 | path:05200_20 |
| Keratinocyte | TP63   | 0.000159403 | path:05200_47 |
| Keratinocyte | TP63   | 8.12E-05    | path:05200_48 |
| Keratinocyte | TP63   | 8.12E-05    | path:05214_12 |
| Keratinocyte | TP63   | 0.000159403 | path:05214_14 |
| Keratinocyte | TP63   | 0.004120782 | path:05215_11 |
| Keratinocyte | TP63   | 0.002837304 | path:05215_3  |
| Keratinocyte | TP63   | 8.12E-05    | path:05218_6  |
| Keratinocyte | TP63   | 8.12E-05    | path:05220_8  |
| Keratinocyte | TP63   | 0.000159403 | path:05220_9  |
| kidney       | CREB1  | 0.004288489 | path:04514_1  |
| kidney       | CREB1  | 0.004288489 | path:04514_3  |
| kidney       | CREB1  | 0.004288489 | path:04612_3  |
| kidney       | CREB1  | 0.004131401 | path:04620_12 |
| kidney       | CREB1  | 0.004131401 | path:04620_16 |
| kidney       | CREB1  | 0.001277819 | path:04620_17 |
| kidney       | CREB1  | 0.000627719 | path:04620_18 |
| kidney       | CREB1  | 0.001277819 | path:04620_22 |
| kidney       | CREB1  | 0.001277819 | path:04620_9  |
| kidney       | CREB1  | 0.004131401 | path:04672_4  |

|        |       |             |               |
|--------|-------|-------------|---------------|
| kidney | CREB1 | 0.004131401 | path:04672_5  |
| kidney | CREB1 | 0.004131401 | path:04940_1  |
| kidney | CREB1 | 0.004288489 | path:05150_14 |
| kidney | CREB1 | 0.009649083 | path:05200_18 |
| kidney | CREB1 | 0.004131401 | path:05310_1  |
| kidney | CREB1 | 0.004131401 | path:05310_3  |
| kidney | CREB1 | 0.004131401 | path:05320_1  |
| kidney | CREB1 | 0.004131401 | path:05320_3  |
| kidney | CREB1 | 0.004131401 | path:05320_4  |
| kidney | CREB1 | 0.004131401 | path:05320_6  |
| kidney | CREB1 | 0.004131401 | path:05322_5  |
| kidney | CREB1 | 0.004131401 | path:05322_6  |
| kidney | CREB1 | 0.004131401 | path:05330_1  |
| kidney | CREB1 | 0.004131401 | path:05330_2  |
| kidney | CREB1 | 0.004131401 | path:05330_4  |
| kidney | CREB1 | 0.004131401 | path:05332_1  |
| kidney | CREB1 | 0.004131401 | path:05416_4  |
| kidney | HNF1A | 0.008512637 | path:00120_5  |
| kidney | HNF1A | 0.008512637 | path:00140_1  |
| kidney | HNF1A | 3.95E-05    | path:00140_12 |
| kidney | HNF1A | 0.008512637 | path:00140_22 |
| kidney | HNF1A | 0.008512637 | path:00140_23 |
| kidney | HNF1A | 0.008512637 | path:00140_24 |
| kidney | HNF1A | 0.008512637 | path:00140_25 |
| kidney | HNF1A | 0.008512637 | path:00140_26 |
| kidney | HNF1A | 0.008512637 | path:00982_6  |
| kidney | HNF1A | 0.008512637 | path:04610_6  |
| kidney | HNF4A | 0.00730316  | path:00120_15 |
| kidney | HNF4A | 0.003812707 | path:00120_19 |
| kidney | HNF4A | 0.001698537 | path:00120_6  |
| kidney | HNF4A | 0.003812707 | path:00120_7  |
| kidney | HNF4A | 0.000100826 | path:00120_9  |
| kidney | HNF4A | 0.001808381 | path:00590_1  |
| kidney | HNF4A | 0.001722691 | path:00590_2  |

|          |        |             |               |
|----------|--------|-------------|---------------|
| kidney   | HNF4A  | 0.001722691 | path:00590_3  |
| kidney   | HNF4A  | 0.001898001 | path:00590_4  |
| kidney   | HNF4A  | 0.000515682 | path:00591_1  |
| kidney   | HNF4A  | 2.36E-05    | path:00830_2  |
| kidney   | HNF4A  | 0.000733563 | path:00980_2  |
| kidney   | HNF4A  | 2.52E-07    | path:00982_10 |
| kidney   | HNF4A  | 5.38E-08    | path:00982_4  |
| kidney   | HNF4A  | 5.38E-08    | path:00982_5  |
| kidney   | HNF4A  | 5.38E-08    | path:00982_9  |
| kidney   | HNF4A  | 0.001131883 | path:03320_1  |
| kidney   | HNF4A  | 0.000100826 | path:03320_2  |
| kidney   | HNF4A  | 4.35E-06    | path:04610_2  |
| kidney   | HNF4A  | 4.35E-06    | path:04610_3  |
| kidney   | HNF4A  | 0.000100826 | path:04610_4  |
| kidney   | HNF4A  | 6.69E-06    | path:04610_5  |
| kidney   | HNF4A  | 0.000179282 | path:04610_6  |
| kidney   | HNF4A  | 0.001698537 | path:04610_8  |
| kidney   | HNF4A  | 0.000287791 | path:04950_4  |
| kidney   | NR1I3  | 0.000186607 | path:00830_2  |
| kidney   | NR1I3  | 0.006275482 | path:00980_1  |
| kidney   | NR1I3  | 0.000535628 | path:00982_4  |
| kidney   | NR1I3  | 0.000535628 | path:00982_5  |
| kidney   | NR1I3  | 0.000535628 | path:00982_9  |
| kidney   | SREBF1 | 0.009882974 | path:00100_9  |
| kidney   | SREBF1 | 0.009882974 | path:03320_2  |
| kidney   | SREBF1 | 3.27E-05    | path:04910_5  |
| kidney   | SREBF1 | 0.00143191  | path:04910_6  |
| leukemia | SPI1   | 0.00153244  | path:04060_41 |
| leukemia | SPI1   | 0.005348786 | path:04145_2  |
| leukemia | SPI1   | 3.11E-06    | path:04145_6  |
| leukemia | SPI1   | 0.007630608 | path:04514_55 |
| leukemia | SPI1   | 0.003570772 | path:04514_62 |
| leukemia | SPI1   | 0.008430928 | path:04650_10 |
| leukemia | SPI1   | 0.007340609 | path:04650_12 |

|          |       |             |               |
|----------|-------|-------------|---------------|
| leukemia | SPI1  | 0.003805584 | path:04650_13 |
| leukemia | SPI1  | 0.003570772 | path:04670_10 |
| leukemia | SPI1  | 0.00153244  | path:04670_14 |
| leukemia | SPI1  | 0.000961365 | path:04670_15 |
| leukemia | SPI1  | 0.000252274 | path:04670_2  |
| leukemia | SPI1  | 0.000110411 | path:05140_4  |
| leukemia | SPI1  | 0.005348786 | path:05150_17 |
| leukemia | SPI1  | 0.000902646 | path:05200_43 |
| leukemia | TP73  | 6.75E-05    | path:04115_1  |
| leukemia | TP73  | 6.67E-05    | path:04115_2  |
| leukemia | TP73  | 6.67E-05    | path:04115_3  |
| leukemia | TP73  | 6.67E-05    | path:04115_4  |
| leukemia | TP73  | 6.67E-05    | path:04115_7  |
| leukemia | TP73  | 0.000595015 | path:04722_19 |
| liver    | AKNA  | 6.20E-07    | path:04060_31 |
| liver    | AKNA  | 6.20E-07    | path:04514_10 |
| liver    | AKNA  | 6.20E-07    | path:04514_11 |
| liver    | AKNA  | 6.20E-07    | path:04514_12 |
| liver    | AKNA  | 6.20E-07    | path:04514_78 |
| liver    | AKNA  | 6.20E-07    | path:04514_9  |
| liver    | AKNA  | 6.20E-07    | path:04672_2  |
| liver    | AKNA  | 6.20E-07    | path:05144_9  |
| liver    | AKNA  | 6.20E-07    | path:05145_20 |
| liver    | AKNA  | 6.20E-07    | path:05310_2  |
| liver    | AKNA  | 6.20E-07    | path:05320_2  |
| liver    | AKNA  | 6.20E-07    | path:05320_5  |
| liver    | AKNA  | 6.20E-07    | path:05322_7  |
| liver    | AKNA  | 6.20E-07    | path:05330_12 |
| liver    | AKNA  | 6.20E-07    | path:05330_3  |
| liver    | AKNA  | 6.20E-07    | path:05416_3  |
| liver    | CREB1 | 0.004288489 | path:04514_1  |
| liver    | CREB1 | 0.004288489 | path:04514_3  |
| liver    | CREB1 | 0.004288489 | path:04612_3  |
| liver    | CREB1 | 0.004131401 | path:04620_12 |

|       |       |             |               |
|-------|-------|-------------|---------------|
| liver | CREB1 | 0.004131401 | path:04620_16 |
| liver | CREB1 | 0.001277819 | path:04620_17 |
| liver | CREB1 | 0.000627719 | path:04620_18 |
| liver | CREB1 | 0.001277819 | path:04620_22 |
| liver | CREB1 | 0.001277819 | path:04620_9  |
| liver | CREB1 | 0.004131401 | path:04672_4  |
| liver | CREB1 | 0.004131401 | path:04672_5  |
| liver | CREB1 | 0.004131401 | path:04940_1  |
| liver | CREB1 | 0.004288489 | path:05150_14 |
| liver | CREB1 | 0.009649083 | path:05200_18 |
| liver | CREB1 | 0.004131401 | path:05310_1  |
| liver | CREB1 | 0.004131401 | path:05310_3  |
| liver | CREB1 | 0.004131401 | path:05320_1  |
| liver | CREB1 | 0.004131401 | path:05320_3  |
| liver | CREB1 | 0.004131401 | path:05320_4  |
| liver | CREB1 | 0.004131401 | path:05320_6  |
| liver | CREB1 | 0.004131401 | path:05322_5  |
| liver | CREB1 | 0.004131401 | path:05322_6  |
| liver | CREB1 | 0.004131401 | path:05330_1  |
| liver | CREB1 | 0.004131401 | path:05330_2  |
| liver | CREB1 | 0.004131401 | path:05330_4  |
| liver | CREB1 | 0.004131401 | path:05332_1  |
| liver | CREB1 | 0.004131401 | path:05416_4  |
| liver | FOXA2 | 0.000581017 | path:04610_3  |
| liver | FOXA2 | 0.000581017 | path:04610_4  |
| liver | FOXA2 | 0.000581017 | path:04610_6  |
| liver | FOXA3 | 0.000327469 | path:00140_1  |
| liver | FOXA3 | 0.000188543 | path:00140_11 |
| liver | FOXA3 | 0.000502586 | path:00140_12 |
| liver | FOXA3 | 0.000327469 | path:00140_25 |
| liver | FOXA3 | 0.000327469 | path:00140_26 |
| liver | FOXA3 | 0.000312584 | path:00591_1  |
| liver | FOXA3 | 0.000975791 | path:00830_2  |
| liver | FOXA3 | 0.000327469 | path:00980_2  |

|       |       |             |               |
|-------|-------|-------------|---------------|
| liver | FOXA3 | 7.28E-05    | path:00982_10 |
| liver | FOXA3 | 2.48E-05    | path:00982_11 |
| liver | FOXA3 | 5.58E-05    | path:00982_2  |
| liver | FOXA3 | 2.48E-05    | path:00982_3  |
| liver | FOXA3 | 5.10E-05    | path:00982_4  |
| liver | FOXA3 | 5.10E-05    | path:00982_5  |
| liver | FOXA3 | 0.000248984 | path:00982_6  |
| liver | FOXA3 | 2.48E-05    | path:00982_7  |
| liver | FOXA3 | 2.48E-05    | path:00982_8  |
| liver | FOXA3 | 5.10E-05    | path:00982_9  |
| liver | HNF1A | 0.008512637 | path:00120_5  |
| liver | HNF1A | 0.008512637 | path:00140_1  |
| liver | HNF1A | 3.95E-05    | path:00140_12 |
| liver | HNF1A | 0.008512637 | path:00140_22 |
| liver | HNF1A | 0.008512637 | path:00140_23 |
| liver | HNF1A | 0.008512637 | path:00140_24 |
| liver | HNF1A | 0.008512637 | path:00140_25 |
| liver | HNF1A | 0.008512637 | path:00140_26 |
| liver | HNF1A | 0.008512637 | path:00982_6  |
| liver | HNF1A | 0.008512637 | path:04610_6  |
| liver | HNF4A | 0.00730316  | path:00120_15 |
| liver | HNF4A | 0.003812707 | path:00120_19 |
| liver | HNF4A | 0.001698537 | path:00120_6  |
| liver | HNF4A | 0.003812707 | path:00120_7  |
| liver | HNF4A | 0.000100826 | path:00120_9  |
| liver | HNF4A | 0.001808381 | path:00590_1  |
| liver | HNF4A | 0.001722691 | path:00590_2  |
| liver | HNF4A | 0.001722691 | path:00590_3  |
| liver | HNF4A | 0.001898001 | path:00590_4  |
| liver | HNF4A | 0.000515682 | path:00591_1  |
| liver | HNF4A | 2.36E-05    | path:00830_2  |
| liver | HNF4A | 0.000733563 | path:00980_2  |
| liver | HNF4A | 2.52E-07    | path:00982_10 |
| liver | HNF4A | 5.38E-08    | path:00982_4  |

|       |       |             |               |
|-------|-------|-------------|---------------|
| liver | HN4A  | 5.38E-08    | path:00982_5  |
| liver | HN4A  | 5.38E-08    | path:00982_9  |
| liver | HN4A  | 0.001131883 | path:03320_1  |
| liver | HN4A  | 0.000100826 | path:03320_2  |
| liver | HN4A  | 4.35E-06    | path:04610_2  |
| liver | HN4A  | 4.35E-06    | path:04610_3  |
| liver | HN4A  | 0.000100826 | path:04610_4  |
| liver | HN4A  | 6.69E-06    | path:04610_5  |
| liver | HN4A  | 0.000179282 | path:04610_6  |
| liver | HN4A  | 0.001698537 | path:04610_8  |
| liver | HN4A  | 0.000287791 | path:04950_4  |
| liver | NR1I2 | 0.004391058 | path:00830_2  |
| liver | NR1I2 | 0.00011908  | path:00982_4  |
| liver | NR1I2 | 0.00011908  | path:00982_5  |
| liver | NR1I2 | 0.00011908  | path:00982_9  |
| liver | NR1I3 | 0.000186607 | path:00830_2  |
| liver | NR1I3 | 0.006275482 | path:00980_1  |
| liver | NR1I3 | 0.000535628 | path:00982_4  |
| liver | NR1I3 | 0.000535628 | path:00982_5  |
| liver | NR1I3 | 0.000535628 | path:00982_9  |
| liver | NR4A1 | 0.00077713  | path:00140_10 |
| liver | NR4A1 | 6.42E-06    | path:00140_13 |
| liver | NR4A1 | 0.00077713  | path:00140_14 |
| liver | NR4A1 | 0.00077713  | path:00140_16 |
| liver | NR4A1 | 0.00077713  | path:00140_18 |
| liver | NR4A1 | 0.000832486 | path:00140_19 |
| liver | NR4A1 | 0.00077713  | path:00140_20 |
| liver | NR4A1 | 0.00077713  | path:00140_3  |
| liver | NR4A1 | 0.00077713  | path:00140_4  |
| liver | NR4A1 | 0.000960385 | path:00140_5  |
| liver | NR4A1 | 0.001089761 | path:00140_6  |
| liver | NR4A1 | 0.000832486 | path:00140_7  |
| liver | NR4A1 | 0.00077713  | path:00140_8  |
| liver | NR4A1 | 0.00077713  | path:00140_9  |

|       |        |             |               |
|-------|--------|-------------|---------------|
| liver | SPI1   | 0.00153244  | path:04060_41 |
| liver | SPI1   | 0.005348786 | path:04145_2  |
| liver | SPI1   | 3.11E-06    | path:04145_6  |
| liver | SPI1   | 0.007630608 | path:04514_55 |
| liver | SPI1   | 0.003570772 | path:04514_62 |
| liver | SPI1   | 0.008430928 | path:04650_10 |
| liver | SPI1   | 0.007340609 | path:04650_12 |
| liver | SPI1   | 0.003805584 | path:04650_13 |
| liver | SPI1   | 0.003570772 | path:04670_10 |
| liver | SPI1   | 0.00153244  | path:04670_14 |
| liver | SPI1   | 0.000961365 | path:04670_15 |
| liver | SPI1   | 0.000252274 | path:04670_2  |
| liver | SPI1   | 0.000110411 | path:05140_4  |
| liver | SPI1   | 0.005348786 | path:05150_17 |
| liver | SPI1   | 0.000902646 | path:05200_43 |
| liver | SREBF1 | 0.009882974 | path:00100_9  |
| liver | SREBF1 | 0.009882974 | path:03320_2  |
| liver | SREBF1 | 3.27E-05    | path:04910_5  |
| liver | SREBF1 | 0.00143191  | path:04910_6  |
| LNCaP | NFIC   | 0.004396514 | path:00591_1  |
| LNCaP | NFIC   | 0.005988829 | path:00982_11 |
| LNCaP | NFIC   | 0.00921451  | path:00982_2  |
| LNCaP | NFIC   | 0.005988829 | path:00982_3  |
| LNCaP | NFIC   | 0.00787147  | path:00982_4  |
| LNCaP | NFIC   | 0.00787147  | path:00982_5  |
| LNCaP | NFIC   | 0.004396514 | path:00982_7  |
| LNCaP | NFIC   | 0.004396514 | path:00982_8  |
| LNCaP | NFIC   | 0.00787147  | path:00982_9  |
| LNCaP | NFIC   | 0.00787147  | path:04010_30 |
| LNCaP | NFIC   | 0.00787147  | path:04010_31 |
| LNCaP | NFIC   | 0.004396514 | path:04080_7  |
| LNCaP | NFIC   | 0.008000492 | path:04115_1  |
| LNCaP | NFIC   | 0.00787147  | path:04115_2  |
| LNCaP | NFIC   | 0.00787147  | path:04115_3  |



|       |        |             |               |
|-------|--------|-------------|---------------|
| LNCaP | NFIC   | 0.00787147  | path:04115_4  |
| LNCaP | NFIC   | 0.00787147  | path:04115_7  |
| LNCaP | NFIC   | 0.00787147  | path:04660_8  |
| LNCaP | NFIC   | 0.00787147  | path:04662_6  |
| LNCaP | NFIC   | 0.00787147  | path:04722_19 |
| LNCaP | NFIC   | 0.00787147  | path:05160_15 |
| LNCaP | NFIC   | 0.007050709 | path:05200_47 |
| LNCaP | NFIC   | 0.004396514 | path:05200_48 |
| LNCaP | NFIC   | 0.00787147  | path:05200_51 |
| LNCaP | NFIC   | 0.004396514 | path:05214_12 |
| LNCaP | NFIC   | 0.00787147  | path:05214_13 |
| LNCaP | NFIC   | 0.007050709 | path:05214_14 |
| LNCaP | NFIC   | 0.004396514 | path:05218_5  |
| LNCaP | NFIC   | 0.004396514 | path:05218_6  |
| LNCaP | NFIC   | 0.00787147  | path:05220_12 |
| LNCaP | NFIC   | 0.004396514 | path:05220_8  |
| LNCaP | NFIC   | 0.007050709 | path:05220_9  |
| lung  | NR113  | 0.000186607 | path:00830_2  |
| lung  | NR113  | 0.006275482 | path:00980_1  |
| lung  | NR113  | 0.000535628 | path:00982_4  |
| lung  | NR113  | 0.000535628 | path:00982_5  |
| lung  | NR113  | 0.000535628 | path:00982_9  |
| lung  | SREBF1 | 0.009882974 | path:00100_9  |
| lung  | SREBF1 | 0.009882974 | path:03320_2  |
| lung  | SREBF1 | 3.27E-05    | path:04910_5  |
| lung  | SREBF1 | 0.00143191  | path:04910_6  |
| lung  | TP63   | 2.23E-05    | path:04110_1  |
| lung  | TP63   | 8.12E-05    | path:04110_7  |
| lung  | TP63   | 8.12E-05    | path:04115_1  |
| lung  | TP63   | 8.12E-05    | path:04115_2  |
| lung  | TP63   | 8.12E-05    | path:04115_3  |
| lung  | TP63   | 8.12E-05    | path:04115_4  |
| lung  | TP63   | 8.12E-05    | path:04115_7  |
| lung  | TP63   | 0.003115907 | path:05200_17 |

|            |      |             |               |
|------------|------|-------------|---------------|
| lung       | TP63 | 0.002783081 | path:05200_19 |
| lung       | TP63 | 0.002783081 | path:05200_20 |
| lung       | TP63 | 0.000159403 | path:05200_47 |
| lung       | TP63 | 8.12E-05    | path:05200_48 |
| lung       | TP63 | 8.12E-05    | path:05214_12 |
| lung       | TP63 | 0.000159403 | path:05214_14 |
| lung       | TP63 | 0.004120782 | path:05215_11 |
| lung       | TP63 | 0.002837304 | path:05215_3  |
| lung       | TP63 | 8.12E-05    | path:05218_6  |
| lung       | TP63 | 8.12E-05    | path:05220_8  |
| lung       | TP63 | 0.000159403 | path:05220_9  |
| lymph node | AKNA | 6.20E-07    | path:04060_31 |
| lymph node | AKNA | 6.20E-07    | path:04514_10 |
| lymph node | AKNA | 6.20E-07    | path:04514_11 |
| lymph node | AKNA | 6.20E-07    | path:04514_12 |
| lymph node | AKNA | 6.20E-07    | path:04514_78 |
| lymph node | AKNA | 6.20E-07    | path:04514_9  |
| lymph node | AKNA | 6.20E-07    | path:04672_2  |
| lymph node | AKNA | 6.20E-07    | path:05144_9  |
| lymph node | AKNA | 6.20E-07    | path:05145_20 |
| lymph node | AKNA | 6.20E-07    | path:05310_2  |
| lymph node | AKNA | 6.20E-07    | path:05320_2  |
| lymph node | AKNA | 6.20E-07    | path:05320_5  |
| lymph node | AKNA | 6.20E-07    | path:05322_7  |
| lymph node | AKNA | 6.20E-07    | path:05330_12 |
| lymph node | AKNA | 6.20E-07    | path:05330_3  |
| lymph node | AKNA | 6.20E-07    | path:05416_3  |
| lymph node | IRF5 | 0.005011517 | path:04060_38 |
| lymph node | IRF5 | 0.005011517 | path:04620_11 |
| lymph node | IRF5 | 0.005011517 | path:04620_2  |
| lymph node | IRF5 | 0.005011517 | path:04650_6  |
| lymph node | IRF5 | 0.005011517 | path:05160_6  |
| lymph node | IRF7 | 5.44E-05    | path:04060_38 |
| lymph node | IRF7 | 3.65E-07    | path:04620_11 |

|             |       |             |               |
|-------------|-------|-------------|---------------|
| lymph node  | IRF7  | 1.24E-05    | path:04620_12 |
| lymph node  | IRF7  | 0.005131788 | path:04620_14 |
| lymph node  | IRF7  | 0.005500251 | path:04620_16 |
| lymph node  | IRF7  | 0.009380523 | path:04620_17 |
| lymph node  | IRF7  | 0.005305274 | path:04620_18 |
| lymph node  | IRF7  | 3.65E-07    | path:04620_2  |
| lymph node  | IRF7  | 0.009380523 | path:04620_22 |
| lymph node  | IRF7  | 0.009501335 | path:04620_9  |
| lymph node  | IRF7  | 5.75E-05    | path:04650_6  |
| lymph node  | IRF7  | 5.75E-05    | path:05160_6  |
| lymph node  | TP73  | 6.75E-05    | path:04115_1  |
| lymph node  | TP73  | 6.67E-05    | path:04115_2  |
| lymph node  | TP73  | 6.67E-05    | path:04115_3  |
| lymph node  | TP73  | 6.67E-05    | path:04115_4  |
| lymph node  | TP73  | 6.67E-05    | path:04115_7  |
| lymph node  | TP73  | 0.000595015 | path:04722_19 |
| lymphocytes | AKNA  | 6.20E-07    | path:04060_31 |
| lymphocytes | AKNA  | 6.20E-07    | path:04514_10 |
| lymphocytes | AKNA  | 6.20E-07    | path:04514_11 |
| lymphocytes | AKNA  | 6.20E-07    | path:04514_12 |
| lymphocytes | AKNA  | 6.20E-07    | path:04514_78 |
| lymphocytes | AKNA  | 6.20E-07    | path:04514_9  |
| lymphocytes | AKNA  | 6.20E-07    | path:04672_2  |
| lymphocytes | AKNA  | 6.20E-07    | path:05144_9  |
| lymphocytes | AKNA  | 6.20E-07    | path:05145_20 |
| lymphocytes | AKNA  | 6.20E-07    | path:05310_2  |
| lymphocytes | AKNA  | 6.20E-07    | path:05320_2  |
| lymphocytes | AKNA  | 6.20E-07    | path:05320_5  |
| lymphocytes | AKNA  | 6.20E-07    | path:05322_7  |
| lymphocytes | AKNA  | 6.20E-07    | path:05330_12 |
| lymphocytes | AKNA  | 6.20E-07    | path:05330_3  |
| lymphocytes | AKNA  | 6.20E-07    | path:05416_3  |
| lymphocytes | CREB1 | 0.004288489 | path:04514_1  |
| lymphocytes | CREB1 | 0.004288489 | path:04514_3  |

|             |       |             |               |
|-------------|-------|-------------|---------------|
| lymphocytes | CREB1 | 0.004288489 | path:04612_3  |
| lymphocytes | CREB1 | 0.004131401 | path:04620_12 |
| lymphocytes | CREB1 | 0.004131401 | path:04620_16 |
| lymphocytes | CREB1 | 0.001277819 | path:04620_17 |
| lymphocytes | CREB1 | 0.000627719 | path:04620_18 |
| lymphocytes | CREB1 | 0.001277819 | path:04620_22 |
| lymphocytes | CREB1 | 0.001277819 | path:04620_9  |
| lymphocytes | CREB1 | 0.004131401 | path:04672_4  |
| lymphocytes | CREB1 | 0.004131401 | path:04672_5  |
| lymphocytes | CREB1 | 0.004131401 | path:04940_1  |
| lymphocytes | CREB1 | 0.004288489 | path:05150_14 |
| lymphocytes | CREB1 | 0.009649083 | path:05200_18 |
| lymphocytes | CREB1 | 0.004131401 | path:05310_1  |
| lymphocytes | CREB1 | 0.004131401 | path:05310_3  |
| lymphocytes | CREB1 | 0.004131401 | path:05320_1  |
| lymphocytes | CREB1 | 0.004131401 | path:05320_3  |
| lymphocytes | CREB1 | 0.004131401 | path:05320_4  |
| lymphocytes | CREB1 | 0.004131401 | path:05320_6  |
| lymphocytes | CREB1 | 0.004131401 | path:05322_5  |
| lymphocytes | CREB1 | 0.004131401 | path:05322_6  |
| lymphocytes | CREB1 | 0.004131401 | path:05330_1  |
| lymphocytes | CREB1 | 0.004131401 | path:05330_2  |
| lymphocytes | CREB1 | 0.004131401 | path:05330_4  |
| lymphocytes | CREB1 | 0.004131401 | path:05332_1  |
| lymphocytes | CREB1 | 0.004131401 | path:05416_4  |
| lymphocytes | NFYA  | 0.00144529  | path:04110_1  |
| lymphocytes | NFYA  | 0.005383343 | path:04110_11 |
| lymphocytes | NFYA  | 0.003794515 | path:04110_12 |
| lymphocytes | NFYA  | 0.000340548 | path:04110_17 |
| lymphocytes | NFYA  | 0.005565492 | path:04110_19 |
| lymphocytes | NFYA  | 0.002132484 | path:04110_22 |
| lymphocytes | NFYA  | 0.000299258 | path:04110_23 |
| lymphocytes | NFYA  | 0.004551637 | path:04110_26 |
| lymphocytes | NFYA  | 0.000299258 | path:04110_3  |

|             |      |             |               |
|-------------|------|-------------|---------------|
| lymphocytes | NFYA | 0.004713566 | path:04110_4  |
| lymphocytes | NFYA | 0.000340548 | path:04110_7  |
| lymphocytes | NFYA | 0.004551637 | path:04110_8  |
| lymphocytes | NFYA | 0.001111281 | path:04115_1  |
| lymphocytes | NFYA | 0.000123767 | path:04115_2  |
| lymphocytes | NFYA | 0.000776011 | path:04115_3  |
| lymphocytes | NFYA | 0.000776011 | path:04115_4  |
| lymphocytes | NFYA | 0.000776011 | path:04115_7  |
| lymphocytes | TP53 | 0.007702858 | path:04010_15 |
| lymphocytes | TP53 | 0.009062653 | path:04010_16 |
| lymphocytes | TP53 | 0.007443002 | path:04010_21 |
| lymphocytes | TP53 | 0.002466645 | path:04012_12 |
| lymphocytes | TP53 | 2.55E-11    | path:04110_1  |
| lymphocytes | TP53 | 3.28E-07    | path:04110_17 |
| lymphocytes | TP53 | 1.48E-05    | path:04110_19 |
| lymphocytes | TP53 | 0.001943417 | path:04110_20 |
| lymphocytes | TP53 | 7.56E-05    | path:04110_22 |
| lymphocytes | TP53 | 0.000198814 | path:04110_23 |
| lymphocytes | TP53 | 0.001943417 | path:04110_27 |
| lymphocytes | TP53 | 0.000210553 | path:04110_3  |
| lymphocytes | TP53 | 0.004511216 | path:04110_4  |
| lymphocytes | TP53 | 4.42E-09    | path:04110_7  |
| lymphocytes | TP53 | 0.004291125 | path:04110_8  |
| lymphocytes | TP53 | 0           | path:04115_1  |
| lymphocytes | TP53 | 0           | path:04115_2  |
| lymphocytes | TP53 | 0           | path:04115_3  |
| lymphocytes | TP53 | 0           | path:04115_4  |
| lymphocytes | TP53 | 0           | path:04115_7  |
| lymphocytes | TP53 | 0.000421718 | path:04210_20 |
| lymphocytes | TP53 | 0.000275763 | path:04210_23 |
| lymphocytes | TP53 | 0.000275763 | path:04210_24 |
| lymphocytes | TP53 | 0.009131774 | path:04510_10 |
| lymphocytes | TP53 | 0.004511216 | path:04510_15 |
| lymphocytes | TP53 | 0.002466645 | path:04510_16 |

|             |      |             |               |
|-------------|------|-------------|---------------|
| lymphocytes | TP53 | 0.000580605 | path:04510_17 |
| lymphocytes | TP53 | 0.001774645 | path:04510_18 |
| lymphocytes | TP53 | 0.006951959 | path:04510_25 |
| lymphocytes | TP53 | 0.006951959 | path:04510_5  |
| lymphocytes | TP53 | 0.009576653 | path:04510_6  |
| lymphocytes | TP53 | 0.001110697 | path:04510_7  |
| lymphocytes | TP53 | 0.00935253  | path:04510_8  |
| lymphocytes | TP53 | 0.009062653 | path:04621_7  |
| lymphocytes | TP53 | 0.000218217 | path:04722_19 |
| lymphocytes | TP53 | 0.002756828 | path:04912_8  |
| lymphocytes | TP53 | 0.009062653 | path:05014_4  |
| lymphocytes | TP53 | 0.007459365 | path:05160_12 |
| lymphocytes | TP53 | 0.009062653 | path:05160_15 |
| lymphocytes | TP53 | 0.000338058 | path:05200_10 |
| lymphocytes | TP53 | 0.000275763 | path:05200_11 |
| lymphocytes | TP53 | 0.000275763 | path:05200_12 |
| lymphocytes | TP53 | 0.000968321 | path:05200_15 |
| lymphocytes | TP53 | 0.00392722  | path:05200_17 |
| lymphocytes | TP53 | 0.002997803 | path:05200_19 |
| lymphocytes | TP53 | 0.00011707  | path:05200_20 |
| lymphocytes | TP53 | 0.000275763 | path:05200_4  |
| lymphocytes | TP53 | 7.56E-05    | path:05200_47 |
| lymphocytes | TP53 | 1.95E-05    | path:05200_48 |
| lymphocytes | TP53 | 0.000367024 | path:05200_5  |
| lymphocytes | TP53 | 0.000172314 | path:05200_51 |
| lymphocytes | TP53 | 1.95E-05    | path:05200_8  |
| lymphocytes | TP53 | 0.007459365 | path:05213_2  |
| lymphocytes | TP53 | 0.003580594 | path:05214_1  |
| lymphocytes | TP53 | 0.000210553 | path:05214_10 |
| lymphocytes | TP53 | 0.001774645 | path:05214_11 |
| lymphocytes | TP53 | 1.95E-05    | path:05214_12 |
| lymphocytes | TP53 | 0.00011707  | path:05214_13 |
| lymphocytes | TP53 | 7.56E-05    | path:05214_14 |
| lymphocytes | TP53 | 0.003580594 | path:05214_4  |

|             |       |             |               |
|-------------|-------|-------------|---------------|
| lymphocytes | TP53  | 0.004511216 | path:05215_10 |
| lymphocytes | TP53  | 0.000275763 | path:05215_11 |
| lymphocytes | TP53  | 0.00331496  | path:05215_3  |
| lymphocytes | TP53  | 0.002754132 | path:05218_2  |
| lymphocytes | TP53  | 0.001774645 | path:05218_5  |
| lymphocytes | TP53  | 1.95E-05    | path:05218_6  |
| lymphocytes | TP53  | 0.001385048 | path:05218_8  |
| lymphocytes | TP53  | 0.001691972 | path:05219_3  |
| lymphocytes | TP53  | 0.009062653 | path:05219_4  |
| lymphocytes | TP53  | 0.00011707  | path:05220_12 |
| lymphocytes | TP53  | 1.95E-05    | path:05220_8  |
| lymphocytes | TP53  | 7.56E-05    | path:05220_9  |
| macrophages | CEBPA | 0.0042174   | path:04060_54 |
| macrophages | CEBPA | 0.00918123  | path:04610_3  |
| macrophages | CEBPA | 0.00018207  | path:04610_4  |
| macrophages | CEBPA | 0.00018207  | path:04610_6  |
| macrophages | SPI1  | 0.00153244  | path:04060_41 |
| macrophages | SPI1  | 0.005348786 | path:04145_2  |
| macrophages | SPI1  | 3.11E-06    | path:04145_6  |
| macrophages | SPI1  | 0.007630608 | path:04514_55 |
| macrophages | SPI1  | 0.003570772 | path:04514_62 |
| macrophages | SPI1  | 0.008430928 | path:04650_10 |
| macrophages | SPI1  | 0.007340609 | path:04650_12 |
| macrophages | SPI1  | 0.003805584 | path:04650_13 |
| macrophages | SPI1  | 0.003570772 | path:04670_10 |
| macrophages | SPI1  | 0.00153244  | path:04670_14 |
| macrophages | SPI1  | 0.000961365 | path:04670_15 |
| macrophages | SPI1  | 0.000252274 | path:04670_2  |
| macrophages | SPI1  | 0.000110411 | path:05140_4  |
| macrophages | SPI1  | 0.005348786 | path:05150_17 |
| macrophages | SPI1  | 0.000902646 | path:05200_43 |
| MCF7        | E2F1  | 0.000197534 | path:04110_1  |
| MCF7        | E2F1  | 0.008121608 | path:04110_15 |
| MCF7        | E2F1  | 0.006872543 | path:04110_16 |

|      |      |             |               |
|------|------|-------------|---------------|
| MCF7 | E2F1 | 9.20E-09    | path:04110_17 |
| MCF7 | E2F1 | 1.74E-07    | path:04110_19 |
| MCF7 | E2F1 | 2.73E-06    | path:04110_20 |
| MCF7 | E2F1 | 0.000308684 | path:04110_22 |
| MCF7 | E2F1 | 1.13E-07    | path:04110_23 |
| MCF7 | E2F1 | 1.13E-07    | path:04110_26 |
| MCF7 | E2F1 | 2.73E-06    | path:04110_27 |
| MCF7 | E2F1 | 1.13E-07    | path:04110_3  |
| MCF7 | E2F1 | 1.13E-07    | path:04110_4  |
| MCF7 | E2F1 | 1.74E-05    | path:04110_7  |
| MCF7 | E2F1 | 0.00499983  | path:04115_1  |
| MCF7 | E2F1 | 0.009147152 | path:04510_11 |
| MCF7 | E2F1 | 0.004589831 | path:05014_4  |
| MCF7 | E2F1 | 1.56E-05    | path:05200_51 |
| MCF7 | E2F1 | 9.20E-09    | path:05200_52 |
| MCF7 | E2F1 | 1.85E-07    | path:05200_53 |
| MCF7 | E2F1 | 0.002554435 | path:05200_54 |
| MCF7 | E2F1 | 1.10E-07    | path:05212_13 |
| MCF7 | E2F1 | 1.07E-05    | path:05214_13 |
| MCF7 | E2F1 | 1.13E-07    | path:05214_15 |
| MCF7 | E2F1 | 1.07E-05    | path:05214_21 |
| MCF7 | E2F1 | 1.56E-05    | path:05215_7  |
| MCF7 | E2F1 | 1.13E-07    | path:05218_7  |
| MCF7 | E2F1 | 0.000197534 | path:05218_8  |
| MCF7 | E2F1 | 1.10E-07    | path:05219_4  |
| MCF7 | E2F1 | 1.13E-07    | path:05220_11 |
| MCF7 | E2F1 | 1.07E-05    | path:05220_12 |
| MCF7 | E2F1 | 3.73E-07    | path:05222_1  |
| MCF7 | E2F1 | 0.009147152 | path:05222_2  |
| MCF7 | E2F1 | 1.10E-07    | path:05223_3  |
| MCF7 | ESR1 | 0.005413618 | path:00830_2  |
| MCF7 | ESR1 | 0.000345486 | path:04115_1  |
| MCF7 | ESR1 | 0.002979325 | path:04115_2  |
| MCF7 | ESR1 | 0.002948202 | path:04115_3  |



|      |      |             |               |
|------|------|-------------|---------------|
| MCF7 | ESR1 | 0.002948202 | path:04115_4  |
| MCF7 | ESR1 | 0.002948202 | path:04115_7  |
| MCF7 | ESR1 | 0.002948202 | path:04610_8  |
| MCF7 | ESR1 | 0.000345486 | path:05200_29 |
| MCF7 | FOS  | 0.005719136 | path:04115_1  |
| MCF7 | FOS  | 0.006308233 | path:04310_7  |
| MCF7 | FOS  | 0.003173805 | path:04610_7  |
| MCF7 | FOS  | 0.006237239 | path:04620_17 |
| MCF7 | FOS  | 0.003173805 | path:04620_18 |
| MCF7 | FOS  | 0.006237239 | path:04620_22 |
| MCF7 | FOS  | 0.006237239 | path:04620_9  |
| MCF7 | FOS  | 2.16E-08    | path:05200_29 |
| MCF7 | NFIC | 0.004396514 | path:00591_1  |
| MCF7 | NFIC | 0.005988829 | path:00982_11 |
| MCF7 | NFIC | 0.00921451  | path:00982_2  |
| MCF7 | NFIC | 0.005988829 | path:00982_3  |
| MCF7 | NFIC | 0.00787147  | path:00982_4  |
| MCF7 | NFIC | 0.00787147  | path:00982_5  |
| MCF7 | NFIC | 0.004396514 | path:00982_7  |
| MCF7 | NFIC | 0.004396514 | path:00982_8  |
| MCF7 | NFIC | 0.00787147  | path:00982_9  |
| MCF7 | NFIC | 0.00787147  | path:04010_30 |
| MCF7 | NFIC | 0.00787147  | path:04010_31 |
| MCF7 | NFIC | 0.004396514 | path:04080_7  |
| MCF7 | NFIC | 0.008000492 | path:04115_1  |
| MCF7 | NFIC | 0.00787147  | path:04115_2  |
| MCF7 | NFIC | 0.00787147  | path:04115_3  |
| MCF7 | NFIC | 0.00787147  | path:04115_4  |
| MCF7 | NFIC | 0.00787147  | path:04115_7  |
| MCF7 | NFIC | 0.00787147  | path:04660_8  |
| MCF7 | NFIC | 0.00787147  | path:04662_6  |
| MCF7 | NFIC | 0.00787147  | path:04722_19 |
| MCF7 | NFIC | 0.00787147  | path:05160_15 |
| MCF7 | NFIC | 0.007050709 | path:05200_47 |

|      |      |             |               |
|------|------|-------------|---------------|
| MCF7 | NFIC | 0.004396514 | path:05200_48 |
| MCF7 | NFIC | 0.00787147  | path:05200_51 |
| MCF7 | NFIC | 0.004396514 | path:05214_12 |
| MCF7 | NFIC | 0.00787147  | path:05214_13 |
| MCF7 | NFIC | 0.007050709 | path:05214_14 |
| MCF7 | NFIC | 0.004396514 | path:05218_5  |
| MCF7 | NFIC | 0.004396514 | path:05218_6  |
| MCF7 | NFIC | 0.00787147  | path:05220_12 |
| MCF7 | NFIC | 0.004396514 | path:05220_8  |
| MCF7 | NFIC | 0.007050709 | path:05220_9  |
| MCF7 | SP1  | 0.006087664 | path:00120_1  |
| MCF7 | SP1  | 0.003885876 | path:00120_2  |
| MCF7 | SP1  | 0.003885876 | path:00120_3  |
| MCF7 | SP1  | 0.001893526 | path:00140_1  |
| MCF7 | SP1  | 1.44E-05    | path:00140_10 |
| MCF7 | SP1  | 0.001534931 | path:00140_11 |
| MCF7 | SP1  | 0.006087664 | path:00140_12 |
| MCF7 | SP1  | 2.77E-05    | path:00140_13 |
| MCF7 | SP1  | 0.003885876 | path:00140_14 |
| MCF7 | SP1  | 0.000245716 | path:00140_16 |
| MCF7 | SP1  | 0.000245716 | path:00140_18 |
| MCF7 | SP1  | 2.77E-05    | path:00140_19 |
| MCF7 | SP1  | 0.000441307 | path:00140_20 |
| MCF7 | SP1  | 0.001893526 | path:00140_25 |
| MCF7 | SP1  | 1.44E-05    | path:00140_3  |
| MCF7 | SP1  | 1.44E-05    | path:00140_4  |
| MCF7 | SP1  | 5.07E-05    | path:00140_5  |
| MCF7 | SP1  | 8.66E-05    | path:00140_6  |
| MCF7 | SP1  | 2.77E-05    | path:00140_7  |
| MCF7 | SP1  | 0.000123921 | path:00140_8  |
| MCF7 | SP1  | 0.000123921 | path:00140_9  |
| MCF7 | SP1  | 0.005536058 | path:00240_16 |
| MCF7 | SP1  | 0.003391309 | path:00240_17 |
| MCF7 | SP1  | 0.001690362 | path:00240_2  |

|      |     |             |               |
|------|-----|-------------|---------------|
| MCF7 | SP1 | 0.009002988 | path:00240_5  |
| MCF7 | SP1 | 0.005536058 | path:00330_1  |
| MCF7 | SP1 | 0.005126386 | path:00330_9  |
| MCF7 | SP1 | 0.006192277 | path:00350_2  |
| MCF7 | SP1 | 0.006192277 | path:00350_3  |
| MCF7 | SP1 | 0.001393247 | path:00980_2  |
| MCF7 | SP1 | 0.002175912 | path:00982_10 |
| MCF7 | SP1 | 0.003931316 | path:04010_10 |
| MCF7 | SP1 | 0.000441307 | path:04010_26 |
| MCF7 | SP1 | 0.000123921 | path:04010_5  |
| MCF7 | SP1 | 0.002149604 | path:04060_22 |
| MCF7 | SP1 | 0.001014956 | path:04060_32 |
| MCF7 | SP1 | 0.007433507 | path:04060_47 |
| MCF7 | SP1 | 0.00916136  | path:04110_1  |
| MCF7 | SP1 | 1.86E-10    | path:04110_17 |
| MCF7 | SP1 | 4.28E-11    | path:04110_18 |
| MCF7 | SP1 | 1.05E-10    | path:04110_19 |
| MCF7 | SP1 | 2.92E-09    | path:04110_20 |
| MCF7 | SP1 | 1.43E-05    | path:04110_22 |
| MCF7 | SP1 | 5.22E-09    | path:04110_23 |
| MCF7 | SP1 | 0.006192277 | path:04110_25 |
| MCF7 | SP1 | 7.70E-08    | path:04110_26 |
| MCF7 | SP1 | 2.92E-09    | path:04110_27 |
| MCF7 | SP1 | 6.46E-09    | path:04110_3  |
| MCF7 | SP1 | 6.46E-09    | path:04110_4  |
| MCF7 | SP1 | 4.97E-07    | path:04110_7  |
| MCF7 | SP1 | 3.47E-10    | path:04115_1  |
| MCF7 | SP1 | 6.74E-05    | path:04115_2  |
| MCF7 | SP1 | 4.23E-05    | path:04115_3  |
| MCF7 | SP1 | 6.18E-06    | path:04115_4  |
| MCF7 | SP1 | 4.96E-05    | path:04115_7  |
| MCF7 | SP1 | 7.61E-06    | path:04144_2  |
| MCF7 | SP1 | 0.002175912 | path:04210_20 |
| MCF7 | SP1 | 0.001107767 | path:04210_24 |

|      |     |             |               |
|------|-----|-------------|---------------|
| MCF7 | SP1 | 1.33E-05    | path:04310_6  |
| MCF7 | SP1 | 1.77E-05    | path:04310_7  |
| MCF7 | SP1 | 7.85E-13    | path:04510_1  |
| MCF7 | SP1 | 1.05E-10    | path:04510_10 |
| MCF7 | SP1 | 0.001603207 | path:04510_13 |
| MCF7 | SP1 | 0.001164758 | path:04510_15 |
| MCF7 | SP1 | 0.002771235 | path:04510_16 |
| MCF7 | SP1 | 0.000141426 | path:04510_17 |
| MCF7 | SP1 | 8.07E-08    | path:04510_18 |
| MCF7 | SP1 | 1.96E-12    | path:04510_19 |
| MCF7 | SP1 | 1.43E-05    | path:04510_20 |
| MCF7 | SP1 | 0.000718519 | path:04510_23 |
| MCF7 | SP1 | 0.002175912 | path:04510_24 |
| MCF7 | SP1 | 0.0024986   | path:04510_25 |
| MCF7 | SP1 | 6.74E-05    | path:04510_4  |
| MCF7 | SP1 | 0.0024986   | path:04510_5  |
| MCF7 | SP1 | 1.07E-10    | path:04510_6  |
| MCF7 | SP1 | 0.000448433 | path:04510_7  |
| MCF7 | SP1 | 6.16E-10    | path:04510_8  |
| MCF7 | SP1 | 2.01E-05    | path:04512_10 |
| MCF7 | SP1 | 5.55E-06    | path:04512_11 |
| MCF7 | SP1 | 1.66E-06    | path:04512_12 |
| MCF7 | SP1 | 7.86E-06    | path:04512_13 |
| MCF7 | SP1 | 0.000101569 | path:04512_14 |
| MCF7 | SP1 | 0.000245716 | path:04512_18 |
| MCF7 | SP1 | 0.000549822 | path:04512_19 |
| MCF7 | SP1 | 0.002149604 | path:04512_20 |
| MCF7 | SP1 | 0.008608739 | path:04512_22 |
| MCF7 | SP1 | 0.00016592  | path:04512_27 |
| MCF7 | SP1 | 1.66E-05    | path:04512_3  |
| MCF7 | SP1 | 2.72E-07    | path:04512_5  |
| MCF7 | SP1 | 6.24E-07    | path:04512_6  |
| MCF7 | SP1 | 9.36E-06    | path:04512_9  |
| MCF7 | SP1 | 0.005126386 | path:04520_3  |

|      |     |             |               |
|------|-----|-------------|---------------|
| MCF7 | SP1 | 0.001603207 | path:04520_5  |
| MCF7 | SP1 | 0.000412181 | path:04520_7  |
| MCF7 | SP1 | 1.22E-05    | path:04540_13 |
| MCF7 | SP1 | 9.21E-07    | path:04610_3  |
| MCF7 | SP1 | 5.55E-06    | path:04610_4  |
| MCF7 | SP1 | 9.21E-07    | path:04610_6  |
| MCF7 | SP1 | 0.000133832 | path:04610_7  |
| MCF7 | SP1 | 0.000203885 | path:04610_8  |
| MCF7 | SP1 | 0.000203885 | path:04620_18 |
| MCF7 | SP1 | 0.001893526 | path:04620_9  |
| MCF7 | SP1 | 0.000231547 | path:04630_1  |
| MCF7 | SP1 | 0.001390056 | path:04630_2  |
| MCF7 | SP1 | 1.97E-06    | path:04630_3  |
| MCF7 | SP1 | 5.95E-06    | path:04630_4  |
| MCF7 | SP1 | 4.84E-05    | path:04650_20 |
| MCF7 | SP1 | 0.008608739 | path:04650_7  |
| MCF7 | SP1 | 0.000718519 | path:04722_19 |
| MCF7 | SP1 | 7.92E-07    | path:04810_29 |
| MCF7 | SP1 | 1.33E-05    | path:04912_8  |
| MCF7 | SP1 | 0.007433507 | path:04940_4  |
| MCF7 | SP1 | 0.006087664 | path:05014_3  |
| MCF7 | SP1 | 0.008608739 | path:05014_4  |
| MCF7 | SP1 | 0.007433507 | path:05016_8  |
| MCF7 | SP1 | 0.001014956 | path:05100_3  |
| MCF7 | SP1 | 0.008608739 | path:05140_10 |
| MCF7 | SP1 | 0.000245716 | path:05140_6  |
| MCF7 | SP1 | 0.001107767 | path:05142_10 |
| MCF7 | SP1 | 0.003931316 | path:05142_11 |
| MCF7 | SP1 | 0.003885876 | path:05142_17 |
| MCF7 | SP1 | 0.003885876 | path:05142_18 |
| MCF7 | SP1 | 0.000441307 | path:05142_20 |
| MCF7 | SP1 | 0.000718519 | path:05142_21 |
| MCF7 | SP1 | 0.001107767 | path:05142_4  |
| MCF7 | SP1 | 0.006087664 | path:05145_19 |

|      |     |             |               |
|------|-----|-------------|---------------|
| MCF7 | SP1 | 0.001014956 | path:05145_21 |
| MCF7 | SP1 | 0.006087664 | path:05145_8  |
| MCF7 | SP1 | 1.23E-06    | path:05146_1  |
| MCF7 | SP1 | 7.92E-07    | path:05146_2  |
| MCF7 | SP1 | 0.002149604 | path:05146_5  |
| MCF7 | SP1 | 9.10E-07    | path:05146_9  |
| MCF7 | SP1 | 0.003935354 | path:05200_19 |
| MCF7 | SP1 | 0.003935354 | path:05200_20 |
| MCF7 | SP1 | 0.00927462  | path:05200_24 |
| MCF7 | SP1 | 9.21E-07    | path:05200_29 |
| MCF7 | SP1 | 2.01E-05    | path:05200_3  |
| MCF7 | SP1 | 0.000718519 | path:05200_31 |
| MCF7 | SP1 | 0.008608739 | path:05200_38 |
| MCF7 | SP1 | 0.000289957 | path:05200_4  |
| MCF7 | SP1 | 0.000718519 | path:05200_42 |
| MCF7 | SP1 | 2.07E-08    | path:05200_47 |
| MCF7 | SP1 | 1.33E-05    | path:05200_48 |
| MCF7 | SP1 | 5.07E-05    | path:05200_50 |
| MCF7 | SP1 | 5.54E-09    | path:05200_51 |
| MCF7 | SP1 | 1.55E-08    | path:05200_52 |
| MCF7 | SP1 | 4.11E-06    | path:05200_53 |
| MCF7 | SP1 | 0.001014956 | path:05200_56 |
| MCF7 | SP1 | 0.000441307 | path:05210_10 |
| MCF7 | SP1 | 0.000718519 | path:05210_12 |
| MCF7 | SP1 | 0.000718519 | path:05210_7  |
| MCF7 | SP1 | 1.44E-05    | path:05212_13 |
| MCF7 | SP1 | 0.008608739 | path:05212_14 |
| MCF7 | SP1 | 1.33E-05    | path:05214_12 |
| MCF7 | SP1 | 1.18E-07    | path:05214_13 |
| MCF7 | SP1 | 2.07E-08    | path:05214_14 |
| MCF7 | SP1 | 9.21E-07    | path:05214_15 |
| MCF7 | SP1 | 0.005536058 | path:05214_2  |
| MCF7 | SP1 | 0.000245716 | path:05214_21 |
| MCF7 | SP1 | 0.005536058 | path:05214_5  |

|      |        |             |               |
|------|--------|-------------|---------------|
| MCF7 | SP1    | 0.001164758 | path:05215_10 |
| MCF7 | SP1    | 0.008608739 | path:05215_7  |
| MCF7 | SP1    | 0.000441307 | path:05216_4  |
| MCF7 | SP1    | 0.000411461 | path:05218_4  |
| MCF7 | SP1    | 0.000133832 | path:05218_5  |
| MCF7 | SP1    | 1.33E-05    | path:05218_6  |
| MCF7 | SP1    | 9.21E-07    | path:05218_7  |
| MCF7 | SP1    | 7.27E-05    | path:05218_8  |
| MCF7 | SP1    | 0.000310459 | path:05219_3  |
| MCF7 | SP1    | 1.44E-05    | path:05219_4  |
| MCF7 | SP1    | 9.21E-07    | path:05220_11 |
| MCF7 | SP1    | 1.18E-07    | path:05220_12 |
| MCF7 | SP1    | 0.002149604 | path:05220_5  |
| MCF7 | SP1    | 1.33E-05    | path:05220_8  |
| MCF7 | SP1    | 2.07E-08    | path:05220_9  |
| MCF7 | SP1    | 0.006192277 | path:05221_1  |
| MCF7 | SP1    | 5.36E-07    | path:05222_1  |
| MCF7 | SP1    | 0.000133832 | path:05222_2  |
| MCF7 | SP1    | 2.01E-05    | path:05222_4  |
| MCF7 | SP1    | 0.001603207 | path:05222_7  |
| MCF7 | SP1    | 1.44E-05    | path:05223_3  |
| MCF7 | SP1    | 0.007433507 | path:05320_9  |
| MCF7 | SP1    | 0.007433507 | path:05330_5  |
| MCF7 | SP1    | 0.007433507 | path:05332_2  |
| MCF7 | SP1    | 0.007433507 | path:05332_5  |
| MCF7 | SP1    | 1.77E-05    | path:05414_2  |
| MCF7 | STAT3  | 0.007358355 | path:04060_3  |
| MCF7 | STAT3  | 0.008398489 | path:04060_8  |
| MCF7 | STAT3  | 0.00794491  | path:04630_2  |
| MCF7 | STAT3  | 0.00794491  | path:04630_3  |
| MCF7 | STAT3  | 5.36E-05    | path:04630_4  |
| MCF7 | STAT3  | 0.000767514 | path:05142_4  |
| MCF7 | STAT3  | 0.000108961 | path:05200_29 |
| MCF7 | TFAP2C | 0.009425324 | path:04520_9  |

|      |        |             |               |
|------|--------|-------------|---------------|
| MCF7 | TFAP2C | 0.00404499  | path:04912_8  |
| MCF7 | TFAP2C | 0.00404499  | path:05219_2  |
| MCF7 | TP53   | 0.007702858 | path:04010_15 |
| MCF7 | TP53   | 0.009062653 | path:04010_16 |
| MCF7 | TP53   | 0.007443002 | path:04010_21 |
| MCF7 | TP53   | 0.002466645 | path:04012_12 |
| MCF7 | TP53   | 2.55E-11    | path:04110_1  |
| MCF7 | TP53   | 3.28E-07    | path:04110_17 |
| MCF7 | TP53   | 1.48E-05    | path:04110_19 |
| MCF7 | TP53   | 0.001943417 | path:04110_20 |
| MCF7 | TP53   | 7.56E-05    | path:04110_22 |
| MCF7 | TP53   | 0.000198814 | path:04110_23 |
| MCF7 | TP53   | 0.001943417 | path:04110_27 |
| MCF7 | TP53   | 0.000210553 | path:04110_3  |
| MCF7 | TP53   | 0.004511216 | path:04110_4  |
| MCF7 | TP53   | 4.42E-09    | path:04110_7  |
| MCF7 | TP53   | 0.004291125 | path:04110_8  |
| MCF7 | TP53   | 0           | path:04115_1  |
| MCF7 | TP53   | 0           | path:04115_2  |
| MCF7 | TP53   | 0           | path:04115_3  |
| MCF7 | TP53   | 0           | path:04115_4  |
| MCF7 | TP53   | 0           | path:04115_7  |
| MCF7 | TP53   | 0.000421718 | path:04210_20 |
| MCF7 | TP53   | 0.000275763 | path:04210_23 |
| MCF7 | TP53   | 0.000275763 | path:04210_24 |
| MCF7 | TP53   | 0.009131774 | path:04510_10 |
| MCF7 | TP53   | 0.004511216 | path:04510_15 |
| MCF7 | TP53   | 0.002466645 | path:04510_16 |
| MCF7 | TP53   | 0.000580605 | path:04510_17 |
| MCF7 | TP53   | 0.001774645 | path:04510_18 |
| MCF7 | TP53   | 0.006951959 | path:04510_25 |
| MCF7 | TP53   | 0.006951959 | path:04510_5  |
| MCF7 | TP53   | 0.009576653 | path:04510_6  |
| MCF7 | TP53   | 0.001110697 | path:04510_7  |



|      |      |             |               |
|------|------|-------------|---------------|
| MCF7 | TP53 | 0.00935253  | path:04510_8  |
| MCF7 | TP53 | 0.009062653 | path:04621_7  |
| MCF7 | TP53 | 0.000218217 | path:04722_19 |
| MCF7 | TP53 | 0.002756828 | path:04912_8  |
| MCF7 | TP53 | 0.009062653 | path:05014_4  |
| MCF7 | TP53 | 0.007459365 | path:05160_12 |
| MCF7 | TP53 | 0.009062653 | path:05160_15 |
| MCF7 | TP53 | 0.000338058 | path:05200_10 |
| MCF7 | TP53 | 0.000275763 | path:05200_11 |
| MCF7 | TP53 | 0.000275763 | path:05200_12 |
| MCF7 | TP53 | 0.000968321 | path:05200_15 |
| MCF7 | TP53 | 0.00392722  | path:05200_17 |
| MCF7 | TP53 | 0.002997803 | path:05200_19 |
| MCF7 | TP53 | 0.00011707  | path:05200_20 |
| MCF7 | TP53 | 0.000275763 | path:05200_4  |
| MCF7 | TP53 | 7.56E-05    | path:05200_47 |
| MCF7 | TP53 | 1.95E-05    | path:05200_48 |
| MCF7 | TP53 | 0.000367024 | path:05200_5  |
| MCF7 | TP53 | 0.000172314 | path:05200_51 |
| MCF7 | TP53 | 1.95E-05    | path:05200_8  |
| MCF7 | TP53 | 0.007459365 | path:05213_2  |
| MCF7 | TP53 | 0.003580594 | path:05214_1  |
| MCF7 | TP53 | 0.000210553 | path:05214_10 |
| MCF7 | TP53 | 0.001774645 | path:05214_11 |
| MCF7 | TP53 | 1.95E-05    | path:05214_12 |
| MCF7 | TP53 | 0.00011707  | path:05214_13 |
| MCF7 | TP53 | 7.56E-05    | path:05214_14 |
| MCF7 | TP53 | 0.003580594 | path:05214_4  |
| MCF7 | TP53 | 0.004511216 | path:05215_10 |
| MCF7 | TP53 | 0.000275763 | path:05215_11 |
| MCF7 | TP53 | 0.00331496  | path:05215_3  |
| MCF7 | TP53 | 0.002754132 | path:05218_2  |
| MCF7 | TP53 | 0.001774645 | path:05218_5  |
| MCF7 | TP53 | 1.95E-05    | path:05218_6  |

|      |      |             |               |
|------|------|-------------|---------------|
| MCF7 | TP53 | 0.001385048 | path:05218_8  |
| MCF7 | TP53 | 0.001691972 | path:05219_3  |
| MCF7 | TP53 | 0.009062653 | path:05219_4  |
| MCF7 | TP53 | 0.00011707  | path:05220_12 |
| MCF7 | TP53 | 1.95E-05    | path:05220_8  |
| MCF7 | TP53 | 7.56E-05    | path:05220_9  |
| MCF7 | VDR  | 0.009786942 | path:00140_1  |
| MCF7 | VDR  | 0.008771608 | path:00140_11 |
| MCF7 | VDR  | 0.009786942 | path:00140_25 |
| MCF7 | VDR  | 0.009786942 | path:00140_26 |
| MCF7 | VDR  | 0.008771608 | path:00591_1  |
| MCF7 | VDR  | 0.00973729  | path:00980_2  |
| MCF7 | VDR  | 0.004788204 | path:00982_10 |
| MCF7 | VDR  | 0.001635842 | path:00982_11 |
| MCF7 | VDR  | 0.003675018 | path:00982_2  |
| MCF7 | VDR  | 0.001635842 | path:00982_3  |
| MCF7 | VDR  | 0.003361044 | path:00982_4  |
| MCF7 | VDR  | 0.003361044 | path:00982_5  |
| MCF7 | VDR  | 0.008771608 | path:00982_6  |
| MCF7 | VDR  | 0.001635842 | path:00982_7  |
| MCF7 | VDR  | 0.001635842 | path:00982_8  |
| MCF7 | VDR  | 0.003361044 | path:00982_9  |
| MCF7 | VDR  | 0.008771608 | path:04012_1  |
| MCF7 | VDR  | 0.008771608 | path:04012_11 |
| MCF7 | VDR  | 0.008771608 | path:04012_12 |
| MCF7 | VDR  | 0.0090937   | path:04012_14 |
| MCF7 | VDR  | 0.008771608 | path:04012_4  |
| MCF7 | VDR  | 0.008771608 | path:04012_7  |
| MCF7 | VDR  | 0.008771608 | path:05200_9  |
| MCF7 | VDR  | 0.008771608 | path:05214_1  |
| MCF7 | VDR  | 0.009415594 | path:05214_10 |
| MCF7 | VDR  | 0.008771608 | path:05214_17 |
| MCF7 | VDR  | 0.008771608 | path:05214_2  |
| MCF7 | VDR  | 0.008771608 | path:05214_3  |

|            |      |             |               |
|------------|------|-------------|---------------|
| MCF7       | VDR  | 0.008771608 | path:05214_4  |
| MCF7       | VDR  | 0.008771608 | path:05214_5  |
| MCF7       | VDR  | 0.008771608 | path:05214_6  |
| MCF7       | VDR  | 0.008771608 | path:05214_8  |
| MCF7       | VDR  | 0.009786942 | path:05215_11 |
| MCF7       | VDR  | 0.008771608 | path:05218_2  |
| MCF7       | VDR  | 0.008771608 | path:05223_6  |
| MDA-MB-231 | E2F1 | 0.000197534 | path:04110_1  |
| MDA-MB-231 | E2F1 | 0.008121608 | path:04110_15 |
| MDA-MB-231 | E2F1 | 0.006872543 | path:04110_16 |
| MDA-MB-231 | E2F1 | 9.20E-09    | path:04110_17 |
| MDA-MB-231 | E2F1 | 1.74E-07    | path:04110_19 |
| MDA-MB-231 | E2F1 | 2.73E-06    | path:04110_20 |
| MDA-MB-231 | E2F1 | 0.000308684 | path:04110_22 |
| MDA-MB-231 | E2F1 | 1.13E-07    | path:04110_23 |
| MDA-MB-231 | E2F1 | 1.13E-07    | path:04110_26 |
| MDA-MB-231 | E2F1 | 2.73E-06    | path:04110_27 |
| MDA-MB-231 | E2F1 | 1.13E-07    | path:04110_3  |
| MDA-MB-231 | E2F1 | 1.13E-07    | path:04110_4  |
| MDA-MB-231 | E2F1 | 1.74E-05    | path:04110_7  |
| MDA-MB-231 | E2F1 | 0.00499983  | path:04115_1  |
| MDA-MB-231 | E2F1 | 0.009147152 | path:04510_11 |
| MDA-MB-231 | E2F1 | 0.004589831 | path:05014_4  |
| MDA-MB-231 | E2F1 | 1.56E-05    | path:05200_51 |
| MDA-MB-231 | E2F1 | 9.20E-09    | path:05200_52 |
| MDA-MB-231 | E2F1 | 1.85E-07    | path:05200_53 |
| MDA-MB-231 | E2F1 | 0.002554435 | path:05200_54 |
| MDA-MB-231 | E2F1 | 1.10E-07    | path:05212_13 |
| MDA-MB-231 | E2F1 | 1.07E-05    | path:05214_13 |
| MDA-MB-231 | E2F1 | 1.13E-07    | path:05214_15 |
| MDA-MB-231 | E2F1 | 1.07E-05    | path:05214_21 |
| MDA-MB-231 | E2F1 | 1.56E-05    | path:05215_7  |
| MDA-MB-231 | E2F1 | 1.13E-07    | path:05218_7  |
| MDA-MB-231 | E2F1 | 0.000197534 | path:05218_8  |

|            |       |             |               |
|------------|-------|-------------|---------------|
| MDA-MB-231 | E2F1  | 1.10E-07    | path:05219_4  |
| MDA-MB-231 | E2F1  | 1.13E-07    | path:05220_11 |
| MDA-MB-231 | E2F1  | 1.07E-05    | path:05220_12 |
| MDA-MB-231 | E2F1  | 3.73E-07    | path:05222_1  |
| MDA-MB-231 | E2F1  | 0.009147152 | path:05222_2  |
| MDA-MB-231 | E2F1  | 1.10E-07    | path:05223_3  |
| MDA-MB-231 | STAT3 | 0.007358355 | path:04060_3  |
| MDA-MB-231 | STAT3 | 0.008398489 | path:04060_8  |
| MDA-MB-231 | STAT3 | 0.00794491  | path:04630_2  |
| MDA-MB-231 | STAT3 | 0.00794491  | path:04630_3  |
| MDA-MB-231 | STAT3 | 5.36E-05    | path:04630_4  |
| MDA-MB-231 | STAT3 | 0.000767514 | path:05142_4  |
| MDA-MB-231 | STAT3 | 0.000108961 | path:05200_29 |
| MDA-MB-468 | E2F1  | 0.000197534 | path:04110_1  |
| MDA-MB-468 | E2F1  | 0.008121608 | path:04110_15 |
| MDA-MB-468 | E2F1  | 0.006872543 | path:04110_16 |
| MDA-MB-468 | E2F1  | 9.20E-09    | path:04110_17 |
| MDA-MB-468 | E2F1  | 1.74E-07    | path:04110_19 |
| MDA-MB-468 | E2F1  | 2.73E-06    | path:04110_20 |
| MDA-MB-468 | E2F1  | 0.000308684 | path:04110_22 |
| MDA-MB-468 | E2F1  | 1.13E-07    | path:04110_23 |
| MDA-MB-468 | E2F1  | 1.13E-07    | path:04110_26 |
| MDA-MB-468 | E2F1  | 2.73E-06    | path:04110_27 |
| MDA-MB-468 | E2F1  | 1.13E-07    | path:04110_3  |
| MDA-MB-468 | E2F1  | 1.13E-07    | path:04110_4  |
| MDA-MB-468 | E2F1  | 1.74E-05    | path:04110_7  |
| MDA-MB-468 | E2F1  | 0.00499983  | path:04115_1  |
| MDA-MB-468 | E2F1  | 0.009147152 | path:04510_11 |
| MDA-MB-468 | E2F1  | 0.004589831 | path:05014_4  |
| MDA-MB-468 | E2F1  | 1.56E-05    | path:05200_51 |
| MDA-MB-468 | E2F1  | 9.20E-09    | path:05200_52 |
| MDA-MB-468 | E2F1  | 1.85E-07    | path:05200_53 |
| MDA-MB-468 | E2F1  | 0.002554435 | path:05200_54 |
| MDA-MB-468 | E2F1  | 1.10E-07    | path:05212_13 |

|            |       |             |               |
|------------|-------|-------------|---------------|
| MDA-MB-468 | E2F1  | 1.07E-05    | path:05214_13 |
| MDA-MB-468 | E2F1  | 1.13E-07    | path:05214_15 |
| MDA-MB-468 | E2F1  | 1.07E-05    | path:05214_21 |
| MDA-MB-468 | E2F1  | 1.56E-05    | path:05215_7  |
| MDA-MB-468 | E2F1  | 1.13E-07    | path:05218_7  |
| MDA-MB-468 | E2F1  | 0.000197534 | path:05218_8  |
| MDA-MB-468 | E2F1  | 1.10E-07    | path:05219_4  |
| MDA-MB-468 | E2F1  | 1.13E-07    | path:05220_11 |
| MDA-MB-468 | E2F1  | 1.07E-05    | path:05220_12 |
| MDA-MB-468 | E2F1  | 3.73E-07    | path:05222_1  |
| MDA-MB-468 | E2F1  | 0.009147152 | path:05222_2  |
| MDA-MB-468 | E2F1  | 1.10E-07    | path:05223_3  |
| MDA-MB-468 | STAT3 | 0.007358355 | path:04060_3  |
| MDA-MB-468 | STAT3 | 0.008398489 | path:04060_8  |
| MDA-MB-468 | STAT3 | 0.00794491  | path:04630_2  |
| MDA-MB-468 | STAT3 | 0.00794491  | path:04630_3  |
| MDA-MB-468 | STAT3 | 5.36E-05    | path:04630_4  |
| MDA-MB-468 | STAT3 | 0.000767514 | path:05142_4  |
| MDA-MB-468 | STAT3 | 0.000108961 | path:05200_29 |
| muscle     | NR1H3 | 0.000186607 | path:00830_2  |
| muscle     | NR1H3 | 0.006275482 | path:00980_1  |
| muscle     | NR1H3 | 0.000535628 | path:00982_4  |
| muscle     | NR1H3 | 0.000535628 | path:00982_5  |
| muscle     | NR1H3 | 0.000535628 | path:00982_9  |
| muscle     | NR4A1 | 0.00077713  | path:00140_10 |
| muscle     | NR4A1 | 6.42E-06    | path:00140_13 |
| muscle     | NR4A1 | 0.00077713  | path:00140_14 |
| muscle     | NR4A1 | 0.00077713  | path:00140_16 |
| muscle     | NR4A1 | 0.00077713  | path:00140_18 |
| muscle     | NR4A1 | 0.000832486 | path:00140_19 |
| muscle     | NR4A1 | 0.00077713  | path:00140_20 |
| muscle     | NR4A1 | 0.00077713  | path:00140_3  |
| muscle     | NR4A1 | 0.00077713  | path:00140_4  |
| muscle     | NR4A1 | 0.000960385 | path:00140_5  |

|               |        |             |               |
|---------------|--------|-------------|---------------|
| muscle        | NR4A1  | 0.001089761 | path:00140_6  |
| muscle        | NR4A1  | 0.000832486 | path:00140_7  |
| muscle        | NR4A1  | 0.00077713  | path:00140_8  |
| muscle        | NR4A1  | 0.00077713  | path:00140_9  |
| muscle        | SREBF1 | 0.009882974 | path:00100_9  |
| muscle        | SREBF1 | 0.009882974 | path:03320_2  |
| muscle        | SREBF1 | 3.27E-05    | path:04910_5  |
| muscle        | SREBF1 | 0.00143191  | path:04910_6  |
| neuroblastoma | GATA3  | 0.003994597 | path:04612_4  |
| neuroblastoma | TP73   | 6.75E-05    | path:04115_1  |
| neuroblastoma | TP73   | 6.67E-05    | path:04115_2  |
| neuroblastoma | TP73   | 6.67E-05    | path:04115_3  |
| neuroblastoma | TP73   | 6.67E-05    | path:04115_4  |
| neuroblastoma | TP73   | 6.67E-05    | path:04115_7  |
| neuroblastoma | TP73   | 0.000595015 | path:04722_19 |
| ovary         | AKNA   | 6.20E-07    | path:04060_31 |
| ovary         | AKNA   | 6.20E-07    | path:04514_10 |
| ovary         | AKNA   | 6.20E-07    | path:04514_11 |
| ovary         | AKNA   | 6.20E-07    | path:04514_12 |
| ovary         | AKNA   | 6.20E-07    | path:04514_78 |
| ovary         | AKNA   | 6.20E-07    | path:04514_9  |
| ovary         | AKNA   | 6.20E-07    | path:04672_2  |
| ovary         | AKNA   | 6.20E-07    | path:05144_9  |
| ovary         | AKNA   | 6.20E-07    | path:05145_20 |
| ovary         | AKNA   | 6.20E-07    | path:05310_2  |
| ovary         | AKNA   | 6.20E-07    | path:05320_2  |
| ovary         | AKNA   | 6.20E-07    | path:05320_5  |
| ovary         | AKNA   | 6.20E-07    | path:05322_7  |
| ovary         | AKNA   | 6.20E-07    | path:05330_12 |
| ovary         | AKNA   | 6.20E-07    | path:05330_3  |
| ovary         | AKNA   | 6.20E-07    | path:05416_3  |
| pancreas      | ELF1   | 8.41E-06    | path:04060_8  |
| pancreas      | ELF1   | 0.006320724 | path:04650_1  |
| pancreas      | ELF1   | 0.001225713 | path:04650_14 |

|          |       |             |               |
|----------|-------|-------------|---------------|
| pancreas | ELF1  | 0.000687264 | path:04650_15 |
| pancreas | ELF1  | 0.000687264 | path:04664_1  |
| pancreas | ELF1  | 0.000533253 | path:04664_10 |
| pancreas | ELF1  | 1.05E-05    | path:04664_2  |
| pancreas | ELF1  | 0.000533253 | path:04664_3  |
| pancreas | ELF1  | 0.000533253 | path:04664_5  |
| pancreas | ELF1  | 0.000533253 | path:04664_9  |
| pancreas | ELF1  | 0.006320724 | path:05142_21 |
| pancreas | ELF1  | 0.000687264 | path:05310_4  |
| pancreas | ELF1  | 0.000687264 | path:05310_5  |
| pancreas | FOXA3 | 0.000327469 | path:00140_1  |
| pancreas | FOXA3 | 0.000188543 | path:00140_11 |
| pancreas | FOXA3 | 0.000502586 | path:00140_12 |
| pancreas | FOXA3 | 0.000327469 | path:00140_25 |
| pancreas | FOXA3 | 0.000327469 | path:00140_26 |
| pancreas | FOXA3 | 0.000312584 | path:00591_1  |
| pancreas | FOXA3 | 0.000975791 | path:00830_2  |
| pancreas | FOXA3 | 0.000327469 | path:00980_2  |
| pancreas | FOXA3 | 7.28E-05    | path:00982_10 |
| pancreas | FOXA3 | 2.48E-05    | path:00982_11 |
| pancreas | FOXA3 | 5.58E-05    | path:00982_2  |
| pancreas | FOXA3 | 2.48E-05    | path:00982_3  |
| pancreas | FOXA3 | 5.10E-05    | path:00982_4  |
| pancreas | FOXA3 | 5.10E-05    | path:00982_5  |
| pancreas | FOXA3 | 0.000248984 | path:00982_6  |
| pancreas | FOXA3 | 2.48E-05    | path:00982_7  |
| pancreas | FOXA3 | 2.48E-05    | path:00982_8  |
| pancreas | FOXA3 | 5.10E-05    | path:00982_9  |
| pancreas | HNF4A | 0.00730316  | path:00120_15 |
| pancreas | HNF4A | 0.003812707 | path:00120_19 |
| pancreas | HNF4A | 0.001698537 | path:00120_6  |
| pancreas | HNF4A | 0.003812707 | path:00120_7  |
| pancreas | HNF4A | 0.000100826 | path:00120_9  |
| pancreas | HNF4A | 0.001808381 | path:00590_1  |

|                  |       |             |               |
|------------------|-------|-------------|---------------|
| pancreas         | HNF4A | 0.001722691 | path:00590_2  |
| pancreas         | HNF4A | 0.001722691 | path:00590_3  |
| pancreas         | HNF4A | 0.001898001 | path:00590_4  |
| pancreas         | HNF4A | 0.000515682 | path:00591_1  |
| pancreas         | HNF4A | 2.36E-05    | path:00830_2  |
| pancreas         | HNF4A | 0.000733563 | path:00980_2  |
| pancreas         | HNF4A | 2.52E-07    | path:00982_10 |
| pancreas         | HNF4A | 5.38E-08    | path:00982_4  |
| pancreas         | HNF4A | 5.38E-08    | path:00982_5  |
| pancreas         | HNF4A | 5.38E-08    | path:00982_9  |
| pancreas         | HNF4A | 0.001131883 | path:03320_1  |
| pancreas         | HNF4A | 0.000100826 | path:03320_2  |
| pancreas         | HNF4A | 4.35E-06    | path:04610_2  |
| pancreas         | HNF4A | 4.35E-06    | path:04610_3  |
| pancreas         | HNF4A | 0.000100826 | path:04610_4  |
| pancreas         | HNF4A | 6.69E-06    | path:04610_5  |
| pancreas         | HNF4A | 0.000179282 | path:04610_6  |
| pancreas         | HNF4A | 0.001698537 | path:04610_8  |
| pancreas         | HNF4A | 0.000287791 | path:04950_4  |
| peripheral blood | AKNA  | 6.20E-07    | path:04060_31 |
| peripheral blood | AKNA  | 6.20E-07    | path:04514_10 |
| peripheral blood | AKNA  | 6.20E-07    | path:04514_11 |
| peripheral blood | AKNA  | 6.20E-07    | path:04514_12 |
| peripheral blood | AKNA  | 6.20E-07    | path:04514_78 |
| peripheral blood | AKNA  | 6.20E-07    | path:04514_9  |
| peripheral blood | AKNA  | 6.20E-07    | path:04672_2  |
| peripheral blood | AKNA  | 6.20E-07    | path:05144_9  |
| peripheral blood | AKNA  | 6.20E-07    | path:05145_20 |
| peripheral blood | AKNA  | 6.20E-07    | path:05310_2  |
| peripheral blood | AKNA  | 6.20E-07    | path:05320_2  |
| peripheral blood | AKNA  | 6.20E-07    | path:05320_5  |
| peripheral blood | AKNA  | 6.20E-07    | path:05322_7  |
| peripheral blood | AKNA  | 6.20E-07    | path:05330_12 |
| peripheral blood | AKNA  | 6.20E-07    | path:05330_3  |



|                  |        |             |               |
|------------------|--------|-------------|---------------|
| peripheral blood | AKNA   | 6.20E-07    | path:05416_3  |
| peripheral blood | IRF5   | 0.005011517 | path:04060_38 |
| peripheral blood | IRF5   | 0.005011517 | path:04620_11 |
| peripheral blood | IRF5   | 0.005011517 | path:04620_2  |
| peripheral blood | IRF5   | 0.005011517 | path:04650_6  |
| peripheral blood | IRF5   | 0.005011517 | path:05160_6  |
| peripheral blood | IRF7   | 5.44E-05    | path:04060_38 |
| peripheral blood | IRF7   | 3.65E-07    | path:04620_11 |
| peripheral blood | IRF7   | 1.24E-05    | path:04620_12 |
| peripheral blood | IRF7   | 0.005131788 | path:04620_14 |
| peripheral blood | IRF7   | 0.005500251 | path:04620_16 |
| peripheral blood | IRF7   | 0.009380523 | path:04620_17 |
| peripheral blood | IRF7   | 0.005305274 | path:04620_18 |
| peripheral blood | IRF7   | 3.65E-07    | path:04620_2  |
| peripheral blood | IRF7   | 0.009380523 | path:04620_22 |
| peripheral blood | IRF7   | 0.009501335 | path:04620_9  |
| peripheral blood | IRF7   | 5.75E-05    | path:04650_6  |
| peripheral blood | IRF7   | 5.75E-05    | path:05160_6  |
| placenta         | KLF5   | 0.000357162 | path:05200_31 |
| placenta         | KLF5   | 0.000357162 | path:05210_12 |
| placenta         | KLF5   | 0.000357162 | path:05210_7  |
| placenta         | SREBF1 | 0.009882974 | path:00100_9  |
| placenta         | SREBF1 | 0.009882974 | path:03320_2  |
| placenta         | SREBF1 | 3.27E-05    | path:04910_5  |
| placenta         | SREBF1 | 0.00143191  | path:04910_6  |
| placenta         | TP63   | 2.23E-05    | path:04110_1  |
| placenta         | TP63   | 8.12E-05    | path:04110_7  |
| placenta         | TP63   | 8.12E-05    | path:04115_1  |
| placenta         | TP63   | 8.12E-05    | path:04115_2  |
| placenta         | TP63   | 8.12E-05    | path:04115_3  |
| placenta         | TP63   | 8.12E-05    | path:04115_4  |
| placenta         | TP63   | 8.12E-05    | path:04115_7  |
| placenta         | TP63   | 0.003115907 | path:05200_17 |
| placenta         | TP63   | 0.002783081 | path:05200_19 |

|          |      |             |               |
|----------|------|-------------|---------------|
| placenta | TP63 | 0.002783081 | path:05200_20 |
| placenta | TP63 | 0.000159403 | path:05200_47 |
| placenta | TP63 | 8.12E-05    | path:05200_48 |
| placenta | TP63 | 8.12E-05    | path:05214_12 |
| placenta | TP63 | 0.000159403 | path:05214_14 |
| placenta | TP63 | 0.004120782 | path:05215_11 |
| placenta | TP63 | 0.002837304 | path:05215_3  |
| placenta | TP63 | 8.12E-05    | path:05218_6  |
| placenta | TP63 | 8.12E-05    | path:05220_8  |
| placenta | TP63 | 0.000159403 | path:05220_9  |
| PMA      | EGR1 | 0.009869535 | path:04060_8  |
| PMA      | EGR1 | 0.00069989  | path:04510_10 |
| PMA      | EGR1 | 0.00069989  | path:04510_18 |
| PMA      | EGR1 | 0.003153788 | path:04510_6  |
| PMA      | EGR1 | 0.003153788 | path:04510_8  |
| PMA      | EGR1 | 0.00129686  | path:04512_3  |
| PMA      | EGR1 | 0.003153788 | path:04540_13 |
| PMA      | EGR1 | 0.003153788 | path:05146_9  |
| PMA      | EGR1 | 0.007008495 | path:05212_11 |
| PMA      | EGR1 | 0.008365691 | path:05212_12 |
| PMA      | EGR1 | 0.003153788 | path:05218_4  |
| PMA      | FOS  | 0.005719136 | path:04115_1  |
| PMA      | FOS  | 0.006308233 | path:04310_7  |
| PMA      | FOS  | 0.003173805 | path:04610_7  |
| PMA      | FOS  | 0.006237239 | path:04620_17 |
| PMA      | FOS  | 0.003173805 | path:04620_18 |
| PMA      | FOS  | 0.006237239 | path:04620_22 |
| PMA      | FOS  | 0.006237239 | path:04620_9  |
| PMA      | FOS  | 2.16E-08    | path:05200_29 |
| PMA      | RELA | 0.000137451 | path:04060_62 |
| PMA      | RELA | 2.04E-07    | path:04062_1  |
| PMA      | RELA | 3.87E-08    | path:04062_2  |
| PMA      | RELA | 0.001869278 | path:04110_17 |
| PMA      | RELA | 0.001781655 | path:04110_19 |

|          |       |             |               |
|----------|-------|-------------|---------------|
| PMA      | RELA  | 0.001869278 | path:04110_7  |
| PMA      | RELA  | 0.0005539   | path:04115_1  |
| PMA      | RELA  | 2.11E-06    | path:04620_1  |
| PMA      | RELA  | 4.80E-09    | path:04620_12 |
| PMA      | RELA  | 1.51E-07    | path:04620_13 |
| PMA      | RELA  | 2.07E-07    | path:04620_14 |
| PMA      | RELA  | 1.03E-08    | path:04620_16 |
| PMA      | RELA  | 6.51E-08    | path:04620_17 |
| PMA      | RELA  | 8.85E-09    | path:04620_18 |
| PMA      | RELA  | 6.51E-08    | path:04620_22 |
| PMA      | RELA  | 7.78E-08    | path:04620_9  |
| PMA      | RELA  | 0.00197363  | path:04650_22 |
| PMA      | RELA  | 0.001781655 | path:04650_23 |
| prostate | HNF1A | 0.008512637 | path:00120_5  |
| prostate | HNF1A | 0.008512637 | path:00140_1  |
| prostate | HNF1A | 3.95E-05    | path:00140_12 |
| prostate | HNF1A | 0.008512637 | path:00140_22 |
| prostate | HNF1A | 0.008512637 | path:00140_23 |
| prostate | HNF1A | 0.008512637 | path:00140_24 |
| prostate | HNF1A | 0.008512637 | path:00140_25 |
| prostate | HNF1A | 0.008512637 | path:00140_26 |
| prostate | HNF1A | 0.008512637 | path:00982_6  |
| prostate | HNF1A | 0.008512637 | path:04610_6  |
| prostate | TP63  | 2.23E-05    | path:04110_1  |
| prostate | TP63  | 8.12E-05    | path:04110_7  |
| prostate | TP63  | 8.12E-05    | path:04115_1  |
| prostate | TP63  | 8.12E-05    | path:04115_2  |
| prostate | TP63  | 8.12E-05    | path:04115_3  |
| prostate | TP63  | 8.12E-05    | path:04115_4  |
| prostate | TP63  | 8.12E-05    | path:04115_7  |
| prostate | TP63  | 0.003115907 | path:05200_17 |
| prostate | TP63  | 0.002783081 | path:05200_19 |
| prostate | TP63  | 0.002783081 | path:05200_20 |
| prostate | TP63  | 0.000159403 | path:05200_47 |

|                 |       |             |               |
|-----------------|-------|-------------|---------------|
| prostate        | TP63  | 8.12E-05    | path:05200_48 |
| prostate        | TP63  | 8.12E-05    | path:05214_12 |
| prostate        | TP63  | 0.000159403 | path:05214_14 |
| prostate        | TP63  | 0.004120782 | path:05215_11 |
| prostate        | TP63  | 0.002837304 | path:05215_3  |
| prostate        | TP63  | 8.12E-05    | path:05218_6  |
| prostate        | TP63  | 8.12E-05    | path:05220_8  |
| prostate        | TP63  | 0.000159403 | path:05220_9  |
| small intestine | HNF4A | 0.00730316  | path:00120_15 |
| small intestine | HNF4A | 0.003812707 | path:00120_19 |
| small intestine | HNF4A | 0.001698537 | path:00120_6  |
| small intestine | HNF4A | 0.003812707 | path:00120_7  |
| small intestine | HNF4A | 0.000100826 | path:00120_9  |
| small intestine | HNF4A | 0.001808381 | path:00590_1  |
| small intestine | HNF4A | 0.001722691 | path:00590_2  |
| small intestine | HNF4A | 0.001722691 | path:00590_3  |
| small intestine | HNF4A | 0.001898001 | path:00590_4  |
| small intestine | HNF4A | 0.000515682 | path:00591_1  |
| small intestine | HNF4A | 2.36E-05    | path:00830_2  |
| small intestine | HNF4A | 0.000733563 | path:00980_2  |
| small intestine | HNF4A | 2.52E-07    | path:00982_10 |
| small intestine | HNF4A | 5.38E-08    | path:00982_4  |
| small intestine | HNF4A | 5.38E-08    | path:00982_5  |
| small intestine | HNF4A | 5.38E-08    | path:00982_9  |
| small intestine | HNF4A | 0.001131883 | path:03320_1  |
| small intestine | HNF4A | 0.000100826 | path:03320_2  |
| small intestine | HNF4A | 4.35E-06    | path:04610_2  |
| small intestine | HNF4A | 4.35E-06    | path:04610_3  |
| small intestine | HNF4A | 0.000100826 | path:04610_4  |
| small intestine | HNF4A | 6.69E-06    | path:04610_5  |
| small intestine | HNF4A | 0.000179282 | path:04610_6  |
| small intestine | HNF4A | 0.001698537 | path:04610_8  |
| small intestine | HNF4A | 0.000287791 | path:04950_4  |
| small intestine | NR1I2 | 0.004391058 | path:00830_2  |

|                 |       |             |               |
|-----------------|-------|-------------|---------------|
| small intestine | NR112 | 0.00011908  | path:00982_4  |
| small intestine | NR112 | 0.00011908  | path:00982_5  |
| small intestine | NR112 | 0.00011908  | path:00982_9  |
| spleen          | AKNA  | 6.20E-07    | path:04060_31 |
| spleen          | AKNA  | 6.20E-07    | path:04514_10 |
| spleen          | AKNA  | 6.20E-07    | path:04514_11 |
| spleen          | AKNA  | 6.20E-07    | path:04514_12 |
| spleen          | AKNA  | 6.20E-07    | path:04514_78 |
| spleen          | AKNA  | 6.20E-07    | path:04514_9  |
| spleen          | AKNA  | 6.20E-07    | path:04672_2  |
| spleen          | AKNA  | 6.20E-07    | path:05144_9  |
| spleen          | AKNA  | 6.20E-07    | path:05145_20 |
| spleen          | AKNA  | 6.20E-07    | path:05310_2  |
| spleen          | AKNA  | 6.20E-07    | path:05320_2  |
| spleen          | AKNA  | 6.20E-07    | path:05320_5  |
| spleen          | AKNA  | 6.20E-07    | path:05322_7  |
| spleen          | AKNA  | 6.20E-07    | path:05330_12 |
| spleen          | AKNA  | 6.20E-07    | path:05330_3  |
| spleen          | AKNA  | 6.20E-07    | path:05416_3  |
| spleen          | CREB1 | 0.004288489 | path:04514_1  |
| spleen          | CREB1 | 0.004288489 | path:04514_3  |
| spleen          | CREB1 | 0.004288489 | path:04612_3  |
| spleen          | CREB1 | 0.004131401 | path:04620_12 |
| spleen          | CREB1 | 0.004131401 | path:04620_16 |
| spleen          | CREB1 | 0.001277819 | path:04620_17 |
| spleen          | CREB1 | 0.000627719 | path:04620_18 |
| spleen          | CREB1 | 0.001277819 | path:04620_22 |
| spleen          | CREB1 | 0.001277819 | path:04620_9  |
| spleen          | CREB1 | 0.004131401 | path:04672_4  |
| spleen          | CREB1 | 0.004131401 | path:04672_5  |
| spleen          | CREB1 | 0.004131401 | path:04940_1  |
| spleen          | CREB1 | 0.004288489 | path:05150_14 |
| spleen          | CREB1 | 0.009649083 | path:05200_18 |
| spleen          | CREB1 | 0.004131401 | path:05310_1  |

|        |       |             |               |
|--------|-------|-------------|---------------|
| spleen | CREB1 | 0.004131401 | path:05310_3  |
| spleen | CREB1 | 0.004131401 | path:05320_1  |
| spleen | CREB1 | 0.004131401 | path:05320_3  |
| spleen | CREB1 | 0.004131401 | path:05320_4  |
| spleen | CREB1 | 0.004131401 | path:05320_6  |
| spleen | CREB1 | 0.004131401 | path:05322_5  |
| spleen | CREB1 | 0.004131401 | path:05322_6  |
| spleen | CREB1 | 0.004131401 | path:05330_1  |
| spleen | CREB1 | 0.004131401 | path:05330_2  |
| spleen | CREB1 | 0.004131401 | path:05330_4  |
| spleen | CREB1 | 0.004131401 | path:05332_1  |
| spleen | CREB1 | 0.004131401 | path:05416_4  |
| spleen | ELF1  | 8.41E-06    | path:04060_8  |
| spleen | ELF1  | 0.006320724 | path:04650_1  |
| spleen | ELF1  | 0.001225713 | path:04650_14 |
| spleen | ELF1  | 0.000687264 | path:04650_15 |
| spleen | ELF1  | 0.000687264 | path:04664_1  |
| spleen | ELF1  | 0.000533253 | path:04664_10 |
| spleen | ELF1  | 1.05E-05    | path:04664_2  |
| spleen | ELF1  | 0.000533253 | path:04664_3  |
| spleen | ELF1  | 0.000533253 | path:04664_5  |
| spleen | ELF1  | 0.000533253 | path:04664_9  |
| spleen | ELF1  | 0.006320724 | path:05142_21 |
| spleen | ELF1  | 0.000687264 | path:05310_4  |
| spleen | ELF1  | 0.000687264 | path:05310_5  |
| spleen | HNF1A | 0.008512637 | path:00120_5  |
| spleen | HNF1A | 0.008512637 | path:00140_1  |
| spleen | HNF1A | 3.95E-05    | path:00140_12 |
| spleen | HNF1A | 0.008512637 | path:00140_22 |
| spleen | HNF1A | 0.008512637 | path:00140_23 |
| spleen | HNF1A | 0.008512637 | path:00140_24 |
| spleen | HNF1A | 0.008512637 | path:00140_25 |
| spleen | HNF1A | 0.008512637 | path:00140_26 |
| spleen | HNF1A | 0.008512637 | path:00982_6  |

|         |        |             |               |
|---------|--------|-------------|---------------|
| spleen  | HNFI1A | 0.008512637 | path:04610_6  |
| spleen  | IRF5   | 0.005011517 | path:04060_38 |
| spleen  | IRF5   | 0.005011517 | path:04620_11 |
| spleen  | IRF5   | 0.005011517 | path:04620_2  |
| spleen  | IRF5   | 0.005011517 | path:04650_6  |
| spleen  | IRF5   | 0.005011517 | path:05160_6  |
| spleen  | IRF7   | 5.44E-05    | path:04060_38 |
| spleen  | IRF7   | 3.65E-07    | path:04620_11 |
| spleen  | IRF7   | 1.24E-05    | path:04620_12 |
| spleen  | IRF7   | 0.005131788 | path:04620_14 |
| spleen  | IRF7   | 0.005500251 | path:04620_16 |
| spleen  | IRF7   | 0.009380523 | path:04620_17 |
| spleen  | IRF7   | 0.005305274 | path:04620_18 |
| spleen  | IRF7   | 3.65E-07    | path:04620_2  |
| spleen  | IRF7   | 0.009380523 | path:04620_22 |
| spleen  | IRF7   | 0.009501335 | path:04620_9  |
| spleen  | IRF7   | 5.75E-05    | path:04650_6  |
| spleen  | IRF7   | 5.75E-05    | path:05160_6  |
| spleen  | SPI1   | 0.00153244  | path:04060_41 |
| spleen  | SPI1   | 0.005348786 | path:04145_2  |
| spleen  | SPI1   | 3.11E-06    | path:04145_6  |
| spleen  | SPI1   | 0.007630608 | path:04514_55 |
| spleen  | SPI1   | 0.003570772 | path:04514_62 |
| spleen  | SPI1   | 0.008430928 | path:04650_10 |
| spleen  | SPI1   | 0.007340609 | path:04650_12 |
| spleen  | SPI1   | 0.003805584 | path:04650_13 |
| spleen  | SPI1   | 0.003570772 | path:04670_10 |
| spleen  | SPI1   | 0.00153244  | path:04670_14 |
| spleen  | SPI1   | 0.000961365 | path:04670_15 |
| spleen  | SPI1   | 0.000252274 | path:04670_2  |
| spleen  | SPI1   | 0.000110411 | path:05140_4  |
| spleen  | SPI1   | 0.005348786 | path:05150_17 |
| spleen  | SPI1   | 0.000902646 | path:05200_43 |
| stomach | HNFI1A | 0.008512637 | path:00120_5  |

|         |        |             |               |
|---------|--------|-------------|---------------|
| stomach | HNFI1A | 0.008512637 | path:00140_1  |
| stomach | HNFI1A | 3.95E-05    | path:00140_12 |
| stomach | HNFI1A | 0.008512637 | path:00140_22 |
| stomach | HNFI1A | 0.008512637 | path:00140_23 |
| stomach | HNFI1A | 0.008512637 | path:00140_24 |
| stomach | HNFI1A | 0.008512637 | path:00140_25 |
| stomach | HNFI1A | 0.008512637 | path:00140_26 |
| stomach | HNFI1A | 0.008512637 | path:00982_6  |
| stomach | HNFI1A | 0.008512637 | path:04610_6  |
| T cells | AKNA   | 6.20E-07    | path:04060_31 |
| T cells | AKNA   | 6.20E-07    | path:04514_10 |
| T cells | AKNA   | 6.20E-07    | path:04514_11 |
| T cells | AKNA   | 6.20E-07    | path:04514_12 |
| T cells | AKNA   | 6.20E-07    | path:04514_78 |
| T cells | AKNA   | 6.20E-07    | path:04514_9  |
| T cells | AKNA   | 6.20E-07    | path:04672_2  |
| T cells | AKNA   | 6.20E-07    | path:05144_9  |
| T cells | AKNA   | 6.20E-07    | path:05145_20 |
| T cells | AKNA   | 6.20E-07    | path:05310_2  |
| T cells | AKNA   | 6.20E-07    | path:05320_2  |
| T cells | AKNA   | 6.20E-07    | path:05320_5  |
| T cells | AKNA   | 6.20E-07    | path:05322_7  |
| T cells | AKNA   | 6.20E-07    | path:05330_12 |
| T cells | AKNA   | 6.20E-07    | path:05330_3  |
| T cells | AKNA   | 6.20E-07    | path:05416_3  |
| T cells | CREM   | 0.000820491 | path:05200_29 |
| T cells | EGR1   | 0.009869535 | path:04060_8  |
| T cells | EGR1   | 0.00069989  | path:04510_10 |
| T cells | EGR1   | 0.00069989  | path:04510_18 |
| T cells | EGR1   | 0.003153788 | path:04510_6  |
| T cells | EGR1   | 0.003153788 | path:04510_8  |
| T cells | EGR1   | 0.00129686  | path:04512_3  |
| T cells | EGR1   | 0.003153788 | path:04540_13 |
| T cells | EGR1   | 0.003153788 | path:05146_9  |



|         |        |             |               |
|---------|--------|-------------|---------------|
| T cells | EGR1   | 0.007008495 | path:05212_11 |
| T cells | EGR1   | 0.008365691 | path:05212_12 |
| T cells | EGR1   | 0.003153788 | path:05218_4  |
| T cells | GATA3  | 0.003994597 | path:04612_4  |
| T cells | LEF1   | 0.000671935 | path:04310_6  |
| T cells | LEF1   | 0.000118706 | path:04310_7  |
| T cells | LEF1   | 0.00555092  | path:04916_11 |
| T cells | LEF1   | 0.002645905 | path:04916_3  |
| T cells | LEF1   | 0.007825657 | path:04916_8  |
| T cells | LEF1   | 1.30E-05    | path:05200_31 |
| T cells | LEF1   | 6.00E-05    | path:05200_42 |
| T cells | LEF1   | 0.003595279 | path:05200_50 |
| T cells | LEF1   | 0.002645905 | path:05210_10 |
| T cells | LEF1   | 1.30E-05    | path:05210_12 |
| T cells | LEF1   | 1.30E-05    | path:05210_7  |
| T cells | LEF1   | 2.72E-05    | path:05213_1  |
| T cells | LEF1   | 0.003117148 | path:05215_4  |
| T cells | LEF1   | 1.30E-05    | path:05216_4  |
| T cells | LEF1   | 5.77E-05    | path:05221_1  |
| T cells | LEF1   | 0.005057313 | path:05222_1  |
| T cells | LEF1   | 0.004566365 | path:05222_2  |
| T cells | LEF1   | 0.004078733 | path:05222_7  |
| T cells | NFATC1 | 0.003964221 | path:04060_32 |
| T cells | NFATC1 | 0.003964221 | path:04060_33 |
| T cells | NFATC1 | 0.003964221 | path:04650_20 |
| T cells | SPI1   | 0.00153244  | path:04060_41 |
| T cells | SPI1   | 0.005348786 | path:04145_2  |
| T cells | SPI1   | 3.11E-06    | path:04145_6  |
| T cells | SPI1   | 0.007630608 | path:04514_55 |
| T cells | SPI1   | 0.003570772 | path:04514_62 |
| T cells | SPI1   | 0.008430928 | path:04650_10 |
| T cells | SPI1   | 0.007340609 | path:04650_12 |
| T cells | SPI1   | 0.003805584 | path:04650_13 |
| T cells | SPI1   | 0.003570772 | path:04670_10 |

|         |      |             |               |
|---------|------|-------------|---------------|
| T cells | SPI1 | 0.00153244  | path:04670_14 |
| T cells | SPI1 | 0.000961365 | path:04670_15 |
| T cells | SPI1 | 0.000252274 | path:04670_2  |
| T cells | SPI1 | 0.000110411 | path:05140_4  |
| T cells | SPI1 | 0.005348786 | path:05150_17 |
| T cells | SPI1 | 0.000902646 | path:05200_43 |
| T cells | TCF7 | 0.00669167  | path:04660_20 |
| T47D    | ESR1 | 0.005413618 | path:00830_2  |
| T47D    | ESR1 | 0.000345486 | path:04115_1  |
| T47D    | ESR1 | 0.002979325 | path:04115_2  |
| T47D    | ESR1 | 0.002948202 | path:04115_3  |
| T47D    | ESR1 | 0.002948202 | path:04115_4  |
| T47D    | ESR1 | 0.002948202 | path:04115_7  |
| T47D    | ESR1 | 0.002948202 | path:04610_8  |
| T47D    | ESR1 | 0.000345486 | path:05200_29 |
| T47D    | NFIC | 0.004396514 | path:00591_1  |
| T47D    | NFIC | 0.005988829 | path:00982_11 |
| T47D    | NFIC | 0.00921451  | path:00982_2  |
| T47D    | NFIC | 0.005988829 | path:00982_3  |
| T47D    | NFIC | 0.00787147  | path:00982_4  |
| T47D    | NFIC | 0.00787147  | path:00982_5  |
| T47D    | NFIC | 0.004396514 | path:00982_7  |
| T47D    | NFIC | 0.004396514 | path:00982_8  |
| T47D    | NFIC | 0.00787147  | path:00982_9  |
| T47D    | NFIC | 0.00787147  | path:04010_30 |
| T47D    | NFIC | 0.00787147  | path:04010_31 |
| T47D    | NFIC | 0.004396514 | path:04080_7  |
| T47D    | NFIC | 0.008000492 | path:04115_1  |
| T47D    | NFIC | 0.00787147  | path:04115_2  |
| T47D    | NFIC | 0.00787147  | path:04115_3  |
| T47D    | NFIC | 0.00787147  | path:04115_4  |
| T47D    | NFIC | 0.00787147  | path:04115_7  |
| T47D    | NFIC | 0.00787147  | path:04660_8  |
| T47D    | NFIC | 0.00787147  | path:04662_6  |

|      |      |             |               |
|------|------|-------------|---------------|
| T47D | NFIC | 0.00787147  | path:04722_19 |
| T47D | NFIC | 0.00787147  | path:05160_15 |
| T47D | NFIC | 0.007050709 | path:05200_47 |
| T47D | NFIC | 0.004396514 | path:05200_48 |
| T47D | NFIC | 0.00787147  | path:05200_51 |
| T47D | NFIC | 0.004396514 | path:05214_12 |
| T47D | NFIC | 0.00787147  | path:05214_13 |
| T47D | NFIC | 0.007050709 | path:05214_14 |
| T47D | NFIC | 0.004396514 | path:05218_5  |
| T47D | NFIC | 0.004396514 | path:05218_6  |
| T47D | NFIC | 0.00787147  | path:05220_12 |
| T47D | NFIC | 0.004396514 | path:05220_8  |
| T47D | NFIC | 0.007050709 | path:05220_9  |
| T47D | SP1  | 0.006087664 | path:00120_1  |
| T47D | SP1  | 0.003885876 | path:00120_2  |
| T47D | SP1  | 0.003885876 | path:00120_3  |
| T47D | SP1  | 0.001893526 | path:00140_1  |
| T47D | SP1  | 1.44E-05    | path:00140_10 |
| T47D | SP1  | 0.001534931 | path:00140_11 |
| T47D | SP1  | 0.006087664 | path:00140_12 |
| T47D | SP1  | 2.77E-05    | path:00140_13 |
| T47D | SP1  | 0.003885876 | path:00140_14 |
| T47D | SP1  | 0.000245716 | path:00140_16 |
| T47D | SP1  | 0.000245716 | path:00140_18 |
| T47D | SP1  | 2.77E-05    | path:00140_19 |
| T47D | SP1  | 0.000441307 | path:00140_20 |
| T47D | SP1  | 0.001893526 | path:00140_25 |
| T47D | SP1  | 1.44E-05    | path:00140_3  |
| T47D | SP1  | 1.44E-05    | path:00140_4  |
| T47D | SP1  | 5.07E-05    | path:00140_5  |
| T47D | SP1  | 8.66E-05    | path:00140_6  |
| T47D | SP1  | 2.77E-05    | path:00140_7  |
| T47D | SP1  | 0.000123921 | path:00140_8  |
| T47D | SP1  | 0.000123921 | path:00140_9  |

|      |     |             |               |
|------|-----|-------------|---------------|
| T47D | SP1 | 0.005536058 | path:00240_16 |
| T47D | SP1 | 0.003391309 | path:00240_17 |
| T47D | SP1 | 0.001690362 | path:00240_2  |
| T47D | SP1 | 0.009002988 | path:00240_5  |
| T47D | SP1 | 0.005536058 | path:00330_1  |
| T47D | SP1 | 0.005126386 | path:00330_9  |
| T47D | SP1 | 0.006192277 | path:00350_2  |
| T47D | SP1 | 0.006192277 | path:00350_3  |
| T47D | SP1 | 0.001393247 | path:00980_2  |
| T47D | SP1 | 0.002175912 | path:00982_10 |
| T47D | SP1 | 0.003931316 | path:04010_10 |
| T47D | SP1 | 0.000441307 | path:04010_26 |
| T47D | SP1 | 0.000123921 | path:04010_5  |
| T47D | SP1 | 0.002149604 | path:04060_22 |
| T47D | SP1 | 0.001014956 | path:04060_32 |
| T47D | SP1 | 0.007433507 | path:04060_47 |
| T47D | SP1 | 0.00916136  | path:04110_1  |
| T47D | SP1 | 1.86E-10    | path:04110_17 |
| T47D | SP1 | 4.28E-11    | path:04110_18 |
| T47D | SP1 | 1.05E-10    | path:04110_19 |
| T47D | SP1 | 2.92E-09    | path:04110_20 |
| T47D | SP1 | 1.43E-05    | path:04110_22 |
| T47D | SP1 | 5.22E-09    | path:04110_23 |
| T47D | SP1 | 0.006192277 | path:04110_25 |
| T47D | SP1 | 7.70E-08    | path:04110_26 |
| T47D | SP1 | 2.92E-09    | path:04110_27 |
| T47D | SP1 | 6.46E-09    | path:04110_3  |
| T47D | SP1 | 6.46E-09    | path:04110_4  |
| T47D | SP1 | 4.97E-07    | path:04110_7  |
| T47D | SP1 | 3.47E-10    | path:04115_1  |
| T47D | SP1 | 6.74E-05    | path:04115_2  |
| T47D | SP1 | 4.23E-05    | path:04115_3  |
| T47D | SP1 | 6.18E-06    | path:04115_4  |
| T47D | SP1 | 4.96E-05    | path:04115_7  |

|      |     |             |               |
|------|-----|-------------|---------------|
| T47D | SP1 | 7.61E-06    | path:04144_2  |
| T47D | SP1 | 0.002175912 | path:04210_20 |
| T47D | SP1 | 0.001107767 | path:04210_24 |
| T47D | SP1 | 1.33E-05    | path:04310_6  |
| T47D | SP1 | 1.77E-05    | path:04310_7  |
| T47D | SP1 | 7.85E-13    | path:04510_1  |
| T47D | SP1 | 1.05E-10    | path:04510_10 |
| T47D | SP1 | 0.001603207 | path:04510_13 |
| T47D | SP1 | 0.001164758 | path:04510_15 |
| T47D | SP1 | 0.002771235 | path:04510_16 |
| T47D | SP1 | 0.000141426 | path:04510_17 |
| T47D | SP1 | 8.07E-08    | path:04510_18 |
| T47D | SP1 | 1.96E-12    | path:04510_19 |
| T47D | SP1 | 1.43E-05    | path:04510_20 |
| T47D | SP1 | 0.000718519 | path:04510_23 |
| T47D | SP1 | 0.002175912 | path:04510_24 |
| T47D | SP1 | 0.0024986   | path:04510_25 |
| T47D | SP1 | 6.74E-05    | path:04510_4  |
| T47D | SP1 | 0.0024986   | path:04510_5  |
| T47D | SP1 | 1.07E-10    | path:04510_6  |
| T47D | SP1 | 0.000448433 | path:04510_7  |
| T47D | SP1 | 6.16E-10    | path:04510_8  |
| T47D | SP1 | 2.01E-05    | path:04512_10 |
| T47D | SP1 | 5.55E-06    | path:04512_11 |
| T47D | SP1 | 1.66E-06    | path:04512_12 |
| T47D | SP1 | 7.86E-06    | path:04512_13 |
| T47D | SP1 | 0.000101569 | path:04512_14 |
| T47D | SP1 | 0.000245716 | path:04512_18 |
| T47D | SP1 | 0.000549822 | path:04512_19 |
| T47D | SP1 | 0.002149604 | path:04512_20 |
| T47D | SP1 | 0.008608739 | path:04512_22 |
| T47D | SP1 | 0.00016592  | path:04512_27 |
| T47D | SP1 | 1.66E-05    | path:04512_3  |
| T47D | SP1 | 2.72E-07    | path:04512_5  |

|      |     |             |               |
|------|-----|-------------|---------------|
| T47D | SP1 | 6.24E-07    | path:04512_6  |
| T47D | SP1 | 9.36E-06    | path:04512_9  |
| T47D | SP1 | 0.005126386 | path:04520_3  |
| T47D | SP1 | 0.001603207 | path:04520_5  |
| T47D | SP1 | 0.000412181 | path:04520_7  |
| T47D | SP1 | 1.22E-05    | path:04540_13 |
| T47D | SP1 | 9.21E-07    | path:04610_3  |
| T47D | SP1 | 5.55E-06    | path:04610_4  |
| T47D | SP1 | 9.21E-07    | path:04610_6  |
| T47D | SP1 | 0.000133832 | path:04610_7  |
| T47D | SP1 | 0.000203885 | path:04610_8  |
| T47D | SP1 | 0.000203885 | path:04620_18 |
| T47D | SP1 | 0.001893526 | path:04620_9  |
| T47D | SP1 | 0.000231547 | path:04630_1  |
| T47D | SP1 | 0.001390056 | path:04630_2  |
| T47D | SP1 | 1.97E-06    | path:04630_3  |
| T47D | SP1 | 5.95E-06    | path:04630_4  |
| T47D | SP1 | 4.84E-05    | path:04650_20 |
| T47D | SP1 | 0.008608739 | path:04650_7  |
| T47D | SP1 | 0.000718519 | path:04722_19 |
| T47D | SP1 | 7.92E-07    | path:04810_29 |
| T47D | SP1 | 1.33E-05    | path:04912_8  |
| T47D | SP1 | 0.007433507 | path:04940_4  |
| T47D | SP1 | 0.006087664 | path:05014_3  |
| T47D | SP1 | 0.008608739 | path:05014_4  |
| T47D | SP1 | 0.007433507 | path:05016_8  |
| T47D | SP1 | 0.001014956 | path:05100_3  |
| T47D | SP1 | 0.008608739 | path:05140_10 |
| T47D | SP1 | 0.000245716 | path:05140_6  |
| T47D | SP1 | 0.001107767 | path:05142_10 |
| T47D | SP1 | 0.003931316 | path:05142_11 |
| T47D | SP1 | 0.003885876 | path:05142_17 |
| T47D | SP1 | 0.003885876 | path:05142_18 |
| T47D | SP1 | 0.000441307 | path:05142_20 |

|      |     |             |               |
|------|-----|-------------|---------------|
| T47D | SP1 | 0.000718519 | path:05142_21 |
| T47D | SP1 | 0.001107767 | path:05142_4  |
| T47D | SP1 | 0.006087664 | path:05145_19 |
| T47D | SP1 | 0.001014956 | path:05145_21 |
| T47D | SP1 | 0.006087664 | path:05145_8  |
| T47D | SP1 | 1.23E-06    | path:05146_1  |
| T47D | SP1 | 7.92E-07    | path:05146_2  |
| T47D | SP1 | 0.002149604 | path:05146_5  |
| T47D | SP1 | 9.10E-07    | path:05146_9  |
| T47D | SP1 | 0.003935354 | path:05200_19 |
| T47D | SP1 | 0.003935354 | path:05200_20 |
| T47D | SP1 | 0.00927462  | path:05200_24 |
| T47D | SP1 | 9.21E-07    | path:05200_29 |
| T47D | SP1 | 2.01E-05    | path:05200_3  |
| T47D | SP1 | 0.000718519 | path:05200_31 |
| T47D | SP1 | 0.008608739 | path:05200_38 |
| T47D | SP1 | 0.000289957 | path:05200_4  |
| T47D | SP1 | 0.000718519 | path:05200_42 |
| T47D | SP1 | 2.07E-08    | path:05200_47 |
| T47D | SP1 | 1.33E-05    | path:05200_48 |
| T47D | SP1 | 5.07E-05    | path:05200_50 |
| T47D | SP1 | 5.54E-09    | path:05200_51 |
| T47D | SP1 | 1.55E-08    | path:05200_52 |
| T47D | SP1 | 4.11E-06    | path:05200_53 |
| T47D | SP1 | 0.001014956 | path:05200_56 |
| T47D | SP1 | 0.000441307 | path:05210_10 |
| T47D | SP1 | 0.000718519 | path:05210_12 |
| T47D | SP1 | 0.000718519 | path:05210_7  |
| T47D | SP1 | 1.44E-05    | path:05212_13 |
| T47D | SP1 | 0.008608739 | path:05212_14 |
| T47D | SP1 | 1.33E-05    | path:05214_12 |
| T47D | SP1 | 1.18E-07    | path:05214_13 |
| T47D | SP1 | 2.07E-08    | path:05214_14 |
| T47D | SP1 | 9.21E-07    | path:05214_15 |

|      |      |             |               |
|------|------|-------------|---------------|
| T47D | SP1  | 0.005536058 | path:05214_2  |
| T47D | SP1  | 0.000245716 | path:05214_21 |
| T47D | SP1  | 0.005536058 | path:05214_5  |
| T47D | SP1  | 0.001164758 | path:05215_10 |
| T47D | SP1  | 0.008608739 | path:05215_7  |
| T47D | SP1  | 0.000441307 | path:05216_4  |
| T47D | SP1  | 0.000411461 | path:05218_4  |
| T47D | SP1  | 0.000133832 | path:05218_5  |
| T47D | SP1  | 1.33E-05    | path:05218_6  |
| T47D | SP1  | 9.21E-07    | path:05218_7  |
| T47D | SP1  | 7.27E-05    | path:05218_8  |
| T47D | SP1  | 0.000310459 | path:05219_3  |
| T47D | SP1  | 1.44E-05    | path:05219_4  |
| T47D | SP1  | 9.21E-07    | path:05220_11 |
| T47D | SP1  | 1.18E-07    | path:05220_12 |
| T47D | SP1  | 0.002149604 | path:05220_5  |
| T47D | SP1  | 1.33E-05    | path:05220_8  |
| T47D | SP1  | 2.07E-08    | path:05220_9  |
| T47D | SP1  | 0.006192277 | path:05221_1  |
| T47D | SP1  | 5.36E-07    | path:05222_1  |
| T47D | SP1  | 0.000133832 | path:05222_2  |
| T47D | SP1  | 2.01E-05    | path:05222_4  |
| T47D | SP1  | 0.001603207 | path:05222_7  |
| T47D | SP1  | 1.44E-05    | path:05223_3  |
| T47D | SP1  | 0.007433507 | path:05320_9  |
| T47D | SP1  | 0.007433507 | path:05330_5  |
| T47D | SP1  | 0.007433507 | path:05332_2  |
| T47D | SP1  | 0.007433507 | path:05332_5  |
| T47D | SP1  | 1.77E-05    | path:05414_2  |
| T98  | NFIC | 0.004396514 | path:00591_1  |
| T98  | NFIC | 0.005988829 | path:00982_11 |
| T98  | NFIC | 0.00921451  | path:00982_2  |
| T98  | NFIC | 0.005988829 | path:00982_3  |
| T98  | NFIC | 0.00787147  | path:00982_4  |



|        |      |             |               |
|--------|------|-------------|---------------|
| T98    | NFIC | 0.00787147  | path:00982_5  |
| T98    | NFIC | 0.004396514 | path:00982_7  |
| T98    | NFIC | 0.004396514 | path:00982_8  |
| T98    | NFIC | 0.00787147  | path:00982_9  |
| T98    | NFIC | 0.00787147  | path:04010_30 |
| T98    | NFIC | 0.00787147  | path:04010_31 |
| T98    | NFIC | 0.004396514 | path:04080_7  |
| T98    | NFIC | 0.008000492 | path:04115_1  |
| T98    | NFIC | 0.00787147  | path:04115_2  |
| T98    | NFIC | 0.00787147  | path:04115_3  |
| T98    | NFIC | 0.00787147  | path:04115_4  |
| T98    | NFIC | 0.00787147  | path:04115_7  |
| T98    | NFIC | 0.00787147  | path:04660_8  |
| T98    | NFIC | 0.00787147  | path:04662_6  |
| T98    | NFIC | 0.00787147  | path:04722_19 |
| T98    | NFIC | 0.00787147  | path:05160_15 |
| T98    | NFIC | 0.007050709 | path:05200_47 |
| T98    | NFIC | 0.004396514 | path:05200_48 |
| T98    | NFIC | 0.00787147  | path:05200_51 |
| T98    | NFIC | 0.004396514 | path:05214_12 |
| T98    | NFIC | 0.00787147  | path:05214_13 |
| T98    | NFIC | 0.007050709 | path:05214_14 |
| T98    | NFIC | 0.004396514 | path:05218_5  |
| T98    | NFIC | 0.004396514 | path:05218_6  |
| T98    | NFIC | 0.00787147  | path:05220_12 |
| T98    | NFIC | 0.004396514 | path:05220_8  |
| T98    | NFIC | 0.007050709 | path:05220_9  |
| testis | AKNA | 6.20E-07    | path:04060_31 |
| testis | AKNA | 6.20E-07    | path:04514_10 |
| testis | AKNA | 6.20E-07    | path:04514_11 |
| testis | AKNA | 6.20E-07    | path:04514_12 |
| testis | AKNA | 6.20E-07    | path:04514_78 |
| testis | AKNA | 6.20E-07    | path:04514_9  |
| testis | AKNA | 6.20E-07    | path:04672_2  |

|        |       |             |               |
|--------|-------|-------------|---------------|
| testis | AKNA  | 6.20E-07    | path:05144_9  |
| testis | AKNA  | 6.20E-07    | path:05145_20 |
| testis | AKNA  | 6.20E-07    | path:05310_2  |
| testis | AKNA  | 6.20E-07    | path:05320_2  |
| testis | AKNA  | 6.20E-07    | path:05320_5  |
| testis | AKNA  | 6.20E-07    | path:05322_7  |
| testis | AKNA  | 6.20E-07    | path:05330_12 |
| testis | AKNA  | 6.20E-07    | path:05330_3  |
| testis | AKNA  | 6.20E-07    | path:05416_3  |
| testis | CREB1 | 0.004288489 | path:04514_1  |
| testis | CREB1 | 0.004288489 | path:04514_3  |
| testis | CREB1 | 0.004288489 | path:04612_3  |
| testis | CREB1 | 0.004131401 | path:04620_12 |
| testis | CREB1 | 0.004131401 | path:04620_16 |
| testis | CREB1 | 0.001277819 | path:04620_17 |
| testis | CREB1 | 0.000627719 | path:04620_18 |
| testis | CREB1 | 0.001277819 | path:04620_22 |
| testis | CREB1 | 0.001277819 | path:04620_9  |
| testis | CREB1 | 0.004131401 | path:04672_4  |
| testis | CREB1 | 0.004131401 | path:04672_5  |
| testis | CREB1 | 0.004131401 | path:04940_1  |
| testis | CREB1 | 0.004288489 | path:05150_14 |
| testis | CREB1 | 0.009649083 | path:05200_18 |
| testis | CREB1 | 0.004131401 | path:05310_1  |
| testis | CREB1 | 0.004131401 | path:05310_3  |
| testis | CREB1 | 0.004131401 | path:05320_1  |
| testis | CREB1 | 0.004131401 | path:05320_3  |
| testis | CREB1 | 0.004131401 | path:05320_4  |
| testis | CREB1 | 0.004131401 | path:05320_6  |
| testis | CREB1 | 0.004131401 | path:05322_5  |
| testis | CREB1 | 0.004131401 | path:05322_6  |
| testis | CREB1 | 0.004131401 | path:05330_1  |
| testis | CREB1 | 0.004131401 | path:05330_2  |
| testis | CREB1 | 0.004131401 | path:05330_4  |

|        |       |             |               |
|--------|-------|-------------|---------------|
| testis | CREB1 | 0.004131401 | path:05332_1  |
| testis | CREB1 | 0.004131401 | path:05416_4  |
| testis | HNF4A | 0.00730316  | path:00120_15 |
| testis | HNF4A | 0.003812707 | path:00120_19 |
| testis | HNF4A | 0.001698537 | path:00120_6  |
| testis | HNF4A | 0.003812707 | path:00120_7  |
| testis | HNF4A | 0.000100826 | path:00120_9  |
| testis | HNF4A | 0.001808381 | path:00590_1  |
| testis | HNF4A | 0.001722691 | path:00590_2  |
| testis | HNF4A | 0.001722691 | path:00590_3  |
| testis | HNF4A | 0.001898001 | path:00590_4  |
| testis | HNF4A | 0.000515682 | path:00591_1  |
| testis | HNF4A | 2.36E-05    | path:00830_2  |
| testis | HNF4A | 0.000733563 | path:00980_2  |
| testis | HNF4A | 2.52E-07    | path:00982_10 |
| testis | HNF4A | 5.38E-08    | path:00982_4  |
| testis | HNF4A | 5.38E-08    | path:00982_5  |
| testis | HNF4A | 5.38E-08    | path:00982_9  |
| testis | HNF4A | 0.001131883 | path:03320_1  |
| testis | HNF4A | 0.000100826 | path:03320_2  |
| testis | HNF4A | 4.35E-06    | path:04610_2  |
| testis | HNF4A | 4.35E-06    | path:04610_3  |
| testis | HNF4A | 0.000100826 | path:04610_4  |
| testis | HNF4A | 6.69E-06    | path:04610_5  |
| testis | HNF4A | 0.000179282 | path:04610_6  |
| testis | HNF4A | 0.001698537 | path:04610_8  |
| testis | HNF4A | 0.000287791 | path:04950_4  |
| testis | KLF5  | 0.000357162 | path:05200_31 |
| testis | KLF5  | 0.000357162 | path:05210_12 |
| testis | KLF5  | 0.000357162 | path:05210_7  |
| testis | SPI1  | 0.00153244  | path:04060_41 |
| testis | SPI1  | 0.005348786 | path:04145_2  |
| testis | SPI1  | 3.11E-06    | path:04145_6  |
| testis | SPI1  | 0.007630608 | path:04514_55 |

|        |      |             |               |
|--------|------|-------------|---------------|
| testis | SPI1 | 0.003570772 | path:04514_62 |
| testis | SPI1 | 0.008430928 | path:04650_10 |
| testis | SPI1 | 0.007340609 | path:04650_12 |
| testis | SPI1 | 0.003805584 | path:04650_13 |
| testis | SPI1 | 0.003570772 | path:04670_10 |
| testis | SPI1 | 0.00153244  | path:04670_14 |
| testis | SPI1 | 0.000961365 | path:04670_15 |
| testis | SPI1 | 0.000252274 | path:04670_2  |
| testis | SPI1 | 0.000110411 | path:05140_4  |
| testis | SPI1 | 0.005348786 | path:05150_17 |
| testis | SPI1 | 0.000902646 | path:05200_43 |
| testis | TP53 | 0.007702858 | path:04010_15 |
| testis | TP53 | 0.009062653 | path:04010_16 |
| testis | TP53 | 0.007443002 | path:04010_21 |
| testis | TP53 | 0.002466645 | path:04012_12 |
| testis | TP53 | 2.55E-11    | path:04110_1  |
| testis | TP53 | 3.28E-07    | path:04110_17 |
| testis | TP53 | 1.48E-05    | path:04110_19 |
| testis | TP53 | 0.001943417 | path:04110_20 |
| testis | TP53 | 7.56E-05    | path:04110_22 |
| testis | TP53 | 0.000198814 | path:04110_23 |
| testis | TP53 | 0.001943417 | path:04110_27 |
| testis | TP53 | 0.000210553 | path:04110_3  |
| testis | TP53 | 0.004511216 | path:04110_4  |
| testis | TP53 | 4.42E-09    | path:04110_7  |
| testis | TP53 | 0.004291125 | path:04110_8  |
| testis | TP53 | 0           | path:04115_1  |
| testis | TP53 | 0           | path:04115_2  |
| testis | TP53 | 0           | path:04115_3  |
| testis | TP53 | 0           | path:04115_4  |
| testis | TP53 | 0           | path:04115_7  |
| testis | TP53 | 0.000421718 | path:04210_20 |
| testis | TP53 | 0.000275763 | path:04210_23 |
| testis | TP53 | 0.000275763 | path:04210_24 |

|        |      |             |               |
|--------|------|-------------|---------------|
| testis | TP53 | 0.009131774 | path:04510_10 |
| testis | TP53 | 0.004511216 | path:04510_15 |
| testis | TP53 | 0.002466645 | path:04510_16 |
| testis | TP53 | 0.000580605 | path:04510_17 |
| testis | TP53 | 0.001774645 | path:04510_18 |
| testis | TP53 | 0.006951959 | path:04510_25 |
| testis | TP53 | 0.006951959 | path:04510_5  |
| testis | TP53 | 0.009576653 | path:04510_6  |
| testis | TP53 | 0.001110697 | path:04510_7  |
| testis | TP53 | 0.00935253  | path:04510_8  |
| testis | TP53 | 0.009062653 | path:04621_7  |
| testis | TP53 | 0.000218217 | path:04722_19 |
| testis | TP53 | 0.002756828 | path:04912_8  |
| testis | TP53 | 0.009062653 | path:05014_4  |
| testis | TP53 | 0.007459365 | path:05160_12 |
| testis | TP53 | 0.009062653 | path:05160_15 |
| testis | TP53 | 0.000338058 | path:05200_10 |
| testis | TP53 | 0.000275763 | path:05200_11 |
| testis | TP53 | 0.000275763 | path:05200_12 |
| testis | TP53 | 0.000968321 | path:05200_15 |
| testis | TP53 | 0.00392722  | path:05200_17 |
| testis | TP53 | 0.002997803 | path:05200_19 |
| testis | TP53 | 0.00011707  | path:05200_20 |
| testis | TP53 | 0.000275763 | path:05200_4  |
| testis | TP53 | 7.56E-05    | path:05200_47 |
| testis | TP53 | 1.95E-05    | path:05200_48 |
| testis | TP53 | 0.000367024 | path:05200_5  |
| testis | TP53 | 0.000172314 | path:05200_51 |
| testis | TP53 | 1.95E-05    | path:05200_8  |
| testis | TP53 | 0.007459365 | path:05213_2  |
| testis | TP53 | 0.003580594 | path:05214_1  |
| testis | TP53 | 0.000210553 | path:05214_10 |
| testis | TP53 | 0.001774645 | path:05214_11 |
| testis | TP53 | 1.95E-05    | path:05214_12 |

|        |       |             |               |
|--------|-------|-------------|---------------|
| testis | TP53  | 0.00011707  | path:05214_13 |
| testis | TP53  | 7.56E-05    | path:05214_14 |
| testis | TP53  | 0.003580594 | path:05214_4  |
| testis | TP53  | 0.004511216 | path:05215_10 |
| testis | TP53  | 0.000275763 | path:05215_11 |
| testis | TP53  | 0.00331496  | path:05215_3  |
| testis | TP53  | 0.002754132 | path:05218_2  |
| testis | TP53  | 0.001774645 | path:05218_5  |
| testis | TP53  | 1.95E-05    | path:05218_6  |
| testis | TP53  | 0.001385048 | path:05218_8  |
| testis | TP53  | 0.001691972 | path:05219_3  |
| testis | TP53  | 0.009062653 | path:05219_4  |
| testis | TP53  | 0.00011707  | path:05220_12 |
| testis | TP53  | 1.95E-05    | path:05220_8  |
| testis | TP53  | 7.56E-05    | path:05220_9  |
| thymus | AKNA  | 6.20E-07    | path:04060_31 |
| thymus | AKNA  | 6.20E-07    | path:04514_10 |
| thymus | AKNA  | 6.20E-07    | path:04514_11 |
| thymus | AKNA  | 6.20E-07    | path:04514_12 |
| thymus | AKNA  | 6.20E-07    | path:04514_78 |
| thymus | AKNA  | 6.20E-07    | path:04514_9  |
| thymus | AKNA  | 6.20E-07    | path:04672_2  |
| thymus | AKNA  | 6.20E-07    | path:05144_9  |
| thymus | AKNA  | 6.20E-07    | path:05145_20 |
| thymus | AKNA  | 6.20E-07    | path:05310_2  |
| thymus | AKNA  | 6.20E-07    | path:05320_2  |
| thymus | AKNA  | 6.20E-07    | path:05320_5  |
| thymus | AKNA  | 6.20E-07    | path:05322_7  |
| thymus | AKNA  | 6.20E-07    | path:05330_12 |
| thymus | AKNA  | 6.20E-07    | path:05330_3  |
| thymus | AKNA  | 6.20E-07    | path:05416_3  |
| thymus | CREB1 | 0.004288489 | path:04514_1  |
| thymus | CREB1 | 0.004288489 | path:04514_3  |
| thymus | CREB1 | 0.004288489 | path:04612_3  |

|        |       |             |               |
|--------|-------|-------------|---------------|
| thymus | CREB1 | 0.004131401 | path:04620_12 |
| thymus | CREB1 | 0.004131401 | path:04620_16 |
| thymus | CREB1 | 0.001277819 | path:04620_17 |
| thymus | CREB1 | 0.000627719 | path:04620_18 |
| thymus | CREB1 | 0.001277819 | path:04620_22 |
| thymus | CREB1 | 0.001277819 | path:04620_9  |
| thymus | CREB1 | 0.004131401 | path:04672_4  |
| thymus | CREB1 | 0.004131401 | path:04672_5  |
| thymus | CREB1 | 0.004131401 | path:04940_1  |
| thymus | CREB1 | 0.004288489 | path:05150_14 |
| thymus | CREB1 | 0.009649083 | path:05200_18 |
| thymus | CREB1 | 0.004131401 | path:05310_1  |
| thymus | CREB1 | 0.004131401 | path:05310_3  |
| thymus | CREB1 | 0.004131401 | path:05320_1  |
| thymus | CREB1 | 0.004131401 | path:05320_3  |
| thymus | CREB1 | 0.004131401 | path:05320_4  |
| thymus | CREB1 | 0.004131401 | path:05320_6  |
| thymus | CREB1 | 0.004131401 | path:05322_5  |
| thymus | CREB1 | 0.004131401 | path:05322_6  |
| thymus | CREB1 | 0.004131401 | path:05330_1  |
| thymus | CREB1 | 0.004131401 | path:05330_2  |
| thymus | CREB1 | 0.004131401 | path:05330_4  |
| thymus | CREB1 | 0.004131401 | path:05332_1  |
| thymus | CREB1 | 0.004131401 | path:05416_4  |
| thymus | ELF1  | 8.41E-06    | path:04060_8  |
| thymus | ELF1  | 0.006320724 | path:04650_1  |
| thymus | ELF1  | 0.001225713 | path:04650_14 |
| thymus | ELF1  | 0.000687264 | path:04650_15 |
| thymus | ELF1  | 0.000687264 | path:04664_1  |
| thymus | ELF1  | 0.000533253 | path:04664_10 |
| thymus | ELF1  | 1.05E-05    | path:04664_2  |
| thymus | ELF1  | 0.000533253 | path:04664_3  |
| thymus | ELF1  | 0.000533253 | path:04664_5  |
| thymus | ELF1  | 0.000533253 | path:04664_9  |

|        |      |             |               |
|--------|------|-------------|---------------|
| thymus | ELF1 | 0.006320724 | path:05142_21 |
| thymus | ELF1 | 0.000687264 | path:05310_4  |
| thymus | ELF1 | 0.000687264 | path:05310_5  |
| thymus | IRF5 | 0.005011517 | path:04060_38 |
| thymus | IRF5 | 0.005011517 | path:04620_11 |
| thymus | IRF5 | 0.005011517 | path:04620_2  |
| thymus | IRF5 | 0.005011517 | path:04650_6  |
| thymus | IRF5 | 0.005011517 | path:05160_6  |
| thymus | IRF7 | 5.44E-05    | path:04060_38 |
| thymus | IRF7 | 3.65E-07    | path:04620_11 |
| thymus | IRF7 | 1.24E-05    | path:04620_12 |
| thymus | IRF7 | 0.005131788 | path:04620_14 |
| thymus | IRF7 | 0.005500251 | path:04620_16 |
| thymus | IRF7 | 0.009380523 | path:04620_17 |
| thymus | IRF7 | 0.005305274 | path:04620_18 |
| thymus | IRF7 | 3.65E-07    | path:04620_2  |
| thymus | IRF7 | 0.009380523 | path:04620_22 |
| thymus | IRF7 | 0.009501335 | path:04620_9  |
| thymus | IRF7 | 5.75E-05    | path:04650_6  |
| thymus | IRF7 | 5.75E-05    | path:05160_6  |
| thymus | LEF1 | 0.000671935 | path:04310_6  |
| thymus | LEF1 | 0.000118706 | path:04310_7  |
| thymus | LEF1 | 0.00555092  | path:04916_11 |
| thymus | LEF1 | 0.002645905 | path:04916_3  |
| thymus | LEF1 | 0.007825657 | path:04916_8  |
| thymus | LEF1 | 1.30E-05    | path:05200_31 |
| thymus | LEF1 | 6.00E-05    | path:05200_42 |
| thymus | LEF1 | 0.003595279 | path:05200_50 |
| thymus | LEF1 | 0.002645905 | path:05210_10 |
| thymus | LEF1 | 1.30E-05    | path:05210_12 |
| thymus | LEF1 | 1.30E-05    | path:05210_7  |
| thymus | LEF1 | 2.72E-05    | path:05213_1  |
| thymus | LEF1 | 0.003117148 | path:05215_4  |
| thymus | LEF1 | 1.30E-05    | path:05216_4  |



|        |      |             |               |
|--------|------|-------------|---------------|
| thymus | LEF1 | 5.77E-05    | path:05221_1  |
| thymus | LEF1 | 0.005057313 | path:05222_1  |
| thymus | LEF1 | 0.004566365 | path:05222_2  |
| thymus | LEF1 | 0.004078733 | path:05222_7  |
| thymus | SPI1 | 0.00153244  | path:04060_41 |
| thymus | SPI1 | 0.005348786 | path:04145_2  |
| thymus | SPI1 | 3.11E-06    | path:04145_6  |
| thymus | SPI1 | 0.007630608 | path:04514_55 |
| thymus | SPI1 | 0.003570772 | path:04514_62 |
| thymus | SPI1 | 0.008430928 | path:04650_10 |
| thymus | SPI1 | 0.007340609 | path:04650_12 |
| thymus | SPI1 | 0.003805584 | path:04650_13 |
| thymus | SPI1 | 0.003570772 | path:04670_10 |
| thymus | SPI1 | 0.00153244  | path:04670_14 |
| thymus | SPI1 | 0.000961365 | path:04670_15 |
| thymus | SPI1 | 0.000252274 | path:04670_2  |
| thymus | SPI1 | 0.000110411 | path:05140_4  |
| thymus | SPI1 | 0.005348786 | path:05150_17 |
| thymus | SPI1 | 0.000902646 | path:05200_43 |
| thymus | TP63 | 2.23E-05    | path:04110_1  |
| thymus | TP63 | 8.12E-05    | path:04110_7  |
| thymus | TP63 | 8.12E-05    | path:04115_1  |
| thymus | TP63 | 8.12E-05    | path:04115_2  |
| thymus | TP63 | 8.12E-05    | path:04115_3  |
| thymus | TP63 | 8.12E-05    | path:04115_4  |
| thymus | TP63 | 8.12E-05    | path:04115_7  |
| thymus | TP63 | 0.003115907 | path:05200_17 |
| thymus | TP63 | 0.002783081 | path:05200_19 |
| thymus | TP63 | 0.002783081 | path:05200_20 |
| thymus | TP63 | 0.000159403 | path:05200_47 |
| thymus | TP63 | 8.12E-05    | path:05200_48 |
| thymus | TP63 | 8.12E-05    | path:05214_12 |
| thymus | TP63 | 0.000159403 | path:05214_14 |
| thymus | TP63 | 0.004120782 | path:05215_11 |

|         |       |             |               |
|---------|-------|-------------|---------------|
| thymus  | TP63  | 0.002837304 | path:05215_3  |
| thymus  | TP63  | 8.12E-05    | path:05218_6  |
| thymus  | TP63  | 8.12E-05    | path:05220_8  |
| thymus  | TP63  | 0.000159403 | path:05220_9  |
| thyroid | HNF1A | 0.008512637 | path:00120_5  |
| thyroid | HNF1A | 0.008512637 | path:00140_1  |
| thyroid | HNF1A | 3.95E-05    | path:00140_12 |
| thyroid | HNF1A | 0.008512637 | path:00140_22 |
| thyroid | HNF1A | 0.008512637 | path:00140_23 |
| thyroid | HNF1A | 0.008512637 | path:00140_24 |
| thyroid | HNF1A | 0.008512637 | path:00140_25 |
| thyroid | HNF1A | 0.008512637 | path:00140_26 |
| thyroid | HNF1A | 0.008512637 | path:00982_6  |
| thyroid | HNF1A | 0.008512637 | path:04610_6  |
| thyroid | NR4A1 | 0.00077713  | path:00140_10 |
| thyroid | NR4A1 | 6.42E-06    | path:00140_13 |
| thyroid | NR4A1 | 0.00077713  | path:00140_14 |
| thyroid | NR4A1 | 0.00077713  | path:00140_16 |
| thyroid | NR4A1 | 0.00077713  | path:00140_18 |
| thyroid | NR4A1 | 0.000832486 | path:00140_19 |
| thyroid | NR4A1 | 0.00077713  | path:00140_20 |
| thyroid | NR4A1 | 0.00077713  | path:00140_3  |
| thyroid | NR4A1 | 0.00077713  | path:00140_4  |
| thyroid | NR4A1 | 0.000960385 | path:00140_5  |
| thyroid | NR4A1 | 0.001089761 | path:00140_6  |
| thyroid | NR4A1 | 0.000832486 | path:00140_7  |
| thyroid | NR4A1 | 0.00077713  | path:00140_8  |
| thyroid | NR4A1 | 0.00077713  | path:00140_9  |

---

**Table S6.** The detailed information of the significant TF-subpathway associations between TFs and subpathways in the TSN with k=4.

| TF_Name | Subpathway    | P_Value  |
|---------|---------------|----------|
| SP1     | path:04510_5  | 0        |
| SP1     | path:04510_6  | 0        |
| SP1     | path:04510_7  | 0        |
| SP1     | path:04510_13 | 0        |
| SP1     | path:05200_15 | 0        |
| SP1     | path:05200_25 | 0        |
| SP1     | path:05200_37 | 0        |
| SP1     | path:05200_38 | 0        |
| SP1     | path:05200_39 | 0        |
| TP53    | path:04115_2  | 0        |
| SP1     | path:05200_35 | 2.28E-14 |
| SP1     | path:04512_3  | 7.27E-14 |
| SP1     | path:04110_13 | 6.38E-13 |
| SP1     | path:04110_10 | 7.65E-13 |
| SP1     | path:04110_11 | 1.26E-12 |
| SP1     | path:04512_1  | 1.42E-12 |
| SP1     | path:05200_21 | 5.41E-12 |
| IRF3    | path:04620_3  | 6.11E-12 |
| IRF3    | path:04620_1  | 6.11E-12 |
| IRF7    | path:04620_3  | 6.11E-12 |
| IRF7    | path:04620_1  | 6.11E-12 |
| SP1     | path:04510_14 | 6.46E-12 |
| SP1     | path:04510_1  | 7.27E-12 |
| SP1     | path:04110_9  | 1.26E-11 |
| IRF3    | path:04620_4  | 1.29E-11 |
| IRF7    | path:04620_4  | 1.29E-11 |
| SP1     | path:04115_2  | 3.58E-11 |
| SP1     | path:04512_2  | 3.58E-11 |
| SP1     | path:05200_7  | 8.22E-11 |
| SP1     | path:05200_2  | 1.66E-10 |
| TP53    | path:04110_2  | 2.00E-10 |
| SP1     | path:04110_5  | 2.09E-10 |
| SP1     | path:05200_26 | 2.35E-10 |
| SP1     | path:05200_13 | 2.35E-10 |
| SP1     | path:05200_24 | 3.40E-10 |
| IRF1    | path:04620_4  | 3.47E-10 |
| RELA    | path:04620_4  | 3.88E-10 |
| STAT3   | path:05200_25 | 4.16E-10 |
| E2F1    | path:04110_11 | 4.74E-10 |
| E2F1    | path:04110_10 | 4.74E-10 |
| E2F1    | path:04110_9  | 4.74E-10 |

|        |               |          |
|--------|---------------|----------|
| E2F1   | path:04110_5  | 4.74E-10 |
| SP1    | path:05214_3  | 4.99E-10 |
| SP1    | path:05220_4  | 4.99E-10 |
| RELA   | path:04620_3  | 1.21E-09 |
| STAT3  | path:05200_37 | 1.34E-09 |
| E2F1   | path:04110_1  | 1.46E-09 |
| RELA   | path:04620_1  | 1.59E-09 |
| TP53   | path:04110_10 | 2.36E-09 |
| TP53   | path:04110_9  | 2.36E-09 |
| TP53   | path:04110_5  | 2.36E-09 |
| SP3    | path:05200_39 | 2.41E-09 |
| SP3    | path:04512_1  | 2.62E-09 |
| SP3    | path:04510_13 | 2.62E-09 |
| SP3    | path:04510_6  | 2.62E-09 |
| SP3    | path:04510_5  | 2.62E-09 |
| SP3    | path:04510_7  | 2.62E-09 |
| SP1    | path:04110_1  | 2.95E-09 |
| SP1    | path:05200_30 | 3.09E-09 |
| SPI1   | path:04670_4  | 3.21E-09 |
| SPI1   | path:04670_9  | 3.21E-09 |
| SPI1   | path:04670_8  | 3.21E-09 |
| STAT3  | path:05200_35 | 6.34E-09 |
| SP1    | path:05200_18 | 6.86E-09 |
| TP53   | path:04110_7  | 7.23E-09 |
| TP53   | path:04110_1  | 7.85E-09 |
| HNF4A  | path:04610_2  | 9.43E-09 |
| FOS    | path:05200_37 | 1.26E-08 |
| PAX6   | path:04510_6  | 1.43E-08 |
| PAX6   | path:04510_5  | 1.43E-08 |
| PAX6   | path:04510_7  | 1.43E-08 |
| TCF7L2 | path:04310_7  | 1.48E-08 |
| SP3    | path:04512_3  | 1.62E-08 |
| SP3    | path:04110_5  | 1.76E-08 |
| NR5A1  | path:00140_1  | 1.80E-08 |
| JUND   | path:05200_35 | 1.90E-08 |
| SP1    | path:04610_2  | 2.04E-08 |
| HNF4A  | path:03320_1  | 2.34E-08 |
| TP53   | path:04110_11 | 2.42E-08 |
| FOS    | path:05200_35 | 2.43E-08 |
| FOS    | path:05200_39 | 2.43E-08 |
| TCF7L2 | path:04310_5  | 3.41E-08 |
| FOS    | path:05200_25 | 3.44E-08 |
| SP1    | path:05219_3  | 3.46E-08 |
| SP1    | path:04510_4  | 3.46E-08 |

|        |               |          |
|--------|---------------|----------|
| E2F1   | path:05212_9  | 4.00E-08 |
| NFYA   | path:04110_2  | 4.19E-08 |
| NFYA   | path:04110_7  | 4.19E-08 |
| ZBTB7A | path:04110_13 | 4.99E-08 |
| E2F1   | path:04110_2  | 5.15E-08 |
| E2F1   | path:05219_5  | 5.40E-08 |
| ZBTB7A | path:04110_11 | 6.29E-08 |
| SP3    | path:05200_38 | 6.30E-08 |
| TP53   | path:05200_2  | 6.35E-08 |
| E2F1   | path:04110_7  | 6.37E-08 |
| RELA   | path:04062_1  | 6.41E-08 |
| SP3    | path:04110_11 | 6.86E-08 |
| EGR1   | path:04510_13 | 8.03E-08 |
| SP1    | path:00140_1  | 8.25E-08 |
| SP1    | path:04610_4  | 8.54E-08 |
| SP3    | path:04110_1  | 8.54E-08 |
| SP1    | path:04610_6  | 8.72E-08 |
| E2F1   | path:05200_37 | 9.41E-08 |
| E2F1   | path:05214_3  | 9.41E-08 |
| E2F1   | path:05220_4  | 9.41E-08 |
| SP3    | path:00140_1  | 9.88E-08 |
| SP1    | path:04510_12 | 1.03E-07 |
| HNF4A  | path:04610_1  | 1.04E-07 |
| HNF4A  | path:04610_3  | 1.04E-07 |
| MYC    | path:05200_24 | 1.07E-07 |
| HNF4A  | path:04610_5  | 1.07E-07 |
| SP1    | path:04610_1  | 1.15E-07 |
| SP1    | path:04610_3  | 1.15E-07 |
| SP3    | path:05200_37 | 1.26E-07 |
| SPI1   | path:04670_2  | 1.42E-07 |
| STAT3  | path:04630_2  | 1.47E-07 |
| STAT3  | path:05200_38 | 1.47E-07 |
| RELA   | path:04620_9  | 1.53E-07 |
| RELA   | path:04062_2  | 1.59E-07 |
| RELA   | path:04620_6  | 1.59E-07 |
| RELA   | path:04620_8  | 1.59E-07 |
| SP3    | path:04110_10 | 1.67E-07 |
| SP3    | path:04110_13 | 1.71E-07 |
| SP3    | path:04110_9  | 1.71E-07 |
| RELA   | path:04620_5  | 1.79E-07 |
| E2F1   | path:04110_13 | 2.09E-07 |
| IRF1   | path:04620_3  | 2.19E-07 |
| SP3    | path:05200_25 | 2.20E-07 |
| SPI1   | path:04670_6  | 2.26E-07 |

|        |               |          |
|--------|---------------|----------|
| SPI1   | path:04145_4  | 2.26E-07 |
| IRF1   | path:04620_1  | 2.40E-07 |
| STAT3  | path:05200_39 | 2.52E-07 |
| SP3    | path:04512_2  | 2.81E-07 |
| IRF3   | path:04620_7  | 2.93E-07 |
| IRF3   | path:04620_2  | 2.93E-07 |
| IRF7   | path:04620_7  | 2.93E-07 |
| IRF7   | path:04620_2  | 2.93E-07 |
| TP53   | path:05219_3  | 3.10E-07 |
| SP1    | path:05219_5  | 3.24E-07 |
| TP53   | path:05200_10 | 3.31E-07 |
| TP53   | path:05200_7  | 3.31E-07 |
| JUND   | path:05200_38 | 3.69E-07 |
| PAX6   | path:04510_4  | 4.20E-07 |
| AKNA   | path:04060_18 | 4.33E-07 |
| AKNA   | path:04514_8  | 4.33E-07 |
| AKNA   | path:04672_2  | 4.33E-07 |
| AKNA   | path:05144_4  | 4.33E-07 |
| AKNA   | path:05145_14 | 4.33E-07 |
| AKNA   | path:05310_1  | 4.33E-07 |
| AKNA   | path:05320_1  | 4.33E-07 |
| AKNA   | path:05322_3  | 4.33E-07 |
| AKNA   | path:05330_1  | 4.33E-07 |
| AKNA   | path:05416_3  | 4.33E-07 |
| PAX6   | path:04512_3  | 4.42E-07 |
| E2F1   | path:05223_3  | 4.42E-07 |
| MITF   | path:04916_8  | 4.58E-07 |
| MITF   | path:04916_3  | 4.58E-07 |
| MITF   | path:04916_6  | 4.58E-07 |
| FOS    | path:05200_38 | 4.60E-07 |
| JUND   | path:05200_39 | 5.05E-07 |
| E2F1   | path:05200_38 | 5.19E-07 |
| SP1    | path:05200_6  | 5.48E-07 |
| JUND   | path:05200_25 | 6.49E-07 |
| E2F1   | path:05222_1  | 6.50E-07 |
| RFX3   | path:04514_19 | 6.68E-07 |
| RFX3   | path:04612_3  | 6.68E-07 |
| NFYA   | path:04110_5  | 6.77E-07 |
| NFE2L2 | path:00480_1  | 7.00E-07 |
| E2F1   | path:05200_39 | 8.31E-07 |
| TP53   | path:05200_9  | 8.31E-07 |
| SP1    | path:05215_9  | 8.52E-07 |
| SP3    | path:04510_14 | 8.76E-07 |
| SP3    | path:04510_1  | 9.07E-07 |

|        |               |          |
|--------|---------------|----------|
| TP53   | path:05218_3  | 9.47E-07 |
| HNF4A  | path:00982_2  | 9.51E-07 |
| TP53   | path:05200_19 | 1.03E-06 |
| TP53   | path:05200_15 | 1.09E-06 |
| TP53   | path:05200_39 | 1.15E-06 |
| STAT3  | path:05200_24 | 1.17E-06 |
| SP3    | path:05214_3  | 1.25E-06 |
| SP3    | path:05220_4  | 1.25E-06 |
| SP3    | path:05200_15 | 1.36E-06 |
| RBPJ   | path:04620_3  | 1.51E-06 |
| SP3    | path:05200_35 | 1.52E-06 |
| TP53   | path:05214_3  | 1.52E-06 |
| TP53   | path:05220_4  | 1.52E-06 |
| SP1    | path:05218_3  | 1.57E-06 |
| NFYA   | path:04110_1  | 1.59E-06 |
| TP53   | path:05200_25 | 1.66E-06 |
| RFX2   | path:04514_19 | 1.67E-06 |
| RFX2   | path:04612_3  | 1.67E-06 |
| SPI1   | path:05140_3  | 1.97E-06 |
| JUND   | path:05200_37 | 2.04E-06 |
| PAX6   | path:04510_14 | 2.11E-06 |
| PAX6   | path:04510_1  | 2.11E-06 |
| SP1    | path:05218_5  | 2.17E-06 |
| SP1    | path:05222_1  | 2.17E-06 |
| SPI1   | path:05140_2  | 2.40E-06 |
| TCF7L2 | path:05216_3  | 2.45E-06 |
| TFAP2A | path:05200_10 | 2.50E-06 |
| E2F1   | path:05218_5  | 2.80E-06 |
| RELA   | path:05200_37 | 2.84E-06 |
| SP1    | path:04610_5  | 2.91E-06 |
| PAX6   | path:05414_2  | 3.01E-06 |
| CEBPA  | path:04610_4  | 3.03E-06 |
| SP1    | path:04144_2  | 3.05E-06 |
| YY1    | path:04110_5  | 3.50E-06 |
| SP1    | path:04630_2  | 3.87E-06 |
| HNF4A  | path:04610_4  | 4.06E-06 |
| IRF1   | path:04620_7  | 4.18E-06 |
| SP1    | path:05200_9  | 4.33E-06 |
| E2F1   | path:05219_3  | 4.92E-06 |
| SP1    | path:05210_8  | 4.93E-06 |
| SP1    | path:04110_2  | 5.26E-06 |
| TFAP2A | path:05200_19 | 5.35E-06 |
| YY1    | path:04110_1  | 5.46E-06 |
| ESR1   | path:05200_39 | 5.64E-06 |

|        |               |          |
|--------|---------------|----------|
| ESR1   | path:05200_25 | 5.64E-06 |
| TP53   | path:05200_37 | 6.13E-06 |
| SP1    | path:05200_33 | 6.48E-06 |
| TFAP2A | path:05200_17 | 6.90E-06 |
| SP1    | path:04310_7  | 6.94E-06 |
| SP1    | path:05212_9  | 6.94E-06 |
| TCF7L2 | path:05213_1  | 7.20E-06 |
| TCF7L2 | path:05210_8  | 7.48E-06 |
| SP1    | path:05210_5  | 7.71E-06 |
| SP1    | path:05218_1  | 7.86E-06 |
| TCF7L2 | path:05210_5  | 7.93E-06 |
| TFAP2A | path:05200_30 | 8.21E-06 |
| TFAP2A | path:04510_12 | 8.21E-06 |
| TFAP2A | path:05200_24 | 8.32E-06 |
| TP53   | path:05215_9  | 9.26E-06 |
| RFX1   | path:04514_19 | 9.33E-06 |
| RFX1   | path:04612_3  | 9.33E-06 |
| SP3    | path:05219_3  | 9.51E-06 |
| SP1    | path:04310_5  | 9.60E-06 |
| SP1    | path:05218_2  | 9.93E-06 |
| SP1    | path:04110_7  | 1.01E-05 |
| RELA   | path:05200_39 | 1.03E-05 |
| NFYA   | path:04110_11 | 1.08E-05 |
| ZBTB7A | path:05200_26 | 1.08E-05 |
| TP53   | path:04110_6  | 1.13E-05 |
| REL    | path:04650_5  | 1.13E-05 |
| CEBPB  | path:04620_9  | 1.18E-05 |
| CEBPB  | path:04060_38 | 1.18E-05 |
| CEBPB  | path:04620_6  | 1.18E-05 |
| CEBPB  | path:04620_8  | 1.18E-05 |
| CEBPB  | path:04620_5  | 1.18E-05 |
| AR     | path:04115_2  | 1.25E-05 |
| TCF7L2 | path:05221_2  | 1.27E-05 |
| TFAP2A | path:05200_7  | 1.38E-05 |
| SP1    | path:05200_14 | 1.45E-05 |
| ESR1   | path:05200_37 | 1.47E-05 |
| TP53   | path:05215_10 | 1.51E-05 |
| LEF1   | path:05216_3  | 1.52E-05 |
| SP1    | path:05414_2  | 1.55E-05 |
| IRF3   | path:04060_23 | 1.58E-05 |
| IRF7   | path:04060_23 | 1.58E-05 |
| RELA   | path:05200_25 | 1.61E-05 |
| NFYA   | path:04110_10 | 1.65E-05 |
| NFYA   | path:04110_9  | 1.65E-05 |



|        |               |          |
|--------|---------------|----------|
| RELA   | path:04620_7  | 1.66E-05 |
| HNF4A  | path:00830_1  | 1.68E-05 |
| SMAD2  | path:04512_3  | 1.70E-05 |
| SMAD2  | path:04512_1  | 1.70E-05 |
| SP1    | path:05223_3  | 1.76E-05 |
| ZBTB7A | path:05200_38 | 1.83E-05 |
| ZBTB7A | path:05200_18 | 1.83E-05 |
| ZBTB7A | path:05200_15 | 1.83E-05 |
| ZBTB7A | path:05200_35 | 1.83E-05 |
| ZBTB7A | path:05200_39 | 1.83E-05 |
| ZBTB7A | path:04110_10 | 1.83E-05 |
| ZBTB7A | path:04110_9  | 1.83E-05 |
| TCF7   | path:04660_15 | 1.83E-05 |
| ZBTB7A | path:05200_25 | 1.85E-05 |
| TP53   | path:05200_13 | 1.99E-05 |
| NFYA   | path:04115_2  | 2.03E-05 |
| E2F1   | path:05215_3  | 2.19E-05 |
| NR5A2  | path:00140_1  | 2.25E-05 |
| MYC    | path:04110_13 | 2.37E-05 |
| MYC    | path:05200_38 | 2.42E-05 |
| MYC    | path:04110_11 | 2.42E-05 |
| MYC    | path:05200_35 | 2.42E-05 |
| MYC    | path:05200_39 | 2.42E-05 |
| MYC    | path:05222_5  | 2.42E-05 |
| MYC    | path:04110_10 | 2.42E-05 |
| MYC    | path:04110_9  | 2.42E-05 |
| SP1    | path:05222_2  | 2.43E-05 |
| LEF1   | path:05213_1  | 2.46E-05 |
| LEF1   | path:05210_8  | 2.46E-05 |
| LEF1   | path:05210_5  | 2.46E-05 |
| MYC    | path:05200_25 | 2.50E-05 |
| POU2F1 | path:00830_1  | 2.52E-05 |
| HNF4A  | path:00980_1  | 2.54E-05 |
| SP1    | path:05142_3  | 2.58E-05 |
| IRF5   | path:04620_3  | 2.94E-05 |
| IRF5   | path:04620_1  | 2.94E-05 |
| JUN    | path:05200_37 | 3.15E-05 |
| JUN    | path:04620_9  | 3.15E-05 |
| JUN    | path:04620_6  | 3.15E-05 |
| JUN    | path:04620_8  | 3.15E-05 |
| JUN    | path:04620_5  | 3.15E-05 |
| JUN    | path:04650_3  | 3.15E-05 |
| JUN    | path:05200_35 | 3.15E-05 |
| JUN    | path:05200_39 | 3.15E-05 |

|        |               |          |
|--------|---------------|----------|
| IRF3   | path:04620_9  | 3.21E-05 |
| IRF7   | path:04620_9  | 3.21E-05 |
| SP3    | path:05219_5  | 3.24E-05 |
| ZBTB7A | path:05200_37 | 3.34E-05 |
| TFAP2A | path:05200_8  | 3.34E-05 |
| IRF5   | path:04620_4  | 3.43E-05 |
| SP1    | path:04610_7  | 3.53E-05 |
| SP1    | path:04510_16 | 3.54E-05 |
| SP1    | path:04350_1  | 3.54E-05 |
| IRF3   | path:04650_5  | 3.56E-05 |
| IRF3   | path:04650_3  | 3.56E-05 |
| IRF7   | path:04650_5  | 3.56E-05 |
| IRF7   | path:04650_3  | 3.56E-05 |
| ATF2   | path:05200_35 | 3.57E-05 |
| ATF2   | path:04620_9  | 3.57E-05 |
| ATF2   | path:04620_6  | 3.57E-05 |
| ATF2   | path:04620_8  | 3.57E-05 |
| ATF2   | path:04620_5  | 3.57E-05 |
| SMAD2  | path:04510_14 | 3.63E-05 |
| SMAD2  | path:04510_1  | 3.63E-05 |
| SMAD2  | path:04510_6  | 3.63E-05 |
| SMAD2  | path:04510_5  | 3.63E-05 |
| SMAD2  | path:04510_7  | 3.63E-05 |
| TFAP2A | path:05200_38 | 3.67E-05 |
| TFAP2A | path:05200_9  | 3.67E-05 |
| LEF1   | path:05221_2  | 3.67E-05 |
| TFAP2A | path:05200_6  | 3.69E-05 |
| SMAD4  | path:05200_38 | 3.71E-05 |
| SMAD4  | path:05200_35 | 3.71E-05 |
| SMAD4  | path:05200_39 | 3.71E-05 |
| ATF2   | path:05200_37 | 3.80E-05 |
| SMAD4  | path:05200_25 | 3.97E-05 |
| NFATC2 | path:04060_4  | 4.21E-05 |
| CEBPB  | path:04620_3  | 4.26E-05 |
| SREBF1 | path:04910_4  | 4.39E-05 |
| SP1    | path:04210_9  | 4.41E-05 |
| PAX6   | path:04510_3  | 4.51E-05 |
| YY1    | path:04110_10 | 4.51E-05 |
| YY1    | path:04110_9  | 4.51E-05 |
| SP1    | path:04810_16 | 4.56E-05 |
| TFAP2A | path:05200_35 | 4.58E-05 |
| TFAP2A | path:05200_39 | 4.58E-05 |
| RBPJ   | path:04620_9  | 4.66E-05 |
| RBPJ   | path:04620_6  | 4.66E-05 |

|        |               |          |
|--------|---------------|----------|
| RBPJ   | path:04620_5  | 4.66E-05 |
| RBPJ   | path:05215_4  | 4.66E-05 |
| JUN    | path:05200_25 | 4.74E-05 |
| CEBPB  | path:05200_37 | 4.78E-05 |
| CEBPB  | path:04620_1  | 4.78E-05 |
| TP53   | path:05218_5  | 4.87E-05 |
| PAX6   | path:04510_16 | 4.93E-05 |
| PAX6   | path:04810_16 | 4.93E-05 |
| E2F1   | path:05200_15 | 4.94E-05 |
| MYC    | path:05222_1  | 5.00E-05 |
| E2F1   | path:05200_35 | 5.08E-05 |
| MYC    | path:05200_37 | 5.15E-05 |
| GATA4  | path:00980_1  | 5.16E-05 |
| SP1    | path:05200_19 | 5.29E-05 |
| FLI1   | path:04512_1  | 5.32E-05 |
| TCF7L2 | path:05200_34 | 5.33E-05 |
| TFAP2A | path:05200_2  | 5.56E-05 |
| HNF1A  | path:00140_1  | 5.73E-05 |
| IRF3   | path:05160_4  | 5.84E-05 |
| IRF7   | path:05160_4  | 5.84E-05 |
| LEF1   | path:04916_8  | 5.97E-05 |
| YY1    | path:05219_3  | 6.00E-05 |
| YY1    | path:04650_5  | 6.00E-05 |
| TFAP2A | path:05200_25 | 6.16E-05 |
| STAT3  | path:05200_21 | 6.16E-05 |
| SP1    | path:04912_7  | 6.23E-05 |
| TCF7L2 | path:05200_21 | 6.50E-05 |
| NR1I3  | path:00830_1  | 6.80E-05 |
| NR1I3  | path:00980_1  | 6.80E-05 |
| SP1    | path:05215_7  | 6.88E-05 |
| E2F1   | path:05200_25 | 6.91E-05 |
| SP1    | path:05218_4  | 6.99E-05 |
| ZBTB7A | path:05219_3  | 7.00E-05 |
| TCF7L2 | path:05200_26 | 7.09E-05 |
| SP1    | path:05200_10 | 7.15E-05 |
| E2F1   | path:04115_2  | 7.56E-05 |
| LEF1   | path:04916_3  | 7.73E-05 |
| LEF1   | path:04916_6  | 7.73E-05 |
| PAX6   | path:04512_1  | 7.80E-05 |
| SMAD4  | path:05200_37 | 7.85E-05 |
| ATF2   | path:04620_3  | 8.14E-05 |
| ATF2   | path:04110_13 | 8.73E-05 |
| ATF2   | path:04620_1  | 8.73E-05 |
| SMAD2  | path:04110_13 | 8.76E-05 |

|        |               |          |
|--------|---------------|----------|
| KLF4   | path:04110_11 | 8.78E-05 |
| KLF4   | path:04110_10 | 8.78E-05 |
| KLF4   | path:04110_9  | 8.78E-05 |
| KLF4   | path:04110_5  | 8.78E-05 |
| SMAD3  | path:05200_38 | 8.80E-05 |
| SMAD3  | path:05200_35 | 8.80E-05 |
| SMAD3  | path:05200_39 | 8.80E-05 |
| JUN    | path:04620_3  | 8.92E-05 |
| RELA   | path:04670_2  | 8.94E-05 |
| SP3    | path:04510_12 | 8.95E-05 |
| SP1    | path:04350_4  | 8.96E-05 |
| TP53   | path:05219_5  | 9.08E-05 |
| TP53   | path:05200_21 | 9.08E-05 |
| TP53   | path:05218_1  | 9.08E-05 |
| IRF1   | path:04620_9  | 9.08E-05 |
| HNF1A  | path:00980_1  | 9.37E-05 |
| HNF1A  | path:04610_2  | 9.37E-05 |
| SMAD3  | path:05200_25 | 9.41E-05 |
| RELA   | path:04060_44 | 9.57E-05 |
| TP53   | path:05200_16 | 9.68E-05 |
| TP53   | path:05218_2  | 9.68E-05 |
| LEF1   | path:05200_34 | 9.78E-05 |
| MITF   | path:00350_1  | 9.86E-05 |
| SP1    | path:05200_16 | 0.000101 |
| SP1    | path:05142_11 | 0.000101 |
| SP1    | path:05222_5  | 0.000101 |
| TP53   | path:05200_26 | 0.000106 |
| CEBPB  | path:04620_4  | 0.000108 |
| ZBTB7A | path:05219_5  | 0.000111 |
| TP63   | path:04110_10 | 0.000112 |
| TP63   | path:04110_9  | 0.000112 |
| TP63   | path:04110_5  | 0.000112 |
| TP63   | path:04115_2  | 0.000112 |
| TP53   | path:05200_24 | 0.000117 |
| RBPJ   | path:04620_1  | 0.000117 |
| RELA   | path:05200_38 | 0.00012  |
| LEF1   | path:05200_21 | 0.000121 |
| JUN    | path:04620_1  | 0.000121 |
| FUS    | path:00230_2  | 0.000121 |
| RUNX3  | path:04612_4  | 0.000121 |
| SP3    | path:05218_5  | 0.000125 |
| TFAP2A | path:04510_13 | 0.000127 |
| TXK    | path:04612_5  | 0.00013  |
| CEBPA  | path:04610_1  | 0.000131 |

|        |               |          |
|--------|---------------|----------|
| CEBPA  | path:04610_3  | 0.000131 |
| POU2F1 | path:04110_11 | 0.000132 |
| LEF1   | path:05200_26 | 0.000133 |
| STAT4  | path:04630_2  | 0.000135 |
| TP63   | path:04110_1  | 0.000135 |
| TFAP2A | path:04510_4  | 0.000135 |
| PAX6   | path:05100_6  | 0.00014  |
| E2F1   | path:05200_33 | 0.00014  |
| POU2F1 | path:04110_10 | 0.000141 |
| POU2F1 | path:04110_9  | 0.000141 |
| FUS    | path:00230_3  | 0.000143 |
| ZBTB7A | path:05214_3  | 0.000149 |
| ZBTB7A | path:05220_4  | 0.000149 |
| KLF4   | path:04110_1  | 0.000149 |
| SP3    | path:04510_4  | 0.000151 |
| IRF2   | path:04620_4  | 0.000151 |
| ESR1   | path:04115_2  | 0.000152 |
| CEBPA  | path:04610_2  | 0.000156 |
| TFAP2A | path:05200_37 | 0.000157 |
| SP1    | path:05215_10 | 0.000161 |
| SMAD3  | path:05200_37 | 0.000164 |
| SMAD3  | path:04512_3  | 0.000164 |
| SMAD3  | path:04512_1  | 0.000164 |
| ATF2   | path:04620_4  | 0.000164 |
| ATF2   | path:05200_38 | 0.000164 |
| PAX6   | path:04514_5  | 0.000167 |
| NFATC2 | path:05142_11 | 0.000171 |
| HIF1A  | path:05200_37 | 0.000173 |
| ETV4   | path:05200_37 | 0.000176 |
| STAT5A | path:04630_2  | 0.000194 |
| STAT5B | path:04630_2  | 0.000194 |
| RBPJ   | path:05200_13 | 0.000198 |
| ZBTB7A | path:05222_5  | 0.000199 |
| RELA   | path:05200_35 | 0.000203 |
| YY1    | path:05214_3  | 0.000204 |
| YY1    | path:05220_4  | 0.000204 |
| YY1    | path:04110_13 | 0.000204 |
| E2F1   | path:05223_4  | 0.000204 |
| SP3    | path:05200_13 | 0.00021  |
| NFYA   | path:04110_6  | 0.000211 |
| GATA4  | path:00591_1  | 0.000213 |
| TCF7L2 | path:05200_38 | 0.000217 |
| RBPJ   | path:05200_15 | 0.000219 |
| TP53   | path:04110_13 | 0.00022  |

|        |               |          |
|--------|---------------|----------|
| AR     | path:05200_35 | 0.000223 |
| AR     | path:04110_10 | 0.000223 |
| AR     | path:05200_25 | 0.000223 |
| E2F1   | path:05218_3  | 0.000224 |
| TP73   | path:04115_2  | 0.000225 |
| TFAP2A | path:04144_2  | 0.000225 |
| SP1    | path:05200_20 | 0.000225 |
| TCF7L2 | path:05200_18 | 0.000226 |
| TCF7L2 | path:05200_15 | 0.000226 |
| TCF7L2 | path:05200_35 | 0.000226 |
| TCF7L2 | path:05200_39 | 0.000226 |
| TP63   | path:05219_3  | 0.000227 |
| SMAD2  | path:04110_10 | 0.00023  |
| MYC    | path:05200_21 | 0.000231 |
| TP53   | path:05215_6  | 0.000236 |
| LEF1   | path:04310_7  | 0.000237 |
| PAX6   | path:04514_17 | 0.000238 |
| ATF2   | path:05200_39 | 0.00024  |
| SP1    | path:05145_8  | 0.000243 |
| SP1    | path:05216_3  | 0.000243 |
| SP1    | path:04620_9  | 0.000245 |
| PAX6   | path:04510_13 | 0.000245 |
| NR2F1  | path:03320_1  | 0.00025  |
| ATF2   | path:04110_10 | 0.000256 |
| SP1    | path:04350_5  | 0.00026  |
| ATF2   | path:05142_3  | 0.00026  |
| STAT1  | path:04620_9  | 0.00026  |
| FOSL1  | path:05200_35 | 0.000264 |
| RELA   | path:04650_5  | 0.000265 |
| STAT3  | path:05210_8  | 0.000265 |
| SMAD2  | path:04512_2  | 0.000267 |
| REL    | path:04650_15 | 0.000267 |
| HNF4A  | path:04610_7  | 0.000271 |
| ATF2   | path:05200_25 | 0.000272 |
| TCF7L2 | path:05200_25 | 0.000276 |
| SP3    | path:05200_21 | 0.000277 |
| SP3    | path:05200_18 | 0.000277 |
| JUN    | path:04620_4  | 0.00028  |
| HNF4A  | path:00591_1  | 0.000287 |
| JUN    | path:05200_38 | 0.000287 |
| NR5A1  | path:04060_2  | 0.000292 |
| TP53   | path:04722_15 | 0.000295 |
| SP1    | path:04010_6  | 0.000298 |
| REL    | path:04650_14 | 0.000298 |

|        |               |          |
|--------|---------------|----------|
| STAT3  | path:05210_5  | 0.000303 |
| STAT1  | path:05200_26 | 0.000314 |
| STAT1  | path:05200_24 | 0.000314 |
| TP53   | path:05200_14 | 0.000326 |
| RELA   | path:04115_2  | 0.00033  |
| TP63   | path:05219_5  | 0.000334 |
| POU2F1 | path:05200_37 | 0.000343 |
| POU2F1 | path:05200_26 | 0.000343 |
| STAT3  | path:04060_1  | 0.000344 |
| REL    | path:04650_13 | 0.000347 |
| SP3    | path:05223_3  | 0.000351 |
| SP3    | path:05200_26 | 0.000352 |
| TFAP2A | path:05215_9  | 0.000358 |
| SMAD4  | path:05200_30 | 0.000358 |
| SMAD4  | path:05200_26 | 0.000358 |
| SMAD4  | path:05200_24 | 0.000358 |
| SMAD4  | path:04510_13 | 0.000361 |
| RELA   | path:04110_2  | 0.000367 |
| ZBTB7A | path:05222_1  | 0.000368 |
| STAT3  | path:05200_18 | 0.000368 |
| STAT3  | path:05200_15 | 0.000368 |
| TP53   | path:05200_8  | 0.000369 |
| TP53   | path:05214_2  | 0.000369 |
| LEF1   | path:05200_38 | 0.000377 |
| ESR1   | path:05200_24 | 0.000378 |
| E2F1   | path:04110_4  | 0.000379 |
| LEF1   | path:05200_18 | 0.000387 |
| LEF1   | path:05200_15 | 0.000387 |
| LEF1   | path:04310_5  | 0.000387 |
| LEF1   | path:05200_35 | 0.000387 |
| LEF1   | path:05200_39 | 0.000387 |
| EGR1   | path:04510_12 | 0.000387 |
| EGR1   | path:04510_6  | 0.000387 |
| EGR1   | path:04510_7  | 0.000387 |
| EGR1   | path:05200_30 | 0.000387 |
| SPI1   | path:04620_4  | 0.000394 |
| GATA4  | path:00982_2  | 0.000395 |
| TP63   | path:05214_3  | 0.000397 |
| TP63   | path:05220_4  | 0.000397 |
| SP3    | path:05200_24 | 0.000398 |
| SP1    | path:05014_2  | 0.000401 |
| SP1    | path:05140_4  | 0.000401 |
| SP1    | path:05146_1  | 0.000401 |
| STAT3  | path:05142_3  | 0.000403 |

|        |               |          |
|--------|---------------|----------|
| E2F1   | path:05200_21 | 0.000404 |
| STAT1  | path:04630_2  | 0.000411 |
| CEBPB  | path:04062_2  | 0.000413 |
| ELF1   | path:04060_1  | 0.000415 |
| EGR1   | path:05200_24 | 0.000415 |
| FOXA2  | path:04610_4  | 0.000416 |
| FOXA2  | path:04610_1  | 0.000416 |
| FOXA2  | path:04610_3  | 0.000416 |
| FOXA2  | path:04610_5  | 0.000416 |
| FOXA2  | path:04610_2  | 0.000416 |
| SP3    | path:05200_2  | 0.000419 |
| AR     | path:05200_37 | 0.00044  |
| ATF2   | path:04350_4  | 0.000443 |
| SP1    | path:00330_4  | 0.000448 |
| SP1    | path:05200_31 | 0.000448 |
| SP1    | path:05200_34 | 0.000448 |
| NRL    | path:04744_2  | 0.000455 |
| YY1    | path:04110_11 | 0.000455 |
| SP1    | path:00980_1  | 0.000468 |
| SPI1   | path:04060_26 | 0.000468 |
| SMAD4  | path:04110_13 | 0.000472 |
| SP1    | path:05215_6  | 0.000473 |
| E2F1   | path:05200_26 | 0.000474 |
| LEF1   | path:05200_25 | 0.000477 |
| TP53   | path:05200_6  | 0.000487 |
| TP53   | path:05214_1  | 0.000487 |
| YBX1   | path:05218_1  | 0.000487 |
| YBX1   | path:05218_2  | 0.000487 |
| YBX1   | path:04520_2  | 0.000487 |
| EGR1   | path:04350_5  | 0.000503 |
| RELA   | path:04110_7  | 0.000506 |
| TCF7L2 | path:05200_37 | 0.00051  |
| TFAP2A | path:05214_2  | 0.000513 |
| TFAP2A | path:05215_10 | 0.000513 |
| SP3    | path:04610_6  | 0.000519 |
| SP1    | path:00330_3  | 0.000536 |
| SMAD3  | path:05200_30 | 0.000539 |
| SMAD3  | path:05200_26 | 0.000539 |
| SMAD3  | path:05200_24 | 0.000539 |
| TXK    | path:04650_15 | 0.000546 |
| TXK    | path:05142_3  | 0.000546 |
| TXK    | path:04650_14 | 0.000546 |
| TXK    | path:04350_4  | 0.000546 |
| TXK    | path:04650_13 | 0.000548 |



|        |               |          |
|--------|---------------|----------|
| SMAD3  | path:04510_14 | 0.000554 |
| SMAD3  | path:04510_1  | 0.000554 |
| SMAD3  | path:04510_6  | 0.000554 |
| SMAD3  | path:04510_5  | 0.000554 |
| SMAD3  | path:04510_7  | 0.000554 |
| SMAD3  | path:04110_13 | 0.000554 |
| RELA   | path:04110_1  | 0.000556 |
| YY1    | path:05200_15 | 0.000557 |
| YY1    | path:05200_39 | 0.000557 |
| SP3    | path:04144_2  | 0.000562 |
| SP3    | path:04115_2  | 0.000569 |
| JUN    | path:04650_5  | 0.00058  |
| STAT1  | path:05210_8  | 0.000581 |
| KLF5   | path:05210_8  | 0.000591 |
| KLF5   | path:05210_5  | 0.000591 |
| STAT1  | path:05210_5  | 0.000599 |
| STAT1  | path:05200_38 | 0.000599 |
| STAT1  | path:05200_18 | 0.000608 |
| STAT1  | path:05200_15 | 0.000608 |
| STAT1  | path:05200_35 | 0.000608 |
| STAT1  | path:05200_39 | 0.000608 |
| SP1    | path:05140_6  | 0.000608 |
| YBX1   | path:04510_19 | 0.000611 |
| YBX1   | path:04520_5  | 0.000616 |
| YBX1   | path:05200_8  | 0.000616 |
| YBX1   | path:04520_3  | 0.000616 |
| YBX1   | path:04520_7  | 0.000616 |
| YBX1   | path:04520_6  | 0.000616 |
| JUN    | path:04210_9  | 0.000629 |
| GATA4  | path:00590_2  | 0.000641 |
| GATA4  | path:00590_1  | 0.000641 |
| SP1    | path:00330_5  | 0.000643 |
| VDR    | path:05200_16 | 0.000645 |
| POU2F1 | path:04110_13 | 0.000647 |
| TXK    | path:04650_5  | 0.000651 |
| PAX6   | path:05100_7  | 0.000652 |
| SP3    | path:04060_20 | 0.000657 |
| KLF4   | path:05200_21 | 0.000676 |
| TFAP2A | path:05214_1  | 0.000681 |
| ZBTB7A | path:05218_3  | 0.000683 |
| TFAP2A | path:05215_8  | 0.000684 |
| YBX1   | path:05218_4  | 0.000697 |
| ELF1   | path:04664_6  | 0.000698 |
| ZBTB7A | path:05218_5  | 0.000702 |

|        |               |          |
|--------|---------------|----------|
| POU2F1 | path:05222_5  | 0.000715 |
| YY1    | path:05200_25 | 0.00073  |
| VDR    | path:05200_10 | 0.000744 |
| JUN    | path:04115_2  | 0.000753 |
| YY1    | path:04115_2  | 0.000773 |
| NR4A1  | path:00140_1  | 0.000776 |
| XBP1   | path:04514_19 | 0.000779 |
| XBP1   | path:04612_3  | 0.000779 |
| STAT1  | path:05200_25 | 0.000791 |
| FOS    | path:04670_2  | 0.000797 |
| YY1    | path:04110_2  | 0.000819 |
| SP1    | path:04510_3  | 0.000821 |
| TP53   | path:05200_17 | 0.000849 |
| RBPJ   | path:05140_5  | 0.000876 |
| RBPJ   | path:05215_2  | 0.000876 |
| STAT5B | path:04630_1  | 0.000879 |
| STAT5B | path:05200_38 | 0.000879 |
| STAT5B | path:05200_35 | 0.000879 |
| STAT5B | path:05200_39 | 0.000879 |
| LEF1   | path:05200_37 | 0.000889 |
| CEBPB  | path:05200_20 | 0.000891 |
| ZBTB7A | path:04110_4  | 0.000895 |
| SP3    | path:05200_33 | 0.000897 |
| STAT5A | path:04630_1  | 0.000897 |
| CREB1  | path:05142_3  | 0.0009   |
| ATF2   | path:04650_5  | 0.00091  |
| ZBTB7A | path:05200_21 | 0.000913 |
| STAT5B | path:05200_25 | 0.000954 |
| EGR1   | path:05020_2  | 0.000955 |
| SMAD4  | path:05200_18 | 0.000956 |
| SMAD4  | path:05200_15 | 0.000956 |
| SMAD4  | path:05218_4  | 0.000956 |
| CEBPB  | path:04062_1  | 0.00096  |
| ATF2   | path:04650_3  | 0.000962 |
| RBPJ   | path:04210_3  | 0.000973 |
| ELF1   | path:04664_1  | 0.000987 |
| RBPJ   | path:05120_4  | 0.000987 |
| RBPJ   | path:05160_12 | 0.000987 |
| SMAD4  | path:04110_10 | 0.000989 |
| SP3    | path:05212_9  | 0.000994 |
| VDR    | path:05200_19 | 0.001009 |
| STAT5B | path:05219_3  | 0.001012 |
| TXK    | path:04350_5  | 0.001014 |
| TXK    | path:04350_1  | 0.001014 |

|        |               |          |
|--------|---------------|----------|
| POU2F1 | path:05200_38 | 0.001025 |
| POU2F1 | path:00590_2  | 0.001025 |
| POU2F1 | path:05200_18 | 0.001025 |
| POU2F1 | path:00590_1  | 0.001025 |
| POU2F1 | path:05200_15 | 0.001025 |
| POU2F1 | path:05222_1  | 0.001025 |
| POU2F1 | path:05200_35 | 0.001025 |
| POU2F1 | path:05200_39 | 0.001025 |
| STAT6  | path:04630_2  | 0.001034 |
| TFAP2A | path:05219_2  | 0.001046 |
| ZBTB7A | path:05200_24 | 0.001054 |
| RBPJ   | path:05120_2  | 0.001071 |
| RBPJ   | path:04623_2  | 0.001071 |
| RBPJ   | path:04623_4  | 0.001071 |
| RBPJ   | path:04660_1  | 0.001071 |
| RBPJ   | path:04210_6  | 0.001071 |
| RBPJ   | path:05145_4  | 0.001071 |
| RBPJ   | path:04620_12 | 0.001071 |
| RBPJ   | path:05120_1  | 0.001071 |
| RBPJ   | path:05120_7  | 0.001071 |
| RBPJ   | path:05160_2  | 0.001071 |
| RBPJ   | path:05222_8  | 0.001071 |
| RBPJ   | path:04210_5  | 0.001071 |
| RBPJ   | path:04622_2  | 0.001071 |
| RBPJ   | path:05120_3  | 0.001071 |
| RBPJ   | path:04622_4  | 0.001071 |
| RBPJ   | path:04920_7  | 0.001071 |
| RBPJ   | path:05160_5  | 0.001071 |
| RBPJ   | path:05160_6  | 0.001071 |
| GATA6  | path:00591_1  | 0.001082 |
| RBPJ   | path:04622_5  | 0.001085 |
| RBPJ   | path:04920_6  | 0.001085 |
| RBPJ   | path:05220_6  | 0.001085 |
| NFIC   | path:05200_15 | 0.001098 |
| NFIC   | path:05200_39 | 0.001098 |
| NFIC   | path:05200_25 | 0.001098 |
| HIF1A  | path:05200_39 | 0.001098 |
| HIF1A  | path:05200_25 | 0.001098 |
| YBX1   | path:04510_12 | 0.0011   |
| E2F1   | path:04110_6  | 0.001101 |
| SP1    | path:04520_2  | 0.001102 |
| SP1    | path:05200_8  | 0.001102 |
| CEBPA  | path:04060_37 | 0.001105 |
| ELF1   | path:04664_2  | 0.001117 |

|        |               |          |
|--------|---------------|----------|
| RBPJ   | path:05200_33 | 0.001132 |
| RBPJ   | path:05222_7  | 0.001132 |
| MYC    | path:05200_15 | 0.001149 |
| MYC    | path:05219_3  | 0.001149 |
| TP53   | path:04510_13 | 0.00115  |
| TP53   | path:04210_8  | 0.00115  |
| SPI1   | path:04810_16 | 0.00116  |
| JUN    | path:04940_2  | 0.00116  |
| JUN    | path:05320_2  | 0.00116  |
| JUN    | path:05330_2  | 0.00116  |
| JUN    | path:05332_1  | 0.00116  |
| IRF1   | path:04060_1  | 0.001161 |
| RBPJ   | path:04062_11 | 0.001179 |
| RBPJ   | path:04621_3  | 0.001179 |
| TP53   | path:04510_6  | 0.001188 |
| SMAD4  | path:04115_2  | 0.00119  |
| REL    | path:04620_3  | 0.001207 |
| TP53   | path:04510_12 | 0.001207 |
| MYC    | path:05200_2  | 0.001209 |
| MYC    | path:04110_5  | 0.001209 |
| MYC    | path:05212_9  | 0.001209 |
| MYC    | path:05216_3  | 0.001209 |
| SMAD3  | path:05200_18 | 0.001224 |
| SMAD3  | path:05200_15 | 0.001224 |
| RBPJ   | path:04662_1  | 0.001227 |
| RBPJ   | path:05131_5  | 0.001227 |
| SP1    | path:04540_7  | 0.001233 |
| SP1    | path:04060_10 | 0.001233 |
| SP1    | path:05200_41 | 0.001233 |
| SP1    | path:05220_5  | 0.001233 |
| TCF7L2 | path:05222_5  | 0.001235 |
| SP1    | path:04010_7  | 0.001244 |
| ZBTB7A | path:04350_1  | 0.001265 |
| KLF4   | path:04110_13 | 0.001265 |
| POU2F1 | path:04110_5  | 0.001276 |
| REL    | path:04620_1  | 0.001276 |
| POU2F1 | path:05200_25 | 0.001289 |
| REL    | path:04612_5  | 0.001297 |
| HNF1A  | path:04610_6  | 0.001299 |
| HNF1A  | path:04950_3  | 0.001299 |
| GATA2  | path:04060_32 | 0.0013   |
| YBX1   | path:04510_4  | 0.001311 |
| SP3    | path:05200_14 | 0.001311 |
| STAT5B | path:05200_37 | 0.001348 |

|        |               |          |
|--------|---------------|----------|
| STAT5B | path:05219_5  | 0.001348 |
| RBPJ   | path:04210_7  | 0.001352 |
| RBPJ   | path:04722_16 | 0.001352 |
| RBPJ   | path:05142_12 | 0.001352 |
| YY1    | path:05218_3  | 0.001358 |
| YY1    | path:05200_37 | 0.001358 |
| SMAD3  | path:04110_10 | 0.001365 |
| MYC    | path:04110_2  | 0.001367 |
| POU2F1 | path:05200_33 | 0.001379 |
| RELA   | path:04670_4  | 0.001386 |
| HNF4A  | path:00120_1  | 0.00139  |
| ESR1   | path:05200_38 | 0.001399 |
| MYC    | path:05219_5  | 0.001406 |
| JUN    | path:05142_11 | 0.001428 |
| YY1    | path:05218_5  | 0.001438 |
| SP3    | path:05414_2  | 0.001452 |
| TFAP2A | path:04510_6  | 0.001477 |
| TFAP2A | path:04510_5  | 0.001477 |
| TFAP2A | path:04510_7  | 0.001477 |
| RBPJ   | path:04620_8  | 0.001478 |
| RBPJ   | path:04722_10 | 0.001478 |
| RBPJ   | path:05142_6  | 0.001478 |
| CREB1  | path:04620_9  | 0.00149  |
| CREB1  | path:04620_6  | 0.00149  |
| CREB1  | path:04620_8  | 0.00149  |
| CREB1  | path:04620_5  | 0.00149  |
| ATF2   | path:05200_26 | 0.001508 |
| ESR1   | path:05200_15 | 0.001539 |
| ESR1   | path:05200_35 | 0.001539 |
| ESR1   | path:04610_6  | 0.001539 |
| KLF4   | path:05200_14 | 0.001553 |
| KLF4   | path:05200_38 | 0.001553 |
| KLF4   | path:05200_9  | 0.001553 |
| KLF4   | path:05200_13 | 0.001553 |
| KLF4   | path:05219_3  | 0.001553 |
| KLF4   | path:05200_15 | 0.001553 |
| KLF4   | path:05200_35 | 0.001553 |
| KLF4   | path:05200_39 | 0.001553 |
| MYC    | path:04110_7  | 0.001558 |
| E2F1   | path:05200_13 | 0.001569 |
| JUN    | path:04512_3  | 0.00158  |
| HNF4A  | path:04950_2  | 0.0016   |
| ATF2   | path:04612_5  | 0.0016   |
| FOXA3  | path:00591_1  | 0.001605 |

|        |               |          |
|--------|---------------|----------|
| FOXA3  | path:00982_2  | 0.001605 |
| MYC    | path:04110_1  | 0.001623 |
| TP53   | path:04510_4  | 0.001663 |
| REL    | path:04620_4  | 0.001668 |
| SMAD3  | path:04512_2  | 0.001671 |
| SP3    | path:05218_3  | 0.001678 |
| FOS    | path:04610_6  | 0.001679 |
| LEF1   | path:05222_5  | 0.001682 |
| STAT5B | path:05214_3  | 0.001684 |
| STAT5B | path:05220_4  | 0.001684 |
| KLF4   | path:05200_2  | 0.001709 |
| JUN    | path:04512_1  | 0.00171  |
| YY1    | path:04650_3  | 0.001711 |
| SP1    | path:05212_8  | 0.001715 |
| RELA   | path:04670_9  | 0.001739 |
| ETV4   | path:05200_38 | 0.001742 |
| ETV4   | path:05200_35 | 0.001742 |
| ETV4   | path:05200_39 | 0.001742 |
| EGR1   | path:05200_35 | 0.001751 |
| EGR1   | path:05218_4  | 0.001751 |
| TFAP2C | path:05219_2  | 0.001767 |
| STAT1  | path:05200_37 | 0.001776 |
| KLF4   | path:05200_25 | 0.001781 |
| RBPJ   | path:05142_5  | 0.001792 |
| TFAP2A | path:04080_5  | 0.0018   |
| MYC    | path:05214_3  | 0.001802 |
| MYC    | path:05220_4  | 0.001802 |
| E2F1   | path:05200_18 | 0.001813 |
| ETV4   | path:05200_25 | 0.001814 |
| SP3    | path:04060_28 | 0.001816 |
| SP3    | path:05144_2  | 0.001816 |
| RELA   | path:04650_15 | 0.001816 |
| RELA   | path:05142_3  | 0.001816 |
| RELA   | path:04670_8  | 0.001832 |
| IRF5   | path:04060_23 | 0.001849 |
| TP53   | path:04210_9  | 0.001852 |
| TP53   | path:04650_3  | 0.001852 |
| TP53   | path:05215_4  | 0.001852 |
| JUN    | path:04310_7  | 0.001854 |
| KLF4   | path:04115_2  | 0.001857 |
| KLF4   | path:05219_5  | 0.001888 |
| THRB   | path:04080_2  | 0.001909 |
| TP63   | path:05218_3  | 0.001914 |
| TP63   | path:05218_5  | 0.001914 |

|        |               |          |
|--------|---------------|----------|
| STAT1  | path:04620_6  | 0.001938 |
| STAT1  | path:04620_8  | 0.001938 |
| SP3    | path:05200_9  | 0.001963 |
| TP73   | path:04722_15 | 0.001969 |
| FOXA3  | path:00140_1  | 0.00199  |
| RELA   | path:04110_11 | 0.002006 |
| RELA   | path:05200_13 | 0.002006 |
| KLF5   | path:05200_21 | 0.002013 |
| NFIC   | path:05200_37 | 0.002016 |
| STAT1  | path:04620_5  | 0.002032 |
| TP63   | path:05215_4  | 0.00204  |
| SP3    | path:04610_7  | 0.002065 |
| SP3    | path:05220_8  | 0.002065 |
| NFIC   | path:05218_3  | 0.002077 |
| MYC    | path:05213_1  | 0.002078 |
| RELA   | path:04670_6  | 0.002097 |
| SMAD2  | path:04510_13 | 0.002105 |
| E2F1   | path:05014_2  | 0.00212  |
| RBPJ   | path:04620_2  | 0.002128 |
| TP63   | path:05200_1  | 0.002151 |
| TP63   | path:05200_21 | 0.002151 |
| POU2F1 | path:00980_1  | 0.002152 |
| POU2F1 | path:04110_1  | 0.002152 |
| FOXA3  | path:00830_1  | 0.002153 |
| FOXA3  | path:00980_1  | 0.002153 |
| SPI1   | path:04145_1  | 0.002156 |
| SPI1   | path:05150_4  | 0.002156 |
| FOS    | path:04115_2  | 0.00217  |
| SPI1   | path:05200_34 | 0.002179 |
| TP53   | path:05200_1  | 0.002197 |
| TP53   | path:05215_7  | 0.002197 |
| NFIC   | path:00591_1  | 0.002219 |
| NFIC   | path:04080_5  | 0.002219 |
| NFIC   | path:05200_21 | 0.002219 |
| NFIC   | path:05218_1  | 0.002219 |
| NFIC   | path:05218_2  | 0.002219 |
| NFIC   | path:05200_26 | 0.002219 |
| YY1    | path:05200_21 | 0.00222  |
| NFIC   | path:05200_24 | 0.002228 |
| SP1    | path:00590_2  | 0.002236 |
| E2F1   | path:05200_2  | 0.002241 |
| EGR1   | path:05200_25 | 0.002252 |
| VDR    | path:05200_7  | 0.002254 |
| CREM   | path:05200_38 | 0.002267 |

|        |               |          |
|--------|---------------|----------|
| CREM   | path:05200_35 | 0.002267 |
| CREM   | path:05200_39 | 0.002267 |
| CREM   | path:05200_25 | 0.002267 |
| TCF7L2 | path:05222_1  | 0.002291 |
| SP1    | path:04060_19 | 0.002309 |
| SP1    | path:04510_10 | 0.002309 |
| SP1    | path:04722_15 | 0.002309 |
| SP1    | path:05020_2  | 0.002309 |
| SP1    | path:05200_42 | 0.002309 |
| SP1    | path:05142_12 | 0.002321 |
| RBPJ   | path:04722_9  | 0.002348 |
| EGR1   | path:04512_2  | 0.002352 |
| MYC    | path:05210_8  | 0.002364 |
| STAT3  | path:05221_1  | 0.002368 |
| STAT3  | path:05200_16 | 0.002368 |
| STAT3  | path:05200_30 | 0.002368 |
| HNF4A  | path:04610_6  | 0.002385 |
| HNF4A  | path:00140_1  | 0.002385 |
| HNF4A  | path:00590_2  | 0.002385 |
| HNF4A  | path:00010_1  | 0.002385 |
| HNF4A  | path:04950_3  | 0.002385 |
| HNF4A  | path:00590_1  | 0.002385 |
| AR     | path:05200_12 | 0.002388 |
| AR     | path:04110_13 | 0.002388 |
| AR     | path:05215_9  | 0.002424 |
| RBPJ   | path:05200_20 | 0.002436 |
| GATA3  | path:04612_4  | 0.002447 |
| STAT3  | path:05200_26 | 0.002456 |
| ELF1   | path:04650_10 | 0.002457 |
| ELF1   | path:04650_9  | 0.002457 |
| ELF1   | path:04650_2  | 0.002457 |
| ELF1   | path:04650_8  | 0.002457 |
| RELA   | path:04650_14 | 0.002465 |
| RELA   | path:05200_15 | 0.002465 |
| HNF1A  | path:04610_4  | 0.002466 |
| HNF1A  | path:04610_3  | 0.002466 |
| SP1    | path:04510_19 | 0.002496 |
| SP1    | path:05200_29 | 0.002496 |
| EGR1   | path:04510_5  | 0.002517 |
| RBPJ   | path:04920_1  | 0.002524 |
| AR     | path:05200_14 | 0.00253  |
| AR     | path:05200_38 | 0.00253  |
| AR     | path:05219_3  | 0.00253  |
| AR     | path:05200_9  | 0.00253  |



|        |               |          |
|--------|---------------|----------|
| AR     | path:05200_13 | 0.00253  |
| YY1    | path:05200_26 | 0.002558 |
| JUN    | path:04670_2  | 0.002581 |
| ELF1   | path:04650_4  | 0.002588 |
| ESR1   | path:00830_1  | 0.0026   |
| KLF4   | path:05214_3  | 0.002607 |
| KLF4   | path:05220_4  | 0.002607 |
| STAT1  | path:05200_21 | 0.002612 |
| MYC    | path:05210_5  | 0.002658 |
| KLF4   | path:05200_37 | 0.002689 |
| IRF5   | path:04650_5  | 0.002693 |
| IRF5   | path:04650_3  | 0.002693 |
| IRF5   | path:04620_7  | 0.002693 |
| IRF5   | path:04620_2  | 0.002693 |
| IRF5   | path:05160_4  | 0.002693 |
| GATA6  | path:00590_2  | 0.002699 |
| GATA6  | path:00590_1  | 0.002699 |
| SP3    | path:04610_2  | 0.002702 |
| JUN    | path:05120_7  | 0.002705 |
| TP63   | path:05200_20 | 0.002718 |
| SMAD4  | path:04012_7  | 0.002721 |
| AR     | path:05200_15 | 0.002722 |
| AR     | path:05216_3  | 0.002722 |
| AR     | path:05200_39 | 0.002722 |
| AR     | path:04110_9  | 0.002722 |
| AR     | path:05200_2  | 0.002722 |
| AR     | path:04110_5  | 0.002722 |
| AR     | path:05219_5  | 0.002722 |
| POU2F1 | path:00591_1  | 0.002768 |
| POU2F1 | path:04664_1  | 0.002768 |
| TP53   | path:04912_7  | 0.002771 |
| GLI3   | path:05217_1  | 0.002794 |
| GLI3   | path:05217_2  | 0.002794 |
| GLI3   | path:05200_27 | 0.002794 |
| GLI3   | path:05200_28 | 0.002794 |
| NR5A2  | path:03320_1  | 0.002861 |
| ZBTB7A | path:04110_5  | 0.00295  |
| IRF2   | path:04620_3  | 0.002952 |
| IRF2   | path:04620_1  | 0.002952 |
| RELA   | path:04110_10 | 0.002957 |
| TCF7L2 | path:05215_5  | 0.002985 |
| RELA   | path:04110_9  | 0.002985 |
| RELA   | path:05200_2  | 0.002985 |
| JUN    | path:04610_6  | 0.003004 |

|        |               |          |
|--------|---------------|----------|
| JUN    | path:05120_3  | 0.003004 |
| SMAD4  | path:05210_8  | 0.003025 |
| TP73   | path:05200_33 | 0.003027 |
| SP3    | path:04110_4  | 0.003036 |
| ATF2   | path:05020_4  | 0.003047 |
| ATF2   | path:05219_3  | 0.003047 |
| NFYA   | path:04110_4  | 0.003087 |
| TP63   | path:05215_6  | 0.003093 |
| TP63   | path:05200_3  | 0.003093 |
| TP63   | path:05215_9  | 0.003093 |
| RELA   | path:04110_5  | 0.003103 |
| SMAD3  | path:04012_7  | 0.003126 |
| LEF1   | path:05222_1  | 0.003143 |
| TFAP2A | path:05215_7  | 0.003177 |
| NR112  | path:00982_2  | 0.00321  |
| SP1    | path:04630_1  | 0.003223 |
| SP1    | path:04620_6  | 0.003223 |
| SP1    | path:04620_8  | 0.003223 |
| SP1    | path:05220_8  | 0.003223 |
| PAX6   | path:04670_4  | 0.003244 |
| RELA   | path:04650_13 | 0.003264 |
| IRF1   | path:04620_13 | 0.003327 |
| JUNB   | path:04350_2  | 0.003328 |
| JUNB   | path:04350_3  | 0.003328 |
| SMAD4  | path:05210_5  | 0.003331 |
| PAX6   | path:04670_2  | 0.003345 |
| PAX6   | path:04670_9  | 0.003345 |
| ESR1   | path:00980_1  | 0.003353 |
| TP63   | path:05200_14 | 0.003368 |
| KLF4   | path:05210_8  | 0.003371 |
| TP53   | path:05223_2  | 0.003372 |
| MYC    | path:05223_3  | 0.00338  |
| SP3    | path:05218_1  | 0.003395 |
| TP63   | path:05215_10 | 0.003441 |
| TP63   | path:04110_11 | 0.003441 |
| TP63   | path:05200_9  | 0.003441 |
| TP63   | path:05200_13 | 0.003441 |
| FOS    | path:04620_9  | 0.003457 |
| FOS    | path:04610_7  | 0.003457 |
| FOS    | path:04620_6  | 0.003457 |
| FOS    | path:04620_8  | 0.003457 |
| SMAD3  | path:05210_8  | 0.003524 |
| FLI1   | path:04512_3  | 0.003526 |
| CREM   | path:05200_37 | 0.003557 |

|        |               |          |
|--------|---------------|----------|
| FOS    | path:04620_5  | 0.003567 |
| BCL6   | path:04210_3  | 0.00357  |
| NR1I2  | path:00830_1  | 0.003589 |
| NR1I2  | path:00980_1  | 0.003589 |
| TP53   | path:05200_20 | 0.003604 |
| SP1    | path:04060_20 | 0.003616 |
| KLF4   | path:05145_11 | 0.003616 |
| KLF4   | path:05210_5  | 0.003616 |
| POU2F1 | path:05200_21 | 0.003618 |
| TFAP2A | path:05200_16 | 0.003624 |
| TFAP2A | path:05223_1  | 0.003624 |
| SP1    | path:04210_6  | 0.003664 |
| SP1    | path:00350_2  | 0.003664 |
| SP1    | path:04620_5  | 0.003664 |
| SP1    | path:04650_3  | 0.003664 |
| SP1    | path:05215_4  | 0.003664 |
| RBPJ   | path:05200_14 | 0.003673 |
| SP3    | path:05200_16 | 0.003683 |
| SP3    | path:05218_2  | 0.003683 |
| SP3    | path:00120_2  | 0.003683 |
| TP63   | path:05200_19 | 0.003688 |
| TP63   | path:05200_15 | 0.003688 |
| TP63   | path:05200_39 | 0.003688 |
| MYC    | path:05221_2  | 0.003701 |
| TFAP2A | path:04520_2  | 0.003715 |
| TFAP2A | path:05200_26 | 0.003715 |
| TFAP2A | path:04912_7  | 0.003715 |
| ATF2   | path:04010_11 | 0.00372  |
| ATF2   | path:05212_9  | 0.00372  |
| SP1    | path:05200_17 | 0.003728 |
| TFAP2A | path:04010_7  | 0.003765 |
| TFAP2A | path:05212_3  | 0.003765 |
| AR     | path:05214_3  | 0.003775 |
| AR     | path:05220_4  | 0.003775 |
| CEBPB  | path:05200_35 | 0.003841 |
| CEBPB  | path:05200_39 | 0.003841 |
| YBX1   | path:05213_2  | 0.003844 |
| YBX1   | path:05100_10 | 0.003844 |
| YBX1   | path:05100_11 | 0.003844 |
| YBX1   | path:05211_4  | 0.003844 |
| BCL6   | path:04210_6  | 0.003892 |
| SMAD3  | path:05210_5  | 0.003931 |
| RBPJ   | path:05215_10 | 0.003933 |
| TP63   | path:05200_2  | 0.003951 |

|        |               |          |
|--------|---------------|----------|
| SRF    | path:05416_1  | 0.003973 |
| GLI3   | path:04340_1  | 0.003996 |
| RBPJ   | path:04620_4  | 0.004027 |
| ATF2   | path:04110_11 | 0.004031 |
| ZBTB7B | path:04512_2  | 0.004036 |
| ZBTB7B | path:04512_3  | 0.004036 |
| ZBTB7B | path:04512_1  | 0.004036 |
| ZBTB7B | path:04510_14 | 0.004036 |
| ZBTB7B | path:04510_1  | 0.004036 |
| ZBTB7B | path:04510_13 | 0.004036 |
| ZBTB7B | path:04510_6  | 0.004036 |
| ZBTB7B | path:04510_5  | 0.004036 |
| ZBTB7B | path:04510_7  | 0.004036 |
| ESR1   | path:04610_7  | 0.004068 |
| TP63   | path:05200_25 | 0.004079 |
| AR     | path:04110_1  | 0.004098 |
| GATA1  | path:04060_32 | 0.004098 |
| ZBTB7A | path:04110_1  | 0.004114 |
| LEF1   | path:05215_5  | 0.004122 |
| AR     | path:05215_1  | 0.00415  |
| EGR1   | path:05200_37 | 0.004181 |
| EGR1   | path:04512_3  | 0.004181 |
| EGR1   | path:05200_31 | 0.004181 |
| RORA   | path:05200_36 | 0.004284 |
| ATF2   | path:05219_5  | 0.004286 |
| ATF2   | path:00140_1  | 0.004286 |
| ATF2   | path:05200_18 | 0.004286 |
| CEBPB  | path:05200_33 | 0.004299 |
| EGR1   | path:04512_1  | 0.004316 |
| E2F1   | path:05222_5  | 0.004322 |
| IRF1   | path:04620_10 | 0.004324 |
| SP1    | path:04060_32 | 0.004327 |
| SP1    | path:04940_2  | 0.004327 |
| SP1    | path:05320_2  | 0.004327 |
| SP1    | path:05330_2  | 0.004327 |
| SP1    | path:05332_1  | 0.004327 |
| TFAP2A | path:05212_8  | 0.004356 |
| SP1    | path:05020_1  | 0.004376 |
| SP1    | path:05221_2  | 0.004376 |
| ATF2   | path:05200_15 | 0.004376 |
| IRF1   | path:04620_6  | 0.004384 |
| IRF1   | path:04620_8  | 0.004384 |
| YBX1   | path:05211_5  | 0.004386 |
| YBX1   | path:04510_13 | 0.004386 |

|        |               |          |
|--------|---------------|----------|
| YBX1   | path:04510_6  | 0.004386 |
| YBX1   | path:04510_5  | 0.004386 |
| YBX1   | path:04510_7  | 0.004386 |
| FOXO3  | path:04920_2  | 0.004407 |
| TFAP2C | path:04912_7  | 0.004411 |
| IRF1   | path:04620_5  | 0.004456 |
| ELF1   | path:04060_34 | 0.004481 |
| TP63   | path:04110_2  | 0.004483 |
| STAT3  | path:04630_1  | 0.004494 |
| TP53   | path:04510_19 | 0.0045   |
| SP3    | path:00120_1  | 0.004574 |
| EGR1   | path:05215_7  | 0.004587 |
| KLF5   | path:05200_35 | 0.004593 |
| KLF5   | path:05200_25 | 0.004593 |
| POU2F1 | path:05200_24 | 0.004597 |
| AR     | path:05200_7  | 0.004618 |
| SRF    | path:05020_3  | 0.004628 |
| SRF    | path:05020_4  | 0.004628 |
| RELA   | path:04612_5  | 0.004631 |
| NFIC   | path:05219_3  | 0.004636 |
| STAT6  | path:00590_2  | 0.004645 |
| STAT6  | path:00590_1  | 0.004645 |
| ESR1   | path:04610_2  | 0.004673 |
| SP1    | path:04520_5  | 0.004701 |
| SP1    | path:04110_4  | 0.004701 |
| SP1    | path:05200_1  | 0.004701 |
| TP53   | path:04360_3  | 0.004707 |
| TP53   | path:05160_10 | 0.004707 |
| CEBPB  | path:05200_25 | 0.004738 |
| SPI1   | path:04620_3  | 0.004758 |
| SP1    | path:04060_46 | 0.004878 |
| SP1    | path:05100_6  | 0.004878 |
| SP1    | path:05145_6  | 0.004878 |
| SP1    | path:05212_10 | 0.004878 |
| NFIC   | path:04510_6  | 0.004886 |
| E2F1   | path:04510_10 | 0.004902 |
| JUN    | path:04310_5  | 0.004909 |
| STAT1  | path:04110_13 | 0.004937 |
| STAT1  | path:04620_1  | 0.004937 |
| STAT1  | path:05219_3  | 0.004937 |
| STAT1  | path:04630_1  | 0.004937 |
| YBX1   | path:05211_1  | 0.004962 |
| YBX1   | path:05212_4  | 0.004962 |
| CEBPB  | path:04010_18 | 0.005023 |

|        |               |          |
|--------|---------------|----------|
| TP63   | path:04110_7  | 0.00504  |
| RBPJ   | path:05200_35 | 0.005103 |
| RBPJ   | path:05200_39 | 0.005103 |
| SP1    | path:04210_5  | 0.005211 |
| ATF2   | path:04110_9  | 0.005236 |
| POU2F1 | path:05200_20 | 0.005253 |
| TFAP2A | path:04510_19 | 0.005264 |
| TFAP2A | path:05200_29 | 0.005264 |
| SP3    | path:04110_2  | 0.005272 |
| STAT1  | path:04670_4  | 0.005275 |
| STAT1  | path:04145_4  | 0.005275 |
| STAT1  | path:05145_8  | 0.005275 |
| STAT1  | path:05216_3  | 0.005275 |
| STAT1  | path:04670_2  | 0.005275 |
| EGR1   | path:05200_16 | 0.005288 |
| ATF2   | path:04110_5  | 0.005296 |
| ATF2   | path:05214_3  | 0.005296 |
| ATF2   | path:05220_4  | 0.005296 |
| FOXA2  | path:00980_1  | 0.005302 |
| ESR1   | path:05200_21 | 0.005318 |
| TP53   | path:05200_3  | 0.00533  |
| POU2F1 | path:00232_1  | 0.005358 |
| POU2F1 | path:04060_4  | 0.005358 |
| POU2F1 | path:05219_3  | 0.005358 |
| POU2F1 | path:04350_1  | 0.005358 |
| STAT1  | path:04670_9  | 0.005426 |
| NFATC1 | path:04060_19 | 0.005447 |
| NFATC1 | path:04060_20 | 0.005447 |
| ESR1   | path:05200_30 | 0.005467 |
| SP3    | path:05200_20 | 0.00551  |
| RBPJ   | path:05200_2  | 0.005577 |
| POU2F1 | path:00982_2  | 0.005606 |
| RELA   | path:04650_3  | 0.005642 |
| SP1    | path:04010_8  | 0.005644 |
| SP1    | path:05214_2  | 0.005644 |
| SP1    | path:04620_1  | 0.005646 |
| NFIC   | path:05200_13 | 0.005688 |
| NFIC   | path:05200_6  | 0.005688 |
| NFIC   | path:00140_1  | 0.005688 |
| NFIC   | path:05200_18 | 0.005688 |
| TP63   | path:05200_37 | 0.005735 |
| TP63   | path:05200_7  | 0.005735 |
| STAT1  | path:04620_4  | 0.005738 |
| STAT1  | path:04670_8  | 0.005738 |

|        |               |          |
|--------|---------------|----------|
| HNF4A  | path:00561_2  | 0.005773 |
| STAT1  | path:05219_5  | 0.005807 |
| PAX6   | path:04512_2  | 0.005809 |
| CEBPA  | path:04610_5  | 0.005819 |
| TP53   | path:05014_2  | 0.005838 |
| RBPJ   | path:05200_25 | 0.005865 |
| STAT5B | path:05200_33 | 0.005876 |
| CREM   | path:05210_8  | 0.005885 |
| CREM   | path:05210_5  | 0.005885 |
| SP3    | path:04810_16 | 0.005886 |
| SMAD4  | path:05211_5  | 0.005916 |
| TP53   | path:04012_5  | 0.005921 |
| NFATC2 | path:04060_19 | 0.005962 |
| FOS    | path:05200_24 | 0.005988 |
| KLF5   | path:05200_37 | 0.005998 |
| EGR1   | path:05212_3  | 0.006036 |
| SP1    | path:05223_1  | 0.006038 |
| ETS1   | path:04610_4  | 0.006052 |
| ETS1   | path:04620_9  | 0.006052 |
| ETS1   | path:04610_1  | 0.006052 |
| ETS1   | path:04610_3  | 0.006052 |
| ETS1   | path:04620_6  | 0.006052 |
| ETS1   | path:04620_5  | 0.006052 |
| ETS1   | path:05215_4  | 0.006052 |
| ETS1   | path:04610_2  | 0.006052 |
| ETS1   | path:04612_4  | 0.006052 |
| ETS1   | path:05212_6  | 0.006052 |
| STAT1  | path:04110_11 | 0.006064 |
| ETS1   | path:05212_1  | 0.006081 |
| CEBPB  | path:04610_4  | 0.006129 |
| YY1    | path:05212_9  | 0.006167 |
| ATF2   | path:04110_2  | 0.006193 |
| TP53   | path:04012_1  | 0.006227 |
| STAT1  | path:04670_6  | 0.006232 |
| NFATC2 | path:04060_20 | 0.006256 |
| PAX6   | path:04510_12 | 0.006286 |
| SP1    | path:04510_17 | 0.006301 |
| ELK1   | path:05200_26 | 0.006362 |
| ELK1   | path:04010_11 | 0.006362 |
| ELK1   | path:05020_3  | 0.006362 |
| ELK1   | path:05020_4  | 0.006362 |
| ELK1   | path:05110_3  | 0.006362 |
| NFIC   | path:04660_9  | 0.006384 |
| NFIC   | path:04662_9  | 0.006384 |

|        |               |          |
|--------|---------------|----------|
| NFIC   | path:05200_2  | 0.006384 |
| NR1I3  | path:00982_2  | 0.006406 |
| ELK1   | path:05200_18 | 0.006535 |
| NFIC   | path:05214_3  | 0.006542 |
| NFIC   | path:05220_4  | 0.006542 |
| NFIC   | path:04115_2  | 0.006542 |
| NFIC   | path:04512_2  | 0.006542 |
| RELA   | path:04060_35 | 0.006581 |
| SPI1   | path:04650_1  | 0.006607 |
| POU2F1 | path:05216_3  | 0.006638 |
| NFATC2 | path:04060_46 | 0.006669 |
| ATF2   | path:05142_11 | 0.006684 |
| ATF2   | path:05210_8  | 0.006684 |
| ATF2   | path:05222_5  | 0.006684 |
| ETS1   | path:05212_2  | 0.006742 |
| IRF1   | path:04620_2  | 0.006742 |
| NR2F2  | path:00140_1  | 0.00675  |
| NR2F2  | path:03320_1  | 0.00675  |
| MYC    | path:04510_13 | 0.006799 |
| NR5A1  | path:04350_6  | 0.006802 |
| ETS1   | path:05212_3  | 0.006813 |
| IRF1   | path:05160_4  | 0.006813 |
| TP53   | path:05160_9  | 0.006828 |
| TP53   | path:05213_3  | 0.006828 |
| EGR1   | path:05212_8  | 0.006832 |
| IRF1   | path:04060_35 | 0.006848 |
| IRF3   | path:04620_6  | 0.006879 |
| IRF3   | path:04620_8  | 0.006879 |
| IRF3   | path:04620_5  | 0.006879 |
| IRF7   | path:04620_6  | 0.006879 |
| IRF7   | path:04620_8  | 0.006879 |
| IRF7   | path:04620_5  | 0.006879 |
| SMAD4  | path:04350_4  | 0.006895 |
| ATF2   | path:04110_7  | 0.006925 |
| CREB1  | path:04514_19 | 0.006954 |
| CREB1  | path:04612_3  | 0.006954 |
| IRF2   | path:05145_8  | 0.00698  |
| ATF2   | path:04010_10 | 0.007029 |
| ATF2   | path:04110_1  | 0.007029 |
| ATF2   | path:05210_5  | 0.007029 |
| ELF1   | path:00920_1  | 0.007049 |
| EGR1   | path:04144_2  | 0.007083 |
| SMAD4  | path:04510_6  | 0.007089 |
| SMAD4  | path:04510_5  | 0.007089 |



|        |               |          |
|--------|---------------|----------|
| SMAD4  | path:04510_7  | 0.007089 |
| YBX1   | path:04910_8  | 0.007091 |
| SP3    | path:04110_7  | 0.007122 |
| JUN    | path:04512_2  | 0.007183 |
| JUN    | path:04612_5  | 0.007183 |
| JUN    | path:05200_41 | 0.007183 |
| TP53   | path:04010_11 | 0.007192 |
| SMAD2  | path:05200_21 | 0.007234 |
| SMAD2  | path:05200_30 | 0.007234 |
| SMAD2  | path:05200_26 | 0.007234 |
| SMAD2  | path:05200_24 | 0.007234 |
| RELA   | path:05200_21 | 0.007297 |
| ESR1   | path:05212_8  | 0.007324 |
| EGR1   | path:04350_1  | 0.007341 |
| TFAP2A | path:04012_5  | 0.007365 |
| YY1    | path:05219_5  | 0.007374 |
| YY1    | path:05200_38 | 0.007374 |
| HNF1A  | path:00982_2  | 0.007452 |
| YY1    | path:05200_13 | 0.007519 |
| ETS1   | path:05212_8  | 0.007522 |
| YBX1   | path:05212_6  | 0.007526 |
| YBX1   | path:05215_7  | 0.007526 |
| BCL6   | path:05220_8  | 0.007528 |
| BCL6   | path:05200_21 | 0.007528 |
| TP53   | path:05200_38 | 0.007528 |
| TCF7L2 | path:05200_24 | 0.007564 |
| FOSL1  | path:05200_38 | 0.007569 |
| FOSL1  | path:05200_39 | 0.007569 |
| FOSL1  | path:05200_25 | 0.007569 |
| EGR1   | path:05200_29 | 0.007606 |
| BCL6   | path:04110_13 | 0.007614 |
| BCL6   | path:04630_1  | 0.007614 |
| BCL6   | path:04110_11 | 0.007614 |
| BCL6   | path:05200_13 | 0.007614 |
| BCL6   | path:05200_15 | 0.007614 |
| BCL6   | path:05200_39 | 0.007614 |
| BCL6   | path:04110_10 | 0.007614 |
| BCL6   | path:04110_9  | 0.007614 |
| BCL6   | path:05200_2  | 0.007614 |
| BCL6   | path:04110_5  | 0.007614 |
| BCL6   | path:05200_25 | 0.007614 |
| MYC    | path:05218_3  | 0.00762  |
| BCL6   | path:04115_2  | 0.007624 |
| ETS1   | path:04620_3  | 0.007626 |

|        |               |          |
|--------|---------------|----------|
| MYOD1  | path:05200_24 | 0.007641 |
| MYOD1  | path:05200_38 | 0.007641 |
| MYOD1  | path:05200_18 | 0.007641 |
| MYOD1  | path:05200_15 | 0.007641 |
| MYOD1  | path:05200_39 | 0.007641 |
| MYOD1  | path:05200_25 | 0.007641 |
| BCL6   | path:04110_2  | 0.007648 |
| SP1    | path:04210_4  | 0.007677 |
| TFAP2A | path:04520_5  | 0.007687 |
| YBX1   | path:05212_1  | 0.007688 |
| YBX1   | path:05200_16 | 0.007688 |
| YBX1   | path:05223_1  | 0.007688 |
| STAT5B | path:05218_3  | 0.007738 |
| NFATC1 | path:04060_34 | 0.007771 |
| STAT5B | path:05218_5  | 0.007781 |
| STAT1  | path:05214_3  | 0.007806 |
| STAT1  | path:05220_4  | 0.007806 |
| SP1    | path:00330_1  | 0.007811 |
| SP1    | path:05212_3  | 0.007811 |
| YBX1   | path:05212_2  | 0.007857 |
| YBX1   | path:05200_24 | 0.007857 |
| YBX1   | path:05212_3  | 0.007857 |
| YBX1   | path:04910_13 | 0.007857 |
| YBX1   | path:05223_2  | 0.007857 |
| AR     | path:05221_2  | 0.007863 |
| SP3    | path:00600_1  | 0.007906 |
| STAT1  | path:04110_10 | 0.007932 |
| KLF4   | path:05200_33 | 0.00799  |
| E2F1   | path:04210_5  | 0.007997 |
| MYC    | path:05218_5  | 0.008    |
| JUND   | path:05200_24 | 0.00807  |
| YBX1   | path:05212_8  | 0.008078 |
| STAT1  | path:04110_9  | 0.008119 |
| SMAD4  | path:04350_3  | 0.008193 |
| CEBPB  | path:04210_9  | 0.008204 |
| NFIC   | path:04660_10 | 0.008238 |
| NFIC   | path:04662_5  | 0.008238 |
| POU2F1 | path:05219_5  | 0.008262 |
| CREB1  | path:04620_4  | 0.008263 |
| GLI1   | path:04510_10 | 0.008264 |
| ESR1   | path:05219_3  | 0.008286 |
| ESR1   | path:00982_2  | 0.008286 |
| YBX1   | path:04144_2  | 0.008299 |
| NFIC   | path:04010_22 | 0.008376 |

|        |               |          |
|--------|---------------|----------|
| SP1    | path:05214_1  | 0.008395 |
| BCL6   | path:04110_7  | 0.0084   |
| BCL6   | path:04110_1  | 0.008428 |
| TFAP2A | path:04020_1  | 0.008474 |
| STAT1  | path:05213_1  | 0.008595 |
| YY1    | path:05200_18 | 0.008601 |
| FOS    | path:05219_3  | 0.00861  |
| SMAD3  | path:04350_4  | 0.008655 |
| YBX1   | path:04910_2  | 0.008741 |
| YBX1   | path:05200_29 | 0.008741 |
| RELA   | path:05219_3  | 0.00875  |
| SPI1   | path:04650_7  | 0.008788 |
| SPI1   | path:05146_1  | 0.008788 |
| ATF2   | path:04010_6  | 0.008818 |
| ATF2   | path:05223_3  | 0.008818 |
| JUN    | path:04610_7  | 0.008856 |
| NFATC2 | path:04060_34 | 0.00892  |
| BCL6   | path:05200_37 | 0.008936 |
| NFIC   | path:04722_15 | 0.008938 |
| IRF2   | path:04060_34 | 0.008963 |
| SP1    | path:05014_1  | 0.009002 |
| SP1    | path:05215_5  | 0.009002 |
| RBPJ   | path:05200_37 | 0.009007 |
| MYC    | path:05200_34 | 0.009021 |
| ETS2   | path:04310_7  | 0.009024 |
| ETS2   | path:05200_9  | 0.009024 |
| ETS2   | path:05200_19 | 0.009024 |
| ETS2   | path:04310_5  | 0.009024 |
| ETS2   | path:05200_2  | 0.009024 |
| ETS2   | path:05200_17 | 0.009024 |
| SP3    | path:05222_1  | 0.009031 |
| TCF7L2 | path:04350_1  | 0.009037 |
| ETS1   | path:04620_1  | 0.009042 |
| SRF    | path:05410_1  | 0.009074 |
| STAT3  | path:04012_4  | 0.009094 |
| STAT3  | path:04060_34 | 0.009094 |
| EGR1   | path:05215_9  | 0.009118 |
| SP1    | path:04660_9  | 0.009179 |
| SP1    | path:04662_9  | 0.009179 |
| SP1    | path:05200_32 | 0.009179 |
| FOS    | path:04310_7  | 0.00922  |
| YY1    | path:05200_35 | 0.009247 |
| SREBF1 | path:04910_1  | 0.009269 |
| TP53   | path:05200_18 | 0.009346 |

|        |               |          |
|--------|---------------|----------|
| STAT3  | path:05218_4  | 0.009361 |
| ELK1   | path:04010_4  | 0.009417 |
| TFAP2A | path:04520_3  | 0.009447 |
| POU2F1 | path:04620_4  | 0.009505 |
| GLI1   | path:04510_8  | 0.009525 |
| TCF7L2 | path:04110_13 | 0.009585 |
| STAT1  | path:05145_12 | 0.009623 |
| STAT1  | path:05222_5  | 0.009623 |
| YBX1   | path:05200_10 | 0.009637 |
| YBX1   | path:05215_9  | 0.009637 |
| TCF7L2 | path:04630_1  | 0.009653 |
| STAT5B | path:05200_21 | 0.009725 |
| STAT5B | path:05218_1  | 0.009725 |
| ATF2   | path:04650_15 | 0.009755 |
| STAT5B | path:05218_2  | 0.00976  |
| TFAP2A | path:04520_7  | 0.009806 |
| STAT5B | path:05200_26 | 0.009809 |
| ETS1   | path:05215_9  | 0.009853 |
| STAT5B | path:05200_24 | 0.00987  |
| ETS1   | path:04060_46 | 0.009911 |
| NFIC   | path:05200_7  | 0.00997  |

---

**Table S7. The detailed information of the co-motif TFs regulated sub-pathways of TSN with k=4.**

| <b>TF</b> | <b>Subpathway</b> |
|-----------|-------------------|
| HNF4A     | path:00010_1      |
| HNF4A     | path:00120_1      |
| SP3       | path:00120_1      |
| SP3       | path:00120_2      |
| ATF2      | path:00140_1      |
| FOXA3     | path:00140_1      |
| HNF1A     | path:00140_1      |
| HNF4A     | path:00140_1      |
| NFIC      | path:00140_1      |
| NR2F2     | path:00140_1      |
| NR4A1     | path:00140_1      |
| NR5A1     | path:00140_1      |
| NR5A2     | path:00140_1      |
| SP1       | path:00140_1      |
| SP3       | path:00140_1      |
| POU2F1    | path:00232_1      |
| SP1       | path:00330_1      |
| SP1       | path:00330_3      |
| SP1       | path:00330_4      |
| SP1       | path:00330_5      |
| MITF      | path:00350_1      |
| SP1       | path:00350_2      |
| NFE2L2    | path:00480_1      |
| HNF4A     | path:00561_2      |
| GATA4     | path:00590_1      |
| GATA6     | path:00590_1      |
| HNF4A     | path:00590_1      |
| POU2F1    | path:00590_1      |
| STAT6     | path:00590_1      |
| GATA4     | path:00590_2      |
| GATA6     | path:00590_2      |
| HNF4A     | path:00590_2      |
| POU2F1    | path:00590_2      |
| SP1       | path:00590_2      |
| STAT6     | path:00590_2      |
| FOXA3     | path:00591_1      |
| GATA4     | path:00591_1      |
| GATA6     | path:00591_1      |
| HNF4A     | path:00591_1      |
| NFIC      | path:00591_1      |
| POU2F1    | path:00591_1      |
| SP3       | path:00600_1      |

|        |               |
|--------|---------------|
| ESR1   | path:00830_1  |
| FOXA3  | path:00830_1  |
| HNF4A  | path:00830_1  |
| NR1I2  | path:00830_1  |
| NR1I3  | path:00830_1  |
| POU2F1 | path:00830_1  |
| ELF1   | path:00920_1  |
| ESR1   | path:00980_1  |
| FOXA2  | path:00980_1  |
| FOXA3  | path:00980_1  |
| GATA4  | path:00980_1  |
| HNF1A  | path:00980_1  |
| HNF4A  | path:00980_1  |
| NR1I2  | path:00980_1  |
| NR1I3  | path:00980_1  |
| POU2F1 | path:00980_1  |
| SP1    | path:00980_1  |
| ESR1   | path:00982_2  |
| FOXA3  | path:00982_2  |
| GATA4  | path:00982_2  |
| HNF1A  | path:00982_2  |
| HNF4A  | path:00982_2  |
| NR1I2  | path:00982_2  |
| NR1I3  | path:00982_2  |
| POU2F1 | path:00982_2  |
| HNF4A  | path:03320_1  |
| NR2F1  | path:03320_1  |
| NR2F2  | path:03320_1  |
| NR5A2  | path:03320_1  |
| ATF2   | path:04010_10 |
| ATF2   | path:04010_11 |
| ELK1   | path:04010_11 |
| TP53   | path:04010_11 |
| CEBPB  | path:04010_18 |
| NFIC   | path:04010_22 |
| ELK1   | path:04010_4  |
| ATF2   | path:04010_6  |
| SP1    | path:04010_6  |
| SP1    | path:04010_7  |
| TFAP2A | path:04010_7  |
| SP1    | path:04010_8  |
| TP53   | path:04012_1  |
| STAT3  | path:04012_4  |
| TFAP2A | path:04012_5  |

|        |               |
|--------|---------------|
| TP53   | path:04012_5  |
| SMAD3  | path:04012_7  |
| SMAD4  | path:04012_7  |
| TFAP2A | path:04020_1  |
| ELF1   | path:04060_1  |
| IRF1   | path:04060_1  |
| STAT3  | path:04060_1  |
| SP1    | path:04060_10 |
| NFATC1 | path:04060_19 |
| NFATC2 | path:04060_19 |
| SP1    | path:04060_19 |
| NR5A1  | path:04060_2  |
| NFATC1 | path:04060_20 |
| NFATC2 | path:04060_20 |
| SP1    | path:04060_20 |
| SP3    | path:04060_20 |
| IRF3   | path:04060_23 |
| IRF5   | path:04060_23 |
| IRF7   | path:04060_23 |
| SPI1   | path:04060_26 |
| SP3    | path:04060_28 |
| GATA1  | path:04060_32 |
| GATA2  | path:04060_32 |
| SP1    | path:04060_32 |
| ELF1   | path:04060_34 |
| IRF2   | path:04060_34 |
| NFATC1 | path:04060_34 |
| NFATC2 | path:04060_34 |
| STAT3  | path:04060_34 |
| IRF1   | path:04060_35 |
| RELA   | path:04060_35 |
| CEBPA  | path:04060_37 |
| CEBPB  | path:04060_38 |
| NFATC2 | path:04060_4  |
| POU2F1 | path:04060_4  |
| RELA   | path:04060_44 |
| ETS1   | path:04060_46 |
| NFATC2 | path:04060_46 |
| SP1    | path:04060_46 |
| CEBPB  | path:04062_1  |
| RELA   | path:04062_1  |
| RBPJ   | path:04062_11 |
| CEBPB  | path:04062_2  |
| RELA   | path:04062_2  |

|        |               |
|--------|---------------|
| THRB   | path:04080_2  |
| NFIC   | path:04080_5  |
| TFAP2A | path:04080_5  |
| AR     | path:04110_1  |
| ATF2   | path:04110_1  |
| BCL6   | path:04110_1  |
| E2F1   | path:04110_1  |
| KLF4   | path:04110_1  |
| MYC    | path:04110_1  |
| NFYA   | path:04110_1  |
| POU2F1 | path:04110_1  |
| RELA   | path:04110_1  |
| SP1    | path:04110_1  |
| SP3    | path:04110_1  |
| TP53   | path:04110_1  |
| TP63   | path:04110_1  |
| YY1    | path:04110_1  |
| ZBTB7A | path:04110_1  |
| AR     | path:04110_10 |
| ATF2   | path:04110_10 |
| BCL6   | path:04110_10 |
| E2F1   | path:04110_10 |
| KLF4   | path:04110_10 |
| MYC    | path:04110_10 |
| NFYA   | path:04110_10 |
| POU2F1 | path:04110_10 |
| RELA   | path:04110_10 |
| SMAD2  | path:04110_10 |
| SMAD3  | path:04110_10 |
| SMAD4  | path:04110_10 |
| SP1    | path:04110_10 |
| SP3    | path:04110_10 |
| STAT1  | path:04110_10 |
| TP53   | path:04110_10 |
| TP63   | path:04110_10 |
| YY1    | path:04110_10 |
| ZBTB7A | path:04110_10 |
| ATF2   | path:04110_11 |
| BCL6   | path:04110_11 |
| E2F1   | path:04110_11 |
| KLF4   | path:04110_11 |
| MYC    | path:04110_11 |
| NFYA   | path:04110_11 |
| POU2F1 | path:04110_11 |



|        |               |
|--------|---------------|
| RELA   | path:04110_11 |
| SP1    | path:04110_11 |
| SP3    | path:04110_11 |
| STAT1  | path:04110_11 |
| TP53   | path:04110_11 |
| TP63   | path:04110_11 |
| YY1    | path:04110_11 |
| ZBTB7A | path:04110_11 |
| AR     | path:04110_13 |
| ATF2   | path:04110_13 |
| BCL6   | path:04110_13 |
| E2F1   | path:04110_13 |
| KLF4   | path:04110_13 |
| MYC    | path:04110_13 |
| POU2F1 | path:04110_13 |
| SMAD2  | path:04110_13 |
| SMAD3  | path:04110_13 |
| SMAD4  | path:04110_13 |
| SP1    | path:04110_13 |
| SP3    | path:04110_13 |
| STAT1  | path:04110_13 |
| TCF7L2 | path:04110_13 |
| TP53   | path:04110_13 |
| YY1    | path:04110_13 |
| ZBTB7A | path:04110_13 |
| ATF2   | path:04110_2  |
| BCL6   | path:04110_2  |
| E2F1   | path:04110_2  |
| MYC    | path:04110_2  |
| NFYA   | path:04110_2  |
| RELA   | path:04110_2  |
| SP1    | path:04110_2  |
| SP3    | path:04110_2  |
| TP53   | path:04110_2  |
| TP63   | path:04110_2  |
| YY1    | path:04110_2  |
| E2F1   | path:04110_4  |
| NFYA   | path:04110_4  |
| SP1    | path:04110_4  |
| SP3    | path:04110_4  |
| ZBTB7A | path:04110_4  |
| AR     | path:04110_5  |
| ATF2   | path:04110_5  |
| BCL6   | path:04110_5  |

|        |              |
|--------|--------------|
| E2F1   | path:04110_5 |
| KLF4   | path:04110_5 |
| MYC    | path:04110_5 |
| NFYA   | path:04110_5 |
| POU2F1 | path:04110_5 |
| RELA   | path:04110_5 |
| SP1    | path:04110_5 |
| SP3    | path:04110_5 |
| TP53   | path:04110_5 |
| TP63   | path:04110_5 |
| YY1    | path:04110_5 |
| ZBTB7A | path:04110_5 |
| E2F1   | path:04110_6 |
| NFYA   | path:04110_6 |
| TP53   | path:04110_6 |
| ATF2   | path:04110_7 |
| BCL6   | path:04110_7 |
| E2F1   | path:04110_7 |
| MYC    | path:04110_7 |
| NFYA   | path:04110_7 |
| RELA   | path:04110_7 |
| SP1    | path:04110_7 |
| SP3    | path:04110_7 |
| TP53   | path:04110_7 |
| TP63   | path:04110_7 |
| AR     | path:04110_9 |
| ATF2   | path:04110_9 |
| BCL6   | path:04110_9 |
| E2F1   | path:04110_9 |
| KLF4   | path:04110_9 |
| MYC    | path:04110_9 |
| NFYA   | path:04110_9 |
| POU2F1 | path:04110_9 |
| RELA   | path:04110_9 |
| SP1    | path:04110_9 |
| SP3    | path:04110_9 |
| STAT1  | path:04110_9 |
| TP53   | path:04110_9 |
| TP63   | path:04110_9 |
| YY1    | path:04110_9 |
| ZBTB7A | path:04110_9 |
| AR     | path:04115_2 |
| BCL6   | path:04115_2 |
| E2F1   | path:04115_2 |

|        |              |
|--------|--------------|
| ESR1   | path:04115_2 |
| FOS    | path:04115_2 |
| JUN    | path:04115_2 |
| KLF4   | path:04115_2 |
| NFIC   | path:04115_2 |
| NFYA   | path:04115_2 |
| RELA   | path:04115_2 |
| SMAD4  | path:04115_2 |
| SP1    | path:04115_2 |
| SP3    | path:04115_2 |
| TP53   | path:04115_2 |
| TP63   | path:04115_2 |
| TP73   | path:04115_2 |
| YY1    | path:04115_2 |
| EGR1   | path:04144_2 |
| SP1    | path:04144_2 |
| SP3    | path:04144_2 |
| TFAP2A | path:04144_2 |
| SPI1   | path:04145_1 |
| SPI1   | path:04145_4 |
| STAT1  | path:04145_4 |
| BCL6   | path:04210_3 |
| RBPJ   | path:04210_3 |
| SP1    | path:04210_4 |
| E2F1   | path:04210_5 |
| RBPJ   | path:04210_5 |
| SP1    | path:04210_5 |
| BCL6   | path:04210_6 |
| RBPJ   | path:04210_6 |
| SP1    | path:04210_6 |
| RBPJ   | path:04210_7 |
| TP53   | path:04210_8 |
| CEBPB  | path:04210_9 |
| JUN    | path:04210_9 |
| SP1    | path:04210_9 |
| TP53   | path:04210_9 |
| ETS2   | path:04310_5 |
| JUN    | path:04310_5 |
| LEF1   | path:04310_5 |
| SP1    | path:04310_5 |
| TCF7L2 | path:04310_5 |
| ETS2   | path:04310_7 |
| FOS    | path:04310_7 |
| JUN    | path:04310_7 |

|        |               |
|--------|---------------|
| LEF1   | path:04310_7  |
| SP1    | path:04310_7  |
| TCF7L2 | path:04310_7  |
| GLI3   | path:04340_1  |
| EGR1   | path:04350_1  |
| POU2F1 | path:04350_1  |
| SP1    | path:04350_1  |
| TCF7L2 | path:04350_1  |
| ZBTB7A | path:04350_1  |
| JUNB   | path:04350_2  |
| JUNB   | path:04350_3  |
| SMAD4  | path:04350_3  |
| ATF2   | path:04350_4  |
| SMAD3  | path:04350_4  |
| SMAD4  | path:04350_4  |
| SP1    | path:04350_4  |
| EGR1   | path:04350_5  |
| SP1    | path:04350_5  |
| NR5A1  | path:04350_6  |
| TP53   | path:04360_3  |
| PAX6   | path:04510_1  |
| SMAD2  | path:04510_1  |
| SMAD3  | path:04510_1  |
| SP1    | path:04510_1  |
| SP3    | path:04510_1  |
| ZBTB7B | path:04510_1  |
| E2F1   | path:04510_10 |
| GLI1   | path:04510_10 |
| SP1    | path:04510_10 |
| EGR1   | path:04510_12 |
| PAX6   | path:04510_12 |
| SP1    | path:04510_12 |
| SP3    | path:04510_12 |
| TFAP2A | path:04510_12 |
| TP53   | path:04510_12 |
| EGR1   | path:04510_13 |
| MYC    | path:04510_13 |
| PAX6   | path:04510_13 |
| SMAD2  | path:04510_13 |
| SMAD4  | path:04510_13 |
| SP1    | path:04510_13 |
| SP3    | path:04510_13 |
| TFAP2A | path:04510_13 |
| TP53   | path:04510_13 |

|        |               |
|--------|---------------|
| ZBTB7B | path:04510_13 |
| PAX6   | path:04510_14 |
| SMAD2  | path:04510_14 |
| SMAD3  | path:04510_14 |
| SP1    | path:04510_14 |
| SP3    | path:04510_14 |
| ZBTB7B | path:04510_14 |
| PAX6   | path:04510_16 |
| SP1    | path:04510_16 |
| SP1    | path:04510_17 |
| SP1    | path:04510_19 |
| TFAP2A | path:04510_19 |
| TP53   | path:04510_19 |
| PAX6   | path:04510_3  |
| SP1    | path:04510_3  |
| PAX6   | path:04510_4  |
| SP1    | path:04510_4  |
| SP3    | path:04510_4  |
| TFAP2A | path:04510_4  |
| TP53   | path:04510_4  |
| EGR1   | path:04510_5  |
| PAX6   | path:04510_5  |
| SMAD2  | path:04510_5  |
| SMAD3  | path:04510_5  |
| SMAD4  | path:04510_5  |
| SP1    | path:04510_5  |
| SP3    | path:04510_5  |
| TFAP2A | path:04510_5  |
| ZBTB7B | path:04510_5  |
| EGR1   | path:04510_6  |
| NFIC   | path:04510_6  |
| PAX6   | path:04510_6  |
| SMAD2  | path:04510_6  |
| SMAD3  | path:04510_6  |
| SMAD4  | path:04510_6  |
| SP1    | path:04510_6  |
| SP3    | path:04510_6  |
| TFAP2A | path:04510_6  |
| TP53   | path:04510_6  |
| ZBTB7B | path:04510_6  |
| EGR1   | path:04510_7  |
| PAX6   | path:04510_7  |
| SMAD2  | path:04510_7  |
| SMAD3  | path:04510_7  |

|        |               |
|--------|---------------|
| SMAD4  | path:04510_7  |
| SP1    | path:04510_7  |
| SP3    | path:04510_7  |
| TFAP2A | path:04510_7  |
| ZBTB7B | path:04510_7  |
| GLI1   | path:04510_8  |
| EGR1   | path:04512_1  |
| FLI1   | path:04512_1  |
| JUN    | path:04512_1  |
| PAX6   | path:04512_1  |
| SMAD2  | path:04512_1  |
| SMAD3  | path:04512_1  |
| SP1    | path:04512_1  |
| SP3    | path:04512_1  |
| ZBTB7B | path:04512_1  |
| EGR1   | path:04512_2  |
| JUN    | path:04512_2  |
| NFIC   | path:04512_2  |
| PAX6   | path:04512_2  |
| SMAD2  | path:04512_2  |
| SMAD3  | path:04512_2  |
| SP1    | path:04512_2  |
| SP3    | path:04512_2  |
| ZBTB7B | path:04512_2  |
| EGR1   | path:04512_3  |
| FLI1   | path:04512_3  |
| JUN    | path:04512_3  |
| PAX6   | path:04512_3  |
| SMAD2  | path:04512_3  |
| SMAD3  | path:04512_3  |
| SP1    | path:04512_3  |
| SP3    | path:04512_3  |
| ZBTB7B | path:04512_3  |
| PAX6   | path:04514_17 |
| CREB1  | path:04514_19 |
| RFX1   | path:04514_19 |
| RFX2   | path:04514_19 |
| RFX3   | path:04514_19 |
| XBP1   | path:04514_19 |
| PAX6   | path:04514_5  |
| SP1    | path:04520_2  |
| TFAP2A | path:04520_2  |
| TFAP2A | path:04520_3  |
| SP1    | path:04520_5  |

|        |              |
|--------|--------------|
| TFAP2A | path:04520_5 |
| TFAP2A | path:04520_7 |
| SP1    | path:04540_7 |
| CEBPA  | path:04610_1 |
| ETS1   | path:04610_1 |
| FOXA2  | path:04610_1 |
| HNF4A  | path:04610_1 |
| SP1    | path:04610_1 |
| CEBPA  | path:04610_2 |
| ESR1   | path:04610_2 |
| ETS1   | path:04610_2 |
| FOXA2  | path:04610_2 |
| HNF1A  | path:04610_2 |
| HNF4A  | path:04610_2 |
| SP1    | path:04610_2 |
| SP3    | path:04610_2 |
| CEBPA  | path:04610_3 |
| ETS1   | path:04610_3 |
| FOXA2  | path:04610_3 |
| HNF1A  | path:04610_3 |
| HNF4A  | path:04610_3 |
| SP1    | path:04610_3 |
| CEBPA  | path:04610_4 |
| CEBPB  | path:04610_4 |
| ETS1   | path:04610_4 |
| FOXA2  | path:04610_4 |
| HNF1A  | path:04610_4 |
| HNF4A  | path:04610_4 |
| SP1    | path:04610_4 |
| CEBPA  | path:04610_5 |
| FOXA2  | path:04610_5 |
| HNF4A  | path:04610_5 |
| SP1    | path:04610_5 |
| ESR1   | path:04610_6 |
| FOS    | path:04610_6 |
| HNF1A  | path:04610_6 |
| HNF4A  | path:04610_6 |
| JUN    | path:04610_6 |
| SP1    | path:04610_6 |
| SP3    | path:04610_6 |
| ESR1   | path:04610_7 |
| FOS    | path:04610_7 |
| HNF4A  | path:04610_7 |
| JUN    | path:04610_7 |

|       |               |
|-------|---------------|
| SP1   | path:04610_7  |
| SP3   | path:04610_7  |
| CREB1 | path:04612_3  |
| RFX1  | path:04612_3  |
| RFX2  | path:04612_3  |
| RFX3  | path:04612_3  |
| XBP1  | path:04612_3  |
| ETS1  | path:04612_4  |
| GATA3 | path:04612_4  |
| RUNX3 | path:04612_4  |
| ATF2  | path:04612_5  |
| JUN   | path:04612_5  |
| REL   | path:04612_5  |
| RELA  | path:04612_5  |
| ATF2  | path:04620_1  |
| CEBPB | path:04620_1  |
| ETS1  | path:04620_1  |
| IRF1  | path:04620_1  |
| IRF2  | path:04620_1  |
| IRF3  | path:04620_1  |
| IRF5  | path:04620_1  |
| IRF7  | path:04620_1  |
| JUN   | path:04620_1  |
| RBPJ  | path:04620_1  |
| REL   | path:04620_1  |
| RELA  | path:04620_1  |
| SPI1  | path:04620_1  |
| STAT1 | path:04620_1  |
| IRF1  | path:04620_10 |
| RBPJ  | path:04620_12 |
| IRF1  | path:04620_13 |
| IRF1  | path:04620_2  |
| IRF3  | path:04620_2  |
| IRF5  | path:04620_2  |
| IRF7  | path:04620_2  |
| RBPJ  | path:04620_2  |
| ATF2  | path:04620_3  |
| CEBPB | path:04620_3  |
| ETS1  | path:04620_3  |
| IRF1  | path:04620_3  |
| IRF2  | path:04620_3  |
| IRF3  | path:04620_3  |
| IRF5  | path:04620_3  |
| IRF7  | path:04620_3  |



|        |              |
|--------|--------------|
| JUN    | path:04620_3 |
| RBPJ   | path:04620_3 |
| REL    | path:04620_3 |
| RELA   | path:04620_3 |
| SPI1   | path:04620_3 |
| ATF2   | path:04620_4 |
| CEBPB  | path:04620_4 |
| CREB1  | path:04620_4 |
| IRF1   | path:04620_4 |
| IRF2   | path:04620_4 |
| IRF3   | path:04620_4 |
| IRF5   | path:04620_4 |
| IRF7   | path:04620_4 |
| JUN    | path:04620_4 |
| POU2F1 | path:04620_4 |
| RBPJ   | path:04620_4 |
| REL    | path:04620_4 |
| RELA   | path:04620_4 |
| SPI1   | path:04620_4 |
| STAT1  | path:04620_4 |
| ATF2   | path:04620_5 |
| CEBPB  | path:04620_5 |
| CREB1  | path:04620_5 |
| ETS1   | path:04620_5 |
| FOS    | path:04620_5 |
| IRF1   | path:04620_5 |
| IRF3   | path:04620_5 |
| IRF7   | path:04620_5 |
| JUN    | path:04620_5 |
| RBPJ   | path:04620_5 |
| RELA   | path:04620_5 |
| SP1    | path:04620_5 |
| STAT1  | path:04620_5 |
| ATF2   | path:04620_6 |
| CEBPB  | path:04620_6 |
| CREB1  | path:04620_6 |
| ETS1   | path:04620_6 |
| FOS    | path:04620_6 |
| IRF1   | path:04620_6 |
| IRF3   | path:04620_6 |
| IRF7   | path:04620_6 |
| JUN    | path:04620_6 |
| RBPJ   | path:04620_6 |
| RELA   | path:04620_6 |

|        |              |
|--------|--------------|
| SP1    | path:04620_6 |
| STAT1  | path:04620_6 |
| IRF1   | path:04620_7 |
| IRF3   | path:04620_7 |
| IRF5   | path:04620_7 |
| IRF7   | path:04620_7 |
| RELA   | path:04620_7 |
| ATF2   | path:04620_8 |
| CEBPB  | path:04620_8 |
| CREB1  | path:04620_8 |
| FOS    | path:04620_8 |
| IRF1   | path:04620_8 |
| IRF3   | path:04620_8 |
| IRF7   | path:04620_8 |
| JUN    | path:04620_8 |
| RBPJ   | path:04620_8 |
| RELA   | path:04620_8 |
| SP1    | path:04620_8 |
| STAT1  | path:04620_8 |
| ATF2   | path:04620_9 |
| CEBPB  | path:04620_9 |
| CREB1  | path:04620_9 |
| ETS1   | path:04620_9 |
| FOS    | path:04620_9 |
| IRF1   | path:04620_9 |
| IRF3   | path:04620_9 |
| IRF7   | path:04620_9 |
| JUN    | path:04620_9 |
| RBPJ   | path:04620_9 |
| RELA   | path:04620_9 |
| SP1    | path:04620_9 |
| STAT1  | path:04620_9 |
| RBPJ   | path:04621_3 |
| RBPJ   | path:04622_2 |
| RBPJ   | path:04622_4 |
| RBPJ   | path:04622_5 |
| RBPJ   | path:04623_2 |
| RBPJ   | path:04623_4 |
| BCL6   | path:04630_1 |
| SP1    | path:04630_1 |
| STAT1  | path:04630_1 |
| STAT3  | path:04630_1 |
| STAT5A | path:04630_1 |
| STAT5B | path:04630_1 |

|        |               |
|--------|---------------|
| TCF7L2 | path:04630_1  |
| SP1    | path:04630_2  |
| STAT1  | path:04630_2  |
| STAT3  | path:04630_2  |
| STAT4  | path:04630_2  |
| STAT5A | path:04630_2  |
| STAT5B | path:04630_2  |
| STAT6  | path:04630_2  |
| SPI1   | path:04650_1  |
| ELF1   | path:04650_10 |
| REL    | path:04650_13 |
| RELA   | path:04650_13 |
| REL    | path:04650_14 |
| RELA   | path:04650_14 |
| ATF2   | path:04650_15 |
| REL    | path:04650_15 |
| RELA   | path:04650_15 |
| ELF1   | path:04650_2  |
| ATF2   | path:04650_3  |
| IRF3   | path:04650_3  |
| IRF5   | path:04650_3  |
| IRF7   | path:04650_3  |
| JUN    | path:04650_3  |
| RELA   | path:04650_3  |
| SP1    | path:04650_3  |
| TP53   | path:04650_3  |
| YY1    | path:04650_3  |
| ELF1   | path:04650_4  |
| ATF2   | path:04650_5  |
| IRF3   | path:04650_5  |
| IRF5   | path:04650_5  |
| IRF7   | path:04650_5  |
| JUN    | path:04650_5  |
| REL    | path:04650_5  |
| RELA   | path:04650_5  |
| YY1    | path:04650_5  |
| SPI1   | path:04650_7  |
| ELF1   | path:04650_8  |
| ELF1   | path:04650_9  |
| RBPJ   | path:04660_1  |
| NFIC   | path:04660_10 |
| TCF7   | path:04660_15 |
| NFIC   | path:04660_9  |
| SP1    | path:04660_9  |

|        |               |
|--------|---------------|
| RBPJ   | path:04662_1  |
| NFIC   | path:04662_5  |
| NFIC   | path:04662_9  |
| SP1    | path:04662_9  |
| ELF1   | path:04664_1  |
| POU2F1 | path:04664_1  |
| ELF1   | path:04664_2  |
| ELF1   | path:04664_6  |
| FOS    | path:04670_2  |
| JUN    | path:04670_2  |
| PAX6   | path:04670_2  |
| RELA   | path:04670_2  |
| SPI1   | path:04670_2  |
| STAT1  | path:04670_2  |
| PAX6   | path:04670_4  |
| RELA   | path:04670_4  |
| SPI1   | path:04670_4  |
| STAT1  | path:04670_4  |
| RELA   | path:04670_6  |
| SPI1   | path:04670_6  |
| STAT1  | path:04670_6  |
| RELA   | path:04670_8  |
| SPI1   | path:04670_8  |
| STAT1  | path:04670_8  |
| PAX6   | path:04670_9  |
| RELA   | path:04670_9  |
| SPI1   | path:04670_9  |
| STAT1  | path:04670_9  |
| RBPJ   | path:04722_10 |
| NFIC   | path:04722_15 |
| SP1    | path:04722_15 |
| TP53   | path:04722_15 |
| TP73   | path:04722_15 |
| RBPJ   | path:04722_16 |
| RBPJ   | path:04722_9  |
| PAX6   | path:04810_16 |
| SP1    | path:04810_16 |
| SP3    | path:04810_16 |
| SPI1   | path:04810_16 |
| SREBF1 | path:04910_1  |
| SREBF1 | path:04910_4  |
| SP1    | path:04912_7  |
| TFAP2A | path:04912_7  |
| TFAP2C | path:04912_7  |

|       |              |
|-------|--------------|
| TP53  | path:04912_7 |
| LEF1  | path:04916_3 |
| MITF  | path:04916_3 |
| LEF1  | path:04916_6 |
| MITF  | path:04916_6 |
| LEF1  | path:04916_8 |
| MITF  | path:04916_8 |
| RBPJ  | path:04920_1 |
| FOXO3 | path:04920_2 |
| RBPJ  | path:04920_6 |
| RBPJ  | path:04920_7 |
| JUN   | path:04940_2 |
| SP1   | path:04940_2 |
| HNF4A | path:04950_2 |
| HNF1A | path:04950_3 |
| HNF4A | path:04950_3 |
| SP1   | path:05014_1 |
| E2F1  | path:05014_2 |
| SP1   | path:05014_2 |
| TP53  | path:05014_2 |
| SP1   | path:05020_1 |
| EGR1  | path:05020_2 |
| SP1   | path:05020_2 |
| ELK1  | path:05020_3 |
| SRF   | path:05020_3 |
| ATF2  | path:05020_4 |
| ELK1  | path:05020_4 |
| SRF   | path:05020_4 |
| PAX6  | path:05100_6 |
| SP1   | path:05100_6 |
| PAX6  | path:05100_7 |
| ELK1  | path:05110_3 |
| RBPJ  | path:05120_1 |
| RBPJ  | path:05120_2 |
| JUN   | path:05120_3 |
| RBPJ  | path:05120_3 |
| RBPJ  | path:05120_4 |
| JUN   | path:05120_7 |
| RBPJ  | path:05120_7 |
| RBPJ  | path:05131_5 |
| SPI1  | path:05140_2 |
| SPI1  | path:05140_3 |
| SP1   | path:05140_4 |
| RBPJ  | path:05140_5 |

|        |               |
|--------|---------------|
| SP1    | path:05140_6  |
| ATF2   | path:05142_11 |
| JUN    | path:05142_11 |
| NFATC2 | path:05142_11 |
| SP1    | path:05142_11 |
| RBPJ   | path:05142_12 |
| SP1    | path:05142_12 |
| ATF2   | path:05142_3  |
| CREB1  | path:05142_3  |
| RELA   | path:05142_3  |
| SP1    | path:05142_3  |
| STAT3  | path:05142_3  |
| RBPJ   | path:05142_5  |
| RBPJ   | path:05142_6  |
| SP3    | path:05144_2  |
| KLF4   | path:05145_11 |
| STAT1  | path:05145_12 |
| RBPJ   | path:05145_4  |
| SP1    | path:05145_6  |
| IRF2   | path:05145_8  |
| SP1    | path:05145_8  |
| STAT1  | path:05145_8  |
| SP1    | path:05146_1  |
| SPI1   | path:05146_1  |
| SPI1   | path:05150_4  |
| TP53   | path:05160_10 |
| RBPJ   | path:05160_12 |
| RBPJ   | path:05160_2  |
| IRF1   | path:05160_4  |
| IRF3   | path:05160_4  |
| IRF5   | path:05160_4  |
| IRF7   | path:05160_4  |
| RBPJ   | path:05160_5  |
| RBPJ   | path:05160_6  |
| TP53   | path:05160_9  |
| SP1    | path:05200_1  |
| TP53   | path:05200_1  |
| TP63   | path:05200_1  |
| SP1    | path:05200_10 |
| TFAP2A | path:05200_10 |
| TP53   | path:05200_10 |
| VDR    | path:05200_10 |
| AR     | path:05200_12 |
| AR     | path:05200_13 |

|        |               |
|--------|---------------|
| BCL6   | path:05200_13 |
| E2F1   | path:05200_13 |
| KLF4   | path:05200_13 |
| NFIC   | path:05200_13 |
| RBPJ   | path:05200_13 |
| RELA   | path:05200_13 |
| SP1    | path:05200_13 |
| SP3    | path:05200_13 |
| TP53   | path:05200_13 |
| TP63   | path:05200_13 |
| YY1    | path:05200_13 |
| AR     | path:05200_14 |
| KLF4   | path:05200_14 |
| RBPJ   | path:05200_14 |
| SP1    | path:05200_14 |
| SP3    | path:05200_14 |
| TP53   | path:05200_14 |
| TP63   | path:05200_14 |
| AR     | path:05200_15 |
| ATF2   | path:05200_15 |
| BCL6   | path:05200_15 |
| E2F1   | path:05200_15 |
| ESR1   | path:05200_15 |
| KLF4   | path:05200_15 |
| LEF1   | path:05200_15 |
| MYC    | path:05200_15 |
| MYOD1  | path:05200_15 |
| NFIC   | path:05200_15 |
| POU2F1 | path:05200_15 |
| RBPJ   | path:05200_15 |
| RELA   | path:05200_15 |
| SMAD3  | path:05200_15 |
| SMAD4  | path:05200_15 |
| SP1    | path:05200_15 |
| SP3    | path:05200_15 |
| STAT1  | path:05200_15 |
| STAT3  | path:05200_15 |
| TCF7L2 | path:05200_15 |
| TP53   | path:05200_15 |
| TP63   | path:05200_15 |
| YY1    | path:05200_15 |
| ZBTB7A | path:05200_15 |
| EGR1   | path:05200_16 |
| SP1    | path:05200_16 |

|        |               |
|--------|---------------|
| SP3    | path:05200_16 |
| STAT3  | path:05200_16 |
| TFAP2A | path:05200_16 |
| TP53   | path:05200_16 |
| VDR    | path:05200_16 |
| ETS2   | path:05200_17 |
| SP1    | path:05200_17 |
| TFAP2A | path:05200_17 |
| TP53   | path:05200_17 |
| ATF2   | path:05200_18 |
| E2F1   | path:05200_18 |
| ELK1   | path:05200_18 |
| LEF1   | path:05200_18 |
| MYOD1  | path:05200_18 |
| NFIC   | path:05200_18 |
| POU2F1 | path:05200_18 |
| SMAD3  | path:05200_18 |
| SMAD4  | path:05200_18 |
| SP1    | path:05200_18 |
| SP3    | path:05200_18 |
| STAT1  | path:05200_18 |
| STAT3  | path:05200_18 |
| TCF7L2 | path:05200_18 |
| TP53   | path:05200_18 |
| YY1    | path:05200_18 |
| ZBTB7A | path:05200_18 |
| ETS2   | path:05200_19 |
| SP1    | path:05200_19 |
| TFAP2A | path:05200_19 |
| TP53   | path:05200_19 |
| TP63   | path:05200_19 |
| VDR    | path:05200_19 |
| AR     | path:05200_2  |
| BCL6   | path:05200_2  |
| E2F1   | path:05200_2  |
| ETS2   | path:05200_2  |
| KLF4   | path:05200_2  |
| MYC    | path:05200_2  |
| NFIC   | path:05200_2  |
| RBPJ   | path:05200_2  |
| RELA   | path:05200_2  |
| SP1    | path:05200_2  |
| SP3    | path:05200_2  |
| TFAP2A | path:05200_2  |



|        |               |
|--------|---------------|
| TP53   | path:05200_2  |
| TP63   | path:05200_2  |
| CEBPB  | path:05200_20 |
| POU2F1 | path:05200_20 |
| RBPJ   | path:05200_20 |
| SP1    | path:05200_20 |
| SP3    | path:05200_20 |
| TP53   | path:05200_20 |
| TP63   | path:05200_20 |
| BCL6   | path:05200_21 |
| E2F1   | path:05200_21 |
| ESR1   | path:05200_21 |
| KLF4   | path:05200_21 |
| LEF1   | path:05200_21 |
| MYC    | path:05200_21 |
| NFIC   | path:05200_21 |
| POU2F1 | path:05200_21 |
| RELA   | path:05200_21 |
| SMAD2  | path:05200_21 |
| SP1    | path:05200_21 |
| SP3    | path:05200_21 |
| STAT1  | path:05200_21 |
| STAT3  | path:05200_21 |
| STAT5B | path:05200_21 |
| TCF7L2 | path:05200_21 |
| TP53   | path:05200_21 |
| TP63   | path:05200_21 |
| YY1    | path:05200_21 |
| ZBTB7A | path:05200_21 |
| EGR1   | path:05200_24 |
| ESR1   | path:05200_24 |
| FOS    | path:05200_24 |
| JUND   | path:05200_24 |
| MYC    | path:05200_24 |
| MYOD1  | path:05200_24 |
| NFIC   | path:05200_24 |
| POU2F1 | path:05200_24 |
| SMAD2  | path:05200_24 |
| SMAD3  | path:05200_24 |
| SMAD4  | path:05200_24 |
| SP1    | path:05200_24 |
| SP3    | path:05200_24 |
| STAT1  | path:05200_24 |
| STAT3  | path:05200_24 |

|        |               |
|--------|---------------|
| STAT5B | path:05200_24 |
| TCF7L2 | path:05200_24 |
| TFAP2A | path:05200_24 |
| TP53   | path:05200_24 |
| ZBTB7A | path:05200_24 |
| AR     | path:05200_25 |
| ATF2   | path:05200_25 |
| BCL6   | path:05200_25 |
| CEBPB  | path:05200_25 |
| CREM   | path:05200_25 |
| E2F1   | path:05200_25 |
| EGR1   | path:05200_25 |
| ESR1   | path:05200_25 |
| ETV4   | path:05200_25 |
| FOS    | path:05200_25 |
| FOSL1  | path:05200_25 |
| HIF1A  | path:05200_25 |
| JUN    | path:05200_25 |
| JUND   | path:05200_25 |
| KLF4   | path:05200_25 |
| LEF1   | path:05200_25 |
| MYC    | path:05200_25 |
| MYOD1  | path:05200_25 |
| NFIC   | path:05200_25 |
| POU2F1 | path:05200_25 |
| RBPJ   | path:05200_25 |
| RELA   | path:05200_25 |
| SMAD3  | path:05200_25 |
| SMAD4  | path:05200_25 |
| SP1    | path:05200_25 |
| SP3    | path:05200_25 |
| STAT1  | path:05200_25 |
| STAT3  | path:05200_25 |
| STAT5B | path:05200_25 |
| TCF7L2 | path:05200_25 |
| TFAP2A | path:05200_25 |
| TP53   | path:05200_25 |
| TP63   | path:05200_25 |
| YY1    | path:05200_25 |
| ZBTB7A | path:05200_25 |
| ATF2   | path:05200_26 |
| E2F1   | path:05200_26 |
| ELK1   | path:05200_26 |
| LEF1   | path:05200_26 |

|        |               |
|--------|---------------|
| NFIC   | path:05200_26 |
| POU2F1 | path:05200_26 |
| SMAD2  | path:05200_26 |
| SMAD3  | path:05200_26 |
| SMAD4  | path:05200_26 |
| SP1    | path:05200_26 |
| SP3    | path:05200_26 |
| STAT1  | path:05200_26 |
| STAT3  | path:05200_26 |
| STAT5B | path:05200_26 |
| TCF7L2 | path:05200_26 |
| TFAP2A | path:05200_26 |
| TP53   | path:05200_26 |
| YY1    | path:05200_26 |
| ZBTB7A | path:05200_26 |
| GLI3   | path:05200_27 |
| GLI3   | path:05200_28 |
| EGR1   | path:05200_29 |
| SP1    | path:05200_29 |
| TFAP2A | path:05200_29 |
| TP53   | path:05200_3  |
| TP63   | path:05200_3  |
| EGR1   | path:05200_30 |
| ESR1   | path:05200_30 |
| SMAD2  | path:05200_30 |
| SMAD3  | path:05200_30 |
| SMAD4  | path:05200_30 |
| SP1    | path:05200_30 |
| STAT3  | path:05200_30 |
| TFAP2A | path:05200_30 |
| EGR1   | path:05200_31 |
| SP1    | path:05200_31 |
| SP1    | path:05200_32 |
| CEBPB  | path:05200_33 |
| E2F1   | path:05200_33 |
| KLF4   | path:05200_33 |
| POU2F1 | path:05200_33 |
| RBPJ   | path:05200_33 |
| SP1    | path:05200_33 |
| SP3    | path:05200_33 |
| STAT5B | path:05200_33 |
| TP73   | path:05200_33 |
| LEF1   | path:05200_34 |
| MYC    | path:05200_34 |

|        |               |
|--------|---------------|
| SP1    | path:05200_34 |
| SPI1   | path:05200_34 |
| TCF7L2 | path:05200_34 |
| AR     | path:05200_35 |
| ATF2   | path:05200_35 |
| CEBPB  | path:05200_35 |
| CREM   | path:05200_35 |
| E2F1   | path:05200_35 |
| EGR1   | path:05200_35 |
| ESR1   | path:05200_35 |
| ETV4   | path:05200_35 |
| FOS    | path:05200_35 |
| FOSL1  | path:05200_35 |
| JUN    | path:05200_35 |
| JUND   | path:05200_35 |
| KLF4   | path:05200_35 |
| LEF1   | path:05200_35 |
| MYC    | path:05200_35 |
| POU2F1 | path:05200_35 |
| RBPJ   | path:05200_35 |
| RELA   | path:05200_35 |
| SMAD3  | path:05200_35 |
| SMAD4  | path:05200_35 |
| SP1    | path:05200_35 |
| SP3    | path:05200_35 |
| STAT1  | path:05200_35 |
| STAT3  | path:05200_35 |
| STAT5B | path:05200_35 |
| TCF7L2 | path:05200_35 |
| TFAP2A | path:05200_35 |
| YY1    | path:05200_35 |
| ZBTB7A | path:05200_35 |
| RORA   | path:05200_36 |
| AR     | path:05200_37 |
| ATF2   | path:05200_37 |
| BCL6   | path:05200_37 |
| CEBPB  | path:05200_37 |
| CREM   | path:05200_37 |
| E2F1   | path:05200_37 |
| EGR1   | path:05200_37 |
| ESR1   | path:05200_37 |
| ETV4   | path:05200_37 |
| FOS    | path:05200_37 |
| HIF1A  | path:05200_37 |

|        |               |
|--------|---------------|
| JUN    | path:05200_37 |
| JUND   | path:05200_37 |
| KLF4   | path:05200_37 |
| LEF1   | path:05200_37 |
| MYC    | path:05200_37 |
| NFIC   | path:05200_37 |
| POU2F1 | path:05200_37 |
| RBPJ   | path:05200_37 |
| RELA   | path:05200_37 |
| SMAD3  | path:05200_37 |
| SMAD4  | path:05200_37 |
| SP1    | path:05200_37 |
| SP3    | path:05200_37 |
| STAT1  | path:05200_37 |
| STAT3  | path:05200_37 |
| STAT5B | path:05200_37 |
| TCF7L2 | path:05200_37 |
| TFAP2A | path:05200_37 |
| TP53   | path:05200_37 |
| TP63   | path:05200_37 |
| YY1    | path:05200_37 |
| ZBTB7A | path:05200_37 |
| AR     | path:05200_38 |
| ATF2   | path:05200_38 |
| CREM   | path:05200_38 |
| E2F1   | path:05200_38 |
| ESR1   | path:05200_38 |
| ETV4   | path:05200_38 |
| FOS    | path:05200_38 |
| FOSL1  | path:05200_38 |
| JUN    | path:05200_38 |
| JUND   | path:05200_38 |
| KLF4   | path:05200_38 |
| LEF1   | path:05200_38 |
| MYC    | path:05200_38 |
| MYOD1  | path:05200_38 |
| POU2F1 | path:05200_38 |
| RELA   | path:05200_38 |
| SMAD3  | path:05200_38 |
| SMAD4  | path:05200_38 |
| SP1    | path:05200_38 |
| SP3    | path:05200_38 |
| STAT1  | path:05200_38 |
| STAT3  | path:05200_38 |

|        |               |
|--------|---------------|
| STAT5B | path:05200_38 |
| TCF7L2 | path:05200_38 |
| TFAP2A | path:05200_38 |
| TP53   | path:05200_38 |
| YY1    | path:05200_38 |
| ZBTB7A | path:05200_38 |
| AR     | path:05200_39 |
| ATF2   | path:05200_39 |
| BCL6   | path:05200_39 |
| CEBPB  | path:05200_39 |
| CREM   | path:05200_39 |
| E2F1   | path:05200_39 |
| ESR1   | path:05200_39 |
| ETV4   | path:05200_39 |
| FOS    | path:05200_39 |
| FOSL1  | path:05200_39 |
| HIF1A  | path:05200_39 |
| JUN    | path:05200_39 |
| JUND   | path:05200_39 |
| KLF4   | path:05200_39 |
| LEF1   | path:05200_39 |
| MYC    | path:05200_39 |
| MYOD1  | path:05200_39 |
| NFIC   | path:05200_39 |
| POU2F1 | path:05200_39 |
| RBPJ   | path:05200_39 |
| RELA   | path:05200_39 |
| SMAD3  | path:05200_39 |
| SMAD4  | path:05200_39 |
| SP1    | path:05200_39 |
| SP3    | path:05200_39 |
| STAT1  | path:05200_39 |
| STAT3  | path:05200_39 |
| STAT5B | path:05200_39 |
| TCF7L2 | path:05200_39 |
| TFAP2A | path:05200_39 |
| TP53   | path:05200_39 |
| TP63   | path:05200_39 |
| YY1    | path:05200_39 |
| ZBTB7A | path:05200_39 |
| JUN    | path:05200_41 |
| SP1    | path:05200_41 |
| SP1    | path:05200_42 |
| NFIC   | path:05200_6  |

|        |              |
|--------|--------------|
| SP1    | path:05200_6 |
| TFAP2A | path:05200_6 |
| TP53   | path:05200_6 |
| AR     | path:05200_7 |
| NFIC   | path:05200_7 |
| SP1    | path:05200_7 |
| TFAP2A | path:05200_7 |
| TP53   | path:05200_7 |
| TP63   | path:05200_7 |
| VDR    | path:05200_7 |
| SP1    | path:05200_8 |
| TFAP2A | path:05200_8 |
| TP53   | path:05200_8 |
| AR     | path:05200_9 |
| ETS2   | path:05200_9 |
| KLF4   | path:05200_9 |
| SP1    | path:05200_9 |
| SP3    | path:05200_9 |
| TFAP2A | path:05200_9 |
| TP53   | path:05200_9 |
| TP63   | path:05200_9 |
| ATF2   | path:05210_5 |
| CREM   | path:05210_5 |
| KLF4   | path:05210_5 |
| LEF1   | path:05210_5 |
| MYC    | path:05210_5 |
| SMAD3  | path:05210_5 |
| SMAD4  | path:05210_5 |
| SP1    | path:05210_5 |
| STAT1  | path:05210_5 |
| STAT3  | path:05210_5 |
| TCF7L2 | path:05210_5 |
| ATF2   | path:05210_8 |
| CREM   | path:05210_8 |
| KLF4   | path:05210_8 |
| LEF1   | path:05210_8 |
| MYC    | path:05210_8 |
| SMAD3  | path:05210_8 |
| SMAD4  | path:05210_8 |
| SP1    | path:05210_8 |
| STAT1  | path:05210_8 |
| STAT3  | path:05210_8 |
| TCF7L2 | path:05210_8 |
| SMAD4  | path:05211_5 |

|        |               |
|--------|---------------|
| ETS1   | path:05212_1  |
| SP1    | path:05212_10 |
| ETS1   | path:05212_2  |
| EGR1   | path:05212_3  |
| ETS1   | path:05212_3  |
| SP1    | path:05212_3  |
| TFAP2A | path:05212_3  |
| ETS1   | path:05212_6  |
| EGR1   | path:05212_8  |
| ESR1   | path:05212_8  |
| ETS1   | path:05212_8  |
| SP1    | path:05212_8  |
| TFAP2A | path:05212_8  |
| ATF2   | path:05212_9  |
| E2F1   | path:05212_9  |
| MYC    | path:05212_9  |
| SP1    | path:05212_9  |
| SP3    | path:05212_9  |
| YY1    | path:05212_9  |
| LEF1   | path:05213_1  |
| MYC    | path:05213_1  |
| STAT1  | path:05213_1  |
| TCF7L2 | path:05213_1  |
| TP53   | path:05213_3  |
| SP1    | path:05214_1  |
| TFAP2A | path:05214_1  |
| TP53   | path:05214_1  |
| SP1    | path:05214_2  |
| TFAP2A | path:05214_2  |
| TP53   | path:05214_2  |
| AR     | path:05214_3  |
| ATF2   | path:05214_3  |
| E2F1   | path:05214_3  |
| KLF4   | path:05214_3  |
| MYC    | path:05214_3  |
| NFIC   | path:05214_3  |
| SP1    | path:05214_3  |
| SP3    | path:05214_3  |
| STAT1  | path:05214_3  |
| STAT5B | path:05214_3  |
| TP53   | path:05214_3  |
| TP63   | path:05214_3  |
| YY1    | path:05214_3  |
| ZBTB7A | path:05214_3  |



|        |               |
|--------|---------------|
| AR     | path:05215_1  |
| RBPJ   | path:05215_10 |
| SP1    | path:05215_10 |
| TFAP2A | path:05215_10 |
| TP53   | path:05215_10 |
| TP63   | path:05215_10 |
| RBPJ   | path:05215_2  |
| E2F1   | path:05215_3  |
| ETS1   | path:05215_4  |
| RBPJ   | path:05215_4  |
| SP1    | path:05215_4  |
| TP53   | path:05215_4  |
| TP63   | path:05215_4  |
| LEF1   | path:05215_5  |
| SP1    | path:05215_5  |
| TCF7L2 | path:05215_5  |
| SP1    | path:05215_6  |
| TP53   | path:05215_6  |
| TP63   | path:05215_6  |
| EGR1   | path:05215_7  |
| SP1    | path:05215_7  |
| TFAP2A | path:05215_7  |
| TP53   | path:05215_7  |
| TFAP2A | path:05215_8  |
| AR     | path:05215_9  |
| EGR1   | path:05215_9  |
| ETS1   | path:05215_9  |
| SP1    | path:05215_9  |
| TFAP2A | path:05215_9  |
| TP53   | path:05215_9  |
| TP63   | path:05215_9  |
| AR     | path:05216_3  |
| LEF1   | path:05216_3  |
| MYC    | path:05216_3  |
| POU2F1 | path:05216_3  |
| SP1    | path:05216_3  |
| STAT1  | path:05216_3  |
| TCF7L2 | path:05216_3  |
| GLI3   | path:05217_1  |
| GLI3   | path:05217_2  |
| NFIC   | path:05218_1  |
| SP1    | path:05218_1  |
| SP3    | path:05218_1  |
| STAT5B | path:05218_1  |

|        |              |
|--------|--------------|
| TP53   | path:05218_1 |
| NFIC   | path:05218_2 |
| SP1    | path:05218_2 |
| SP3    | path:05218_2 |
| STAT5B | path:05218_2 |
| TP53   | path:05218_2 |
| E2F1   | path:05218_3 |
| MYC    | path:05218_3 |
| NFIC   | path:05218_3 |
| SP1    | path:05218_3 |
| SP3    | path:05218_3 |
| STAT5B | path:05218_3 |
| TP53   | path:05218_3 |
| TP63   | path:05218_3 |
| YY1    | path:05218_3 |
| ZBTB7A | path:05218_3 |
| EGR1   | path:05218_4 |
| SMAD4  | path:05218_4 |
| SP1    | path:05218_4 |
| STAT3  | path:05218_4 |
| E2F1   | path:05218_5 |
| MYC    | path:05218_5 |
| SP1    | path:05218_5 |
| SP3    | path:05218_5 |
| STAT5B | path:05218_5 |
| TP53   | path:05218_5 |
| TP63   | path:05218_5 |
| YY1    | path:05218_5 |
| ZBTB7A | path:05218_5 |
| TFAP2A | path:05219_2 |
| TFAP2C | path:05219_2 |
| AR     | path:05219_3 |
| ATF2   | path:05219_3 |
| E2F1   | path:05219_3 |
| ESR1   | path:05219_3 |
| FOS    | path:05219_3 |
| KLF4   | path:05219_3 |
| MYC    | path:05219_3 |
| NFIC   | path:05219_3 |
| POU2F1 | path:05219_3 |
| RELA   | path:05219_3 |
| SP1    | path:05219_3 |
| SP3    | path:05219_3 |
| STAT1  | path:05219_3 |

|        |              |
|--------|--------------|
| STAT5B | path:05219_3 |
| TP53   | path:05219_3 |
| TP63   | path:05219_3 |
| YY1    | path:05219_3 |
| ZBTB7A | path:05219_3 |
| AR     | path:05219_5 |
| ATF2   | path:05219_5 |
| E2F1   | path:05219_5 |
| KLF4   | path:05219_5 |
| MYC    | path:05219_5 |
| POU2F1 | path:05219_5 |
| SP1    | path:05219_5 |
| SP3    | path:05219_5 |
| STAT1  | path:05219_5 |
| STAT5B | path:05219_5 |
| TP53   | path:05219_5 |
| TP63   | path:05219_5 |
| YY1    | path:05219_5 |
| ZBTB7A | path:05219_5 |
| AR     | path:05220_4 |
| ATF2   | path:05220_4 |
| E2F1   | path:05220_4 |
| KLF4   | path:05220_4 |
| MYC    | path:05220_4 |
| NFIC   | path:05220_4 |
| SP1    | path:05220_4 |
| SP3    | path:05220_4 |
| STAT1  | path:05220_4 |
| STAT5B | path:05220_4 |
| TP53   | path:05220_4 |
| TP63   | path:05220_4 |
| YY1    | path:05220_4 |
| ZBTB7A | path:05220_4 |
| SP1    | path:05220_5 |
| RBPJ   | path:05220_6 |
| BCL6   | path:05220_8 |
| SP1    | path:05220_8 |
| SP3    | path:05220_8 |
| STAT3  | path:05221_1 |
| AR     | path:05221_2 |
| LEF1   | path:05221_2 |
| MYC    | path:05221_2 |
| SP1    | path:05221_2 |
| TCF7L2 | path:05221_2 |

|        |              |
|--------|--------------|
| E2F1   | path:05222_1 |
| LEF1   | path:05222_1 |
| MYC    | path:05222_1 |
| POU2F1 | path:05222_1 |
| SP1    | path:05222_1 |
| SP3    | path:05222_1 |
| TCF7L2 | path:05222_1 |
| ZBTB7A | path:05222_1 |
| SP1    | path:05222_2 |
| ATF2   | path:05222_5 |
| E2F1   | path:05222_5 |
| LEF1   | path:05222_5 |
| MYC    | path:05222_5 |
| POU2F1 | path:05222_5 |
| SP1    | path:05222_5 |
| STAT1  | path:05222_5 |
| TCF7L2 | path:05222_5 |
| ZBTB7A | path:05222_5 |
| RBPJ   | path:05222_7 |
| RBPJ   | path:05222_8 |
| SP1    | path:05223_1 |
| TFAP2A | path:05223_1 |
| TP53   | path:05223_2 |
| ATF2   | path:05223_3 |
| E2F1   | path:05223_3 |
| MYC    | path:05223_3 |
| SP1    | path:05223_3 |
| SP3    | path:05223_3 |
| E2F1   | path:05223_4 |
| JUN    | path:05320_2 |
| SP1    | path:05320_2 |
| JUN    | path:05330_2 |
| SP1    | path:05330_2 |
| JUN    | path:05332_1 |
| SP1    | path:05332_1 |
| SRF    | path:05410_1 |
| PAX6   | path:05414_2 |
| SP1    | path:05414_2 |
| SP3    | path:05414_2 |
| SRF    | path:05416_1 |

---

Table S8. The detailed information of the co-family TFs regulated sub-pathways of TSN with k=4.

| Family                          | TF   | Subpathway    |
|---------------------------------|------|---------------|
| Steroid hormone receptors (NR3) | AR   | path:05200_35 |
| Steroid hormone receptors (NR3) | AR   | path:05200_15 |
| Steroid hormone receptors (NR3) | AR   | path:04110_10 |
| Steroid hormone receptors (NR3) | AR   | path:05215_9  |
| Steroid hormone receptors (NR3) | AR   | path:05216_3  |
| Steroid hormone receptors (NR3) | AR   | path:05219_5  |
| Steroid hormone receptors (NR3) | AR   | path:05200_7  |
| Steroid hormone receptors (NR3) | AR   | path:05200_38 |
| Steroid hormone receptors (NR3) | AR   | path:05215_1  |
| Steroid hormone receptors (NR3) | AR   | path:05214_3  |
| Steroid hormone receptors (NR3) | AR   | path:05200_13 |
| Steroid hormone receptors (NR3) | AR   | path:05200_14 |
| Steroid hormone receptors (NR3) | AR   | path:05200_12 |
| Steroid hormone receptors (NR3) | AR   | path:04110_1  |
| Steroid hormone receptors (NR3) | AR   | path:05200_37 |
| Steroid hormone receptors (NR3) | AR   | path:05220_4  |
| Steroid hormone receptors (NR3) | AR   | path:04110_13 |
| Steroid hormone receptors (NR3) | AR   | path:05200_25 |
| Steroid hormone receptors (NR3) | AR   | path:05200_9  |
| Steroid hormone receptors (NR3) | AR   | path:05200_39 |
| Steroid hormone receptors (NR3) | AR   | path:04110_9  |
| Steroid hormone receptors (NR3) | AR   | path:05219_3  |
| Steroid hormone receptors (NR3) | AR   | path:04110_5  |
| Steroid hormone receptors (NR3) | AR   | path:05221_2  |
| Steroid hormone receptors (NR3) | AR   | path:05200_2  |
| Steroid hormone receptors (NR3) | AR   | path:04115_2  |
| AP 1                            | ATF2 | path:04650_5  |
| AP 1                            | ATF2 | path:04620_6  |
| AP 1                            | ATF2 | path:04620_8  |
| AP 1                            | ATF2 | path:05200_35 |
| AP 1                            | ATF2 | path:04620_9  |
| AP 1                            | ATF2 | path:04110_7  |
| AP 1                            | ATF2 | path:04620_3  |
| AP 1                            | ATF2 | path:04612_5  |
| AP 1                            | ATF2 | path:05200_25 |
| AP 1                            | ATF2 | path:05200_38 |
| AP 1                            | ATF2 | path:05200_15 |
| AP 1                            | ATF2 | path:00140_1  |
| AP 1                            | ATF2 | path:05210_5  |
| AP 1                            | ATF2 | path:05142_3  |
| AP 1                            | ATF2 | path:04110_11 |
| AP 1                            | ATF2 | path:04650_15 |

|                    |       |               |
|--------------------|-------|---------------|
| AP 1               | ATF2  | path:05200_18 |
| AP 1               | ATF2  | path:04110_1  |
| AP 1               | ATF2  | path:05200_37 |
| AP 1               | ATF2  | path:04110_5  |
| AP 1               | ATF2  | path:04620_4  |
| AP 1               | ATF2  | path:04110_9  |
| AP 1               | ATF2  | path:04110_2  |
| AP 1               | ATF2  | path:04110_10 |
| AP 1               | ATF2  | path:05222_5  |
| AP 1               | ATF2  | path:04010_11 |
| AP 1               | ATF2  | path:04110_13 |
| AP 1               | ATF2  | path:05200_39 |
| AP 1               | ATF2  | path:05020_4  |
| AP 1               | ATF2  | path:05220_4  |
| AP 1               | ATF2  | path:05223_3  |
| AP 1               | ATF2  | path:04010_10 |
| AP 1               | ATF2  | path:05200_26 |
| AP 1               | ATF2  | path:05219_5  |
| AP 1               | ATF2  | path:04620_1  |
| AP 1               | ATF2  | path:05214_3  |
| AP 1               | ATF2  | path:04620_5  |
| AP 1               | ATF2  | path:05210_8  |
| AP 1               | ATF2  | path:04650_3  |
| AP 1               | ATF2  | path:05212_9  |
| AP 1               | ATF2  | path:04350_4  |
| AP 1               | ATF2  | path:05219_3  |
| AP 1               | ATF2  | path:04010_6  |
| AP 1               | ATF2  | path:05142_11 |
| C/EBP like factors | CEBPA | path:04610_1  |
| C/EBP like factors | CEBPA | path:04060_37 |
| C/EBP like factors | CEBPA | path:04610_2  |
| C/EBP like factors | CEBPA | path:04610_3  |
| C/EBP like factors | CEBPA | path:04610_4  |
| C/EBP like factors | CEBPA | path:04610_5  |
| C/EBP like factors | CEBPB | path:04210_9  |
| C/EBP like factors | CEBPB | path:04010_18 |
| C/EBP like factors | CEBPB | path:05200_37 |
| C/EBP like factors | CEBPB | path:04620_1  |
| C/EBP like factors | CEBPB | path:04620_8  |
| C/EBP like factors | CEBPB | path:04620_6  |
| C/EBP like factors | CEBPB | path:04610_4  |
| C/EBP like factors | CEBPB | path:04620_4  |
| C/EBP like factors | CEBPB | path:04060_38 |
| C/EBP like factors | CEBPB | path:04062_2  |

|                                |       |               |
|--------------------------------|-------|---------------|
| C/EBP like factors             | CEBPB | path:05200_20 |
| C/EBP like factors             | CEBPB | path:04620_9  |
| C/EBP like factors             | CEBPB | path:05200_39 |
| C/EBP like factors             | CEBPB | path:05200_25 |
| C/EBP like factors             | CEBPB | path:04062_1  |
| C/EBP like factors             | CEBPB | path:04620_5  |
| C/EBP like factors             | CEBPB | path:05200_33 |
| C/EBP like factors             | CEBPB | path:04620_3  |
| C/EBP like factors             | CEBPB | path:05200_35 |
| CREB                           | CREB1 | path:04514_19 |
| CREB                           | CREB1 | path:04620_9  |
| CREB                           | CREB1 | path:04620_6  |
| CREB                           | CREB1 | path:04620_4  |
| CREB                           | CREB1 | path:04620_8  |
| CREB                           | CREB1 | path:05142_3  |
| CREB                           | CREB1 | path:04620_5  |
| CREB                           | CREB1 | path:04612_3  |
| CREB                           | CREM  | path:05210_5  |
| CREB                           | CREM  | path:05200_35 |
| CREB                           | CREM  | path:05200_38 |
| CREB                           | CREM  | path:05200_39 |
| CREB                           | CREM  | path:05200_25 |
| CREB                           | CREM  | path:05200_37 |
| CREB                           | CREM  | path:05210_8  |
| Cell cycle controlling factors | E2F1  | path:05220_4  |
| Cell cycle controlling factors | E2F1  | path:05218_3  |
| Cell cycle controlling factors | E2F1  | path:05200_15 |
| Cell cycle controlling factors | E2F1  | path:04110_9  |
| Cell cycle controlling factors | E2F1  | path:04110_2  |
| Cell cycle controlling factors | E2F1  | path:04110_13 |
| Cell cycle controlling factors | E2F1  | path:04110_6  |
| Cell cycle controlling factors | E2F1  | path:04110_11 |
| Cell cycle controlling factors | E2F1  | path:05200_2  |
| Cell cycle controlling factors | E2F1  | path:05200_13 |
| Cell cycle controlling factors | E2F1  | path:05214_3  |
| Cell cycle controlling factors | E2F1  | path:04110_7  |
| Cell cycle controlling factors | E2F1  | path:04110_4  |
| Cell cycle controlling factors | E2F1  | path:05200_18 |
| Cell cycle controlling factors | E2F1  | path:05223_3  |
| Cell cycle controlling factors | E2F1  | path:04110_1  |
| Cell cycle controlling factors | E2F1  | path:05219_5  |
| Cell cycle controlling factors | E2F1  | path:05223_4  |
| Cell cycle controlling factors | E2F1  | path:05200_25 |
| Cell cycle controlling factors | E2F1  | path:05200_39 |

|                                       |      |               |
|---------------------------------------|------|---------------|
| Cell cycle controlling factors        | E2F1 | path:05200_26 |
| Cell cycle controlling factors        | E2F1 | path:05200_38 |
| Cell cycle controlling factors        | E2F1 | path:05219_3  |
| Cell cycle controlling factors        | E2F1 | path:05212_9  |
| Cell cycle controlling factors        | E2F1 | path:04210_5  |
| Cell cycle controlling factors        | E2F1 | path:05222_5  |
| Cell cycle controlling factors        | E2F1 | path:05222_1  |
| Cell cycle controlling factors        | E2F1 | path:04110_5  |
| Cell cycle controlling factors        | E2F1 | path:05200_21 |
| Cell cycle controlling factors        | E2F1 | path:04115_2  |
| Cell cycle controlling factors        | E2F1 | path:04510_10 |
| Cell cycle controlling factors        | E2F1 | path:05200_37 |
| Cell cycle controlling factors        | E2F1 | path:05014_2  |
| Cell cycle controlling factors        | E2F1 | path:05200_35 |
| Cell cycle controlling factors        | E2F1 | path:04110_10 |
| Cell cycle controlling factors        | E2F1 | path:05218_5  |
| Cell cycle controlling factors        | E2F1 | path:05200_33 |
| Cell cycle controlling factors        | E2F1 | path:05215_3  |
| Developmental / cell cycle regulators | EGR1 | path:05200_30 |
| Developmental / cell cycle regulators | EGR1 | path:04144_2  |
| Developmental / cell cycle regulators | EGR1 | path:04510_12 |
| Developmental / cell cycle regulators | EGR1 | path:04510_5  |
| Developmental / cell cycle regulators | EGR1 | path:05218_4  |
| Developmental / cell cycle regulators | EGR1 | path:04510_7  |
| Developmental / cell cycle regulators | EGR1 | path:04510_6  |
| Developmental / cell cycle regulators | EGR1 | path:05200_16 |
| Developmental / cell cycle regulators | EGR1 | path:05200_35 |
| Developmental / cell cycle regulators | EGR1 | path:05200_25 |
| Developmental / cell cycle regulators | EGR1 | path:05200_24 |
| Developmental / cell cycle regulators | EGR1 | path:05200_29 |
| Developmental / cell cycle regulators | EGR1 | path:05212_3  |
| Developmental / cell cycle regulators | EGR1 | path:05215_9  |
| Developmental / cell cycle regulators | EGR1 | path:05020_2  |
| Developmental / cell cycle regulators | EGR1 | path:05212_8  |
| Developmental / cell cycle regulators | EGR1 | path:04350_1  |
| Developmental / cell cycle regulators | EGR1 | path:05215_7  |
| Developmental / cell cycle regulators | EGR1 | path:04512_3  |
| Developmental / cell cycle regulators | EGR1 | path:04512_1  |
| Developmental / cell cycle regulators | EGR1 | path:05200_31 |
| Developmental / cell cycle regulators | EGR1 | path:04512_2  |
| Developmental / cell cycle regulators | EGR1 | path:04350_5  |
| Developmental / cell cycle regulators | EGR1 | path:04510_13 |
| Developmental / cell cycle regulators | EGR1 | path:05200_37 |
| Ets type                              | ELF1 | path:04060_34 |



|                                 |      |               |
|---------------------------------|------|---------------|
| Ets type                        | ELF1 | path:04650_4  |
| Ets type                        | ELF1 | path:04664_1  |
| Ets type                        | ELF1 | path:04060_1  |
| Ets type                        | ELF1 | path:04650_8  |
| Ets type                        | ELF1 | path:04650_9  |
| Ets type                        | ELF1 | path:04664_6  |
| Ets type                        | ELF1 | path:04650_2  |
| Ets type                        | ELF1 | path:04664_2  |
| Ets type                        | ELF1 | path:00920_1  |
| Ets type                        | ELF1 | path:04650_10 |
| Steroid hormone receptors (NR3) | ESR1 | path:04610_2  |
| Steroid hormone receptors (NR3) | ESR1 | path:05200_39 |
| Steroid hormone receptors (NR3) | ESR1 | path:00982_2  |
| Steroid hormone receptors (NR3) | ESR1 | path:05200_25 |
| Steroid hormone receptors (NR3) | ESR1 | path:05200_38 |
| Steroid hormone receptors (NR3) | ESR1 | path:05212_8  |
| Steroid hormone receptors (NR3) | ESR1 | path:05200_37 |
| Steroid hormone receptors (NR3) | ESR1 | path:05200_35 |
| Steroid hormone receptors (NR3) | ESR1 | path:05200_15 |
| Steroid hormone receptors (NR3) | ESR1 | path:05219_3  |
| Steroid hormone receptors (NR3) | ESR1 | path:05200_24 |
| Steroid hormone receptors (NR3) | ESR1 | path:00830_1  |
| Steroid hormone receptors (NR3) | ESR1 | path:04115_2  |
| Steroid hormone receptors (NR3) | ESR1 | path:05200_21 |
| Steroid hormone receptors (NR3) | ESR1 | path:00980_1  |
| Steroid hormone receptors (NR3) | ESR1 | path:05200_30 |
| Steroid hormone receptors (NR3) | ESR1 | path:04610_6  |
| Steroid hormone receptors (NR3) | ESR1 | path:04610_7  |
| Ets type                        | ETV4 | path:05200_35 |
| Ets type                        | ETV4 | path:05200_25 |
| Ets type                        | ETV4 | path:05200_37 |
| Ets type                        | ETV4 | path:05200_38 |
| Ets type                        | ETV4 | path:05200_39 |
| AP 1                            | FOS  | path:04620_6  |
| AP 1                            | FOS  | path:04620_9  |
| AP 1                            | FOS  | path:04610_6  |
| AP 1                            | FOS  | path:04310_7  |
| AP 1                            | FOS  | path:05200_35 |
| AP 1                            | FOS  | path:04620_5  |
| AP 1                            | FOS  | path:05200_38 |
| AP 1                            | FOS  | path:05200_25 |
| AP 1                            | FOS  | path:04620_8  |
| AP 1                            | FOS  | path:05200_37 |
| AP 1                            | FOS  | path:05200_24 |

|                                       |       |               |
|---------------------------------------|-------|---------------|
| AP 1                                  | FOS   | path:04610_7  |
| AP 1                                  | FOS   | path:05219_3  |
| AP 1                                  | FOS   | path:05200_39 |
| AP 1                                  | FOS   | path:04115_2  |
| AP 1                                  | FOS   | path:04670_2  |
| Tissue specific regulators            | FOXA2 | path:04610_5  |
| Tissue specific regulators            | FOXA2 | path:04610_1  |
| Tissue specific regulators            | FOXA2 | path:00980_1  |
| Tissue specific regulators            | FOXA2 | path:04610_3  |
| Tissue specific regulators            | FOXA2 | path:04610_2  |
| Tissue specific regulators            | FOXA2 | path:04610_4  |
| Tissue specific regulators            | FOXA3 | path:00830_1  |
| Tissue specific regulators            | FOXA3 | path:00140_1  |
| Tissue specific regulators            | FOXA3 | path:00980_1  |
| Tissue specific regulators            | FOXA3 | path:00591_1  |
| Tissue specific regulators            | FOXA3 | path:00982_2  |
| GATA Factors                          | GATA1 | path:04060_32 |
| GATA Factors                          | GATA2 | path:04060_32 |
| GATA Factors                          | GATA3 | path:04612_4  |
| GATA Factors                          | GATA4 | path:00590_1  |
| GATA Factors                          | GATA4 | path:00982_2  |
| GATA Factors                          | GATA4 | path:00590_2  |
| GATA Factors                          | GATA4 | path:00980_1  |
| GATA Factors                          | GATA4 | path:00591_1  |
| GATA Factors                          | GATA6 | path:00590_1  |
| GATA Factors                          | GATA6 | path:00590_2  |
| GATA Factors                          | GATA6 | path:00591_1  |
| Developmental / cell cycle regulators | GLI1  | path:04510_10 |
| Developmental / cell cycle regulators | GLI1  | path:04510_8  |
| Developmental / cell cycle regulators | GLI3  | path:05217_1  |
| Developmental / cell cycle regulators | GLI3  | path:04340_1  |
| Developmental / cell cycle regulators | GLI3  | path:05200_27 |
| Developmental / cell cycle regulators | GLI3  | path:05200_28 |
| Developmental / cell cycle regulators | GLI3  | path:05217_2  |
| Homeo domain only                     | HNF1A | path:04610_3  |
| Homeo domain only                     | HNF1A | path:00982_2  |
| Homeo domain only                     | HNF1A | path:04950_3  |
| Homeo domain only                     | HNF1A | path:04610_6  |
| Homeo domain only                     | HNF1A | path:04610_2  |
| Homeo domain only                     | HNF1A | path:04610_4  |
| Homeo domain only                     | HNF1A | path:00140_1  |
| Homeo domain only                     | HNF1A | path:00980_1  |
| Steroid hormone receptors (NR3)       | HNF4A | path:00120_1  |
| Steroid hormone receptors (NR3)       | HNF4A | path:04950_3  |

|                                 |       |               |
|---------------------------------|-------|---------------|
| Steroid hormone receptors (NR3) | HNF4A | path:00982_2  |
| Steroid hormone receptors (NR3) | HNF4A | path:00561_2  |
| Steroid hormone receptors (NR3) | HNF4A | path:04610_1  |
| Steroid hormone receptors (NR3) | HNF4A | path:00590_1  |
| Steroid hormone receptors (NR3) | HNF4A | path:00010_1  |
| Steroid hormone receptors (NR3) | HNF4A | path:00591_1  |
| Steroid hormone receptors (NR3) | HNF4A | path:04950_2  |
| Steroid hormone receptors (NR3) | HNF4A | path:04610_6  |
| Steroid hormone receptors (NR3) | HNF4A | path:04610_7  |
| Steroid hormone receptors (NR3) | HNF4A | path:04610_2  |
| Steroid hormone receptors (NR3) | HNF4A | path:00590_2  |
| Steroid hormone receptors (NR3) | HNF4A | path:00140_1  |
| Steroid hormone receptors (NR3) | HNF4A | path:04610_5  |
| Steroid hormone receptors (NR3) | HNF4A | path:00980_1  |
| Steroid hormone receptors (NR3) | HNF4A | path:04610_4  |
| Steroid hormone receptors (NR3) | HNF4A | path:04610_3  |
| Steroid hormone receptors (NR3) | HNF4A | path:03320_1  |
| Steroid hormone receptors (NR3) | HNF4A | path:00830_1  |
| Interferon regulating factors   | IRF1  | path:04620_3  |
| Interferon regulating factors   | IRF1  | path:04620_4  |
| Interferon regulating factors   | IRF1  | path:04060_1  |
| Interferon regulating factors   | IRF1  | path:04620_6  |
| Interferon regulating factors   | IRF1  | path:04620_2  |
| Interferon regulating factors   | IRF1  | path:04620_5  |
| Interferon regulating factors   | IRF1  | path:04620_9  |
| Interferon regulating factors   | IRF1  | path:04620_7  |
| Interferon regulating factors   | IRF1  | path:04060_35 |
| Interferon regulating factors   | IRF1  | path:04620_10 |
| Interferon regulating factors   | IRF1  | path:04620_8  |
| Interferon regulating factors   | IRF1  | path:04620_1  |
| Interferon regulating factors   | IRF1  | path:04620_13 |
| Interferon regulating factors   | IRF1  | path:05160_4  |
| Interferon regulating factors   | IRF3  | path:04620_4  |
| Interferon regulating factors   | IRF3  | path:04650_5  |
| Interferon regulating factors   | IRF3  | path:04620_6  |
| Interferon regulating factors   | IRF3  | path:04650_3  |
| Interferon regulating factors   | IRF3  | path:04060_23 |
| Interferon regulating factors   | IRF3  | path:04620_9  |
| Interferon regulating factors   | IRF3  | path:04620_5  |
| Interferon regulating factors   | IRF3  | path:05160_4  |
| Interferon regulating factors   | IRF3  | path:04620_1  |
| Interferon regulating factors   | IRF3  | path:04620_8  |
| Interferon regulating factors   | IRF3  | path:04620_3  |
| Interferon regulating factors   | IRF3  | path:04620_7  |

|                               |      |               |
|-------------------------------|------|---------------|
| Interferon regulating factors | IRF3 | path:04620_2  |
| Interferon regulating factors | IRF5 | path:04620_4  |
| Interferon regulating factors | IRF5 | path:04620_2  |
| Interferon regulating factors | IRF5 | path:04650_5  |
| Interferon regulating factors | IRF5 | path:05160_4  |
| Interferon regulating factors | IRF5 | path:04620_7  |
| Interferon regulating factors | IRF5 | path:04650_3  |
| Interferon regulating factors | IRF5 | path:04620_1  |
| Interferon regulating factors | IRF5 | path:04060_23 |
| Interferon regulating factors | IRF5 | path:04620_3  |
| Interferon regulating factors | IRF7 | path:04620_8  |
| Interferon regulating factors | IRF7 | path:04620_5  |
| Interferon regulating factors | IRF7 | path:04620_7  |
| Interferon regulating factors | IRF7 | path:05160_4  |
| Interferon regulating factors | IRF7 | path:04650_3  |
| Interferon regulating factors | IRF7 | path:04620_2  |
| Interferon regulating factors | IRF7 | path:04060_23 |
| Interferon regulating factors | IRF7 | path:04620_1  |
| Interferon regulating factors | IRF7 | path:04620_4  |
| Interferon regulating factors | IRF7 | path:04620_6  |
| Interferon regulating factors | IRF7 | path:04650_5  |
| Interferon regulating factors | IRF7 | path:04620_9  |
| Interferon regulating factors | IRF7 | path:04620_3  |
| AP 1                          | JUN  | path:05142_11 |
| AP 1                          | JUN  | path:04620_1  |
| AP 1                          | JUN  | path:05200_38 |
| AP 1                          | JUN  | path:04512_1  |
| AP 1                          | JUN  | path:04620_3  |
| AP 1                          | JUN  | path:04670_2  |
| AP 1                          | JUN  | path:05120_3  |
| AP 1                          | JUN  | path:05200_39 |
| AP 1                          | JUN  | path:04940_2  |
| AP 1                          | JUN  | path:04650_5  |
| AP 1                          | JUN  | path:04310_7  |
| AP 1                          | JUN  | path:04115_2  |
| AP 1                          | JUN  | path:04650_3  |
| AP 1                          | JUN  | path:04610_6  |
| AP 1                          | JUN  | path:04620_9  |
| AP 1                          | JUN  | path:04210_9  |
| AP 1                          | JUN  | path:05200_35 |
| AP 1                          | JUN  | path:04620_5  |
| AP 1                          | JUN  | path:05332_1  |
| AP 1                          | JUN  | path:04620_4  |
| AP 1                          | JUN  | path:05200_37 |

|                                       |      |               |
|---------------------------------------|------|---------------|
| AP 1                                  | JUN  | path:04310_5  |
| AP 1                                  | JUN  | path:05120_7  |
| AP 1                                  | JUN  | path:04620_8  |
| AP 1                                  | JUN  | path:04512_3  |
| AP 1                                  | JUN  | path:04610_7  |
| AP 1                                  | JUN  | path:05200_41 |
| AP 1                                  | JUN  | path:05320_2  |
| AP 1                                  | JUN  | path:04612_5  |
| AP 1                                  | JUN  | path:04512_2  |
| AP 1                                  | JUN  | path:05200_25 |
| AP 1                                  | JUN  | path:05330_2  |
| AP 1                                  | JUN  | path:04620_6  |
| AP 1                                  | JUNB | path:04350_2  |
| AP 1                                  | JUNB | path:04350_3  |
| AP 1                                  | JUND | path:05200_35 |
| AP 1                                  | JUND | path:05200_38 |
| AP 1                                  | JUND | path:05200_37 |
| AP 1                                  | JUND | path:05200_39 |
| AP 1                                  | JUND | path:05200_25 |
| AP 1                                  | JUND | path:05200_24 |
| Developmental / cell cycle regulators | KLF4 | path:04110_11 |
| Developmental / cell cycle regulators | KLF4 | path:04110_9  |
| Developmental / cell cycle regulators | KLF4 | path:05200_2  |
| Developmental / cell cycle regulators | KLF4 | path:05200_25 |
| Developmental / cell cycle regulators | KLF4 | path:04110_10 |
| Developmental / cell cycle regulators | KLF4 | path:05200_38 |
| Developmental / cell cycle regulators | KLF4 | path:05200_14 |
| Developmental / cell cycle regulators | KLF4 | path:05210_8  |
| Developmental / cell cycle regulators | KLF4 | path:05220_4  |
| Developmental / cell cycle regulators | KLF4 | path:05200_37 |
| Developmental / cell cycle regulators | KLF4 | path:05210_5  |
| Developmental / cell cycle regulators | KLF4 | path:05200_35 |
| Developmental / cell cycle regulators | KLF4 | path:05200_33 |
| Developmental / cell cycle regulators | KLF4 | path:04110_5  |
| Developmental / cell cycle regulators | KLF4 | path:05200_9  |
| Developmental / cell cycle regulators | KLF4 | path:05200_21 |
| Developmental / cell cycle regulators | KLF4 | path:05200_13 |
| Developmental / cell cycle regulators | KLF4 | path:05145_11 |
| Developmental / cell cycle regulators | KLF4 | path:04110_1  |
| Developmental / cell cycle regulators | KLF4 | path:05200_15 |
| Developmental / cell cycle regulators | KLF4 | path:05214_3  |
| Developmental / cell cycle regulators | KLF4 | path:04115_2  |
| Developmental / cell cycle regulators | KLF4 | path:05219_5  |
| Developmental / cell cycle regulators | KLF4 | path:04110_13 |

|                                       |      |               |
|---------------------------------------|------|---------------|
| Developmental / cell cycle regulators | KLF4 | path:05219_3  |
| Developmental / cell cycle regulators | KLF4 | path:05200_39 |
| Developmental / cell cycle regulators | KLF5 | path:05200_25 |
| Developmental / cell cycle regulators | KLF5 | path:05210_5  |
| Developmental / cell cycle regulators | KLF5 | path:05200_37 |
| Developmental / cell cycle regulators | KLF5 | path:05210_8  |
| Developmental / cell cycle regulators | KLF5 | path:05200_35 |
| Developmental / cell cycle regulators | KLF5 | path:05200_21 |
| TCF 1                                 | LEF1 | path:05200_25 |
| TCF 1                                 | LEF1 | path:05200_35 |
| TCF 1                                 | LEF1 | path:05200_15 |
| TCF 1                                 | LEF1 | path:05200_38 |
| TCF 1                                 | LEF1 | path:05222_5  |
| TCF 1                                 | LEF1 | path:05200_39 |
| TCF 1                                 | LEF1 | path:05216_3  |
| TCF 1                                 | LEF1 | path:05200_18 |
| TCF 1                                 | LEF1 | path:04310_7  |
| TCF 1                                 | LEF1 | path:05200_37 |
| TCF 1                                 | LEF1 | path:05210_8  |
| TCF 1                                 | LEF1 | path:05215_5  |
| TCF 1                                 | LEF1 | path:05200_34 |
| TCF 1                                 | LEF1 | path:04310_5  |
| TCF 1                                 | LEF1 | path:05210_5  |
| TCF 1                                 | LEF1 | path:05222_1  |
| TCF 1                                 | LEF1 | path:05200_21 |
| TCF 1                                 | LEF1 | path:04916_6  |
| TCF 1                                 | LEF1 | path:04916_8  |
| TCF 1                                 | LEF1 | path:05200_26 |
| TCF 1                                 | LEF1 | path:04916_3  |
| TCF 1                                 | LEF1 | path:05221_2  |
| TCF 1                                 | LEF1 | path:05213_1  |
| Ubiquitous bHLH ZIP factors           | MITF | path:04916_3  |
| Ubiquitous bHLH ZIP factors           | MITF | path:04916_6  |
| Ubiquitous bHLH ZIP factors           | MITF | path:00350_1  |
| Ubiquitous bHLH ZIP factors           | MITF | path:04916_8  |
| Cell cycle controlling factors        | MYC  | path:04110_2  |
| Cell cycle controlling factors        | MYC  | path:05214_3  |
| Cell cycle controlling factors        | MYC  | path:05218_3  |
| Cell cycle controlling factors        | MYC  | path:04110_1  |
| Cell cycle controlling factors        | MYC  | path:05222_1  |
| Cell cycle controlling factors        | MYC  | path:05212_9  |
| Cell cycle controlling factors        | MYC  | path:05220_4  |
| Cell cycle controlling factors        | MYC  | path:04110_13 |
| Cell cycle controlling factors        | MYC  | path:04110_5  |

|                                |        |               |
|--------------------------------|--------|---------------|
| Cell cycle controlling factors | MYC    | path:05200_21 |
| Cell cycle controlling factors | MYC    | path:05200_25 |
| Cell cycle controlling factors | MYC    | path:04110_9  |
| Cell cycle controlling factors | MYC    | path:05223_3  |
| Cell cycle controlling factors | MYC    | path:05210_5  |
| Cell cycle controlling factors | MYC    | path:05200_2  |
| Cell cycle controlling factors | MYC    | path:05219_5  |
| Cell cycle controlling factors | MYC    | path:05210_8  |
| Cell cycle controlling factors | MYC    | path:04510_13 |
| Cell cycle controlling factors | MYC    | path:05219_3  |
| Cell cycle controlling factors | MYC    | path:05200_15 |
| Cell cycle controlling factors | MYC    | path:05222_5  |
| Cell cycle controlling factors | MYC    | path:05200_34 |
| Cell cycle controlling factors | MYC    | path:04110_10 |
| Cell cycle controlling factors | MYC    | path:05213_1  |
| Cell cycle controlling factors | MYC    | path:04110_7  |
| Cell cycle controlling factors | MYC    | path:05200_24 |
| Cell cycle controlling factors | MYC    | path:05200_38 |
| Cell cycle controlling factors | MYC    | path:05218_5  |
| Cell cycle controlling factors | MYC    | path:05200_35 |
| Cell cycle controlling factors | MYC    | path:05221_2  |
| Cell cycle controlling factors | MYC    | path:04110_11 |
| Cell cycle controlling factors | MYC    | path:05216_3  |
| Cell cycle controlling factors | MYC    | path:05200_39 |
| Cell cycle controlling factors | MYC    | path:05200_37 |
| NF AT                          | NFATC1 | path:04060_19 |
| NF AT                          | NFATC1 | path:04060_34 |
| NF AT                          | NFATC1 | path:04060_20 |
| AP 1                           | NFE2L2 | path:00480_1  |
| NF 1                           | NFIC   | path:04080_5  |
| NF 1                           | NFIC   | path:05219_3  |
| NF 1                           | NFIC   | path:05200_7  |
| NF 1                           | NFIC   | path:05200_6  |
| NF 1                           | NFIC   | path:04512_2  |
| NF 1                           | NFIC   | path:04115_2  |
| NF 1                           | NFIC   | path:00591_1  |
| NF 1                           | NFIC   | path:05200_25 |
| NF 1                           | NFIC   | path:04662_9  |
| NF 1                           | NFIC   | path:05200_13 |
| NF 1                           | NFIC   | path:05200_15 |
| NF 1                           | NFIC   | path:05200_18 |
| NF 1                           | NFIC   | path:04662_5  |
| NF 1                           | NFIC   | path:05200_37 |
| NF 1                           | NFIC   | path:05200_24 |

|                                 |       |               |
|---------------------------------|-------|---------------|
| NF 1                            | NFIC  | path:05220_4  |
| NF 1                            | NFIC  | path:04510_6  |
| NF 1                            | NFIC  | path:05218_2  |
| NF 1                            | NFIC  | path:05200_26 |
| NF 1                            | NFIC  | path:05200_39 |
| NF 1                            | NFIC  | path:00140_1  |
| NF 1                            | NFIC  | path:05218_3  |
| NF 1                            | NFIC  | path:05214_3  |
| NF 1                            | NFIC  | path:04722_15 |
| NF 1                            | NFIC  | path:04010_22 |
| NF 1                            | NFIC  | path:04660_10 |
| NF 1                            | NFIC  | path:05200_2  |
| NF 1                            | NFIC  | path:04660_9  |
| NF 1                            | NFIC  | path:05200_21 |
| NF 1                            | NFIC  | path:05218_1  |
| Heteromeric CCAAT factors       | NFYA  | path:04115_2  |
| Heteromeric CCAAT factors       | NFYA  | path:04110_11 |
| Heteromeric CCAAT factors       | NFYA  | path:04110_10 |
| Heteromeric CCAAT factors       | NFYA  | path:04110_1  |
| Heteromeric CCAAT factors       | NFYA  | path:04110_4  |
| Heteromeric CCAAT factors       | NFYA  | path:04110_9  |
| Heteromeric CCAAT factors       | NFYA  | path:04110_6  |
| Heteromeric CCAAT factors       | NFYA  | path:04110_7  |
| Heteromeric CCAAT factors       | NFYA  | path:04110_5  |
| Heteromeric CCAAT factors       | NFYA  | path:04110_2  |
| Steroid hormone receptors (NR3) | NR1I2 | path:00982_2  |
| Steroid hormone receptors (NR3) | NR1I2 | path:00980_1  |
| Steroid hormone receptors (NR3) | NR1I2 | path:00830_1  |
| Steroid hormone receptors (NR3) | NR1I3 | path:00830_1  |
| Steroid hormone receptors (NR3) | NR1I3 | path:00980_1  |
| Steroid hormone receptors (NR3) | NR1I3 | path:00982_2  |
| Steroid hormone receptors (NR3) | NR2F1 | path:03320_1  |
| Steroid hormone receptors (NR3) | NR4A1 | path:00140_1  |
| Steroid hormone receptors (NR3) | NR5A1 | path:04350_6  |
| Steroid hormone receptors (NR3) | NR5A1 | path:04060_2  |
| Steroid hormone receptors (NR3) | NR5A1 | path:00140_1  |
| Steroid hormone receptors (NR3) | NR5A2 | path:03320_1  |
| Steroid hormone receptors (NR3) | NR5A2 | path:00140_1  |
| AP 1                            | NRL   | path:04744_2  |
| Paired plus homeo domain        | PAX6  | path:05100_6  |
| Paired plus homeo domain        | PAX6  | path:04510_5  |
| Paired plus homeo domain        | PAX6  | path:04510_14 |
| Paired plus homeo domain        | PAX6  | path:05414_2  |
| Paired plus homeo domain        | PAX6  | path:04510_13 |



|                          |        |               |
|--------------------------|--------|---------------|
| Paired plus homeo domain | PAX6   | path:04670_2  |
| Paired plus homeo domain | PAX6   | path:05100_7  |
| Paired plus homeo domain | PAX6   | path:04510_1  |
| Paired plus homeo domain | PAX6   | path:04510_7  |
| Paired plus homeo domain | PAX6   | path:04510_4  |
| Paired plus homeo domain | PAX6   | path:04512_2  |
| Paired plus homeo domain | PAX6   | path:04510_3  |
| Paired plus homeo domain | PAX6   | path:04514_17 |
| Paired plus homeo domain | PAX6   | path:04670_9  |
| Paired plus homeo domain | PAX6   | path:04512_1  |
| Paired plus homeo domain | PAX6   | path:04510_12 |
| Paired plus homeo domain | PAX6   | path:04514_5  |
| Paired plus homeo domain | PAX6   | path:04670_4  |
| Paired plus homeo domain | PAX6   | path:04510_16 |
| Paired plus homeo domain | PAX6   | path:04510_6  |
| Paired plus homeo domain | PAX6   | path:04512_3  |
| Paired plus homeo domain | PAX6   | path:04810_16 |
| POU domain factors       | POU2F1 | path:05200_18 |
| POU domain factors       | POU2F1 | path:05200_38 |
| POU domain factors       | POU2F1 | path:05200_33 |
| POU domain factors       | POU2F1 | path:00590_2  |
| POU domain factors       | POU2F1 | path:05200_24 |
| POU domain factors       | POU2F1 | path:04110_13 |
| POU domain factors       | POU2F1 | path:04110_1  |
| POU domain factors       | POU2F1 | path:04620_4  |
| POU domain factors       | POU2F1 | path:04664_1  |
| POU domain factors       | POU2F1 | path:04110_5  |
| POU domain factors       | POU2F1 | path:05216_3  |
| POU domain factors       | POU2F1 | path:00591_1  |
| POU domain factors       | POU2F1 | path:04110_10 |
| POU domain factors       | POU2F1 | path:05200_26 |
| POU domain factors       | POU2F1 | path:05200_25 |
| POU domain factors       | POU2F1 | path:04110_9  |
| POU domain factors       | POU2F1 | path:05219_5  |
| POU domain factors       | POU2F1 | path:00590_1  |
| POU domain factors       | POU2F1 | path:05200_39 |
| POU domain factors       | POU2F1 | path:00830_1  |
| POU domain factors       | POU2F1 | path:05219_3  |
| POU domain factors       | POU2F1 | path:00980_1  |
| POU domain factors       | POU2F1 | path:04110_11 |
| POU domain factors       | POU2F1 | path:05222_5  |
| POU domain factors       | POU2F1 | path:05200_21 |
| POU domain factors       | POU2F1 | path:05222_1  |
| POU domain factors       | POU2F1 | path:04350_1  |

|                    |        |               |
|--------------------|--------|---------------|
| POU domain factors | POU2F1 | path:04060_4  |
| POU domain factors | POU2F1 | path:05200_15 |
| POU domain factors | POU2F1 | path:05200_35 |
| POU domain factors | POU2F1 | path:05200_20 |
| POU domain factors | POU2F1 | path:00982_2  |
| POU domain factors | POU2F1 | path:05200_37 |
| POU domain factors | POU2F1 | path:00232_1  |
| Rel/ankyrin        | REL    | path:04650_14 |
| Rel/ankyrin        | REL    | path:04650_13 |
| Rel/ankyrin        | REL    | path:04650_15 |
| Rel/ankyrin        | REL    | path:04620_1  |
| Rel/ankyrin        | REL    | path:04612_5  |
| Rel/ankyrin        | REL    | path:04650_5  |
| Rel/ankyrin        | REL    | path:04620_4  |
| Rel/ankyrin        | REL    | path:04620_3  |
| Rel/ankyrin        | RELA   | path:04670_8  |
| Rel/ankyrin        | RELA   | path:04060_35 |
| Rel/ankyrin        | RELA   | path:05142_3  |
| Rel/ankyrin        | RELA   | path:04650_15 |
| Rel/ankyrin        | RELA   | path:04110_5  |
| Rel/ankyrin        | RELA   | path:05219_3  |
| Rel/ankyrin        | RELA   | path:04110_1  |
| Rel/ankyrin        | RELA   | path:04060_44 |
| Rel/ankyrin        | RELA   | path:04062_1  |
| Rel/ankyrin        | RELA   | path:05200_35 |
| Rel/ankyrin        | RELA   | path:05200_25 |
| Rel/ankyrin        | RELA   | path:05200_15 |
| Rel/ankyrin        | RELA   | path:04670_2  |
| Rel/ankyrin        | RELA   | path:05200_39 |
| Rel/ankyrin        | RELA   | path:05200_38 |
| Rel/ankyrin        | RELA   | path:04612_5  |
| Rel/ankyrin        | RELA   | path:04670_9  |
| Rel/ankyrin        | RELA   | path:05200_37 |
| Rel/ankyrin        | RELA   | path:04620_4  |
| Rel/ankyrin        | RELA   | path:04110_9  |
| Rel/ankyrin        | RELA   | path:04620_9  |
| Rel/ankyrin        | RELA   | path:04110_10 |
| Rel/ankyrin        | RELA   | path:04062_2  |
| Rel/ankyrin        | RELA   | path:04110_7  |
| Rel/ankyrin        | RELA   | path:04670_6  |
| Rel/ankyrin        | RELA   | path:05200_2  |
| Rel/ankyrin        | RELA   | path:04650_5  |
| Rel/ankyrin        | RELA   | path:04110_11 |
| Rel/ankyrin        | RELA   | path:04620_7  |

|                                        |       |               |
|----------------------------------------|-------|---------------|
| Rel/ankyrin                            | RELA  | path:04110_2  |
| Rel/ankyrin                            | RELA  | path:04620_5  |
| Rel/ankyrin                            | RELA  | path:05200_21 |
| Rel/ankyrin                            | RELA  | path:05200_13 |
| Rel/ankyrin                            | RELA  | path:04650_13 |
| Rel/ankyrin                            | RELA  | path:04620_8  |
| Rel/ankyrin                            | RELA  | path:04620_6  |
| Rel/ankyrin                            | RELA  | path:04650_14 |
| Rel/ankyrin                            | RELA  | path:04115_2  |
| Rel/ankyrin                            | RELA  | path:04620_1  |
| Rel/ankyrin                            | RELA  | path:04650_3  |
| Rel/ankyrin                            | RELA  | path:04620_3  |
| Rel/ankyrin                            | RELA  | path:04670_4  |
| Regulators with a DNA recognition wing | RFX1  | path:04514_19 |
| Regulators with a DNA recognition wing | RFX1  | path:04612_3  |
| Regulators with a DNA recognition wing | RFX2  | path:04514_19 |
| Regulators with a DNA recognition wing | RFX2  | path:04612_3  |
| Regulators with a DNA recognition wing | RFX3  | path:04514_19 |
| Regulators with a DNA recognition wing | RFX3  | path:04612_3  |
| SMAD                                   | SMAD2 | path:04510_14 |
| SMAD                                   | SMAD2 | path:04510_1  |
| SMAD                                   | SMAD2 | path:04510_5  |
| SMAD                                   | SMAD2 | path:04110_10 |
| SMAD                                   | SMAD2 | path:05200_26 |
| SMAD                                   | SMAD2 | path:04512_3  |
| SMAD                                   | SMAD2 | path:04110_13 |
| SMAD                                   | SMAD2 | path:04512_2  |
| SMAD                                   | SMAD2 | path:04510_6  |
| SMAD                                   | SMAD2 | path:05200_24 |
| SMAD                                   | SMAD2 | path:04512_1  |
| SMAD                                   | SMAD2 | path:05200_21 |
| SMAD                                   | SMAD2 | path:04510_7  |
| SMAD                                   | SMAD2 | path:04510_13 |
| SMAD                                   | SMAD2 | path:05200_30 |
| SMAD                                   | SMAD3 | path:04510_1  |
| SMAD                                   | SMAD3 | path:04510_7  |
| SMAD                                   | SMAD3 | path:04510_6  |
| SMAD                                   | SMAD3 | path:05200_15 |
| SMAD                                   | SMAD3 | path:05200_18 |
| SMAD                                   | SMAD3 | path:04512_1  |
| SMAD                                   | SMAD3 | path:05210_8  |
| SMAD                                   | SMAD3 | path:04510_14 |
| SMAD                                   | SMAD3 | path:05200_25 |
| SMAD                                   | SMAD3 | path:04510_5  |

|                    |       |               |
|--------------------|-------|---------------|
| SMAD               | SMAD3 | path:04110_10 |
| SMAD               | SMAD3 | path:04512_2  |
| SMAD               | SMAD3 | path:05200_37 |
| SMAD               | SMAD3 | path:05210_5  |
| SMAD               | SMAD3 | path:04012_7  |
| SMAD               | SMAD3 | path:04110_13 |
| SMAD               | SMAD3 | path:05200_35 |
| SMAD               | SMAD3 | path:05200_39 |
| SMAD               | SMAD3 | path:05200_30 |
| SMAD               | SMAD3 | path:04350_4  |
| SMAD               | SMAD3 | path:04512_3  |
| SMAD               | SMAD3 | path:05200_26 |
| SMAD               | SMAD3 | path:05200_38 |
| SMAD               | SMAD3 | path:05200_24 |
| SMAD               | SMAD4 | path:04110_10 |
| SMAD               | SMAD4 | path:04110_13 |
| SMAD               | SMAD4 | path:05210_5  |
| SMAD               | SMAD4 | path:05200_37 |
| SMAD               | SMAD4 | path:05200_25 |
| SMAD               | SMAD4 | path:04012_7  |
| SMAD               | SMAD4 | path:04510_7  |
| SMAD               | SMAD4 | path:05210_8  |
| SMAD               | SMAD4 | path:04510_13 |
| SMAD               | SMAD4 | path:05200_30 |
| SMAD               | SMAD4 | path:05200_24 |
| SMAD               | SMAD4 | path:05200_39 |
| SMAD               | SMAD4 | path:05200_38 |
| SMAD               | SMAD4 | path:04350_3  |
| SMAD               | SMAD4 | path:04510_5  |
| SMAD               | SMAD4 | path:05200_26 |
| SMAD               | SMAD4 | path:05200_18 |
| SMAD               | SMAD4 | path:05211_5  |
| SMAD               | SMAD4 | path:05200_15 |
| SMAD               | SMAD4 | path:04510_6  |
| SMAD               | SMAD4 | path:04350_4  |
| SMAD               | SMAD4 | path:05200_35 |
| SMAD               | SMAD4 | path:05218_4  |
| SMAD               | SMAD4 | path:04115_2  |
| Ubiquitous factors | SP1   | path:05212_9  |
| Ubiquitous factors | SP1   | path:04610_6  |
| Ubiquitous factors | SP1   | path:05200_30 |
| Ubiquitous factors | SP1   | path:04610_4  |
| Ubiquitous factors | SP1   | path:04540_7  |
| Ubiquitous factors | SP1   | path:05218_4  |

|                    |     |               |
|--------------------|-----|---------------|
| Ubiquitous factors | SP1 | path:05200_6  |
| Ubiquitous factors | SP1 | path:05200_33 |
| Ubiquitous factors | SP1 | path:04310_7  |
| Ubiquitous factors | SP1 | path:04512_1  |
| Ubiquitous factors | SP1 | path:04350_1  |
| Ubiquitous factors | SP1 | path:04210_9  |
| Ubiquitous factors | SP1 | path:00140_1  |
| Ubiquitous factors | SP1 | path:05219_5  |
| Ubiquitous factors | SP1 | path:05200_20 |
| Ubiquitous factors | SP1 | path:05145_8  |
| Ubiquitous factors | SP1 | path:05200_21 |
| Ubiquitous factors | SP1 | path:05200_8  |
| Ubiquitous factors | SP1 | path:05223_1  |
| Ubiquitous factors | SP1 | path:04510_5  |
| Ubiquitous factors | SP1 | path:05216_3  |
| Ubiquitous factors | SP1 | path:04620_9  |
| Ubiquitous factors | SP1 | path:05215_7  |
| Ubiquitous factors | SP1 | path:05200_34 |
| Ubiquitous factors | SP1 | path:04810_16 |
| Ubiquitous factors | SP1 | path:04110_10 |
| Ubiquitous factors | SP1 | path:04110_11 |
| Ubiquitous factors | SP1 | path:04620_6  |
| Ubiquitous factors | SP1 | path:04010_6  |
| Ubiquitous factors | SP1 | path:05200_29 |
| Ubiquitous factors | SP1 | path:05020_1  |
| Ubiquitous factors | SP1 | path:05222_2  |
| Ubiquitous factors | SP1 | path:04520_2  |
| Ubiquitous factors | SP1 | path:05200_26 |
| Ubiquitous factors | SP1 | path:05200_37 |
| Ubiquitous factors | SP1 | path:04610_2  |
| Ubiquitous factors | SP1 | path:04110_5  |
| Ubiquitous factors | SP1 | path:05215_10 |
| Ubiquitous factors | SP1 | path:05014_2  |
| Ubiquitous factors | SP1 | path:00330_5  |
| Ubiquitous factors | SP1 | path:05140_4  |
| Ubiquitous factors | SP1 | path:05332_1  |
| Ubiquitous factors | SP1 | path:05220_4  |
| Ubiquitous factors | SP1 | path:04210_5  |
| Ubiquitous factors | SP1 | path:04620_8  |
| Ubiquitous factors | SP1 | path:04110_1  |
| Ubiquitous factors | SP1 | path:05200_31 |
| Ubiquitous factors | SP1 | path:05215_4  |
| Ubiquitous factors | SP1 | path:05200_10 |
| Ubiquitous factors | SP1 | path:04610_5  |

|                    |     |               |
|--------------------|-----|---------------|
| Ubiquitous factors | SP1 | path:05200_16 |
| Ubiquitous factors | SP1 | path:04510_17 |
| Ubiquitous factors | SP1 | path:04110_2  |
| Ubiquitous factors | SP1 | path:05215_5  |
| Ubiquitous factors | SP1 | path:05414_2  |
| Ubiquitous factors | SP1 | path:04630_1  |
| Ubiquitous factors | SP1 | path:05200_7  |
| Ubiquitous factors | SP1 | path:04610_1  |
| Ubiquitous factors | SP1 | path:05214_1  |
| Ubiquitous factors | SP1 | path:04520_5  |
| Ubiquitous factors | SP1 | path:04110_4  |
| Ubiquitous factors | SP1 | path:05220_5  |
| Ubiquitous factors | SP1 | path:05142_11 |
| Ubiquitous factors | SP1 | path:04510_3  |
| Ubiquitous factors | SP1 | path:00330_3  |
| Ubiquitous factors | SP1 | path:05320_2  |
| Ubiquitous factors | SP1 | path:05020_2  |
| Ubiquitous factors | SP1 | path:05330_2  |
| Ubiquitous factors | SP1 | path:05100_6  |
| Ubiquitous factors | SP1 | path:05145_6  |
| Ubiquitous factors | SP1 | path:05212_10 |
| Ubiquitous factors | SP1 | path:05221_2  |
| Ubiquitous factors | SP1 | path:04060_10 |
| Ubiquitous factors | SP1 | path:05214_2  |
| Ubiquitous factors | SP1 | path:04610_3  |
| Ubiquitous factors | SP1 | path:05200_24 |
| Ubiquitous factors | SP1 | path:04060_19 |
| Ubiquitous factors | SP1 | path:05200_14 |
| Ubiquitous factors | SP1 | path:05200_9  |
| Ubiquitous factors | SP1 | path:05210_8  |
| Ubiquitous factors | SP1 | path:04912_7  |
| Ubiquitous factors | SP1 | path:05222_5  |
| Ubiquitous factors | SP1 | path:04210_6  |
| Ubiquitous factors | SP1 | path:04660_9  |
| Ubiquitous factors | SP1 | path:04620_5  |
| Ubiquitous factors | SP1 | path:00330_4  |
| Ubiquitous factors | SP1 | path:05220_8  |
| Ubiquitous factors | SP1 | path:05200_41 |
| Ubiquitous factors | SP1 | path:04010_8  |
| Ubiquitous factors | SP1 | path:04350_5  |
| Ubiquitous factors | SP1 | path:05142_3  |
| Ubiquitous factors | SP1 | path:04110_9  |
| Ubiquitous factors | SP1 | path:05218_1  |
| Ubiquitous factors | SP1 | path:05215_6  |

|                    |     |               |
|--------------------|-----|---------------|
| Ubiquitous factors | SP1 | path:04510_12 |
| Ubiquitous factors | SP1 | path:04510_19 |
| Ubiquitous factors | SP1 | path:05200_42 |
| Ubiquitous factors | SP1 | path:04610_7  |
| Ubiquitous factors | SP1 | path:05200_32 |
| Ubiquitous factors | SP1 | path:05200_17 |
| Ubiquitous factors | SP1 | path:04650_3  |
| Ubiquitous factors | SP1 | path:00330_1  |
| Ubiquitous factors | SP1 | path:05200_1  |
| Ubiquitous factors | SP1 | path:00980_1  |
| Ubiquitous factors | SP1 | path:04350_4  |
| Ubiquitous factors | SP1 | path:04060_32 |
| Ubiquitous factors | SP1 | path:05212_8  |
| Ubiquitous factors | SP1 | path:04060_46 |
| Ubiquitous factors | SP1 | path:05200_19 |
| Ubiquitous factors | SP1 | path:04110_13 |
| Ubiquitous factors | SP1 | path:05214_3  |
| Ubiquitous factors | SP1 | path:04510_6  |
| Ubiquitous factors | SP1 | path:04510_4  |
| Ubiquitous factors | SP1 | path:04510_16 |
| Ubiquitous factors | SP1 | path:04510_1  |
| Ubiquitous factors | SP1 | path:05200_25 |
| Ubiquitous factors | SP1 | path:05222_1  |
| Ubiquitous factors | SP1 | path:05215_9  |
| Ubiquitous factors | SP1 | path:04115_2  |
| Ubiquitous factors | SP1 | path:05200_39 |
| Ubiquitous factors | SP1 | path:05014_1  |
| Ubiquitous factors | SP1 | path:04512_3  |
| Ubiquitous factors | SP1 | path:05219_3  |
| Ubiquitous factors | SP1 | path:04512_2  |
| Ubiquitous factors | SP1 | path:00350_2  |
| Ubiquitous factors | SP1 | path:05200_2  |
| Ubiquitous factors | SP1 | path:04510_14 |
| Ubiquitous factors | SP1 | path:05218_2  |
| Ubiquitous factors | SP1 | path:05212_3  |
| Ubiquitous factors | SP1 | path:05200_13 |
| Ubiquitous factors | SP1 | path:04722_15 |
| Ubiquitous factors | SP1 | path:04210_4  |
| Ubiquitous factors | SP1 | path:05223_3  |
| Ubiquitous factors | SP1 | path:05218_3  |
| Ubiquitous factors | SP1 | path:05146_1  |
| Ubiquitous factors | SP1 | path:05200_35 |
| Ubiquitous factors | SP1 | path:04010_7  |
| Ubiquitous factors | SP1 | path:04662_9  |

|                    |     |               |
|--------------------|-----|---------------|
| Ubiquitous factors | SP1 | path:04630_2  |
| Ubiquitous factors | SP1 | path:05140_6  |
| Ubiquitous factors | SP1 | path:05200_38 |
| Ubiquitous factors | SP1 | path:04144_2  |
| Ubiquitous factors | SP1 | path:04940_2  |
| Ubiquitous factors | SP1 | path:04510_13 |
| Ubiquitous factors | SP1 | path:05210_5  |
| Ubiquitous factors | SP1 | path:04110_7  |
| Ubiquitous factors | SP1 | path:05142_12 |
| Ubiquitous factors | SP1 | path:05200_18 |
| Ubiquitous factors | SP1 | path:04510_7  |
| Ubiquitous factors | SP1 | path:05218_5  |
| Ubiquitous factors | SP1 | path:04060_20 |
| Ubiquitous factors | SP1 | path:00590_2  |
| Ubiquitous factors | SP1 | path:05200_15 |
| Ubiquitous factors | SP1 | path:04310_5  |
| Ubiquitous factors | SP1 | path:04510_10 |
| Ubiquitous factors | SP3 | path:05144_2  |
| Ubiquitous factors | SP3 | path:04110_2  |
| Ubiquitous factors | SP3 | path:00120_1  |
| Ubiquitous factors | SP3 | path:04110_1  |
| Ubiquitous factors | SP3 | path:05200_37 |
| Ubiquitous factors | SP3 | path:04610_7  |
| Ubiquitous factors | SP3 | path:04110_13 |
| Ubiquitous factors | SP3 | path:04510_13 |
| Ubiquitous factors | SP3 | path:04510_5  |
| Ubiquitous factors | SP3 | path:05222_1  |
| Ubiquitous factors | SP3 | path:05200_21 |
| Ubiquitous factors | SP3 | path:05200_14 |
| Ubiquitous factors | SP3 | path:04110_5  |
| Ubiquitous factors | SP3 | path:04144_2  |
| Ubiquitous factors | SP3 | path:05200_38 |
| Ubiquitous factors | SP3 | path:00600_1  |
| Ubiquitous factors | SP3 | path:05200_18 |
| Ubiquitous factors | SP3 | path:05200_39 |
| Ubiquitous factors | SP3 | path:04510_7  |
| Ubiquitous factors | SP3 | path:00140_1  |
| Ubiquitous factors | SP3 | path:04110_7  |
| Ubiquitous factors | SP3 | path:04510_6  |
| Ubiquitous factors | SP3 | path:05200_20 |
| Ubiquitous factors | SP3 | path:05218_5  |
| Ubiquitous factors | SP3 | path:05200_9  |
| Ubiquitous factors | SP3 | path:05218_2  |
| Ubiquitous factors | SP3 | path:05200_15 |



|                    |      |               |
|--------------------|------|---------------|
| Ubiquitous factors | SP3  | path:05200_33 |
| Ubiquitous factors | SP3  | path:04510_4  |
| Ubiquitous factors | SP3  | path:04510_1  |
| Ubiquitous factors | SP3  | path:04510_14 |
| Ubiquitous factors | SP3  | path:04810_16 |
| Ubiquitous factors | SP3  | path:04510_12 |
| Ubiquitous factors | SP3  | path:05200_24 |
| Ubiquitous factors | SP3  | path:05220_8  |
| Ubiquitous factors | SP3  | path:04060_28 |
| Ubiquitous factors | SP3  | path:04110_4  |
| Ubiquitous factors | SP3  | path:04060_20 |
| Ubiquitous factors | SP3  | path:05218_1  |
| Ubiquitous factors | SP3  | path:05220_4  |
| Ubiquitous factors | SP3  | path:05200_16 |
| Ubiquitous factors | SP3  | path:05219_3  |
| Ubiquitous factors | SP3  | path:05200_35 |
| Ubiquitous factors | SP3  | path:00120_2  |
| Ubiquitous factors | SP3  | path:05223_3  |
| Ubiquitous factors | SP3  | path:04512_1  |
| Ubiquitous factors | SP3  | path:04512_2  |
| Ubiquitous factors | SP3  | path:05200_2  |
| Ubiquitous factors | SP3  | path:04610_2  |
| Ubiquitous factors | SP3  | path:04110_10 |
| Ubiquitous factors | SP3  | path:04110_11 |
| Ubiquitous factors | SP3  | path:04115_2  |
| Ubiquitous factors | SP3  | path:04512_3  |
| Ubiquitous factors | SP3  | path:05219_5  |
| Ubiquitous factors | SP3  | path:05212_9  |
| Ubiquitous factors | SP3  | path:05414_2  |
| Ubiquitous factors | SP3  | path:05218_3  |
| Ubiquitous factors | SP3  | path:05214_3  |
| Ubiquitous factors | SP3  | path:05200_13 |
| Ubiquitous factors | SP3  | path:04610_6  |
| Ubiquitous factors | SP3  | path:05200_25 |
| Ubiquitous factors | SP3  | path:04110_9  |
| Ubiquitous factors | SP3  | path:05200_26 |
| Ets type           | SPI1 | path:04670_6  |
| Ets type           | SPI1 | path:05140_2  |
| Ets type           | SPI1 | path:04060_26 |
| Ets type           | SPI1 | path:05150_4  |
| Ets type           | SPI1 | path:04670_4  |
| Ets type           | SPI1 | path:04670_2  |
| Ets type           | SPI1 | path:04620_4  |
| Ets type           | SPI1 | path:04620_1  |

|                                |        |               |
|--------------------------------|--------|---------------|
| Ets type                       | SPI1   | path:04145_1  |
| Ets type                       | SPI1   | path:05140_3  |
| Ets type                       | SPI1   | path:04620_3  |
| Ets type                       | SPI1   | path:05200_34 |
| Ets type                       | SPI1   | path:04670_9  |
| Ets type                       | SPI1   | path:04145_4  |
| Ets type                       | SPI1   | path:04670_8  |
| Ets type                       | SPI1   | path:04650_1  |
| Ets type                       | SPI1   | path:04650_7  |
| Ets type                       | SPI1   | path:05146_1  |
| Ets type                       | SPI1   | path:04810_16 |
| Ubiquitous bHLH ZIP factors    | SREBF1 | path:04910_1  |
| Ubiquitous bHLH ZIP factors    | SREBF1 | path:04910_4  |
| Responders to external signals | SRF    | path:05020_3  |
| Responders to external signals | SRF    | path:05020_4  |
| Responders to external signals | SRF    | path:05416_1  |
| Responders to external signals | SRF    | path:05410_1  |
| STAT                           | STAT1  | path:04145_4  |
| STAT                           | STAT1  | path:04670_2  |
| STAT                           | STAT1  | path:04620_4  |
| STAT                           | STAT1  | path:04670_9  |
| STAT                           | STAT1  | path:05213_1  |
| STAT                           | STAT1  | path:05219_5  |
| STAT                           | STAT1  | path:04110_10 |
| STAT                           | STAT1  | path:05200_18 |
| STAT                           | STAT1  | path:04620_6  |
| STAT                           | STAT1  | path:04620_9  |
| STAT                           | STAT1  | path:05145_8  |
| STAT                           | STAT1  | path:04670_4  |
| STAT                           | STAT1  | path:04670_6  |
| STAT                           | STAT1  | path:05210_5  |
| STAT                           | STAT1  | path:05200_39 |
| STAT                           | STAT1  | path:05219_3  |
| STAT                           | STAT1  | path:05200_26 |
| STAT                           | STAT1  | path:04620_5  |
| STAT                           | STAT1  | path:05200_35 |
| STAT                           | STAT1  | path:05216_3  |
| STAT                           | STAT1  | path:04620_1  |
| STAT                           | STAT1  | path:05210_8  |
| STAT                           | STAT1  | path:04110_9  |
| STAT                           | STAT1  | path:05220_4  |
| STAT                           | STAT1  | path:05214_3  |
| STAT                           | STAT1  | path:05200_38 |
| STAT                           | STAT1  | path:05200_25 |

|      |        |               |
|------|--------|---------------|
| STAT | STAT1  | path:04630_1  |
| STAT | STAT1  | path:04110_11 |
| STAT | STAT1  | path:05200_15 |
| STAT | STAT1  | path:04110_13 |
| STAT | STAT1  | path:04670_8  |
| STAT | STAT1  | path:05145_12 |
| STAT | STAT1  | path:04630_2  |
| STAT | STAT1  | path:04620_8  |
| STAT | STAT1  | path:05222_5  |
| STAT | STAT1  | path:05200_24 |
| STAT | STAT1  | path:05200_21 |
| STAT | STAT1  | path:05200_37 |
| STAT | STAT3  | path:04630_2  |
| STAT | STAT3  | path:05210_5  |
| STAT | STAT3  | path:05200_39 |
| STAT | STAT3  | path:05200_35 |
| STAT | STAT3  | path:05200_38 |
| STAT | STAT3  | path:05200_21 |
| STAT | STAT3  | path:04012_4  |
| STAT | STAT3  | path:05200_30 |
| STAT | STAT3  | path:05142_3  |
| STAT | STAT3  | path:05210_8  |
| STAT | STAT3  | path:05200_15 |
| STAT | STAT3  | path:05200_26 |
| STAT | STAT3  | path:04060_1  |
| STAT | STAT3  | path:05200_25 |
| STAT | STAT3  | path:05200_18 |
| STAT | STAT3  | path:04630_1  |
| STAT | STAT3  | path:05200_24 |
| STAT | STAT3  | path:04060_34 |
| STAT | STAT3  | path:05221_1  |
| STAT | STAT3  | path:05200_37 |
| STAT | STAT3  | path:05200_16 |
| STAT | STAT3  | path:05218_4  |
| STAT | STAT4  | path:04630_2  |
| STAT | STAT5A | path:04630_2  |
| STAT | STAT5A | path:04630_1  |
| STAT | STAT5B | path:05200_25 |
| STAT | STAT5B | path:05200_38 |
| STAT | STAT5B | path:05200_26 |
| STAT | STAT5B | path:05200_35 |
| STAT | STAT5B | path:05218_3  |
| STAT | STAT5B | path:05219_3  |
| STAT | STAT5B | path:05219_5  |

|       |        |               |
|-------|--------|---------------|
| STAT  | STAT5B | path:05218_1  |
| STAT  | STAT5B | path:05200_24 |
| STAT  | STAT5B | path:04630_2  |
| STAT  | STAT5B | path:05200_39 |
| STAT  | STAT5B | path:05214_3  |
| STAT  | STAT5B | path:04630_1  |
| STAT  | STAT5B | path:05200_33 |
| STAT  | STAT5B | path:05220_4  |
| STAT  | STAT5B | path:05200_37 |
| STAT  | STAT5B | path:05200_21 |
| STAT  | STAT5B | path:05218_5  |
| STAT  | STAT5B | path:05218_2  |
| STAT  | STAT6  | path:00590_1  |
| STAT  | STAT6  | path:00590_2  |
| STAT  | STAT6  | path:04630_2  |
| TCF 1 | TCF7   | path:04660_15 |
| AP 2  | TFAP2A | path:05215_7  |
| AP 2  | TFAP2A | path:05200_37 |
| AP 2  | TFAP2A | path:05200_8  |
| AP 2  | TFAP2A | path:05215_9  |
| AP 2  | TFAP2A | path:04520_5  |
| AP 2  | TFAP2A | path:04520_7  |
| AP 2  | TFAP2A | path:04012_5  |
| AP 2  | TFAP2A | path:05200_9  |
| AP 2  | TFAP2A | path:04520_3  |
| AP 2  | TFAP2A | path:05214_2  |
| AP 2  | TFAP2A | path:05215_10 |
| AP 2  | TFAP2A | path:05219_2  |
| AP 2  | TFAP2A | path:05212_8  |
| AP 2  | TFAP2A | path:04510_6  |
| AP 2  | TFAP2A | path:05200_35 |
| AP 2  | TFAP2A | path:05200_7  |
| AP 2  | TFAP2A | path:04080_5  |
| AP 2  | TFAP2A | path:05215_8  |
| AP 2  | TFAP2A | path:05200_19 |
| AP 2  | TFAP2A | path:05200_39 |
| AP 2  | TFAP2A | path:05214_1  |
| AP 2  | TFAP2A | path:05200_17 |
| AP 2  | TFAP2A | path:04510_19 |
| AP 2  | TFAP2A | path:05212_3  |
| AP 2  | TFAP2A | path:05200_16 |
| AP 2  | TFAP2A | path:04144_2  |
| AP 2  | TFAP2A | path:04020_1  |
| AP 2  | TFAP2A | path:04510_4  |

|                                 |        |               |
|---------------------------------|--------|---------------|
| AP 2                            | TFAP2A | path:04912_7  |
| AP 2                            | TFAP2A | path:05223_1  |
| AP 2                            | TFAP2A | path:04510_5  |
| AP 2                            | TFAP2A | path:04010_7  |
| AP 2                            | TFAP2A | path:05200_25 |
| AP 2                            | TFAP2A | path:05200_6  |
| AP 2                            | TFAP2A | path:05200_24 |
| AP 2                            | TFAP2A | path:04510_7  |
| AP 2                            | TFAP2A | path:04520_2  |
| AP 2                            | TFAP2A | path:04510_13 |
| AP 2                            | TFAP2A | path:05200_29 |
| AP 2                            | TFAP2A | path:05200_38 |
| AP 2                            | TFAP2A | path:05200_10 |
| AP 2                            | TFAP2A | path:04510_12 |
| AP 2                            | TFAP2A | path:05200_30 |
| AP 2                            | TFAP2A | path:05200_26 |
| AP 2                            | TFAP2A | path:05200_2  |
| AP 2                            | TFAP2C | path:05219_2  |
| AP 2                            | TFAP2C | path:04912_7  |
| Steroid hormone receptors (NR3) | THRB   | path:04080_2  |
| p53 like                        | TP53   | path:05219_3  |
| p53 like                        | TP53   | path:05220_4  |
| p53 like                        | TP53   | path:05200_26 |
| p53 like                        | TP53   | path:05215_10 |
| p53 like                        | TP53   | path:05200_2  |
| p53 like                        | TP53   | path:04110_7  |
| p53 like                        | TP53   | path:05200_8  |
| p53 like                        | TP53   | path:04110_1  |
| p53 like                        | TP53   | path:05200_25 |
| p53 like                        | TP53   | path:05200_1  |
| p53 like                        | TP53   | path:05200_14 |
| p53 like                        | TP53   | path:05200_17 |
| p53 like                        | TP53   | path:04912_7  |
| p53 like                        | TP53   | path:05218_3  |
| p53 like                        | TP53   | path:05218_2  |
| p53 like                        | TP53   | path:05200_38 |
| p53 like                        | TP53   | path:05215_4  |
| p53 like                        | TP53   | path:04115_2  |
| p53 like                        | TP53   | path:05215_6  |
| p53 like                        | TP53   | path:05223_2  |
| p53 like                        | TP53   | path:05214_3  |
| p53 like                        | TP53   | path:05200_37 |
| p53 like                        | TP53   | path:05215_7  |
| p53 like                        | TP53   | path:05200_10 |

|          |      |               |
|----------|------|---------------|
| p53 like | TP53 | path:05200_19 |
| p53 like | TP53 | path:05160_10 |
| p53 like | TP53 | path:05014_2  |
| p53 like | TP53 | path:05200_13 |
| p53 like | TP53 | path:04360_3  |
| p53 like | TP53 | path:04210_9  |
| p53 like | TP53 | path:05214_2  |
| p53 like | TP53 | path:05200_39 |
| p53 like | TP53 | path:04110_11 |
| p53 like | TP53 | path:05160_9  |
| p53 like | TP53 | path:05200_7  |
| p53 like | TP53 | path:04110_5  |
| p53 like | TP53 | path:05200_3  |
| p53 like | TP53 | path:04210_8  |
| p53 like | TP53 | path:04510_12 |
| p53 like | TP53 | path:05200_24 |
| p53 like | TP53 | path:04110_9  |
| p53 like | TP53 | path:05200_16 |
| p53 like | TP53 | path:04110_6  |
| p53 like | TP53 | path:04110_13 |
| p53 like | TP53 | path:05200_21 |
| p53 like | TP53 | path:04722_15 |
| p53 like | TP53 | path:04650_3  |
| p53 like | TP53 | path:05200_20 |
| p53 like | TP53 | path:04510_13 |
| p53 like | TP53 | path:05200_15 |
| p53 like | TP53 | path:05200_9  |
| p53 like | TP53 | path:05219_5  |
| p53 like | TP53 | path:04510_6  |
| p53 like | TP53 | path:04012_1  |
| p53 like | TP53 | path:05218_5  |
| p53 like | TP53 | path:04510_19 |
| p53 like | TP53 | path:05213_3  |
| p53 like | TP53 | path:04510_4  |
| p53 like | TP53 | path:05200_6  |
| p53 like | TP53 | path:04110_10 |
| p53 like | TP53 | path:04010_11 |
| p53 like | TP53 | path:05200_18 |
| p53 like | TP53 | path:04110_2  |
| p53 like | TP53 | path:04012_5  |
| p53 like | TP53 | path:05218_1  |
| p53 like | TP53 | path:05215_9  |
| p53 like | TP53 | path:05214_1  |
| p53 like | TP63 | path:05220_4  |

|                                 |      |               |
|---------------------------------|------|---------------|
| p53 like                        | TP63 | path:05200_14 |
| p53 like                        | TP63 | path:05200_7  |
| p53 like                        | TP63 | path:05200_37 |
| p53 like                        | TP63 | path:04110_7  |
| p53 like                        | TP63 | path:05200_20 |
| p53 like                        | TP63 | path:05200_15 |
| p53 like                        | TP63 | path:05200_39 |
| p53 like                        | TP63 | path:04110_1  |
| p53 like                        | TP63 | path:05218_3  |
| p53 like                        | TP63 | path:05200_9  |
| p53 like                        | TP63 | path:05214_3  |
| p53 like                        | TP63 | path:05219_3  |
| p53 like                        | TP63 | path:05200_13 |
| p53 like                        | TP63 | path:05215_4  |
| p53 like                        | TP63 | path:05215_10 |
| p53 like                        | TP63 | path:05215_9  |
| p53 like                        | TP63 | path:04115_2  |
| p53 like                        | TP63 | path:05218_5  |
| p53 like                        | TP63 | path:04110_9  |
| p53 like                        | TP63 | path:05200_19 |
| p53 like                        | TP63 | path:04110_5  |
| p53 like                        | TP63 | path:05200_1  |
| p53 like                        | TP63 | path:05200_21 |
| p53 like                        | TP63 | path:05200_3  |
| p53 like                        | TP63 | path:05219_5  |
| p53 like                        | TP63 | path:05200_2  |
| p53 like                        | TP63 | path:04110_11 |
| p53 like                        | TP63 | path:04110_2  |
| p53 like                        | TP63 | path:04110_10 |
| p53 like                        | TP63 | path:05200_25 |
| p53 like                        | TP63 | path:05215_6  |
| p53 like                        | TP73 | path:04722_15 |
| p53 like                        | TP73 | path:05200_33 |
| p53 like                        | TP73 | path:04115_2  |
| Steroid hormone receptors (NR3) | VDR  | path:05200_10 |
| Steroid hormone receptors (NR3) | VDR  | path:05200_16 |
| Steroid hormone receptors (NR3) | VDR  | path:05200_7  |
| Steroid hormone receptors (NR3) | VDR  | path:05200_19 |
| AP 1                            | XBP1 | path:04514_19 |
| AP 1                            | XBP1 | path:04612_3  |
| csd                             | YBX1 | path:04910_13 |
| csd                             | YBX1 | path:05212_4  |
| csd                             | YBX1 | path:04510_12 |
| csd                             | YBX1 | path:04910_8  |

|                    |      |               |
|--------------------|------|---------------|
| csd                | YBX1 | path:05212_1  |
| csd                | YBX1 | path:05223_2  |
| csd                | YBX1 | path:05211_1  |
| csd                | YBX1 | path:04510_19 |
| csd                | YBX1 | path:05215_7  |
| csd                | YBX1 | path:04510_6  |
| csd                | YBX1 | path:04520_3  |
| csd                | YBX1 | path:05212_6  |
| csd                | YBX1 | path:05212_2  |
| csd                | YBX1 | path:04510_7  |
| csd                | YBX1 | path:04520_6  |
| csd                | YBX1 | path:05200_24 |
| csd                | YBX1 | path:04144_2  |
| csd                | YBX1 | path:05200_10 |
| csd                | YBX1 | path:04520_7  |
| csd                | YBX1 | path:04510_4  |
| csd                | YBX1 | path:05211_5  |
| csd                | YBX1 | path:05218_4  |
| csd                | YBX1 | path:04510_5  |
| csd                | YBX1 | path:05212_3  |
| csd                | YBX1 | path:05211_4  |
| csd                | YBX1 | path:05215_9  |
| csd                | YBX1 | path:04520_5  |
| csd                | YBX1 | path:05100_10 |
| csd                | YBX1 | path:05200_8  |
| csd                | YBX1 | path:04510_13 |
| csd                | YBX1 | path:05218_1  |
| csd                | YBX1 | path:05200_16 |
| csd                | YBX1 | path:05212_8  |
| csd                | YBX1 | path:05223_1  |
| csd                | YBX1 | path:05218_2  |
| csd                | YBX1 | path:05100_11 |
| csd                | YBX1 | path:05213_2  |
| csd                | YBX1 | path:05200_29 |
| csd                | YBX1 | path:04910_2  |
| csd                | YBX1 | path:04520_2  |
| Ubiquitous factors | YY1  | path:04110_2  |
| Ubiquitous factors | YY1  | path:04110_13 |
| Ubiquitous factors | YY1  | path:04110_11 |
| Ubiquitous factors | YY1  | path:04115_2  |
| Ubiquitous factors | YY1  | path:04110_10 |
| Ubiquitous factors | YY1  | path:04650_3  |
| Ubiquitous factors | YY1  | path:05200_39 |
| Ubiquitous factors | YY1  | path:05200_35 |



|                    |     |               |
|--------------------|-----|---------------|
| Ubiquitous factors | YY1 | path:05218_3  |
| Ubiquitous factors | YY1 | path:05200_37 |
| Ubiquitous factors | YY1 | path:05218_5  |
| Ubiquitous factors | YY1 | path:05200_18 |
| Ubiquitous factors | YY1 | path:05220_4  |
| Ubiquitous factors | YY1 | path:05200_13 |
| Ubiquitous factors | YY1 | path:05219_5  |
| Ubiquitous factors | YY1 | path:05214_3  |
| Ubiquitous factors | YY1 | path:04110_5  |
| Ubiquitous factors | YY1 | path:05212_9  |
| Ubiquitous factors | YY1 | path:04110_9  |
| Ubiquitous factors | YY1 | path:05219_3  |
| Ubiquitous factors | YY1 | path:04650_5  |
| Ubiquitous factors | YY1 | path:05200_26 |
| Ubiquitous factors | YY1 | path:05200_21 |
| Ubiquitous factors | YY1 | path:05200_25 |
| Ubiquitous factors | YY1 | path:05200_38 |
| Ubiquitous factors | YY1 | path:04110_1  |
| Ubiquitous factors | YY1 | path:05200_15 |

---

Table S9. The detailed information of the co-tissue TFs regulated sub-pathways of TSN with k=4.

| Tissues    | TF     | Subpathway    |
|------------|--------|---------------|
| adipocytes | CEBPA  | path:04060_37 |
| adipocytes | CEBPA  | path:04610_1  |
| adipocytes | CEBPA  | path:04610_4  |
| adipocytes | CEBPA  | path:04610_2  |
| adipocytes | CEBPA  | path:04610_5  |
| adipocytes | CEBPA  | path:04610_3  |
| adrenal    | SREBF1 | path:04910_1  |
| adrenal    | SREBF1 | path:04910_4  |
| B cell     | BCL6   | path:04110_13 |
| B cell     | BCL6   | path:04110_7  |
| B cell     | BCL6   | path:04110_11 |
| B cell     | BCL6   | path:04110_5  |
| B cell     | BCL6   | path:04110_1  |
| B cell     | BCL6   | path:04110_9  |
| B cell     | BCL6   | path:04110_10 |
| B cell     | BCL6   | path:04110_2  |
| B cell     | BCL6   | path:04115_2  |
| B cell     | BCL6   | path:04210_3  |
| B cell     | BCL6   | path:04210_6  |
| B cell     | BCL6   | path:04630_1  |
| B cell     | BCL6   | path:05200_13 |
| B cell     | BCL6   | path:05200_25 |
| B cell     | BCL6   | path:05200_2  |
| B cell     | BCL6   | path:05200_39 |
| B cell     | BCL6   | path:05200_15 |
| B cell     | BCL6   | path:05200_37 |
| B cell     | BCL6   | path:05200_21 |
| B cell     | BCL6   | path:05220_8  |
| B cell     | SPI1   | path:04060_26 |
| B cell     | SPI1   | path:04145_4  |
| B cell     | SPI1   | path:04145_1  |
| B cell     | SPI1   | path:04620_3  |
| B cell     | SPI1   | path:04620_4  |
| B cell     | SPI1   | path:04620_1  |
| B cell     | SPI1   | path:04650_7  |
| B cell     | SPI1   | path:04650_1  |
| B cell     | SPI1   | path:04670_6  |
| B cell     | SPI1   | path:04670_2  |
| B cell     | SPI1   | path:04670_4  |
| B cell     | SPI1   | path:04670_8  |
| B cell     | SPI1   | path:04670_9  |

|        |        |               |
|--------|--------|---------------|
| B cell | SPI1   | path:04810_16 |
| B cell | SPI1   | path:05140_3  |
| B cell | SPI1   | path:05140_2  |
| B cell | SPI1   | path:05146_1  |
| B cell | SPI1   | path:05150_4  |
| B cell | SPI1   | path:05200_34 |
| BL     | ELK1   | path:04010_11 |
| BL     | ELK1   | path:04010_4  |
| BL     | ELK1   | path:05020_4  |
| BL     | ELK1   | path:05020_3  |
| BL     | ELK1   | path:05110_3  |
| BL     | ELK1   | path:05200_18 |
| BL     | ELK1   | path:05200_26 |
| BL     | FLI1   | path:04512_3  |
| BL     | FLI1   | path:04512_1  |
| BL     | TFAP2A | path:04010_7  |
| BL     | TFAP2A | path:04012_5  |
| BL     | TFAP2A | path:04020_1  |
| BL     | TFAP2A | path:04080_5  |
| BL     | TFAP2A | path:04144_2  |
| BL     | TFAP2A | path:04510_5  |
| BL     | TFAP2A | path:04510_4  |
| BL     | TFAP2A | path:04510_19 |
| BL     | TFAP2A | path:04510_13 |
| BL     | TFAP2A | path:04510_12 |
| BL     | TFAP2A | path:04510_7  |
| BL     | TFAP2A | path:04510_6  |
| BL     | TFAP2A | path:04520_2  |
| BL     | TFAP2A | path:04520_7  |
| BL     | TFAP2A | path:04520_5  |
| BL     | TFAP2A | path:04520_3  |
| BL     | TFAP2A | path:04912_7  |
| BL     | TFAP2A | path:05200_24 |
| BL     | TFAP2A | path:05200_19 |
| BL     | TFAP2A | path:05200_6  |
| BL     | TFAP2A | path:05200_7  |
| BL     | TFAP2A | path:05200_38 |
| BL     | TFAP2A | path:05200_35 |
| BL     | TFAP2A | path:05200_26 |
| BL     | TFAP2A | path:05200_39 |
| BL     | TFAP2A | path:05200_29 |
| BL     | TFAP2A | path:05200_25 |
| BL     | TFAP2A | path:05200_8  |
| BL     | TFAP2A | path:05200_37 |

|    |        |               |
|----|--------|---------------|
| BL | TFAP2A | path:05200_17 |
| BL | TFAP2A | path:05200_2  |
| BL | TFAP2A | path:05200_30 |
| BL | TFAP2A | path:05200_9  |
| BL | TFAP2A | path:05200_10 |
| BL | TFAP2A | path:05200_16 |
| BL | TFAP2A | path:05212_3  |
| BL | TFAP2A | path:05212_8  |
| BL | TFAP2A | path:05214_1  |
| BL | TFAP2A | path:05214_2  |
| BL | TFAP2A | path:05215_8  |
| BL | TFAP2A | path:05215_7  |
| BL | TFAP2A | path:05215_9  |
| BL | TFAP2A | path:05215_10 |
| BL | TFAP2A | path:05219_2  |
| BL | TFAP2A | path:05223_1  |
| BL | TP53   | path:04010_11 |
| BL | TP53   | path:04012_5  |
| BL | TP53   | path:04012_1  |
| BL | TP53   | path:04110_10 |
| BL | TP53   | path:04110_13 |
| BL | TP53   | path:04110_5  |
| BL | TP53   | path:04110_11 |
| BL | TP53   | path:04110_2  |
| BL | TP53   | path:04110_6  |
| BL | TP53   | path:04110_7  |
| BL | TP53   | path:04110_1  |
| BL | TP53   | path:04110_9  |
| BL | TP53   | path:04115_2  |
| BL | TP53   | path:04210_9  |
| BL | TP53   | path:04210_8  |
| BL | TP53   | path:04360_3  |
| BL | TP53   | path:04510_19 |
| BL | TP53   | path:04510_13 |
| BL | TP53   | path:04510_12 |
| BL | TP53   | path:04510_4  |
| BL | TP53   | path:04510_6  |
| BL | TP53   | path:04650_3  |
| BL | TP53   | path:04722_15 |
| BL | TP53   | path:04912_7  |
| BL | TP53   | path:05014_2  |
| BL | TP53   | path:05160_10 |
| BL | TP53   | path:05160_9  |
| BL | TP53   | path:05200_7  |

|             |      |               |
|-------------|------|---------------|
| BL          | TP53 | path:05200_15 |
| BL          | TP53 | path:05200_1  |
| BL          | TP53 | path:05200_2  |
| BL          | TP53 | path:05200_18 |
| BL          | TP53 | path:05200_24 |
| BL          | TP53 | path:05200_38 |
| BL          | TP53 | path:05200_19 |
| BL          | TP53 | path:05200_37 |
| BL          | TP53 | path:05200_14 |
| BL          | TP53 | path:05200_26 |
| BL          | TP53 | path:05200_25 |
| BL          | TP53 | path:05200_6  |
| BL          | TP53 | path:05200_10 |
| BL          | TP53 | path:05200_39 |
| BL          | TP53 | path:05200_16 |
| BL          | TP53 | path:05200_17 |
| BL          | TP53 | path:05200_8  |
| BL          | TP53 | path:05200_9  |
| BL          | TP53 | path:05200_20 |
| BL          | TP53 | path:05200_13 |
| BL          | TP53 | path:05200_21 |
| BL          | TP53 | path:05200_3  |
| BL          | TP53 | path:05213_3  |
| BL          | TP53 | path:05214_1  |
| BL          | TP53 | path:05214_2  |
| BL          | TP53 | path:05214_3  |
| BL          | TP53 | path:05215_6  |
| BL          | TP53 | path:05215_4  |
| BL          | TP53 | path:05215_7  |
| BL          | TP53 | path:05215_9  |
| BL          | TP53 | path:05215_10 |
| BL          | TP53 | path:05218_2  |
| BL          | TP53 | path:05218_3  |
| BL          | TP53 | path:05218_1  |
| BL          | TP53 | path:05218_5  |
| BL          | TP53 | path:05219_3  |
| BL          | TP53 | path:05219_5  |
| BL          | TP53 | path:05220_4  |
| BL          | TP53 | path:05223_2  |
| bone marrow | AKNA | path:04060_18 |
| bone marrow | AKNA | path:04514_8  |
| bone marrow | AKNA | path:04672_2  |
| bone marrow | AKNA | path:05144_4  |
| bone marrow | AKNA | path:05145_14 |

|             |      |               |
|-------------|------|---------------|
| bone marrow | AKNA | path:05310_1  |
| bone marrow | AKNA | path:05320_1  |
| bone marrow | AKNA | path:05322_3  |
| bone marrow | AKNA | path:05330_1  |
| bone marrow | AKNA | path:05416_3  |
| bone marrow | FLI1 | path:04512_1  |
| bone marrow | FLI1 | path:04512_3  |
| bone marrow | IRF5 | path:04060_23 |
| bone marrow | IRF5 | path:04620_1  |
| bone marrow | IRF5 | path:04620_3  |
| bone marrow | IRF5 | path:04620_7  |
| bone marrow | IRF5 | path:04620_2  |
| bone marrow | IRF5 | path:04620_4  |
| bone marrow | IRF5 | path:04650_5  |
| bone marrow | IRF5 | path:04650_3  |
| bone marrow | IRF5 | path:05160_4  |
| bone marrow | SPI1 | path:04060_26 |
| bone marrow | SPI1 | path:04145_4  |
| bone marrow | SPI1 | path:04145_1  |
| bone marrow | SPI1 | path:04620_3  |
| bone marrow | SPI1 | path:04620_4  |
| bone marrow | SPI1 | path:04620_1  |
| bone marrow | SPI1 | path:04650_7  |
| bone marrow | SPI1 | path:04650_1  |
| bone marrow | SPI1 | path:04670_9  |
| bone marrow | SPI1 | path:04670_6  |
| bone marrow | SPI1 | path:04670_8  |
| bone marrow | SPI1 | path:04670_4  |
| bone marrow | SPI1 | path:04670_2  |
| bone marrow | SPI1 | path:04810_16 |
| bone marrow | SPI1 | path:05140_3  |
| bone marrow | SPI1 | path:05140_2  |
| bone marrow | SPI1 | path:05146_1  |
| bone marrow | SPI1 | path:05150_4  |
| bone marrow | SPI1 | path:05200_34 |
| bone marrow | TP53 | path:04010_11 |
| bone marrow | TP53 | path:04012_1  |
| bone marrow | TP53 | path:04012_5  |
| bone marrow | TP53 | path:04110_11 |
| bone marrow | TP53 | path:04110_2  |
| bone marrow | TP53 | path:04110_10 |
| bone marrow | TP53 | path:04110_1  |
| bone marrow | TP53 | path:04110_9  |
| bone marrow | TP53 | path:04110_7  |

|             |      |               |
|-------------|------|---------------|
| bone marrow | TP53 | path:04110_5  |
| bone marrow | TP53 | path:04110_13 |
| bone marrow | TP53 | path:04110_6  |
| bone marrow | TP53 | path:04115_2  |
| bone marrow | TP53 | path:04210_9  |
| bone marrow | TP53 | path:04210_8  |
| bone marrow | TP53 | path:04360_3  |
| bone marrow | TP53 | path:04510_6  |
| bone marrow | TP53 | path:04510_19 |
| bone marrow | TP53 | path:04510_13 |
| bone marrow | TP53 | path:04510_12 |
| bone marrow | TP53 | path:04510_4  |
| bone marrow | TP53 | path:04650_3  |
| bone marrow | TP53 | path:04722_15 |
| bone marrow | TP53 | path:04912_7  |
| bone marrow | TP53 | path:05014_2  |
| bone marrow | TP53 | path:05160_10 |
| bone marrow | TP53 | path:05160_9  |
| bone marrow | TP53 | path:05200_7  |
| bone marrow | TP53 | path:05200_6  |
| bone marrow | TP53 | path:05200_24 |
| bone marrow | TP53 | path:05200_10 |
| bone marrow | TP53 | path:05200_2  |
| bone marrow | TP53 | path:05200_19 |
| bone marrow | TP53 | path:05200_1  |
| bone marrow | TP53 | path:05200_17 |
| bone marrow | TP53 | path:05200_37 |
| bone marrow | TP53 | path:05200_14 |
| bone marrow | TP53 | path:05200_25 |
| bone marrow | TP53 | path:05200_38 |
| bone marrow | TP53 | path:05200_15 |
| bone marrow | TP53 | path:05200_26 |
| bone marrow | TP53 | path:05200_13 |
| bone marrow | TP53 | path:05200_16 |
| bone marrow | TP53 | path:05200_8  |
| bone marrow | TP53 | path:05200_18 |
| bone marrow | TP53 | path:05200_20 |
| bone marrow | TP53 | path:05200_9  |
| bone marrow | TP53 | path:05200_21 |
| bone marrow | TP53 | path:05200_3  |
| bone marrow | TP53 | path:05200_39 |
| bone marrow | TP53 | path:05213_3  |
| bone marrow | TP53 | path:05214_1  |
| bone marrow | TP53 | path:05214_2  |

|             |        |               |
|-------------|--------|---------------|
| bone marrow | TP53   | path:05214_3  |
| bone marrow | TP53   | path:05215_6  |
| bone marrow | TP53   | path:05215_4  |
| bone marrow | TP53   | path:05215_9  |
| bone marrow | TP53   | path:05215_7  |
| bone marrow | TP53   | path:05215_10 |
| bone marrow | TP53   | path:05218_3  |
| bone marrow | TP53   | path:05218_1  |
| bone marrow | TP53   | path:05218_2  |
| bone marrow | TP53   | path:05218_5  |
| bone marrow | TP53   | path:05219_3  |
| bone marrow | TP53   | path:05219_5  |
| bone marrow | TP53   | path:05220_4  |
| bone marrow | TP53   | path:05223_2  |
| brain       | CREB1  | path:04514_19 |
| brain       | CREB1  | path:04612_3  |
| brain       | CREB1  | path:04620_6  |
| brain       | CREB1  | path:04620_9  |
| brain       | CREB1  | path:04620_8  |
| brain       | CREB1  | path:04620_4  |
| brain       | CREB1  | path:04620_5  |
| brain       | CREB1  | path:05142_3  |
| brain       | FOXO3  | path:04920_2  |
| brain       | NR4A1  | path:00140_1  |
| brain       | SREBF1 | path:04910_4  |
| brain       | SREBF1 | path:04910_1  |
| brain       | TP53   | path:04010_11 |
| brain       | TP53   | path:04012_1  |
| brain       | TP53   | path:04012_5  |
| brain       | TP53   | path:04110_10 |
| brain       | TP53   | path:04110_11 |
| brain       | TP53   | path:04110_2  |
| brain       | TP53   | path:04110_7  |
| brain       | TP53   | path:04110_9  |
| brain       | TP53   | path:04110_13 |
| brain       | TP53   | path:04110_5  |
| brain       | TP53   | path:04110_1  |
| brain       | TP53   | path:04110_6  |
| brain       | TP53   | path:04115_2  |
| brain       | TP53   | path:04210_9  |
| brain       | TP53   | path:04210_8  |
| brain       | TP53   | path:04360_3  |
| brain       | TP53   | path:04510_6  |
| brain       | TP53   | path:04510_19 |



|       |      |               |
|-------|------|---------------|
| brain | TP53 | path:04510_4  |
| brain | TP53 | path:04510_13 |
| brain | TP53 | path:04510_12 |
| brain | TP53 | path:04650_3  |
| brain | TP53 | path:04722_15 |
| brain | TP53 | path:04912_7  |
| brain | TP53 | path:05014_2  |
| brain | TP53 | path:05160_10 |
| brain | TP53 | path:05160_9  |
| brain | TP53 | path:05200_37 |
| brain | TP53 | path:05200_6  |
| brain | TP53 | path:05200_26 |
| brain | TP53 | path:05200_10 |
| brain | TP53 | path:05200_2  |
| brain | TP53 | path:05200_9  |
| brain | TP53 | path:05200_13 |
| brain | TP53 | path:05200_24 |
| brain | TP53 | path:05200_17 |
| brain | TP53 | path:05200_39 |
| brain | TP53 | path:05200_7  |
| brain | TP53 | path:05200_25 |
| brain | TP53 | path:05200_3  |
| brain | TP53 | path:05200_38 |
| brain | TP53 | path:05200_20 |
| brain | TP53 | path:05200_16 |
| brain | TP53 | path:05200_15 |
| brain | TP53 | path:05200_14 |
| brain | TP53 | path:05200_8  |
| brain | TP53 | path:05200_1  |
| brain | TP53 | path:05200_18 |
| brain | TP53 | path:05200_19 |
| brain | TP53 | path:05200_21 |
| brain | TP53 | path:05213_3  |
| brain | TP53 | path:05214_1  |
| brain | TP53 | path:05214_2  |
| brain | TP53 | path:05214_3  |
| brain | TP53 | path:05215_6  |
| brain | TP53 | path:05215_4  |
| brain | TP53 | path:05215_7  |
| brain | TP53 | path:05215_9  |
| brain | TP53 | path:05215_10 |
| brain | TP53 | path:05218_2  |
| brain | TP53 | path:05218_3  |
| brain | TP53 | path:05218_1  |

|               |      |               |
|---------------|------|---------------|
| brain         | TP53 | path:05218_5  |
| brain         | TP53 | path:05219_5  |
| brain         | TP53 | path:05219_3  |
| brain         | TP53 | path:05220_4  |
| brain         | TP53 | path:05223_2  |
| breast        | TCF7 | path:04660_15 |
| breast        | TP63 | path:04110_5  |
| breast        | TP63 | path:04110_10 |
| breast        | TP63 | path:04110_11 |
| breast        | TP63 | path:04110_1  |
| breast        | TP63 | path:04110_2  |
| breast        | TP63 | path:04110_7  |
| breast        | TP63 | path:04110_9  |
| breast        | TP63 | path:04115_2  |
| breast        | TP63 | path:05200_15 |
| breast        | TP63 | path:05200_21 |
| breast        | TP63 | path:05200_7  |
| breast        | TP63 | path:05200_20 |
| breast        | TP63 | path:05200_2  |
| breast        | TP63 | path:05200_39 |
| breast        | TP63 | path:05200_37 |
| breast        | TP63 | path:05200_13 |
| breast        | TP63 | path:05200_9  |
| breast        | TP63 | path:05200_1  |
| breast        | TP63 | path:05200_25 |
| breast        | TP63 | path:05200_14 |
| breast        | TP63 | path:05200_3  |
| breast        | TP63 | path:05200_19 |
| breast        | TP63 | path:05214_3  |
| breast        | TP63 | path:05215_4  |
| breast        | TP63 | path:05215_9  |
| breast        | TP63 | path:05215_10 |
| breast        | TP63 | path:05215_6  |
| breast        | TP63 | path:05218_3  |
| breast        | TP63 | path:05218_5  |
| breast        | TP63 | path:05219_3  |
| breast        | TP63 | path:05219_5  |
| breast        | TP63 | path:05220_4  |
| breast cancer | ETS2 | path:04310_5  |
| breast cancer | ETS2 | path:04310_7  |
| breast cancer | ETS2 | path:05200_19 |
| breast cancer | ETS2 | path:05200_17 |
| breast cancer | ETS2 | path:05200_9  |
| breast cancer | ETS2 | path:05200_2  |

|               |       |               |
|---------------|-------|---------------|
| breast cancer | ETV4  | path:05200_39 |
| breast cancer | ETV4  | path:05200_25 |
| breast cancer | ETV4  | path:05200_38 |
| breast cancer | ETV4  | path:05200_37 |
| breast cancer | ETV4  | path:05200_35 |
| breast cancer | HNF1A | path:00140_1  |
| breast cancer | HNF1A | path:00980_1  |
| breast cancer | HNF1A | path:00982_2  |
| breast cancer | HNF1A | path:04610_2  |
| breast cancer | HNF1A | path:04610_4  |
| breast cancer | HNF1A | path:04610_6  |
| breast cancer | HNF1A | path:04610_3  |
| breast cancer | HNF1A | path:04950_3  |
| Caco          | GATA4 | path:00590_2  |
| Caco          | GATA4 | path:00590_1  |
| Caco          | GATA4 | path:00591_1  |
| Caco          | GATA4 | path:00980_1  |
| Caco          | GATA4 | path:00982_2  |
| Caco          | GATA6 | path:00590_1  |
| Caco          | GATA6 | path:00590_2  |
| Caco          | GATA6 | path:00591_1  |
| Caco          | HNF1A | path:00140_1  |
| Caco          | HNF1A | path:00980_1  |
| Caco          | HNF1A | path:00982_2  |
| Caco          | HNF1A | path:04610_2  |
| Caco          | HNF1A | path:04610_4  |
| Caco          | HNF1A | path:04610_3  |
| Caco          | HNF1A | path:04610_6  |
| Caco          | HNF1A | path:04950_3  |
| colon         | FOXO3 | path:04920_2  |
| colon         | HNF4A | path:00010_1  |
| colon         | HNF4A | path:00120_1  |
| colon         | HNF4A | path:00140_1  |
| colon         | HNF4A | path:00561_2  |
| colon         | HNF4A | path:00590_2  |
| colon         | HNF4A | path:00590_1  |
| colon         | HNF4A | path:00591_1  |
| colon         | HNF4A | path:00830_1  |
| colon         | HNF4A | path:00980_1  |
| colon         | HNF4A | path:00982_2  |
| colon         | HNF4A | path:03320_1  |
| colon         | HNF4A | path:04610_6  |
| colon         | HNF4A | path:04610_7  |
| colon         | HNF4A | path:04610_2  |

|       |       |               |
|-------|-------|---------------|
| colon | HNF4A | path:04610_1  |
| colon | HNF4A | path:04610_5  |
| colon | HNF4A | path:04610_4  |
| colon | HNF4A | path:04610_3  |
| colon | HNF4A | path:04950_2  |
| colon | HNF4A | path:04950_3  |
| colon | TP53  | path:04010_11 |
| colon | TP53  | path:04012_1  |
| colon | TP53  | path:04012_5  |
| colon | TP53  | path:04110_2  |
| colon | TP53  | path:04110_9  |
| colon | TP53  | path:04110_11 |
| colon | TP53  | path:04110_13 |
| colon | TP53  | path:04110_1  |
| colon | TP53  | path:04110_7  |
| colon | TP53  | path:04110_5  |
| colon | TP53  | path:04110_10 |
| colon | TP53  | path:04110_6  |
| colon | TP53  | path:04115_2  |
| colon | TP53  | path:04210_9  |
| colon | TP53  | path:04210_8  |
| colon | TP53  | path:04360_3  |
| colon | TP53  | path:04510_19 |
| colon | TP53  | path:04510_6  |
| colon | TP53  | path:04510_4  |
| colon | TP53  | path:04510_13 |
| colon | TP53  | path:04510_12 |
| colon | TP53  | path:04650_3  |
| colon | TP53  | path:04722_15 |
| colon | TP53  | path:04912_7  |
| colon | TP53  | path:05014_2  |
| colon | TP53  | path:05160_9  |
| colon | TP53  | path:05160_10 |
| colon | TP53  | path:05200_6  |
| colon | TP53  | path:05200_7  |
| colon | TP53  | path:05200_10 |
| colon | TP53  | path:05200_15 |
| colon | TP53  | path:05200_24 |
| colon | TP53  | path:05200_25 |
| colon | TP53  | path:05200_38 |
| colon | TP53  | path:05200_1  |
| colon | TP53  | path:05200_2  |
| colon | TP53  | path:05200_9  |
| colon | TP53  | path:05200_14 |

|           |        |               |
|-----------|--------|---------------|
| colon     | TP53   | path:05200_16 |
| colon     | TP53   | path:05200_13 |
| colon     | TP53   | path:05200_20 |
| colon     | TP53   | path:05200_26 |
| colon     | TP53   | path:05200_3  |
| colon     | TP53   | path:05200_17 |
| colon     | TP53   | path:05200_37 |
| colon     | TP53   | path:05200_19 |
| colon     | TP53   | path:05200_8  |
| colon     | TP53   | path:05200_39 |
| colon     | TP53   | path:05200_18 |
| colon     | TP53   | path:05200_21 |
| colon     | TP53   | path:05213_3  |
| colon     | TP53   | path:05214_2  |
| colon     | TP53   | path:05214_1  |
| colon     | TP53   | path:05214_3  |
| colon     | TP53   | path:05215_6  |
| colon     | TP53   | path:05215_7  |
| colon     | TP53   | path:05215_4  |
| colon     | TP53   | path:05215_9  |
| colon     | TP53   | path:05215_10 |
| colon     | TP53   | path:05218_2  |
| colon     | TP53   | path:05218_1  |
| colon     | TP53   | path:05218_3  |
| colon     | TP53   | path:05218_5  |
| colon     | TP53   | path:05219_3  |
| colon     | TP53   | path:05219_5  |
| colon     | TP53   | path:05220_4  |
| colon     | TP53   | path:05223_2  |
| erythroid | GATA1  | path:04060_32 |
| erythroid | POU2F1 | path:00232_1  |
| erythroid | POU2F1 | path:00590_2  |
| erythroid | POU2F1 | path:00590_1  |
| erythroid | POU2F1 | path:00591_1  |
| erythroid | POU2F1 | path:00830_1  |
| erythroid | POU2F1 | path:00980_1  |
| erythroid | POU2F1 | path:00982_2  |
| erythroid | POU2F1 | path:04060_4  |
| erythroid | POU2F1 | path:04110_1  |
| erythroid | POU2F1 | path:04110_13 |
| erythroid | POU2F1 | path:04110_5  |
| erythroid | POU2F1 | path:04110_11 |
| erythroid | POU2F1 | path:04110_9  |
| erythroid | POU2F1 | path:04110_10 |

|           |        |               |
|-----------|--------|---------------|
| erythroid | POU2F1 | path:04350_1  |
| erythroid | POU2F1 | path:04620_4  |
| erythroid | POU2F1 | path:04664_1  |
| erythroid | POU2F1 | path:05200_38 |
| erythroid | POU2F1 | path:05200_35 |
| erythroid | POU2F1 | path:05200_25 |
| erythroid | POU2F1 | path:05200_37 |
| erythroid | POU2F1 | path:05200_39 |
| erythroid | POU2F1 | path:05200_26 |
| erythroid | POU2F1 | path:05200_24 |
| erythroid | POU2F1 | path:05200_20 |
| erythroid | POU2F1 | path:05200_18 |
| erythroid | POU2F1 | path:05200_21 |
| erythroid | POU2F1 | path:05200_33 |
| erythroid | POU2F1 | path:05200_15 |
| erythroid | POU2F1 | path:05216_3  |
| erythroid | POU2F1 | path:05219_5  |
| erythroid | POU2F1 | path:05219_3  |
| erythroid | POU2F1 | path:05222_1  |
| erythroid | POU2F1 | path:05222_5  |
| heart     | CREB1  | path:04514_19 |
| heart     | CREB1  | path:04612_3  |
| heart     | CREB1  | path:04620_8  |
| heart     | CREB1  | path:04620_5  |
| heart     | CREB1  | path:04620_9  |
| heart     | CREB1  | path:04620_4  |
| heart     | CREB1  | path:04620_6  |
| heart     | CREB1  | path:05142_3  |
| heart     | FLI1   | path:04512_1  |
| heart     | FLI1   | path:04512_3  |
| heart     | FOXO3  | path:04920_2  |
| heart     | NR1I3  | path:00830_1  |
| heart     | NR1I3  | path:00980_1  |
| heart     | NR1I3  | path:00982_2  |
| heart     | SREBF1 | path:04910_4  |
| heart     | SREBF1 | path:04910_1  |
| heart     | TP63   | path:04110_11 |
| heart     | TP63   | path:04110_10 |
| heart     | TP63   | path:04110_5  |
| heart     | TP63   | path:04110_7  |
| heart     | TP63   | path:04110_1  |
| heart     | TP63   | path:04110_9  |
| heart     | TP63   | path:04110_2  |
| heart     | TP63   | path:04115_2  |

|       |      |               |
|-------|------|---------------|
| heart | TP63 | path:05200_21 |
| heart | TP63 | path:05200_7  |
| heart | TP63 | path:05200_9  |
| heart | TP63 | path:05200_3  |
| heart | TP63 | path:05200_14 |
| heart | TP63 | path:05200_39 |
| heart | TP63 | path:05200_15 |
| heart | TP63 | path:05200_25 |
| heart | TP63 | path:05200_20 |
| heart | TP63 | path:05200_13 |
| heart | TP63 | path:05200_2  |
| heart | TP63 | path:05200_1  |
| heart | TP63 | path:05200_19 |
| heart | TP63 | path:05200_37 |
| heart | TP63 | path:05214_3  |
| heart | TP63 | path:05215_4  |
| heart | TP63 | path:05215_6  |
| heart | TP63 | path:05215_9  |
| heart | TP63 | path:05215_10 |
| heart | TP63 | path:05218_3  |
| heart | TP63 | path:05218_5  |
| heart | TP63 | path:05219_3  |
| heart | TP63 | path:05219_5  |
| heart | TP63 | path:05220_4  |
| HeLa  | ELK1 | path:04010_11 |
| HeLa  | ELK1 | path:04010_4  |
| HeLa  | ELK1 | path:05020_3  |
| HeLa  | ELK1 | path:05020_4  |
| HeLa  | ELK1 | path:05110_3  |
| HeLa  | ELK1 | path:05200_18 |
| HeLa  | ELK1 | path:05200_26 |
| HeLa  | NFIC | path:00140_1  |
| HeLa  | NFIC | path:00591_1  |
| HeLa  | NFIC | path:04010_22 |
| HeLa  | NFIC | path:04080_5  |
| HeLa  | NFIC | path:04115_2  |
| HeLa  | NFIC | path:04510_6  |
| HeLa  | NFIC | path:04512_2  |
| HeLa  | NFIC | path:04660_10 |
| HeLa  | NFIC | path:04660_9  |
| HeLa  | NFIC | path:04662_5  |
| HeLa  | NFIC | path:04662_9  |
| HeLa  | NFIC | path:04722_15 |
| HeLa  | NFIC | path:05200_18 |

|      |       |               |
|------|-------|---------------|
| HeLa | NFIC  | path:05200_2  |
| HeLa | NFIC  | path:05200_7  |
| HeLa | NFIC  | path:05200_13 |
| HeLa | NFIC  | path:05200_6  |
| HeLa | NFIC  | path:05200_26 |
| HeLa | NFIC  | path:05200_25 |
| HeLa | NFIC  | path:05200_37 |
| HeLa | NFIC  | path:05200_39 |
| HeLa | NFIC  | path:05200_24 |
| HeLa | NFIC  | path:05200_15 |
| HeLa | NFIC  | path:05200_21 |
| HeLa | NFIC  | path:05214_3  |
| HeLa | NFIC  | path:05218_1  |
| HeLa | NFIC  | path:05218_2  |
| HeLa | NFIC  | path:05218_3  |
| HeLa | NFIC  | path:05219_3  |
| HeLa | NFIC  | path:05220_4  |
| HeLa | NFYA  | path:04110_11 |
| HeLa | NFYA  | path:04110_6  |
| HeLa | NFYA  | path:04110_10 |
| HeLa | NFYA  | path:04110_5  |
| HeLa | NFYA  | path:04110_9  |
| HeLa | NFYA  | path:04110_7  |
| HeLa | NFYA  | path:04110_2  |
| HeLa | NFYA  | path:04110_1  |
| HeLa | NFYA  | path:04110_4  |
| HeLa | NFYA  | path:04115_2  |
| HeLa | NR2F1 | path:03320_1  |
| HeLa | REL   | path:04612_5  |
| HeLa | REL   | path:04620_1  |
| HeLa | REL   | path:04620_4  |
| HeLa | REL   | path:04620_3  |
| HeLa | REL   | path:04650_14 |
| HeLa | REL   | path:04650_15 |
| HeLa | REL   | path:04650_13 |
| HeLa | REL   | path:04650_5  |
| HeLa | SP1   | path:00140_1  |
| HeLa | SP1   | path:00330_1  |
| HeLa | SP1   | path:00330_4  |
| HeLa | SP1   | path:00330_5  |
| HeLa | SP1   | path:00330_3  |
| HeLa | SP1   | path:00350_2  |
| HeLa | SP1   | path:00590_2  |
| HeLa | SP1   | path:00980_1  |



|      |     |               |
|------|-----|---------------|
| HeLa | SP1 | path:04010_7  |
| HeLa | SP1 | path:04010_6  |
| HeLa | SP1 | path:04010_8  |
| HeLa | SP1 | path:04060_19 |
| HeLa | SP1 | path:04060_32 |
| HeLa | SP1 | path:04060_10 |
| HeLa | SP1 | path:04060_20 |
| HeLa | SP1 | path:04060_46 |
| HeLa | SP1 | path:04110_7  |
| HeLa | SP1 | path:04110_13 |
| HeLa | SP1 | path:04110_11 |
| HeLa | SP1 | path:04110_4  |
| HeLa | SP1 | path:04110_5  |
| HeLa | SP1 | path:04110_10 |
| HeLa | SP1 | path:04110_9  |
| HeLa | SP1 | path:04110_1  |
| HeLa | SP1 | path:04110_2  |
| HeLa | SP1 | path:04115_2  |
| HeLa | SP1 | path:04144_2  |
| HeLa | SP1 | path:04210_5  |
| HeLa | SP1 | path:04210_4  |
| HeLa | SP1 | path:04210_9  |
| HeLa | SP1 | path:04210_6  |
| HeLa | SP1 | path:04310_5  |
| HeLa | SP1 | path:04310_7  |
| HeLa | SP1 | path:04350_5  |
| HeLa | SP1 | path:04350_4  |
| HeLa | SP1 | path:04350_1  |
| HeLa | SP1 | path:04510_4  |
| HeLa | SP1 | path:04510_3  |
| HeLa | SP1 | path:04510_5  |
| HeLa | SP1 | path:04510_10 |
| HeLa | SP1 | path:04510_14 |
| HeLa | SP1 | path:04510_19 |
| HeLa | SP1 | path:04510_16 |
| HeLa | SP1 | path:04510_6  |
| HeLa | SP1 | path:04510_7  |
| HeLa | SP1 | path:04510_1  |
| HeLa | SP1 | path:04510_13 |
| HeLa | SP1 | path:04510_12 |
| HeLa | SP1 | path:04510_17 |
| HeLa | SP1 | path:04512_2  |
| HeLa | SP1 | path:04512_3  |
| HeLa | SP1 | path:04512_1  |

|      |     |               |
|------|-----|---------------|
| HeLa | SP1 | path:04520_2  |
| HeLa | SP1 | path:04520_5  |
| HeLa | SP1 | path:04540_7  |
| HeLa | SP1 | path:04610_2  |
| HeLa | SP1 | path:04610_6  |
| HeLa | SP1 | path:04610_1  |
| HeLa | SP1 | path:04610_5  |
| HeLa | SP1 | path:04610_7  |
| HeLa | SP1 | path:04610_4  |
| HeLa | SP1 | path:04610_3  |
| HeLa | SP1 | path:04620_5  |
| HeLa | SP1 | path:04620_6  |
| HeLa | SP1 | path:04620_9  |
| HeLa | SP1 | path:04620_8  |
| HeLa | SP1 | path:04630_2  |
| HeLa | SP1 | path:04630_1  |
| HeLa | SP1 | path:04650_3  |
| HeLa | SP1 | path:04660_9  |
| HeLa | SP1 | path:04662_9  |
| HeLa | SP1 | path:04722_15 |
| HeLa | SP1 | path:04810_16 |
| HeLa | SP1 | path:04912_7  |
| HeLa | SP1 | path:04940_2  |
| HeLa | SP1 | path:05014_1  |
| HeLa | SP1 | path:05014_2  |
| HeLa | SP1 | path:05020_2  |
| HeLa | SP1 | path:05020_1  |
| HeLa | SP1 | path:05100_6  |
| HeLa | SP1 | path:05140_4  |
| HeLa | SP1 | path:05140_6  |
| HeLa | SP1 | path:05142_11 |
| HeLa | SP1 | path:05142_12 |
| HeLa | SP1 | path:05142_3  |
| HeLa | SP1 | path:05145_8  |
| HeLa | SP1 | path:05145_6  |
| HeLa | SP1 | path:05146_1  |
| HeLa | SP1 | path:05200_31 |
| HeLa | SP1 | path:05200_7  |
| HeLa | SP1 | path:05200_2  |
| HeLa | SP1 | path:05200_21 |
| HeLa | SP1 | path:05200_42 |
| HeLa | SP1 | path:05200_19 |
| HeLa | SP1 | path:05200_39 |
| HeLa | SP1 | path:05200_1  |

|      |     |               |
|------|-----|---------------|
| HeLa | SP1 | path:05200_38 |
| HeLa | SP1 | path:05200_16 |
| HeLa | SP1 | path:05200_35 |
| HeLa | SP1 | path:05200_8  |
| HeLa | SP1 | path:05200_9  |
| HeLa | SP1 | path:05200_33 |
| HeLa | SP1 | path:05200_17 |
| HeLa | SP1 | path:05200_37 |
| HeLa | SP1 | path:05200_13 |
| HeLa | SP1 | path:05200_6  |
| HeLa | SP1 | path:05200_24 |
| HeLa | SP1 | path:05200_25 |
| HeLa | SP1 | path:05200_18 |
| HeLa | SP1 | path:05200_41 |
| HeLa | SP1 | path:05200_29 |
| HeLa | SP1 | path:05200_34 |
| HeLa | SP1 | path:05200_20 |
| HeLa | SP1 | path:05200_10 |
| HeLa | SP1 | path:05200_30 |
| HeLa | SP1 | path:05200_32 |
| HeLa | SP1 | path:05200_15 |
| HeLa | SP1 | path:05200_14 |
| HeLa | SP1 | path:05200_26 |
| HeLa | SP1 | path:05210_8  |
| HeLa | SP1 | path:05210_5  |
| HeLa | SP1 | path:05212_3  |
| HeLa | SP1 | path:05212_8  |
| HeLa | SP1 | path:05212_10 |
| HeLa | SP1 | path:05212_9  |
| HeLa | SP1 | path:05214_3  |
| HeLa | SP1 | path:05214_1  |
| HeLa | SP1 | path:05214_2  |
| HeLa | SP1 | path:05215_10 |
| HeLa | SP1 | path:05215_4  |
| HeLa | SP1 | path:05215_9  |
| HeLa | SP1 | path:05215_5  |
| HeLa | SP1 | path:05215_7  |
| HeLa | SP1 | path:05215_6  |
| HeLa | SP1 | path:05216_3  |
| HeLa | SP1 | path:05218_1  |
| HeLa | SP1 | path:05218_3  |
| HeLa | SP1 | path:05218_2  |
| HeLa | SP1 | path:05218_4  |
| HeLa | SP1 | path:05218_5  |

|      |        |               |
|------|--------|---------------|
| HeLa | SP1    | path:05219_3  |
| HeLa | SP1    | path:05219_5  |
| HeLa | SP1    | path:05220_8  |
| HeLa | SP1    | path:05220_4  |
| HeLa | SP1    | path:05220_5  |
| HeLa | SP1    | path:05221_2  |
| HeLa | SP1    | path:05222_5  |
| HeLa | SP1    | path:05222_2  |
| HeLa | SP1    | path:05222_1  |
| HeLa | SP1    | path:05223_3  |
| HeLa | SP1    | path:05223_1  |
| HeLa | SP1    | path:05320_2  |
| HeLa | SP1    | path:05330_2  |
| HeLa | SP1    | path:05332_1  |
| HeLa | SP1    | path:05414_2  |
| HeLa | SRF    | path:05020_3  |
| HeLa | SRF    | path:05020_4  |
| HeLa | SRF    | path:05410_1  |
| HeLa | SRF    | path:05416_1  |
| HeLa | TFAP2A | path:04010_7  |
| HeLa | TFAP2A | path:04012_5  |
| HeLa | TFAP2A | path:04020_1  |
| HeLa | TFAP2A | path:04080_5  |
| HeLa | TFAP2A | path:04144_2  |
| HeLa | TFAP2A | path:04510_5  |
| HeLa | TFAP2A | path:04510_4  |
| HeLa | TFAP2A | path:04510_19 |
| HeLa | TFAP2A | path:04510_13 |
| HeLa | TFAP2A | path:04510_12 |
| HeLa | TFAP2A | path:04510_7  |
| HeLa | TFAP2A | path:04510_6  |
| HeLa | TFAP2A | path:04520_3  |
| HeLa | TFAP2A | path:04520_5  |
| HeLa | TFAP2A | path:04520_7  |
| HeLa | TFAP2A | path:04520_2  |
| HeLa | TFAP2A | path:04912_7  |
| HeLa | TFAP2A | path:05200_26 |
| HeLa | TFAP2A | path:05200_24 |
| HeLa | TFAP2A | path:05200_29 |
| HeLa | TFAP2A | path:05200_37 |
| HeLa | TFAP2A | path:05200_19 |
| HeLa | TFAP2A | path:05200_6  |
| HeLa | TFAP2A | path:05200_7  |
| HeLa | TFAP2A | path:05200_38 |

|               |        |               |
|---------------|--------|---------------|
| HeLa          | TFAP2A | path:05200_35 |
| HeLa          | TFAP2A | path:05200_39 |
| HeLa          | TFAP2A | path:05200_25 |
| HeLa          | TFAP2A | path:05200_17 |
| HeLa          | TFAP2A | path:05200_8  |
| HeLa          | TFAP2A | path:05200_9  |
| HeLa          | TFAP2A | path:05200_30 |
| HeLa          | TFAP2A | path:05200_2  |
| HeLa          | TFAP2A | path:05200_10 |
| HeLa          | TFAP2A | path:05200_16 |
| HeLa          | TFAP2A | path:05212_3  |
| HeLa          | TFAP2A | path:05212_8  |
| HeLa          | TFAP2A | path:05214_2  |
| HeLa          | TFAP2A | path:05214_1  |
| HeLa          | TFAP2A | path:05215_9  |
| HeLa          | TFAP2A | path:05215_8  |
| HeLa          | TFAP2A | path:05215_7  |
| HeLa          | TFAP2A | path:05215_10 |
| HeLa          | TFAP2A | path:05219_2  |
| HeLa          | TFAP2A | path:05223_1  |
| HeLa          | VDR    | path:05200_19 |
| HeLa          | VDR    | path:05200_10 |
| HeLa          | VDR    | path:05200_7  |
| HeLa          | VDR    | path:05200_16 |
| hematopoietic | FOXA3  | path:00140_1  |
| hematopoietic | FOXA3  | path:00591_1  |
| hematopoietic | FOXA3  | path:00830_1  |
| hematopoietic | FOXA3  | path:00980_1  |
| hematopoietic | FOXA3  | path:00982_2  |
| hematopoietic | STAT6  | path:00590_2  |
| hematopoietic | STAT6  | path:00590_1  |
| hematopoietic | STAT6  | path:04630_2  |
| Hep3B         | EGR1   | path:04144_2  |
| Hep3B         | EGR1   | path:04350_1  |
| Hep3B         | EGR1   | path:04350_5  |
| Hep3B         | EGR1   | path:04510_6  |
| Hep3B         | EGR1   | path:04510_5  |
| Hep3B         | EGR1   | path:04510_7  |
| Hep3B         | EGR1   | path:04510_12 |
| Hep3B         | EGR1   | path:04510_13 |
| Hep3B         | EGR1   | path:04512_1  |
| Hep3B         | EGR1   | path:04512_2  |
| Hep3B         | EGR1   | path:04512_3  |
| Hep3B         | EGR1   | path:05020_2  |

|         |        |               |
|---------|--------|---------------|
| Hep3B   | EGR1   | path:05200_24 |
| Hep3B   | EGR1   | path:05200_37 |
| Hep3B   | EGR1   | path:05200_35 |
| Hep3B   | EGR1   | path:05200_29 |
| Hep3B   | EGR1   | path:05200_16 |
| Hep3B   | EGR1   | path:05200_31 |
| Hep3B   | EGR1   | path:05200_30 |
| Hep3B   | EGR1   | path:05200_25 |
| Hep3B   | EGR1   | path:05212_3  |
| Hep3B   | EGR1   | path:05212_8  |
| Hep3B   | EGR1   | path:05215_7  |
| Hep3B   | EGR1   | path:05215_9  |
| Hep3B   | EGR1   | path:05218_4  |
| Hep3B   | GATA2  | path:04060_32 |
| Hep3B   | HNF4A  | path:00010_1  |
| Hep3B   | HNF4A  | path:00120_1  |
| Hep3B   | HNF4A  | path:00140_1  |
| Hep3B   | HNF4A  | path:00561_2  |
| Hep3B   | HNF4A  | path:00590_1  |
| Hep3B   | HNF4A  | path:00590_2  |
| Hep3B   | HNF4A  | path:00591_1  |
| Hep3B   | HNF4A  | path:00830_1  |
| Hep3B   | HNF4A  | path:00980_1  |
| Hep3B   | HNF4A  | path:00982_2  |
| Hep3B   | HNF4A  | path:03320_1  |
| Hep3B   | HNF4A  | path:04610_7  |
| Hep3B   | HNF4A  | path:04610_5  |
| Hep3B   | HNF4A  | path:04610_2  |
| Hep3B   | HNF4A  | path:04610_1  |
| Hep3B   | HNF4A  | path:04610_6  |
| Hep3B   | HNF4A  | path:04610_4  |
| Hep3B   | HNF4A  | path:04610_3  |
| Hep3B   | HNF4A  | path:04950_2  |
| Hep3B   | HNF4A  | path:04950_3  |
| hepatic | CEBPA  | path:04060_37 |
| hepatic | CEBPA  | path:04610_1  |
| hepatic | CEBPA  | path:04610_4  |
| hepatic | CEBPA  | path:04610_5  |
| hepatic | CEBPA  | path:04610_2  |
| hepatic | CEBPA  | path:04610_3  |
| HepG2   | GATA2  | path:04060_32 |
| HepG2   | GATA3  | path:04612_4  |
| HepG2   | NFE2L2 | path:00480_1  |
| HEPG2   | STAT5B | path:04630_1  |

|       |        |               |
|-------|--------|---------------|
| HEPG2 | STAT5B | path:04630_2  |
| HEPG2 | STAT5B | path:05200_33 |
| HEPG2 | STAT5B | path:05200_25 |
| HEPG2 | STAT5B | path:05200_26 |
| HEPG2 | STAT5B | path:05200_39 |
| HEPG2 | STAT5B | path:05200_35 |
| HEPG2 | STAT5B | path:05200_24 |
| HEPG2 | STAT5B | path:05200_37 |
| HEPG2 | STAT5B | path:05200_38 |
| HEPG2 | STAT5B | path:05200_21 |
| HEPG2 | STAT5B | path:05214_3  |
| HEPG2 | STAT5B | path:05218_1  |
| HEPG2 | STAT5B | path:05218_2  |
| HEPG2 | STAT5B | path:05218_5  |
| HEPG2 | STAT5B | path:05218_3  |
| HEPG2 | STAT5B | path:05219_5  |
| HEPG2 | STAT5B | path:05219_3  |
| HEPG2 | STAT5B | path:05220_4  |
| HL60  | KLF4   | path:04110_1  |
| HL60  | KLF4   | path:04110_5  |
| HL60  | KLF4   | path:04110_11 |
| HL60  | KLF4   | path:04110_10 |
| HL60  | KLF4   | path:04110_13 |
| HL60  | KLF4   | path:04110_9  |
| HL60  | KLF4   | path:04115_2  |
| HL60  | KLF4   | path:05145_11 |
| HL60  | KLF4   | path:05200_15 |
| HL60  | KLF4   | path:05200_25 |
| HL60  | KLF4   | path:05200_37 |
| HL60  | KLF4   | path:05200_13 |
| HL60  | KLF4   | path:05200_33 |
| HL60  | KLF4   | path:05200_21 |
| HL60  | KLF4   | path:05200_39 |
| HL60  | KLF4   | path:05200_9  |
| HL60  | KLF4   | path:05200_14 |
| HL60  | KLF4   | path:05200_35 |
| HL60  | KLF4   | path:05200_38 |
| HL60  | KLF4   | path:05200_2  |
| HL60  | KLF4   | path:05210_8  |
| HL60  | KLF4   | path:05210_5  |
| HL60  | KLF4   | path:05214_3  |
| HL60  | KLF4   | path:05219_5  |
| HL60  | KLF4   | path:05219_3  |
| HL60  | KLF4   | path:05220_4  |

|       |      |               |
|-------|------|---------------|
| HL60  | TP73 | path:04115_2  |
| HL60  | TP73 | path:04722_15 |
| HL60  | TP73 | path:05200_33 |
| HL60  | VDR  | path:05200_19 |
| HL60  | VDR  | path:05200_16 |
| HL60  | VDR  | path:05200_10 |
| HL60  | VDR  | path:05200_7  |
| HUVEC | EGR1 | path:04144_2  |
| HUVEC | EGR1 | path:04350_1  |
| HUVEC | EGR1 | path:04350_5  |
| HUVEC | EGR1 | path:04510_6  |
| HUVEC | EGR1 | path:04510_12 |
| HUVEC | EGR1 | path:04510_5  |
| HUVEC | EGR1 | path:04510_7  |
| HUVEC | EGR1 | path:04510_13 |
| HUVEC | EGR1 | path:04512_1  |
| HUVEC | EGR1 | path:04512_3  |
| HUVEC | EGR1 | path:04512_2  |
| HUVEC | EGR1 | path:05020_2  |
| HUVEC | EGR1 | path:05200_24 |
| HUVEC | EGR1 | path:05200_29 |
| HUVEC | EGR1 | path:05200_37 |
| HUVEC | EGR1 | path:05200_35 |
| HUVEC | EGR1 | path:05200_16 |
| HUVEC | EGR1 | path:05200_31 |
| HUVEC | EGR1 | path:05200_30 |
| HUVEC | EGR1 | path:05200_25 |
| HUVEC | EGR1 | path:05212_3  |
| HUVEC | EGR1 | path:05212_8  |
| HUVEC | EGR1 | path:05215_7  |
| HUVEC | EGR1 | path:05215_9  |
| HUVEC | EGR1 | path:05218_4  |
| HUVEC | REL  | path:04612_5  |
| HUVEC | REL  | path:04620_1  |
| HUVEC | REL  | path:04620_4  |
| HUVEC | REL  | path:04620_3  |
| HUVEC | REL  | path:04650_15 |
| HUVEC | REL  | path:04650_14 |
| HUVEC | REL  | path:04650_13 |
| HUVEC | REL  | path:04650_5  |
| HUVEC | RELA | path:04060_44 |
| HUVEC | RELA | path:04060_35 |
| HUVEC | RELA | path:04062_1  |
| HUVEC | RELA | path:04062_2  |



|       |      |               |
|-------|------|---------------|
| HUVEC | RELA | path:04110_10 |
| HUVEC | RELA | path:04110_9  |
| HUVEC | RELA | path:04110_1  |
| HUVEC | RELA | path:04110_2  |
| HUVEC | RELA | path:04110_7  |
| HUVEC | RELA | path:04110_5  |
| HUVEC | RELA | path:04110_11 |
| HUVEC | RELA | path:04115_2  |
| HUVEC | RELA | path:04612_5  |
| HUVEC | RELA | path:04620_8  |
| HUVEC | RELA | path:04620_9  |
| HUVEC | RELA | path:04620_5  |
| HUVEC | RELA | path:04620_1  |
| HUVEC | RELA | path:04620_6  |
| HUVEC | RELA | path:04620_4  |
| HUVEC | RELA | path:04620_3  |
| HUVEC | RELA | path:04620_7  |
| HUVEC | RELA | path:04650_13 |
| HUVEC | RELA | path:04650_5  |
| HUVEC | RELA | path:04650_14 |
| HUVEC | RELA | path:04650_15 |
| HUVEC | RELA | path:04650_3  |
| HUVEC | RELA | path:04670_6  |
| HUVEC | RELA | path:04670_9  |
| HUVEC | RELA | path:04670_8  |
| HUVEC | RELA | path:04670_2  |
| HUVEC | RELA | path:04670_4  |
| HUVEC | RELA | path:05142_3  |
| HUVEC | RELA | path:05200_15 |
| HUVEC | RELA | path:05200_35 |
| HUVEC | RELA | path:05200_21 |
| HUVEC | RELA | path:05200_37 |
| HUVEC | RELA | path:05200_13 |
| HUVEC | RELA | path:05200_25 |
| HUVEC | RELA | path:05200_39 |
| HUVEC | RELA | path:05200_38 |
| HUVEC | RELA | path:05200_2  |
| HUVEC | RELA | path:05219_3  |
| HUVEC | SP1  | path:00140_1  |
| HUVEC | SP1  | path:00330_4  |
| HUVEC | SP1  | path:00330_1  |
| HUVEC | SP1  | path:00330_3  |
| HUVEC | SP1  | path:00330_5  |
| HUVEC | SP1  | path:00350_2  |

|       |     |               |
|-------|-----|---------------|
| HUVEC | SP1 | path:00590_2  |
| HUVEC | SP1 | path:00980_1  |
| HUVEC | SP1 | path:04010_6  |
| HUVEC | SP1 | path:04010_8  |
| HUVEC | SP1 | path:04010_7  |
| HUVEC | SP1 | path:04060_19 |
| HUVEC | SP1 | path:04060_32 |
| HUVEC | SP1 | path:04060_10 |
| HUVEC | SP1 | path:04060_20 |
| HUVEC | SP1 | path:04060_46 |
| HUVEC | SP1 | path:04110_7  |
| HUVEC | SP1 | path:04110_9  |
| HUVEC | SP1 | path:04110_4  |
| HUVEC | SP1 | path:04110_11 |
| HUVEC | SP1 | path:04110_10 |
| HUVEC | SP1 | path:04110_13 |
| HUVEC | SP1 | path:04110_5  |
| HUVEC | SP1 | path:04110_2  |
| HUVEC | SP1 | path:04110_1  |
| HUVEC | SP1 | path:04115_2  |
| HUVEC | SP1 | path:04144_2  |
| HUVEC | SP1 | path:04210_5  |
| HUVEC | SP1 | path:04210_4  |
| HUVEC | SP1 | path:04210_9  |
| HUVEC | SP1 | path:04210_6  |
| HUVEC | SP1 | path:04310_7  |
| HUVEC | SP1 | path:04310_5  |
| HUVEC | SP1 | path:04350_4  |
| HUVEC | SP1 | path:04350_5  |
| HUVEC | SP1 | path:04350_1  |
| HUVEC | SP1 | path:04510_6  |
| HUVEC | SP1 | path:04510_4  |
| HUVEC | SP1 | path:04510_7  |
| HUVEC | SP1 | path:04510_14 |
| HUVEC | SP1 | path:04510_17 |
| HUVEC | SP1 | path:04510_5  |
| HUVEC | SP1 | path:04510_13 |
| HUVEC | SP1 | path:04510_19 |
| HUVEC | SP1 | path:04510_10 |
| HUVEC | SP1 | path:04510_16 |
| HUVEC | SP1 | path:04510_3  |
| HUVEC | SP1 | path:04510_1  |
| HUVEC | SP1 | path:04510_12 |
| HUVEC | SP1 | path:04512_2  |

|       |     |               |
|-------|-----|---------------|
| HUVEC | SP1 | path:04512_1  |
| HUVEC | SP1 | path:04512_3  |
| HUVEC | SP1 | path:04520_5  |
| HUVEC | SP1 | path:04520_2  |
| HUVEC | SP1 | path:04540_7  |
| HUVEC | SP1 | path:04610_5  |
| HUVEC | SP1 | path:04610_7  |
| HUVEC | SP1 | path:04610_4  |
| HUVEC | SP1 | path:04610_2  |
| HUVEC | SP1 | path:04610_1  |
| HUVEC | SP1 | path:04610_6  |
| HUVEC | SP1 | path:04610_3  |
| HUVEC | SP1 | path:04620_8  |
| HUVEC | SP1 | path:04620_6  |
| HUVEC | SP1 | path:04620_5  |
| HUVEC | SP1 | path:04620_9  |
| HUVEC | SP1 | path:04630_2  |
| HUVEC | SP1 | path:04630_1  |
| HUVEC | SP1 | path:04650_3  |
| HUVEC | SP1 | path:04660_9  |
| HUVEC | SP1 | path:04662_9  |
| HUVEC | SP1 | path:04722_15 |
| HUVEC | SP1 | path:04810_16 |
| HUVEC | SP1 | path:04912_7  |
| HUVEC | SP1 | path:04940_2  |
| HUVEC | SP1 | path:05014_2  |
| HUVEC | SP1 | path:05014_1  |
| HUVEC | SP1 | path:05020_1  |
| HUVEC | SP1 | path:05020_2  |
| HUVEC | SP1 | path:05100_6  |
| HUVEC | SP1 | path:05140_4  |
| HUVEC | SP1 | path:05140_6  |
| HUVEC | SP1 | path:05142_11 |
| HUVEC | SP1 | path:05142_3  |
| HUVEC | SP1 | path:05142_12 |
| HUVEC | SP1 | path:05145_6  |
| HUVEC | SP1 | path:05145_8  |
| HUVEC | SP1 | path:05146_1  |
| HUVEC | SP1 | path:05200_31 |
| HUVEC | SP1 | path:05200_2  |
| HUVEC | SP1 | path:05200_21 |
| HUVEC | SP1 | path:05200_39 |
| HUVEC | SP1 | path:05200_7  |
| HUVEC | SP1 | path:05200_19 |

|       |     |               |
|-------|-----|---------------|
| HUVEC | SP1 | path:05200_42 |
| HUVEC | SP1 | path:05200_34 |
| HUVEC | SP1 | path:05200_38 |
| HUVEC | SP1 | path:05200_25 |
| HUVEC | SP1 | path:05200_16 |
| HUVEC | SP1 | path:05200_41 |
| HUVEC | SP1 | path:05200_35 |
| HUVEC | SP1 | path:05200_32 |
| HUVEC | SP1 | path:05200_8  |
| HUVEC | SP1 | path:05200_9  |
| HUVEC | SP1 | path:05200_15 |
| HUVEC | SP1 | path:05200_33 |
| HUVEC | SP1 | path:05200_13 |
| HUVEC | SP1 | path:05200_37 |
| HUVEC | SP1 | path:05200_6  |
| HUVEC | SP1 | path:05200_24 |
| HUVEC | SP1 | path:05200_1  |
| HUVEC | SP1 | path:05200_30 |
| HUVEC | SP1 | path:05200_29 |
| HUVEC | SP1 | path:05200_18 |
| HUVEC | SP1 | path:05200_10 |
| HUVEC | SP1 | path:05200_17 |
| HUVEC | SP1 | path:05200_20 |
| HUVEC | SP1 | path:05200_14 |
| HUVEC | SP1 | path:05200_26 |
| HUVEC | SP1 | path:05210_8  |
| HUVEC | SP1 | path:05210_5  |
| HUVEC | SP1 | path:05212_3  |
| HUVEC | SP1 | path:05212_8  |
| HUVEC | SP1 | path:05212_10 |
| HUVEC | SP1 | path:05212_9  |
| HUVEC | SP1 | path:05214_1  |
| HUVEC | SP1 | path:05214_3  |
| HUVEC | SP1 | path:05214_2  |
| HUVEC | SP1 | path:05215_10 |
| HUVEC | SP1 | path:05215_9  |
| HUVEC | SP1 | path:05215_4  |
| HUVEC | SP1 | path:05215_5  |
| HUVEC | SP1 | path:05215_7  |
| HUVEC | SP1 | path:05215_6  |
| HUVEC | SP1 | path:05216_3  |
| HUVEC | SP1 | path:05218_4  |
| HUVEC | SP1 | path:05218_3  |
| HUVEC | SP1 | path:05218_1  |

|           |       |               |
|-----------|-------|---------------|
| HUVEC     | SP1   | path:05218_2  |
| HUVEC     | SP1   | path:05218_5  |
| HUVEC     | SP1   | path:05219_5  |
| HUVEC     | SP1   | path:05219_3  |
| HUVEC     | SP1   | path:05220_8  |
| HUVEC     | SP1   | path:05220_4  |
| HUVEC     | SP1   | path:05220_5  |
| HUVEC     | SP1   | path:05221_2  |
| HUVEC     | SP1   | path:05222_5  |
| HUVEC     | SP1   | path:05222_2  |
| HUVEC     | SP1   | path:05222_1  |
| HUVEC     | SP1   | path:05223_1  |
| HUVEC     | SP1   | path:05223_3  |
| HUVEC     | SP1   | path:05320_2  |
| HUVEC     | SP1   | path:05330_2  |
| HUVEC     | SP1   | path:05332_1  |
| HUVEC     | SP1   | path:05414_2  |
| IARC-EW17 | ELK1  | path:04010_4  |
| IARC-EW17 | ELK1  | path:04010_11 |
| IARC-EW17 | ELK1  | path:05020_4  |
| IARC-EW17 | ELK1  | path:05020_3  |
| IARC-EW17 | ELK1  | path:05110_3  |
| IARC-EW17 | ELK1  | path:05200_26 |
| IARC-EW17 | ELK1  | path:05200_18 |
| IARC-EW17 | FLI1  | path:04512_1  |
| IARC-EW17 | FLI1  | path:04512_3  |
| intestine | AKNA  | path:04060_18 |
| intestine | AKNA  | path:04514_8  |
| intestine | AKNA  | path:04672_2  |
| intestine | AKNA  | path:05144_4  |
| intestine | AKNA  | path:05145_14 |
| intestine | AKNA  | path:05310_1  |
| intestine | AKNA  | path:05320_1  |
| intestine | AKNA  | path:05322_3  |
| intestine | AKNA  | path:05330_1  |
| intestine | AKNA  | path:05416_3  |
| intestine | HNF1A | path:00140_1  |
| intestine | HNF1A | path:00980_1  |
| intestine | HNF1A | path:00982_2  |
| intestine | HNF1A | path:04610_3  |
| intestine | HNF1A | path:04610_2  |
| intestine | HNF1A | path:04610_6  |
| intestine | HNF1A | path:04610_4  |
| intestine | HNF1A | path:04950_3  |

|           |       |               |
|-----------|-------|---------------|
| intestine | HNF4A | path:00010_1  |
| intestine | HNF4A | path:00120_1  |
| intestine | HNF4A | path:00140_1  |
| intestine | HNF4A | path:00561_2  |
| intestine | HNF4A | path:00590_2  |
| intestine | HNF4A | path:00590_1  |
| intestine | HNF4A | path:00591_1  |
| intestine | HNF4A | path:00830_1  |
| intestine | HNF4A | path:00980_1  |
| intestine | HNF4A | path:00982_2  |
| intestine | HNF4A | path:03320_1  |
| intestine | HNF4A | path:04610_7  |
| intestine | HNF4A | path:04610_1  |
| intestine | HNF4A | path:04610_6  |
| intestine | HNF4A | path:04610_3  |
| intestine | HNF4A | path:04610_5  |
| intestine | HNF4A | path:04610_2  |
| intestine | HNF4A | path:04610_4  |
| intestine | HNF4A | path:04950_3  |
| intestine | HNF4A | path:04950_2  |
| intestine | TP53  | path:04010_11 |
| intestine | TP53  | path:04012_1  |
| intestine | TP53  | path:04012_5  |
| intestine | TP53  | path:04110_9  |
| intestine | TP53  | path:04110_2  |
| intestine | TP53  | path:04110_11 |
| intestine | TP53  | path:04110_6  |
| intestine | TP53  | path:04110_13 |
| intestine | TP53  | path:04110_1  |
| intestine | TP53  | path:04110_10 |
| intestine | TP53  | path:04110_5  |
| intestine | TP53  | path:04110_7  |
| intestine | TP53  | path:04115_2  |
| intestine | TP53  | path:04210_8  |
| intestine | TP53  | path:04210_9  |
| intestine | TP53  | path:04360_3  |
| intestine | TP53  | path:04510_4  |
| intestine | TP53  | path:04510_19 |
| intestine | TP53  | path:04510_6  |
| intestine | TP53  | path:04510_12 |
| intestine | TP53  | path:04510_13 |
| intestine | TP53  | path:04650_3  |
| intestine | TP53  | path:04722_15 |
| intestine | TP53  | path:04912_7  |

|           |       |               |
|-----------|-------|---------------|
| intestine | TP53  | path:05014_2  |
| intestine | TP53  | path:05160_10 |
| intestine | TP53  | path:05160_9  |
| intestine | TP53  | path:05200_6  |
| intestine | TP53  | path:05200_15 |
| intestine | TP53  | path:05200_25 |
| intestine | TP53  | path:05200_38 |
| intestine | TP53  | path:05200_14 |
| intestine | TP53  | path:05200_16 |
| intestine | TP53  | path:05200_9  |
| intestine | TP53  | path:05200_24 |
| intestine | TP53  | path:05200_13 |
| intestine | TP53  | path:05200_26 |
| intestine | TP53  | path:05200_10 |
| intestine | TP53  | path:05200_37 |
| intestine | TP53  | path:05200_3  |
| intestine | TP53  | path:05200_2  |
| intestine | TP53  | path:05200_8  |
| intestine | TP53  | path:05200_7  |
| intestine | TP53  | path:05200_20 |
| intestine | TP53  | path:05200_1  |
| intestine | TP53  | path:05200_18 |
| intestine | TP53  | path:05200_17 |
| intestine | TP53  | path:05200_39 |
| intestine | TP53  | path:05200_19 |
| intestine | TP53  | path:05200_21 |
| intestine | TP53  | path:05213_3  |
| intestine | TP53  | path:05214_1  |
| intestine | TP53  | path:05214_2  |
| intestine | TP53  | path:05214_3  |
| intestine | TP53  | path:05215_6  |
| intestine | TP53  | path:05215_10 |
| intestine | TP53  | path:05215_7  |
| intestine | TP53  | path:05215_9  |
| intestine | TP53  | path:05215_4  |
| intestine | TP53  | path:05218_1  |
| intestine | TP53  | path:05218_5  |
| intestine | TP53  | path:05218_2  |
| intestine | TP53  | path:05218_3  |
| intestine | TP53  | path:05219_5  |
| intestine | TP53  | path:05219_3  |
| intestine | TP53  | path:05220_4  |
| intestine | TP53  | path:05223_2  |
| JEG3      | GATA2 | path:04060_32 |

|        |       |               |
|--------|-------|---------------|
| JEG3   | GATA3 | path:04612_4  |
| Jurkat | ELK1  | path:04010_4  |
| Jurkat | ELK1  | path:04010_11 |
| Jurkat | ELK1  | path:05020_3  |
| Jurkat | ELK1  | path:05020_4  |
| Jurkat | ELK1  | path:05110_3  |
| Jurkat | ELK1  | path:05200_18 |
| Jurkat | ELK1  | path:05200_26 |
| Jurkat | FLI1  | path:04512_3  |
| Jurkat | FLI1  | path:04512_1  |
| Jurkat | KLF4  | path:04110_5  |
| Jurkat | KLF4  | path:04110_1  |
| Jurkat | KLF4  | path:04110_13 |
| Jurkat | KLF4  | path:04110_11 |
| Jurkat | KLF4  | path:04110_9  |
| Jurkat | KLF4  | path:04110_10 |
| Jurkat | KLF4  | path:04115_2  |
| Jurkat | KLF4  | path:05145_11 |
| Jurkat | KLF4  | path:05200_15 |
| Jurkat | KLF4  | path:05200_25 |
| Jurkat | KLF4  | path:05200_9  |
| Jurkat | KLF4  | path:05200_35 |
| Jurkat | KLF4  | path:05200_13 |
| Jurkat | KLF4  | path:05200_2  |
| Jurkat | KLF4  | path:05200_33 |
| Jurkat | KLF4  | path:05200_37 |
| Jurkat | KLF4  | path:05200_39 |
| Jurkat | KLF4  | path:05200_21 |
| Jurkat | KLF4  | path:05200_14 |
| Jurkat | KLF4  | path:05200_38 |
| Jurkat | KLF4  | path:05210_5  |
| Jurkat | KLF4  | path:05210_8  |
| Jurkat | KLF4  | path:05214_3  |
| Jurkat | KLF4  | path:05219_5  |
| Jurkat | KLF4  | path:05219_3  |
| Jurkat | KLF4  | path:05220_4  |
| Jurkat | RELA  | path:04060_44 |
| Jurkat | RELA  | path:04060_35 |
| Jurkat | RELA  | path:04062_1  |
| Jurkat | RELA  | path:04062_2  |
| Jurkat | RELA  | path:04110_2  |
| Jurkat | RELA  | path:04110_10 |
| Jurkat | RELA  | path:04110_1  |
| Jurkat | RELA  | path:04110_9  |



|        |      |               |
|--------|------|---------------|
| Jurkat | RELA | path:04110_7  |
| Jurkat | RELA | path:04110_11 |
| Jurkat | RELA | path:04110_5  |
| Jurkat | RELA | path:04115_2  |
| Jurkat | RELA | path:04612_5  |
| Jurkat | RELA | path:04620_5  |
| Jurkat | RELA | path:04620_8  |
| Jurkat | RELA | path:04620_1  |
| Jurkat | RELA | path:04620_7  |
| Jurkat | RELA | path:04620_9  |
| Jurkat | RELA | path:04620_4  |
| Jurkat | RELA | path:04620_3  |
| Jurkat | RELA | path:04620_6  |
| Jurkat | RELA | path:04650_5  |
| Jurkat | RELA | path:04650_13 |
| Jurkat | RELA | path:04650_3  |
| Jurkat | RELA | path:04650_15 |
| Jurkat | RELA | path:04650_14 |
| Jurkat | RELA | path:04670_6  |
| Jurkat | RELA | path:04670_8  |
| Jurkat | RELA | path:04670_4  |
| Jurkat | RELA | path:04670_9  |
| Jurkat | RELA | path:04670_2  |
| Jurkat | RELA | path:05142_3  |
| Jurkat | RELA | path:05200_37 |
| Jurkat | RELA | path:05200_35 |
| Jurkat | RELA | path:05200_39 |
| Jurkat | RELA | path:05200_15 |
| Jurkat | RELA | path:05200_25 |
| Jurkat | RELA | path:05200_13 |
| Jurkat | RELA | path:05200_21 |
| Jurkat | RELA | path:05200_38 |
| Jurkat | RELA | path:05200_2  |
| Jurkat | RELA | path:05219_3  |
| K562   | EGR1 | path:04144_2  |
| K562   | EGR1 | path:04350_5  |
| K562   | EGR1 | path:04350_1  |
| K562   | EGR1 | path:04510_6  |
| K562   | EGR1 | path:04510_13 |
| K562   | EGR1 | path:04510_7  |
| K562   | EGR1 | path:04510_5  |
| K562   | EGR1 | path:04510_12 |
| K562   | EGR1 | path:04512_1  |
| K562   | EGR1 | path:04512_2  |

|      |        |               |
|------|--------|---------------|
| K562 | EGR1   | path:04512_3  |
| K562 | EGR1   | path:05020_2  |
| K562 | EGR1   | path:05200_24 |
| K562 | EGR1   | path:05200_29 |
| K562 | EGR1   | path:05200_37 |
| K562 | EGR1   | path:05200_35 |
| K562 | EGR1   | path:05200_16 |
| K562 | EGR1   | path:05200_31 |
| K562 | EGR1   | path:05200_30 |
| K562 | EGR1   | path:05200_25 |
| K562 | EGR1   | path:05212_3  |
| K562 | EGR1   | path:05212_8  |
| K562 | EGR1   | path:05215_7  |
| K562 | EGR1   | path:05215_9  |
| K562 | EGR1   | path:05218_4  |
| K562 | ELK1   | path:04010_11 |
| K562 | ELK1   | path:04010_4  |
| K562 | ELK1   | path:05020_3  |
| K562 | ELK1   | path:05020_4  |
| K562 | ELK1   | path:05110_3  |
| K562 | ELK1   | path:05200_18 |
| K562 | ELK1   | path:05200_26 |
| K562 | FOS    | path:04115_2  |
| K562 | FOS    | path:04310_7  |
| K562 | FOS    | path:04610_6  |
| K562 | FOS    | path:04610_7  |
| K562 | FOS    | path:04620_6  |
| K562 | FOS    | path:04620_5  |
| K562 | FOS    | path:04620_8  |
| K562 | FOS    | path:04620_9  |
| K562 | FOS    | path:04670_2  |
| K562 | FOS    | path:05200_24 |
| K562 | FOS    | path:05200_25 |
| K562 | FOS    | path:05200_38 |
| K562 | FOS    | path:05200_39 |
| K562 | FOS    | path:05200_35 |
| K562 | FOS    | path:05200_37 |
| K562 | FOS    | path:05219_3  |
| K562 | GATA1  | path:04060_32 |
| K562 | NFE2L2 | path:00480_1  |
| K562 | RELA   | path:04060_44 |
| K562 | RELA   | path:04060_35 |
| K562 | RELA   | path:04062_1  |
| K562 | RELA   | path:04062_2  |

|              |       |               |
|--------------|-------|---------------|
| K562         | RELA  | path:04110_10 |
| K562         | RELA  | path:04110_1  |
| K562         | RELA  | path:04110_2  |
| K562         | RELA  | path:04110_9  |
| K562         | RELA  | path:04110_11 |
| K562         | RELA  | path:04110_5  |
| K562         | RELA  | path:04110_7  |
| K562         | RELA  | path:04115_2  |
| K562         | RELA  | path:04612_5  |
| K562         | RELA  | path:04620_5  |
| K562         | RELA  | path:04620_8  |
| K562         | RELA  | path:04620_9  |
| K562         | RELA  | path:04620_1  |
| K562         | RELA  | path:04620_7  |
| K562         | RELA  | path:04620_3  |
| K562         | RELA  | path:04620_6  |
| K562         | RELA  | path:04620_4  |
| K562         | RELA  | path:04650_3  |
| K562         | RELA  | path:04650_5  |
| K562         | RELA  | path:04650_13 |
| K562         | RELA  | path:04650_14 |
| K562         | RELA  | path:04650_15 |
| K562         | RELA  | path:04670_6  |
| K562         | RELA  | path:04670_2  |
| K562         | RELA  | path:04670_4  |
| K562         | RELA  | path:04670_8  |
| K562         | RELA  | path:04670_9  |
| K562         | RELA  | path:05142_3  |
| K562         | RELA  | path:05200_37 |
| K562         | RELA  | path:05200_35 |
| K562         | RELA  | path:05200_15 |
| K562         | RELA  | path:05200_25 |
| K562         | RELA  | path:05200_39 |
| K562         | RELA  | path:05200_13 |
| K562         | RELA  | path:05200_21 |
| K562         | RELA  | path:05200_38 |
| K562         | RELA  | path:05200_2  |
| K562         | RELA  | path:05219_3  |
| Keratinocyte | CEBPA | path:04060_37 |
| Keratinocyte | CEBPA | path:04610_2  |
| Keratinocyte | CEBPA | path:04610_1  |
| Keratinocyte | CEBPA | path:04610_4  |
| Keratinocyte | CEBPA | path:04610_5  |
| Keratinocyte | CEBPA | path:04610_3  |

|              |        |               |
|--------------|--------|---------------|
| Keratinocyte | TFAP2A | path:04010_7  |
| Keratinocyte | TFAP2A | path:04012_5  |
| Keratinocyte | TFAP2A | path:04020_1  |
| Keratinocyte | TFAP2A | path:04080_5  |
| Keratinocyte | TFAP2A | path:04144_2  |
| Keratinocyte | TFAP2A | path:04510_5  |
| Keratinocyte | TFAP2A | path:04510_19 |
| Keratinocyte | TFAP2A | path:04510_13 |
| Keratinocyte | TFAP2A | path:04510_4  |
| Keratinocyte | TFAP2A | path:04510_7  |
| Keratinocyte | TFAP2A | path:04510_12 |
| Keratinocyte | TFAP2A | path:04510_6  |
| Keratinocyte | TFAP2A | path:04520_5  |
| Keratinocyte | TFAP2A | path:04520_3  |
| Keratinocyte | TFAP2A | path:04520_2  |
| Keratinocyte | TFAP2A | path:04520_7  |
| Keratinocyte | TFAP2A | path:04912_7  |
| Keratinocyte | TFAP2A | path:05200_24 |
| Keratinocyte | TFAP2A | path:05200_29 |
| Keratinocyte | TFAP2A | path:05200_37 |
| Keratinocyte | TFAP2A | path:05200_6  |
| Keratinocyte | TFAP2A | path:05200_7  |
| Keratinocyte | TFAP2A | path:05200_8  |
| Keratinocyte | TFAP2A | path:05200_16 |
| Keratinocyte | TFAP2A | path:05200_26 |
| Keratinocyte | TFAP2A | path:05200_25 |
| Keratinocyte | TFAP2A | path:05200_17 |
| Keratinocyte | TFAP2A | path:05200_9  |
| Keratinocyte | TFAP2A | path:05200_39 |
| Keratinocyte | TFAP2A | path:05200_35 |
| Keratinocyte | TFAP2A | path:05200_2  |
| Keratinocyte | TFAP2A | path:05200_19 |
| Keratinocyte | TFAP2A | path:05200_10 |
| Keratinocyte | TFAP2A | path:05200_38 |
| Keratinocyte | TFAP2A | path:05200_30 |
| Keratinocyte | TFAP2A | path:05212_3  |
| Keratinocyte | TFAP2A | path:05212_8  |
| Keratinocyte | TFAP2A | path:05214_2  |
| Keratinocyte | TFAP2A | path:05214_1  |
| Keratinocyte | TFAP2A | path:05215_8  |
| Keratinocyte | TFAP2A | path:05215_9  |
| Keratinocyte | TFAP2A | path:05215_7  |
| Keratinocyte | TFAP2A | path:05215_10 |
| Keratinocyte | TFAP2A | path:05219_2  |

|              |        |               |
|--------------|--------|---------------|
| Keratinocyte | TFAP2A | path:05223_1  |
| Keratinocyte | TP63   | path:04110_5  |
| Keratinocyte | TP63   | path:04110_10 |
| Keratinocyte | TP63   | path:04110_11 |
| Keratinocyte | TP63   | path:04110_1  |
| Keratinocyte | TP63   | path:04110_9  |
| Keratinocyte | TP63   | path:04110_2  |
| Keratinocyte | TP63   | path:04110_7  |
| Keratinocyte | TP63   | path:04115_2  |
| Keratinocyte | TP63   | path:05200_15 |
| Keratinocyte | TP63   | path:05200_2  |
| Keratinocyte | TP63   | path:05200_7  |
| Keratinocyte | TP63   | path:05200_39 |
| Keratinocyte | TP63   | path:05200_9  |
| Keratinocyte | TP63   | path:05200_37 |
| Keratinocyte | TP63   | path:05200_1  |
| Keratinocyte | TP63   | path:05200_19 |
| Keratinocyte | TP63   | path:05200_14 |
| Keratinocyte | TP63   | path:05200_20 |
| Keratinocyte | TP63   | path:05200_3  |
| Keratinocyte | TP63   | path:05200_13 |
| Keratinocyte | TP63   | path:05200_21 |
| Keratinocyte | TP63   | path:05200_25 |
| Keratinocyte | TP63   | path:05214_3  |
| Keratinocyte | TP63   | path:05215_4  |
| Keratinocyte | TP63   | path:05215_10 |
| Keratinocyte | TP63   | path:05215_9  |
| Keratinocyte | TP63   | path:05215_6  |
| Keratinocyte | TP63   | path:05218_5  |
| Keratinocyte | TP63   | path:05218_3  |
| Keratinocyte | TP63   | path:05219_5  |
| Keratinocyte | TP63   | path:05219_3  |
| Keratinocyte | TP63   | path:05220_4  |
| kidney       | CREB1  | path:04514_19 |
| kidney       | CREB1  | path:04612_3  |
| kidney       | CREB1  | path:04620_6  |
| kidney       | CREB1  | path:04620_9  |
| kidney       | CREB1  | path:04620_5  |
| kidney       | CREB1  | path:04620_8  |
| kidney       | CREB1  | path:04620_4  |
| kidney       | CREB1  | path:05142_3  |
| kidney       | FOXO3  | path:04920_2  |
| kidney       | HNF1A  | path:00140_1  |
| kidney       | HNF1A  | path:00980_1  |

|          |        |               |
|----------|--------|---------------|
| kidney   | HNF1A  | path:00982_2  |
| kidney   | HNF1A  | path:04610_2  |
| kidney   | HNF1A  | path:04610_6  |
| kidney   | HNF1A  | path:04610_3  |
| kidney   | HNF1A  | path:04610_4  |
| kidney   | HNF1A  | path:04950_3  |
| kidney   | HNF4A  | path:00010_1  |
| kidney   | HNF4A  | path:00120_1  |
| kidney   | HNF4A  | path:00140_1  |
| kidney   | HNF4A  | path:00561_2  |
| kidney   | HNF4A  | path:00590_2  |
| kidney   | HNF4A  | path:00590_1  |
| kidney   | HNF4A  | path:00591_1  |
| kidney   | HNF4A  | path:00830_1  |
| kidney   | HNF4A  | path:00980_1  |
| kidney   | HNF4A  | path:00982_2  |
| kidney   | HNF4A  | path:03320_1  |
| kidney   | HNF4A  | path:04610_7  |
| kidney   | HNF4A  | path:04610_6  |
| kidney   | HNF4A  | path:04610_1  |
| kidney   | HNF4A  | path:04610_5  |
| kidney   | HNF4A  | path:04610_3  |
| kidney   | HNF4A  | path:04610_2  |
| kidney   | HNF4A  | path:04610_4  |
| kidney   | HNF4A  | path:04950_2  |
| kidney   | HNF4A  | path:04950_3  |
| kidney   | NR1I3  | path:00830_1  |
| kidney   | NR1I3  | path:00980_1  |
| kidney   | NR1I3  | path:00982_2  |
| kidney   | SREBF1 | path:04910_4  |
| kidney   | SREBF1 | path:04910_1  |
| leukemia | SPI1   | path:04060_26 |
| leukemia | SPI1   | path:04145_4  |
| leukemia | SPI1   | path:04145_1  |
| leukemia | SPI1   | path:04620_3  |
| leukemia | SPI1   | path:04620_4  |
| leukemia | SPI1   | path:04620_1  |
| leukemia | SPI1   | path:04650_7  |
| leukemia | SPI1   | path:04650_1  |
| leukemia | SPI1   | path:04670_2  |
| leukemia | SPI1   | path:04670_9  |
| leukemia | SPI1   | path:04670_8  |
| leukemia | SPI1   | path:04670_4  |
| leukemia | SPI1   | path:04670_6  |

|          |       |               |
|----------|-------|---------------|
| leukemia | SPI1  | path:04810_16 |
| leukemia | SPI1  | path:05140_3  |
| leukemia | SPI1  | path:05140_2  |
| leukemia | SPI1  | path:05146_1  |
| leukemia | SPI1  | path:05150_4  |
| leukemia | SPI1  | path:05200_34 |
| leukemia | TP73  | path:04115_2  |
| leukemia | TP73  | path:04722_15 |
| leukemia | TP73  | path:05200_33 |
| liver    | AKNA  | path:04060_18 |
| liver    | AKNA  | path:04514_8  |
| liver    | AKNA  | path:04672_2  |
| liver    | AKNA  | path:05144_4  |
| liver    | AKNA  | path:05145_14 |
| liver    | AKNA  | path:05310_1  |
| liver    | AKNA  | path:05320_1  |
| liver    | AKNA  | path:05322_3  |
| liver    | AKNA  | path:05330_1  |
| liver    | AKNA  | path:05416_3  |
| liver    | CREB1 | path:04514_19 |
| liver    | CREB1 | path:04612_3  |
| liver    | CREB1 | path:04620_9  |
| liver    | CREB1 | path:04620_8  |
| liver    | CREB1 | path:04620_4  |
| liver    | CREB1 | path:04620_6  |
| liver    | CREB1 | path:04620_5  |
| liver    | CREB1 | path:05142_3  |
| liver    | FOXA2 | path:00980_1  |
| liver    | FOXA2 | path:04610_1  |
| liver    | FOXA2 | path:04610_3  |
| liver    | FOXA2 | path:04610_2  |
| liver    | FOXA2 | path:04610_4  |
| liver    | FOXA2 | path:04610_5  |
| liver    | FOXA3 | path:00140_1  |
| liver    | FOXA3 | path:00591_1  |
| liver    | FOXA3 | path:00830_1  |
| liver    | FOXA3 | path:00980_1  |
| liver    | FOXA3 | path:00982_2  |
| liver    | FOXO3 | path:04920_2  |
| liver    | HNF1A | path:00140_1  |
| liver    | HNF1A | path:00980_1  |
| liver    | HNF1A | path:00982_2  |
| liver    | HNF1A | path:04610_2  |
| liver    | HNF1A | path:04610_3  |

|       |       |               |
|-------|-------|---------------|
| liver | HNF1A | path:04610_6  |
| liver | HNF1A | path:04610_4  |
| liver | HNF1A | path:04950_3  |
| liver | HNF4A | path:00010_1  |
| liver | HNF4A | path:00120_1  |
| liver | HNF4A | path:00140_1  |
| liver | HNF4A | path:00561_2  |
| liver | HNF4A | path:00590_1  |
| liver | HNF4A | path:00590_2  |
| liver | HNF4A | path:00591_1  |
| liver | HNF4A | path:00830_1  |
| liver | HNF4A | path:00980_1  |
| liver | HNF4A | path:00982_2  |
| liver | HNF4A | path:03320_1  |
| liver | HNF4A | path:04610_1  |
| liver | HNF4A | path:04610_6  |
| liver | HNF4A | path:04610_7  |
| liver | HNF4A | path:04610_2  |
| liver | HNF4A | path:04610_5  |
| liver | HNF4A | path:04610_3  |
| liver | HNF4A | path:04610_4  |
| liver | HNF4A | path:04950_2  |
| liver | HNF4A | path:04950_3  |
| liver | NR1I2 | path:00830_1  |
| liver | NR1I2 | path:00980_1  |
| liver | NR1I2 | path:00982_2  |
| liver | NR1I3 | path:00830_1  |
| liver | NR1I3 | path:00980_1  |
| liver | NR1I3 | path:00982_2  |
| liver | NR4A1 | path:00140_1  |
| liver | SPI1  | path:04060_26 |
| liver | SPI1  | path:04145_1  |
| liver | SPI1  | path:04145_4  |
| liver | SPI1  | path:04620_4  |
| liver | SPI1  | path:04620_3  |
| liver | SPI1  | path:04620_1  |
| liver | SPI1  | path:04650_1  |
| liver | SPI1  | path:04650_7  |
| liver | SPI1  | path:04670_6  |
| liver | SPI1  | path:04670_2  |
| liver | SPI1  | path:04670_4  |
| liver | SPI1  | path:04670_9  |
| liver | SPI1  | path:04670_8  |
| liver | SPI1  | path:04810_16 |



|       |        |               |
|-------|--------|---------------|
| liver | SPI1   | path:05140_2  |
| liver | SPI1   | path:05140_3  |
| liver | SPI1   | path:05146_1  |
| liver | SPI1   | path:05150_4  |
| liver | SPI1   | path:05200_34 |
| liver | SREBF1 | path:04910_4  |
| liver | SREBF1 | path:04910_1  |
| LNCaP | NFIC   | path:00140_1  |
| LNCaP | NFIC   | path:00591_1  |
| LNCaP | NFIC   | path:04010_22 |
| LNCaP | NFIC   | path:04080_5  |
| LNCaP | NFIC   | path:04115_2  |
| LNCaP | NFIC   | path:04510_6  |
| LNCaP | NFIC   | path:04512_2  |
| LNCaP | NFIC   | path:04660_10 |
| LNCaP | NFIC   | path:04660_9  |
| LNCaP | NFIC   | path:04662_9  |
| LNCaP | NFIC   | path:04662_5  |
| LNCaP | NFIC   | path:04722_15 |
| LNCaP | NFIC   | path:05200_18 |
| LNCaP | NFIC   | path:05200_2  |
| LNCaP | NFIC   | path:05200_37 |
| LNCaP | NFIC   | path:05200_7  |
| LNCaP | NFIC   | path:05200_13 |
| LNCaP | NFIC   | path:05200_39 |
| LNCaP | NFIC   | path:05200_24 |
| LNCaP | NFIC   | path:05200_26 |
| LNCaP | NFIC   | path:05200_25 |
| LNCaP | NFIC   | path:05200_6  |
| LNCaP | NFIC   | path:05200_21 |
| LNCaP | NFIC   | path:05200_15 |
| LNCaP | NFIC   | path:05214_3  |
| LNCaP | NFIC   | path:05218_3  |
| LNCaP | NFIC   | path:05218_1  |
| LNCaP | NFIC   | path:05218_2  |
| LNCaP | NFIC   | path:05219_3  |
| LNCaP | NFIC   | path:05220_4  |
| lung  | ELK1   | path:04010_11 |
| lung  | ELK1   | path:04010_4  |
| lung  | ELK1   | path:05020_3  |
| lung  | ELK1   | path:05020_4  |
| lung  | ELK1   | path:05110_3  |
| lung  | ELK1   | path:05200_26 |
| lung  | ELK1   | path:05200_18 |

|            |        |               |
|------------|--------|---------------|
| lung       | FOXO3  | path:04920_2  |
| lung       | HIF1A  | path:05200_37 |
| lung       | HIF1A  | path:05200_39 |
| lung       | HIF1A  | path:05200_25 |
| lung       | NR1I3  | path:00830_1  |
| lung       | NR1I3  | path:00980_1  |
| lung       | NR1I3  | path:00982_2  |
| lung       | SREBF1 | path:04910_4  |
| lung       | SREBF1 | path:04910_1  |
| lung       | TP63   | path:04110_5  |
| lung       | TP63   | path:04110_1  |
| lung       | TP63   | path:04110_11 |
| lung       | TP63   | path:04110_2  |
| lung       | TP63   | path:04110_10 |
| lung       | TP63   | path:04110_9  |
| lung       | TP63   | path:04110_7  |
| lung       | TP63   | path:04115_2  |
| lung       | TP63   | path:05200_2  |
| lung       | TP63   | path:05200_39 |
| lung       | TP63   | path:05200_9  |
| lung       | TP63   | path:05200_37 |
| lung       | TP63   | path:05200_3  |
| lung       | TP63   | path:05200_14 |
| lung       | TP63   | path:05200_15 |
| lung       | TP63   | path:05200_7  |
| lung       | TP63   | path:05200_1  |
| lung       | TP63   | path:05200_25 |
| lung       | TP63   | path:05200_13 |
| lung       | TP63   | path:05200_20 |
| lung       | TP63   | path:05200_19 |
| lung       | TP63   | path:05200_21 |
| lung       | TP63   | path:05214_3  |
| lung       | TP63   | path:05215_4  |
| lung       | TP63   | path:05215_6  |
| lung       | TP63   | path:05215_10 |
| lung       | TP63   | path:05215_9  |
| lung       | TP63   | path:05218_5  |
| lung       | TP63   | path:05218_3  |
| lung       | TP63   | path:05219_5  |
| lung       | TP63   | path:05219_3  |
| lung       | TP63   | path:05220_4  |
| lymph node | AKNA   | path:04060_18 |
| lymph node | AKNA   | path:04514_8  |
| lymph node | AKNA   | path:04672_2  |

|             |       |               |
|-------------|-------|---------------|
| lymph node  | AKNA  | path:05144_4  |
| lymph node  | AKNA  | path:05145_14 |
| lymph node  | AKNA  | path:05310_1  |
| lymph node  | AKNA  | path:05320_1  |
| lymph node  | AKNA  | path:05322_3  |
| lymph node  | AKNA  | path:05330_1  |
| lymph node  | AKNA  | path:05416_3  |
| lymph node  | IRF5  | path:04060_23 |
| lymph node  | IRF5  | path:04620_1  |
| lymph node  | IRF5  | path:04620_3  |
| lymph node  | IRF5  | path:04620_7  |
| lymph node  | IRF5  | path:04620_2  |
| lymph node  | IRF5  | path:04620_4  |
| lymph node  | IRF5  | path:04650_5  |
| lymph node  | IRF5  | path:04650_3  |
| lymph node  | IRF5  | path:05160_4  |
| lymph node  | IRF7  | path:04060_23 |
| lymph node  | IRF7  | path:04620_8  |
| lymph node  | IRF7  | path:04620_4  |
| lymph node  | IRF7  | path:04620_7  |
| lymph node  | IRF7  | path:04620_1  |
| lymph node  | IRF7  | path:04620_3  |
| lymph node  | IRF7  | path:04620_5  |
| lymph node  | IRF7  | path:04620_6  |
| lymph node  | IRF7  | path:04620_9  |
| lymph node  | IRF7  | path:04620_2  |
| lymph node  | IRF7  | path:04650_5  |
| lymph node  | IRF7  | path:04650_3  |
| lymph node  | IRF7  | path:05160_4  |
| lymph node  | TP73  | path:04115_2  |
| lymph node  | TP73  | path:04722_15 |
| lymph node  | TP73  | path:05200_33 |
| lymphocytes | AKNA  | path:04060_18 |
| lymphocytes | AKNA  | path:04514_8  |
| lymphocytes | AKNA  | path:04672_2  |
| lymphocytes | AKNA  | path:05144_4  |
| lymphocytes | AKNA  | path:05145_14 |
| lymphocytes | AKNA  | path:05310_1  |
| lymphocytes | AKNA  | path:05320_1  |
| lymphocytes | AKNA  | path:05322_3  |
| lymphocytes | AKNA  | path:05330_1  |
| lymphocytes | AKNA  | path:05416_3  |
| lymphocytes | CREB1 | path:04514_19 |
| lymphocytes | CREB1 | path:04612_3  |

|             |       |               |
|-------------|-------|---------------|
| lymphocytes | CREB1 | path:04620_9  |
| lymphocytes | CREB1 | path:04620_6  |
| lymphocytes | CREB1 | path:04620_8  |
| lymphocytes | CREB1 | path:04620_5  |
| lymphocytes | CREB1 | path:04620_4  |
| lymphocytes | CREB1 | path:05142_3  |
| lymphocytes | FLI1  | path:04512_1  |
| lymphocytes | FLI1  | path:04512_3  |
| lymphocytes | NFYA  | path:04110_9  |
| lymphocytes | NFYA  | path:04110_6  |
| lymphocytes | NFYA  | path:04110_11 |
| lymphocytes | NFYA  | path:04110_10 |
| lymphocytes | NFYA  | path:04110_7  |
| lymphocytes | NFYA  | path:04110_5  |
| lymphocytes | NFYA  | path:04110_2  |
| lymphocytes | NFYA  | path:04110_1  |
| lymphocytes | NFYA  | path:04110_4  |
| lymphocytes | NFYA  | path:04115_2  |
| lymphocytes | TP53  | path:04010_11 |
| lymphocytes | TP53  | path:04012_1  |
| lymphocytes | TP53  | path:04012_5  |
| lymphocytes | TP53  | path:04110_9  |
| lymphocytes | TP53  | path:04110_13 |
| lymphocytes | TP53  | path:04110_7  |
| lymphocytes | TP53  | path:04110_2  |
| lymphocytes | TP53  | path:04110_11 |
| lymphocytes | TP53  | path:04110_6  |
| lymphocytes | TP53  | path:04110_1  |
| lymphocytes | TP53  | path:04110_10 |
| lymphocytes | TP53  | path:04110_5  |
| lymphocytes | TP53  | path:04115_2  |
| lymphocytes | TP53  | path:04210_8  |
| lymphocytes | TP53  | path:04210_9  |
| lymphocytes | TP53  | path:04360_3  |
| lymphocytes | TP53  | path:04510_19 |
| lymphocytes | TP53  | path:04510_6  |
| lymphocytes | TP53  | path:04510_12 |
| lymphocytes | TP53  | path:04510_4  |
| lymphocytes | TP53  | path:04510_13 |
| lymphocytes | TP53  | path:04650_3  |
| lymphocytes | TP53  | path:04722_15 |
| lymphocytes | TP53  | path:04912_7  |
| lymphocytes | TP53  | path:05014_2  |
| lymphocytes | TP53  | path:05160_9  |

|             |       |               |
|-------------|-------|---------------|
| lymphocytes | TP53  | path:05160_10 |
| lymphocytes | TP53  | path:05200_6  |
| lymphocytes | TP53  | path:05200_15 |
| lymphocytes | TP53  | path:05200_7  |
| lymphocytes | TP53  | path:05200_24 |
| lymphocytes | TP53  | path:05200_25 |
| lymphocytes | TP53  | path:05200_38 |
| lymphocytes | TP53  | path:05200_14 |
| lymphocytes | TP53  | path:05200_16 |
| lymphocytes | TP53  | path:05200_9  |
| lymphocytes | TP53  | path:05200_13 |
| lymphocytes | TP53  | path:05200_2  |
| lymphocytes | TP53  | path:05200_20 |
| lymphocytes | TP53  | path:05200_26 |
| lymphocytes | TP53  | path:05200_3  |
| lymphocytes | TP53  | path:05200_17 |
| lymphocytes | TP53  | path:05200_18 |
| lymphocytes | TP53  | path:05200_37 |
| lymphocytes | TP53  | path:05200_10 |
| lymphocytes | TP53  | path:05200_1  |
| lymphocytes | TP53  | path:05200_39 |
| lymphocytes | TP53  | path:05200_8  |
| lymphocytes | TP53  | path:05200_19 |
| lymphocytes | TP53  | path:05200_21 |
| lymphocytes | TP53  | path:05213_3  |
| lymphocytes | TP53  | path:05214_2  |
| lymphocytes | TP53  | path:05214_1  |
| lymphocytes | TP53  | path:05214_3  |
| lymphocytes | TP53  | path:05215_6  |
| lymphocytes | TP53  | path:05215_9  |
| lymphocytes | TP53  | path:05215_7  |
| lymphocytes | TP53  | path:05215_4  |
| lymphocytes | TP53  | path:05215_10 |
| lymphocytes | TP53  | path:05218_2  |
| lymphocytes | TP53  | path:05218_1  |
| lymphocytes | TP53  | path:05218_3  |
| lymphocytes | TP53  | path:05218_5  |
| lymphocytes | TP53  | path:05219_3  |
| lymphocytes | TP53  | path:05219_5  |
| lymphocytes | TP53  | path:05220_4  |
| lymphocytes | TP53  | path:05223_2  |
| macrophages | CEBPA | path:04060_37 |
| macrophages | CEBPA | path:04610_5  |
| macrophages | CEBPA | path:04610_1  |

|             |       |               |
|-------------|-------|---------------|
| macrophages | CEBPA | path:04610_2  |
| macrophages | CEBPA | path:04610_4  |
| macrophages | CEBPA | path:04610_3  |
| macrophages | SPI1  | path:04060_26 |
| macrophages | SPI1  | path:04145_1  |
| macrophages | SPI1  | path:04145_4  |
| macrophages | SPI1  | path:04620_4  |
| macrophages | SPI1  | path:04620_3  |
| macrophages | SPI1  | path:04620_1  |
| macrophages | SPI1  | path:04650_1  |
| macrophages | SPI1  | path:04650_7  |
| macrophages | SPI1  | path:04670_9  |
| macrophages | SPI1  | path:04670_6  |
| macrophages | SPI1  | path:04670_8  |
| macrophages | SPI1  | path:04670_4  |
| macrophages | SPI1  | path:04670_2  |
| macrophages | SPI1  | path:04810_16 |
| macrophages | SPI1  | path:05140_3  |
| macrophages | SPI1  | path:05140_2  |
| macrophages | SPI1  | path:05146_1  |
| macrophages | SPI1  | path:05150_4  |
| macrophages | SPI1  | path:05200_34 |
| MCF7        | E2F1  | path:04110_13 |
| MCF7        | E2F1  | path:04110_2  |
| MCF7        | E2F1  | path:04110_4  |
| MCF7        | E2F1  | path:04110_10 |
| MCF7        | E2F1  | path:04110_9  |
| MCF7        | E2F1  | path:04110_5  |
| MCF7        | E2F1  | path:04110_1  |
| MCF7        | E2F1  | path:04110_7  |
| MCF7        | E2F1  | path:04110_6  |
| MCF7        | E2F1  | path:04110_11 |
| MCF7        | E2F1  | path:04115_2  |
| MCF7        | E2F1  | path:04210_5  |
| MCF7        | E2F1  | path:04510_10 |
| MCF7        | E2F1  | path:05014_2  |
| MCF7        | E2F1  | path:05200_35 |
| MCF7        | E2F1  | path:05200_25 |
| MCF7        | E2F1  | path:05200_37 |
| MCF7        | E2F1  | path:05200_2  |
| MCF7        | E2F1  | path:05200_26 |
| MCF7        | E2F1  | path:05200_33 |
| MCF7        | E2F1  | path:05200_15 |
| MCF7        | E2F1  | path:05200_38 |

|      |      |               |
|------|------|---------------|
| MCF7 | E2F1 | path:05200_13 |
| MCF7 | E2F1 | path:05200_21 |
| MCF7 | E2F1 | path:05200_18 |
| MCF7 | E2F1 | path:05200_39 |
| MCF7 | E2F1 | path:05212_9  |
| MCF7 | E2F1 | path:05214_3  |
| MCF7 | E2F1 | path:05215_3  |
| MCF7 | E2F1 | path:05218_5  |
| MCF7 | E2F1 | path:05218_3  |
| MCF7 | E2F1 | path:05219_3  |
| MCF7 | E2F1 | path:05219_5  |
| MCF7 | E2F1 | path:05220_4  |
| MCF7 | E2F1 | path:05222_1  |
| MCF7 | E2F1 | path:05222_5  |
| MCF7 | E2F1 | path:05223_4  |
| MCF7 | E2F1 | path:05223_3  |
| MCF7 | ESR1 | path:00830_1  |
| MCF7 | ESR1 | path:00980_1  |
| MCF7 | ESR1 | path:00982_2  |
| MCF7 | ESR1 | path:04115_2  |
| MCF7 | ESR1 | path:04610_7  |
| MCF7 | ESR1 | path:04610_2  |
| MCF7 | ESR1 | path:04610_6  |
| MCF7 | ESR1 | path:05200_35 |
| MCF7 | ESR1 | path:05200_37 |
| MCF7 | ESR1 | path:05200_30 |
| MCF7 | ESR1 | path:05200_21 |
| MCF7 | ESR1 | path:05200_38 |
| MCF7 | ESR1 | path:05200_15 |
| MCF7 | ESR1 | path:05200_24 |
| MCF7 | ESR1 | path:05200_25 |
| MCF7 | ESR1 | path:05200_39 |
| MCF7 | ESR1 | path:05212_8  |
| MCF7 | ESR1 | path:05219_3  |
| MCF7 | FOS  | path:04115_2  |
| MCF7 | FOS  | path:04310_7  |
| MCF7 | FOS  | path:04610_6  |
| MCF7 | FOS  | path:04610_7  |
| MCF7 | FOS  | path:04620_8  |
| MCF7 | FOS  | path:04620_9  |
| MCF7 | FOS  | path:04620_5  |
| MCF7 | FOS  | path:04620_6  |
| MCF7 | FOS  | path:04670_2  |
| MCF7 | FOS  | path:05200_24 |

|      |       |               |
|------|-------|---------------|
| MCF7 | FOS   | path:05200_38 |
| MCF7 | FOS   | path:05200_39 |
| MCF7 | FOS   | path:05200_25 |
| MCF7 | FOS   | path:05200_37 |
| MCF7 | FOS   | path:05200_35 |
| MCF7 | FOS   | path:05219_3  |
| MCF7 | GATA1 | path:04060_32 |
| MCF7 | NFIC  | path:00140_1  |
| MCF7 | NFIC  | path:00591_1  |
| MCF7 | NFIC  | path:04010_22 |
| MCF7 | NFIC  | path:04080_5  |
| MCF7 | NFIC  | path:04115_2  |
| MCF7 | NFIC  | path:04510_6  |
| MCF7 | NFIC  | path:04512_2  |
| MCF7 | NFIC  | path:04660_10 |
| MCF7 | NFIC  | path:04660_9  |
| MCF7 | NFIC  | path:04662_9  |
| MCF7 | NFIC  | path:04662_5  |
| MCF7 | NFIC  | path:04722_15 |
| MCF7 | NFIC  | path:05200_2  |
| MCF7 | NFIC  | path:05200_7  |
| MCF7 | NFIC  | path:05200_24 |
| MCF7 | NFIC  | path:05200_13 |
| MCF7 | NFIC  | path:05200_25 |
| MCF7 | NFIC  | path:05200_6  |
| MCF7 | NFIC  | path:05200_26 |
| MCF7 | NFIC  | path:05200_37 |
| MCF7 | NFIC  | path:05200_18 |
| MCF7 | NFIC  | path:05200_15 |
| MCF7 | NFIC  | path:05200_21 |
| MCF7 | NFIC  | path:05200_39 |
| MCF7 | NFIC  | path:05214_3  |
| MCF7 | NFIC  | path:05218_1  |
| MCF7 | NFIC  | path:05218_3  |
| MCF7 | NFIC  | path:05218_2  |
| MCF7 | NFIC  | path:05219_3  |
| MCF7 | NFIC  | path:05220_4  |
| MCF7 | SP1   | path:00140_1  |
| MCF7 | SP1   | path:00330_5  |
| MCF7 | SP1   | path:00330_1  |
| MCF7 | SP1   | path:00330_4  |
| MCF7 | SP1   | path:00330_3  |
| MCF7 | SP1   | path:00350_2  |
| MCF7 | SP1   | path:00590_2  |



|      |     |               |
|------|-----|---------------|
| MCF7 | SP1 | path:00980_1  |
| MCF7 | SP1 | path:04010_7  |
| MCF7 | SP1 | path:04010_6  |
| MCF7 | SP1 | path:04010_8  |
| MCF7 | SP1 | path:04060_10 |
| MCF7 | SP1 | path:04060_20 |
| MCF7 | SP1 | path:04060_19 |
| MCF7 | SP1 | path:04060_32 |
| MCF7 | SP1 | path:04060_46 |
| MCF7 | SP1 | path:04110_7  |
| MCF7 | SP1 | path:04110_13 |
| MCF7 | SP1 | path:04110_4  |
| MCF7 | SP1 | path:04110_10 |
| MCF7 | SP1 | path:04110_11 |
| MCF7 | SP1 | path:04110_9  |
| MCF7 | SP1 | path:04110_5  |
| MCF7 | SP1 | path:04110_2  |
| MCF7 | SP1 | path:04110_1  |
| MCF7 | SP1 | path:04115_2  |
| MCF7 | SP1 | path:04144_2  |
| MCF7 | SP1 | path:04210_5  |
| MCF7 | SP1 | path:04210_6  |
| MCF7 | SP1 | path:04210_9  |
| MCF7 | SP1 | path:04210_4  |
| MCF7 | SP1 | path:04310_7  |
| MCF7 | SP1 | path:04310_5  |
| MCF7 | SP1 | path:04350_1  |
| MCF7 | SP1 | path:04350_5  |
| MCF7 | SP1 | path:04350_4  |
| MCF7 | SP1 | path:04510_14 |
| MCF7 | SP1 | path:04510_17 |
| MCF7 | SP1 | path:04510_10 |
| MCF7 | SP1 | path:04510_3  |
| MCF7 | SP1 | path:04510_1  |
| MCF7 | SP1 | path:04510_6  |
| MCF7 | SP1 | path:04510_5  |
| MCF7 | SP1 | path:04510_19 |
| MCF7 | SP1 | path:04510_13 |
| MCF7 | SP1 | path:04510_4  |
| MCF7 | SP1 | path:04510_16 |
| MCF7 | SP1 | path:04510_7  |
| MCF7 | SP1 | path:04510_12 |
| MCF7 | SP1 | path:04512_3  |
| MCF7 | SP1 | path:04512_1  |

|      |     |               |
|------|-----|---------------|
| MCF7 | SP1 | path:04512_2  |
| MCF7 | SP1 | path:04520_5  |
| MCF7 | SP1 | path:04520_2  |
| MCF7 | SP1 | path:04540_7  |
| MCF7 | SP1 | path:04610_6  |
| MCF7 | SP1 | path:04610_7  |
| MCF7 | SP1 | path:04610_2  |
| MCF7 | SP1 | path:04610_4  |
| MCF7 | SP1 | path:04610_5  |
| MCF7 | SP1 | path:04610_1  |
| MCF7 | SP1 | path:04610_3  |
| MCF7 | SP1 | path:04620_9  |
| MCF7 | SP1 | path:04620_6  |
| MCF7 | SP1 | path:04620_8  |
| MCF7 | SP1 | path:04620_5  |
| MCF7 | SP1 | path:04630_1  |
| MCF7 | SP1 | path:04630_2  |
| MCF7 | SP1 | path:04650_3  |
| MCF7 | SP1 | path:04660_9  |
| MCF7 | SP1 | path:04662_9  |
| MCF7 | SP1 | path:04722_15 |
| MCF7 | SP1 | path:04810_16 |
| MCF7 | SP1 | path:04912_7  |
| MCF7 | SP1 | path:04940_2  |
| MCF7 | SP1 | path:05014_2  |
| MCF7 | SP1 | path:05014_1  |
| MCF7 | SP1 | path:05020_1  |
| MCF7 | SP1 | path:05020_2  |
| MCF7 | SP1 | path:05100_6  |
| MCF7 | SP1 | path:05140_6  |
| MCF7 | SP1 | path:05140_4  |
| MCF7 | SP1 | path:05142_11 |
| MCF7 | SP1 | path:05142_3  |
| MCF7 | SP1 | path:05142_12 |
| MCF7 | SP1 | path:05145_6  |
| MCF7 | SP1 | path:05145_8  |
| MCF7 | SP1 | path:05146_1  |
| MCF7 | SP1 | path:05200_2  |
| MCF7 | SP1 | path:05200_30 |
| MCF7 | SP1 | path:05200_19 |
| MCF7 | SP1 | path:05200_21 |
| MCF7 | SP1 | path:05200_10 |
| MCF7 | SP1 | path:05200_31 |
| MCF7 | SP1 | path:05200_32 |

|      |     |               |
|------|-----|---------------|
| MCF7 | SP1 | path:05200_8  |
| MCF7 | SP1 | path:05200_39 |
| MCF7 | SP1 | path:05200_34 |
| MCF7 | SP1 | path:05200_20 |
| MCF7 | SP1 | path:05200_18 |
| MCF7 | SP1 | path:05200_14 |
| MCF7 | SP1 | path:05200_35 |
| MCF7 | SP1 | path:05200_6  |
| MCF7 | SP1 | path:05200_9  |
| MCF7 | SP1 | path:05200_29 |
| MCF7 | SP1 | path:05200_37 |
| MCF7 | SP1 | path:05200_24 |
| MCF7 | SP1 | path:05200_42 |
| MCF7 | SP1 | path:05200_1  |
| MCF7 | SP1 | path:05200_13 |
| MCF7 | SP1 | path:05200_26 |
| MCF7 | SP1 | path:05200_38 |
| MCF7 | SP1 | path:05200_25 |
| MCF7 | SP1 | path:05200_7  |
| MCF7 | SP1 | path:05200_16 |
| MCF7 | SP1 | path:05200_41 |
| MCF7 | SP1 | path:05200_15 |
| MCF7 | SP1 | path:05200_17 |
| MCF7 | SP1 | path:05200_33 |
| MCF7 | SP1 | path:05210_8  |
| MCF7 | SP1 | path:05210_5  |
| MCF7 | SP1 | path:05212_10 |
| MCF7 | SP1 | path:05212_3  |
| MCF7 | SP1 | path:05212_9  |
| MCF7 | SP1 | path:05212_8  |
| MCF7 | SP1 | path:05214_1  |
| MCF7 | SP1 | path:05214_3  |
| MCF7 | SP1 | path:05214_2  |
| MCF7 | SP1 | path:05215_9  |
| MCF7 | SP1 | path:05215_5  |
| MCF7 | SP1 | path:05215_7  |
| MCF7 | SP1 | path:05215_10 |
| MCF7 | SP1 | path:05215_6  |
| MCF7 | SP1 | path:05215_4  |
| MCF7 | SP1 | path:05216_3  |
| MCF7 | SP1 | path:05218_3  |
| MCF7 | SP1 | path:05218_1  |
| MCF7 | SP1 | path:05218_2  |
| MCF7 | SP1 | path:05218_5  |

|      |        |               |
|------|--------|---------------|
| MCF7 | SP1    | path:05218_4  |
| MCF7 | SP1    | path:05219_5  |
| MCF7 | SP1    | path:05219_3  |
| MCF7 | SP1    | path:05220_4  |
| MCF7 | SP1    | path:05220_8  |
| MCF7 | SP1    | path:05220_5  |
| MCF7 | SP1    | path:05221_2  |
| MCF7 | SP1    | path:05222_2  |
| MCF7 | SP1    | path:05222_5  |
| MCF7 | SP1    | path:05222_1  |
| MCF7 | SP1    | path:05223_1  |
| MCF7 | SP1    | path:05223_3  |
| MCF7 | SP1    | path:05320_2  |
| MCF7 | SP1    | path:05330_2  |
| MCF7 | SP1    | path:05332_1  |
| MCF7 | SP1    | path:05414_2  |
| MCF7 | STAT3  | path:04012_4  |
| MCF7 | STAT3  | path:04060_1  |
| MCF7 | STAT3  | path:04060_34 |
| MCF7 | STAT3  | path:04630_1  |
| MCF7 | STAT3  | path:04630_2  |
| MCF7 | STAT3  | path:05142_3  |
| MCF7 | STAT3  | path:05200_39 |
| MCF7 | STAT3  | path:05200_25 |
| MCF7 | STAT3  | path:05200_16 |
| MCF7 | STAT3  | path:05200_21 |
| MCF7 | STAT3  | path:05200_35 |
| MCF7 | STAT3  | path:05200_37 |
| MCF7 | STAT3  | path:05200_15 |
| MCF7 | STAT3  | path:05200_24 |
| MCF7 | STAT3  | path:05200_26 |
| MCF7 | STAT3  | path:05200_30 |
| MCF7 | STAT3  | path:05200_38 |
| MCF7 | STAT3  | path:05200_18 |
| MCF7 | STAT3  | path:05210_8  |
| MCF7 | STAT3  | path:05210_5  |
| MCF7 | STAT3  | path:05218_4  |
| MCF7 | STAT3  | path:05221_1  |
| MCF7 | TFAP2C | path:04912_7  |
| MCF7 | TFAP2C | path:05219_2  |
| MCF7 | TP53   | path:04010_11 |
| MCF7 | TP53   | path:04012_1  |
| MCF7 | TP53   | path:04012_5  |
| MCF7 | TP53   | path:04110_10 |

|      |      |               |
|------|------|---------------|
| MCF7 | TP53 | path:04110_13 |
| MCF7 | TP53 | path:04110_5  |
| MCF7 | TP53 | path:04110_2  |
| MCF7 | TP53 | path:04110_1  |
| MCF7 | TP53 | path:04110_11 |
| MCF7 | TP53 | path:04110_7  |
| MCF7 | TP53 | path:04110_6  |
| MCF7 | TP53 | path:04110_9  |
| MCF7 | TP53 | path:04115_2  |
| MCF7 | TP53 | path:04210_9  |
| MCF7 | TP53 | path:04210_8  |
| MCF7 | TP53 | path:04360_3  |
| MCF7 | TP53 | path:04510_19 |
| MCF7 | TP53 | path:04510_13 |
| MCF7 | TP53 | path:04510_12 |
| MCF7 | TP53 | path:04510_4  |
| MCF7 | TP53 | path:04510_6  |
| MCF7 | TP53 | path:04650_3  |
| MCF7 | TP53 | path:04722_15 |
| MCF7 | TP53 | path:04912_7  |
| MCF7 | TP53 | path:05014_2  |
| MCF7 | TP53 | path:05160_10 |
| MCF7 | TP53 | path:05160_9  |
| MCF7 | TP53 | path:05200_7  |
| MCF7 | TP53 | path:05200_37 |
| MCF7 | TP53 | path:05200_1  |
| MCF7 | TP53 | path:05200_2  |
| MCF7 | TP53 | path:05200_18 |
| MCF7 | TP53 | path:05200_38 |
| MCF7 | TP53 | path:05200_6  |
| MCF7 | TP53 | path:05200_19 |
| MCF7 | TP53 | path:05200_26 |
| MCF7 | TP53 | path:05200_25 |
| MCF7 | TP53 | path:05200_10 |
| MCF7 | TP53 | path:05200_39 |
| MCF7 | TP53 | path:05200_15 |
| MCF7 | TP53 | path:05200_14 |
| MCF7 | TP53 | path:05200_16 |
| MCF7 | TP53 | path:05200_17 |
| MCF7 | TP53 | path:05200_24 |
| MCF7 | TP53 | path:05200_20 |
| MCF7 | TP53 | path:05200_9  |
| MCF7 | TP53 | path:05200_13 |
| MCF7 | TP53 | path:05200_3  |

|            |      |               |
|------------|------|---------------|
| MCF7       | TP53 | path:05200_21 |
| MCF7       | TP53 | path:05200_8  |
| MCF7       | TP53 | path:05213_3  |
| MCF7       | TP53 | path:05214_1  |
| MCF7       | TP53 | path:05214_3  |
| MCF7       | TP53 | path:05214_2  |
| MCF7       | TP53 | path:05215_6  |
| MCF7       | TP53 | path:05215_4  |
| MCF7       | TP53 | path:05215_7  |
| MCF7       | TP53 | path:05215_9  |
| MCF7       | TP53 | path:05215_10 |
| MCF7       | TP53 | path:05218_2  |
| MCF7       | TP53 | path:05218_3  |
| MCF7       | TP53 | path:05218_1  |
| MCF7       | TP53 | path:05218_5  |
| MCF7       | TP53 | path:05219_5  |
| MCF7       | TP53 | path:05219_3  |
| MCF7       | TP53 | path:05220_4  |
| MCF7       | TP53 | path:05223_2  |
| MCF7       | VDR  | path:05200_10 |
| MCF7       | VDR  | path:05200_19 |
| MCF7       | VDR  | path:05200_7  |
| MCF7       | VDR  | path:05200_16 |
| MDA-MB-231 | E2F1 | path:04110_10 |
| MDA-MB-231 | E2F1 | path:04110_2  |
| MDA-MB-231 | E2F1 | path:04110_4  |
| MDA-MB-231 | E2F1 | path:04110_13 |
| MDA-MB-231 | E2F1 | path:04110_5  |
| MDA-MB-231 | E2F1 | path:04110_1  |
| MDA-MB-231 | E2F1 | path:04110_11 |
| MDA-MB-231 | E2F1 | path:04110_9  |
| MDA-MB-231 | E2F1 | path:04110_7  |
| MDA-MB-231 | E2F1 | path:04110_6  |
| MDA-MB-231 | E2F1 | path:04115_2  |
| MDA-MB-231 | E2F1 | path:04210_5  |
| MDA-MB-231 | E2F1 | path:04510_10 |
| MDA-MB-231 | E2F1 | path:05014_2  |
| MDA-MB-231 | E2F1 | path:05200_37 |
| MDA-MB-231 | E2F1 | path:05200_25 |
| MDA-MB-231 | E2F1 | path:05200_26 |
| MDA-MB-231 | E2F1 | path:05200_2  |
| MDA-MB-231 | E2F1 | path:05200_18 |
| MDA-MB-231 | E2F1 | path:05200_15 |
| MDA-MB-231 | E2F1 | path:05200_13 |

|            |       |               |
|------------|-------|---------------|
| MDA-MB-231 | E2F1  | path:05200_35 |
| MDA-MB-231 | E2F1  | path:05200_38 |
| MDA-MB-231 | E2F1  | path:05200_21 |
| MDA-MB-231 | E2F1  | path:05200_33 |
| MDA-MB-231 | E2F1  | path:05200_39 |
| MDA-MB-231 | E2F1  | path:05212_9  |
| MDA-MB-231 | E2F1  | path:05214_3  |
| MDA-MB-231 | E2F1  | path:05215_3  |
| MDA-MB-231 | E2F1  | path:05218_5  |
| MDA-MB-231 | E2F1  | path:05218_3  |
| MDA-MB-231 | E2F1  | path:05219_5  |
| MDA-MB-231 | E2F1  | path:05219_3  |
| MDA-MB-231 | E2F1  | path:05220_4  |
| MDA-MB-231 | E2F1  | path:05222_1  |
| MDA-MB-231 | E2F1  | path:05222_5  |
| MDA-MB-231 | E2F1  | path:05223_3  |
| MDA-MB-231 | E2F1  | path:05223_4  |
| MDA-MB-231 | STAT3 | path:04012_4  |
| MDA-MB-231 | STAT3 | path:04060_1  |
| MDA-MB-231 | STAT3 | path:04060_34 |
| MDA-MB-231 | STAT3 | path:04630_1  |
| MDA-MB-231 | STAT3 | path:04630_2  |
| MDA-MB-231 | STAT3 | path:05142_3  |
| MDA-MB-231 | STAT3 | path:05200_16 |
| MDA-MB-231 | STAT3 | path:05200_21 |
| MDA-MB-231 | STAT3 | path:05200_25 |
| MDA-MB-231 | STAT3 | path:05200_37 |
| MDA-MB-231 | STAT3 | path:05200_15 |
| MDA-MB-231 | STAT3 | path:05200_24 |
| MDA-MB-231 | STAT3 | path:05200_38 |
| MDA-MB-231 | STAT3 | path:05200_39 |
| MDA-MB-231 | STAT3 | path:05200_18 |
| MDA-MB-231 | STAT3 | path:05200_26 |
| MDA-MB-231 | STAT3 | path:05200_30 |
| MDA-MB-231 | STAT3 | path:05200_35 |
| MDA-MB-231 | STAT3 | path:05210_8  |
| MDA-MB-231 | STAT3 | path:05210_5  |
| MDA-MB-231 | STAT3 | path:05218_4  |
| MDA-MB-231 | STAT3 | path:05221_1  |
| MDA-MB-346 | SP1   | path:00140_1  |
| MDA-MB-346 | SP1   | path:00330_1  |
| MDA-MB-346 | SP1   | path:00330_5  |
| MDA-MB-346 | SP1   | path:00330_4  |
| MDA-MB-346 | SP1   | path:00330_3  |

|            |     |               |
|------------|-----|---------------|
| MDA-MB-346 | SP1 | path:00350_2  |
| MDA-MB-346 | SP1 | path:00590_2  |
| MDA-MB-346 | SP1 | path:00980_1  |
| MDA-MB-346 | SP1 | path:04010_6  |
| MDA-MB-346 | SP1 | path:04010_8  |
| MDA-MB-346 | SP1 | path:04010_7  |
| MDA-MB-346 | SP1 | path:04060_19 |
| MDA-MB-346 | SP1 | path:04060_32 |
| MDA-MB-346 | SP1 | path:04060_10 |
| MDA-MB-346 | SP1 | path:04060_20 |
| MDA-MB-346 | SP1 | path:04060_46 |
| MDA-MB-346 | SP1 | path:04110_7  |
| MDA-MB-346 | SP1 | path:04110_13 |
| MDA-MB-346 | SP1 | path:04110_4  |
| MDA-MB-346 | SP1 | path:04110_5  |
| MDA-MB-346 | SP1 | path:04110_11 |
| MDA-MB-346 | SP1 | path:04110_10 |
| MDA-MB-346 | SP1 | path:04110_2  |
| MDA-MB-346 | SP1 | path:04110_9  |
| MDA-MB-346 | SP1 | path:04110_1  |
| MDA-MB-346 | SP1 | path:04115_2  |
| MDA-MB-346 | SP1 | path:04144_2  |
| MDA-MB-346 | SP1 | path:04210_5  |
| MDA-MB-346 | SP1 | path:04210_4  |
| MDA-MB-346 | SP1 | path:04210_6  |
| MDA-MB-346 | SP1 | path:04210_9  |
| MDA-MB-346 | SP1 | path:04310_5  |
| MDA-MB-346 | SP1 | path:04310_7  |
| MDA-MB-346 | SP1 | path:04350_5  |
| MDA-MB-346 | SP1 | path:04350_1  |
| MDA-MB-346 | SP1 | path:04350_4  |
| MDA-MB-346 | SP1 | path:04510_4  |
| MDA-MB-346 | SP1 | path:04510_6  |
| MDA-MB-346 | SP1 | path:04510_14 |
| MDA-MB-346 | SP1 | path:04510_19 |
| MDA-MB-346 | SP1 | path:04510_3  |
| MDA-MB-346 | SP1 | path:04510_10 |
| MDA-MB-346 | SP1 | path:04510_16 |
| MDA-MB-346 | SP1 | path:04510_5  |
| MDA-MB-346 | SP1 | path:04510_1  |
| MDA-MB-346 | SP1 | path:04510_12 |
| MDA-MB-346 | SP1 | path:04510_7  |
| MDA-MB-346 | SP1 | path:04510_17 |
| MDA-MB-346 | SP1 | path:04510_13 |



|            |     |               |
|------------|-----|---------------|
| MDA-MB-346 | SP1 | path:04512_3  |
| MDA-MB-346 | SP1 | path:04512_2  |
| MDA-MB-346 | SP1 | path:04512_1  |
| MDA-MB-346 | SP1 | path:04520_2  |
| MDA-MB-346 | SP1 | path:04520_5  |
| MDA-MB-346 | SP1 | path:04540_7  |
| MDA-MB-346 | SP1 | path:04610_5  |
| MDA-MB-346 | SP1 | path:04610_6  |
| MDA-MB-346 | SP1 | path:04610_1  |
| MDA-MB-346 | SP1 | path:04610_7  |
| MDA-MB-346 | SP1 | path:04610_2  |
| MDA-MB-346 | SP1 | path:04610_4  |
| MDA-MB-346 | SP1 | path:04610_3  |
| MDA-MB-346 | SP1 | path:04620_9  |
| MDA-MB-346 | SP1 | path:04620_8  |
| MDA-MB-346 | SP1 | path:04620_6  |
| MDA-MB-346 | SP1 | path:04620_5  |
| MDA-MB-346 | SP1 | path:04630_1  |
| MDA-MB-346 | SP1 | path:04630_2  |
| MDA-MB-346 | SP1 | path:04650_3  |
| MDA-MB-346 | SP1 | path:04660_9  |
| MDA-MB-346 | SP1 | path:04662_9  |
| MDA-MB-346 | SP1 | path:04722_15 |
| MDA-MB-346 | SP1 | path:04810_16 |
| MDA-MB-346 | SP1 | path:04912_7  |
| MDA-MB-346 | SP1 | path:04940_2  |
| MDA-MB-346 | SP1 | path:05014_2  |
| MDA-MB-346 | SP1 | path:05014_1  |
| MDA-MB-346 | SP1 | path:05020_2  |
| MDA-MB-346 | SP1 | path:05020_1  |
| MDA-MB-346 | SP1 | path:05100_6  |
| MDA-MB-346 | SP1 | path:05140_6  |
| MDA-MB-346 | SP1 | path:05140_4  |
| MDA-MB-346 | SP1 | path:05142_11 |
| MDA-MB-346 | SP1 | path:05142_12 |
| MDA-MB-346 | SP1 | path:05142_3  |
| MDA-MB-346 | SP1 | path:05145_8  |
| MDA-MB-346 | SP1 | path:05145_6  |
| MDA-MB-346 | SP1 | path:05146_1  |
| MDA-MB-346 | SP1 | path:05200_7  |
| MDA-MB-346 | SP1 | path:05200_2  |
| MDA-MB-346 | SP1 | path:05200_21 |
| MDA-MB-346 | SP1 | path:05200_10 |
| MDA-MB-346 | SP1 | path:05200_31 |

|            |     |               |
|------------|-----|---------------|
| MDA-MB-346 | SP1 | path:05200_19 |
| MDA-MB-346 | SP1 | path:05200_39 |
| MDA-MB-346 | SP1 | path:05200_1  |
| MDA-MB-346 | SP1 | path:05200_35 |
| MDA-MB-346 | SP1 | path:05200_6  |
| MDA-MB-346 | SP1 | path:05200_38 |
| MDA-MB-346 | SP1 | path:05200_8  |
| MDA-MB-346 | SP1 | path:05200_9  |
| MDA-MB-346 | SP1 | path:05200_37 |
| MDA-MB-346 | SP1 | path:05200_24 |
| MDA-MB-346 | SP1 | path:05200_32 |
| MDA-MB-346 | SP1 | path:05200_42 |
| MDA-MB-346 | SP1 | path:05200_34 |
| MDA-MB-346 | SP1 | path:05200_20 |
| MDA-MB-346 | SP1 | path:05200_18 |
| MDA-MB-346 | SP1 | path:05200_16 |
| MDA-MB-346 | SP1 | path:05200_25 |
| MDA-MB-346 | SP1 | path:05200_13 |
| MDA-MB-346 | SP1 | path:05200_41 |
| MDA-MB-346 | SP1 | path:05200_29 |
| MDA-MB-346 | SP1 | path:05200_14 |
| MDA-MB-346 | SP1 | path:05200_15 |
| MDA-MB-346 | SP1 | path:05200_26 |
| MDA-MB-346 | SP1 | path:05200_17 |
| MDA-MB-346 | SP1 | path:05200_30 |
| MDA-MB-346 | SP1 | path:05200_33 |
| MDA-MB-346 | SP1 | path:05210_8  |
| MDA-MB-346 | SP1 | path:05210_5  |
| MDA-MB-346 | SP1 | path:05212_3  |
| MDA-MB-346 | SP1 | path:05212_10 |
| MDA-MB-346 | SP1 | path:05212_8  |
| MDA-MB-346 | SP1 | path:05212_9  |
| MDA-MB-346 | SP1 | path:05214_1  |
| MDA-MB-346 | SP1 | path:05214_3  |
| MDA-MB-346 | SP1 | path:05214_2  |
| MDA-MB-346 | SP1 | path:05215_9  |
| MDA-MB-346 | SP1 | path:05215_10 |
| MDA-MB-346 | SP1 | path:05215_5  |
| MDA-MB-346 | SP1 | path:05215_7  |
| MDA-MB-346 | SP1 | path:05215_6  |
| MDA-MB-346 | SP1 | path:05215_4  |
| MDA-MB-346 | SP1 | path:05216_3  |
| MDA-MB-346 | SP1 | path:05218_3  |
| MDA-MB-346 | SP1 | path:05218_1  |

|            |       |               |
|------------|-------|---------------|
| MDA-MB-346 | SP1   | path:05218_2  |
| MDA-MB-346 | SP1   | path:05218_4  |
| MDA-MB-346 | SP1   | path:05218_5  |
| MDA-MB-346 | SP1   | path:05219_5  |
| MDA-MB-346 | SP1   | path:05219_3  |
| MDA-MB-346 | SP1   | path:05220_4  |
| MDA-MB-346 | SP1   | path:05220_8  |
| MDA-MB-346 | SP1   | path:05220_5  |
| MDA-MB-346 | SP1   | path:05221_2  |
| MDA-MB-346 | SP1   | path:05222_5  |
| MDA-MB-346 | SP1   | path:05222_2  |
| MDA-MB-346 | SP1   | path:05222_1  |
| MDA-MB-346 | SP1   | path:05223_3  |
| MDA-MB-346 | SP1   | path:05223_1  |
| MDA-MB-346 | SP1   | path:05320_2  |
| MDA-MB-346 | SP1   | path:05330_2  |
| MDA-MB-346 | SP1   | path:05332_1  |
| MDA-MB-346 | SP1   | path:05414_2  |
| MDA-MB-361 | STAT3 | path:04012_4  |
| MDA-MB-361 | STAT3 | path:04060_1  |
| MDA-MB-361 | STAT3 | path:04060_34 |
| MDA-MB-361 | STAT3 | path:04630_1  |
| MDA-MB-361 | STAT3 | path:04630_2  |
| MDA-MB-361 | STAT3 | path:05142_3  |
| MDA-MB-361 | STAT3 | path:05200_39 |
| MDA-MB-361 | STAT3 | path:05200_35 |
| MDA-MB-361 | STAT3 | path:05200_21 |
| MDA-MB-361 | STAT3 | path:05200_30 |
| MDA-MB-361 | STAT3 | path:05200_25 |
| MDA-MB-361 | STAT3 | path:05200_15 |
| MDA-MB-361 | STAT3 | path:05200_16 |
| MDA-MB-361 | STAT3 | path:05200_26 |
| MDA-MB-361 | STAT3 | path:05200_37 |
| MDA-MB-361 | STAT3 | path:05200_24 |
| MDA-MB-361 | STAT3 | path:05200_18 |
| MDA-MB-361 | STAT3 | path:05200_38 |
| MDA-MB-361 | STAT3 | path:05210_8  |
| MDA-MB-361 | STAT3 | path:05210_5  |
| MDA-MB-361 | STAT3 | path:05218_4  |
| MDA-MB-361 | STAT3 | path:05221_1  |
| MDA-MB-435 | STAT3 | path:04012_4  |
| MDA-MB-435 | STAT3 | path:04060_34 |
| MDA-MB-435 | STAT3 | path:04060_1  |
| MDA-MB-435 | STAT3 | path:04630_1  |

|            |       |               |
|------------|-------|---------------|
| MDA-MB-435 | STAT3 | path:04630_2  |
| MDA-MB-435 | STAT3 | path:05142_3  |
| MDA-MB-435 | STAT3 | path:05200_16 |
| MDA-MB-435 | STAT3 | path:05200_21 |
| MDA-MB-435 | STAT3 | path:05200_24 |
| MDA-MB-435 | STAT3 | path:05200_25 |
| MDA-MB-435 | STAT3 | path:05200_37 |
| MDA-MB-435 | STAT3 | path:05200_15 |
| MDA-MB-435 | STAT3 | path:05200_35 |
| MDA-MB-435 | STAT3 | path:05200_18 |
| MDA-MB-435 | STAT3 | path:05200_26 |
| MDA-MB-435 | STAT3 | path:05200_38 |
| MDA-MB-435 | STAT3 | path:05200_30 |
| MDA-MB-435 | STAT3 | path:05200_39 |
| MDA-MB-435 | STAT3 | path:05210_8  |
| MDA-MB-435 | STAT3 | path:05210_5  |
| MDA-MB-435 | STAT3 | path:05218_4  |
| MDA-MB-435 | STAT3 | path:05221_1  |
| MDA-MB-453 | STAT3 | path:04012_4  |
| MDA-MB-453 | STAT3 | path:04060_34 |
| MDA-MB-453 | STAT3 | path:04060_1  |
| MDA-MB-453 | STAT3 | path:04630_2  |
| MDA-MB-453 | STAT3 | path:04630_1  |
| MDA-MB-453 | STAT3 | path:05142_3  |
| MDA-MB-453 | STAT3 | path:05200_18 |
| MDA-MB-453 | STAT3 | path:05200_24 |
| MDA-MB-453 | STAT3 | path:05200_16 |
| MDA-MB-453 | STAT3 | path:05200_21 |
| MDA-MB-453 | STAT3 | path:05200_25 |
| MDA-MB-453 | STAT3 | path:05200_37 |
| MDA-MB-453 | STAT3 | path:05200_15 |
| MDA-MB-453 | STAT3 | path:05200_38 |
| MDA-MB-453 | STAT3 | path:05200_30 |
| MDA-MB-453 | STAT3 | path:05200_26 |
| MDA-MB-453 | STAT3 | path:05200_35 |
| MDA-MB-453 | STAT3 | path:05200_39 |
| MDA-MB-453 | STAT3 | path:05210_8  |
| MDA-MB-453 | STAT3 | path:05210_5  |
| MDA-MB-453 | STAT3 | path:05218_4  |
| MDA-MB-453 | STAT3 | path:05221_1  |
| MDA-MB-468 | E2F1  | path:04110_2  |
| MDA-MB-468 | E2F1  | path:04110_10 |
| MDA-MB-468 | E2F1  | path:04110_4  |
| MDA-MB-468 | E2F1  | path:04110_13 |

|            |       |               |
|------------|-------|---------------|
| MDA-MB-468 | E2F1  | path:04110_1  |
| MDA-MB-468 | E2F1  | path:04110_9  |
| MDA-MB-468 | E2F1  | path:04110_5  |
| MDA-MB-468 | E2F1  | path:04110_7  |
| MDA-MB-468 | E2F1  | path:04110_11 |
| MDA-MB-468 | E2F1  | path:04110_6  |
| MDA-MB-468 | E2F1  | path:04115_2  |
| MDA-MB-468 | E2F1  | path:04210_5  |
| MDA-MB-468 | E2F1  | path:04510_10 |
| MDA-MB-468 | E2F1  | path:05014_2  |
| MDA-MB-468 | E2F1  | path:05200_37 |
| MDA-MB-468 | E2F1  | path:05200_25 |
| MDA-MB-468 | E2F1  | path:05200_26 |
| MDA-MB-468 | E2F1  | path:05200_2  |
| MDA-MB-468 | E2F1  | path:05200_15 |
| MDA-MB-468 | E2F1  | path:05200_18 |
| MDA-MB-468 | E2F1  | path:05200_33 |
| MDA-MB-468 | E2F1  | path:05200_35 |
| MDA-MB-468 | E2F1  | path:05200_21 |
| MDA-MB-468 | E2F1  | path:05200_13 |
| MDA-MB-468 | E2F1  | path:05200_38 |
| MDA-MB-468 | E2F1  | path:05200_39 |
| MDA-MB-468 | E2F1  | path:05212_9  |
| MDA-MB-468 | E2F1  | path:05214_3  |
| MDA-MB-468 | E2F1  | path:05215_3  |
| MDA-MB-468 | E2F1  | path:05218_5  |
| MDA-MB-468 | E2F1  | path:05218_3  |
| MDA-MB-468 | E2F1  | path:05219_5  |
| MDA-MB-468 | E2F1  | path:05219_3  |
| MDA-MB-468 | E2F1  | path:05220_4  |
| MDA-MB-468 | E2F1  | path:05222_1  |
| MDA-MB-468 | E2F1  | path:05222_5  |
| MDA-MB-468 | E2F1  | path:05223_3  |
| MDA-MB-468 | E2F1  | path:05223_4  |
| MDA-MB-468 | STAT3 | path:04012_4  |
| MDA-MB-468 | STAT3 | path:04060_1  |
| MDA-MB-468 | STAT3 | path:04060_34 |
| MDA-MB-468 | STAT3 | path:04630_2  |
| MDA-MB-468 | STAT3 | path:04630_1  |
| MDA-MB-468 | STAT3 | path:05142_3  |
| MDA-MB-468 | STAT3 | path:05200_30 |
| MDA-MB-468 | STAT3 | path:05200_35 |
| MDA-MB-468 | STAT3 | path:05200_39 |
| MDA-MB-468 | STAT3 | path:05200_25 |

|            |        |               |
|------------|--------|---------------|
| MDA-MB-468 | STAT3  | path:05200_15 |
| MDA-MB-468 | STAT3  | path:05200_21 |
| MDA-MB-468 | STAT3  | path:05200_37 |
| MDA-MB-468 | STAT3  | path:05200_24 |
| MDA-MB-468 | STAT3  | path:05200_16 |
| MDA-MB-468 | STAT3  | path:05200_26 |
| MDA-MB-468 | STAT3  | path:05200_18 |
| MDA-MB-468 | STAT3  | path:05200_38 |
| MDA-MB-468 | STAT3  | path:05210_5  |
| MDA-MB-468 | STAT3  | path:05210_8  |
| MDA-MB-468 | STAT3  | path:05218_4  |
| MDA-MB-468 | STAT3  | path:05221_1  |
| melanoma   | GLI1   | path:04510_10 |
| melanoma   | GLI1   | path:04510_8  |
| muscle     | FOXO3  | path:04920_2  |
| muscle     | NR1I3  | path:00830_1  |
| muscle     | NR1I3  | path:00980_1  |
| muscle     | NR1I3  | path:00982_2  |
| muscle     | NR4A1  | path:00140_1  |
| muscle     | SREBF1 | path:04910_1  |
| muscle     | SREBF1 | path:04910_4  |
| myoblasts  | MYOD1  | path:05200_39 |
| myoblasts  | MYOD1  | path:05200_25 |
| myoblasts  | MYOD1  | path:05200_15 |
| myoblasts  | MYOD1  | path:05200_24 |
| myoblasts  | MYOD1  | path:05200_38 |
| myoblasts  | MYOD1  | path:05200_18 |
| NBE        | E2F1   | path:04110_2  |
| NBE        | E2F1   | path:04110_4  |
| NBE        | E2F1   | path:04110_13 |
| NBE        | E2F1   | path:04110_10 |
| NBE        | E2F1   | path:04110_1  |
| NBE        | E2F1   | path:04110_5  |
| NBE        | E2F1   | path:04110_7  |
| NBE        | E2F1   | path:04110_9  |
| NBE        | E2F1   | path:04110_11 |
| NBE        | E2F1   | path:04110_6  |
| NBE        | E2F1   | path:04115_2  |
| NBE        | E2F1   | path:04210_5  |
| NBE        | E2F1   | path:04510_10 |
| NBE        | E2F1   | path:05014_2  |
| NBE        | E2F1   | path:05200_25 |
| NBE        | E2F1   | path:05200_37 |
| NBE        | E2F1   | path:05200_26 |

|               |       |               |
|---------------|-------|---------------|
| NBE           | E2F1  | path:05200_39 |
| NBE           | E2F1  | path:05200_15 |
| NBE           | E2F1  | path:05200_2  |
| NBE           | E2F1  | path:05200_33 |
| NBE           | E2F1  | path:05200_35 |
| NBE           | E2F1  | path:05200_38 |
| NBE           | E2F1  | path:05200_13 |
| NBE           | E2F1  | path:05200_18 |
| NBE           | E2F1  | path:05200_21 |
| NBE           | E2F1  | path:05212_9  |
| NBE           | E2F1  | path:05214_3  |
| NBE           | E2F1  | path:05215_3  |
| NBE           | E2F1  | path:05218_5  |
| NBE           | E2F1  | path:05218_3  |
| NBE           | E2F1  | path:05219_3  |
| NBE           | E2F1  | path:05219_5  |
| NBE           | E2F1  | path:05220_4  |
| NBE           | E2F1  | path:05222_1  |
| NBE           | E2F1  | path:05222_5  |
| NBE           | E2F1  | path:05223_4  |
| NBE           | E2F1  | path:05223_3  |
| neuroblastoma | GATA3 | path:04612_4  |
| neuroblastoma | HIF1A | path:05200_25 |
| neuroblastoma | HIF1A | path:05200_39 |
| neuroblastoma | HIF1A | path:05200_37 |
| neuroblastoma | TP73  | path:04115_2  |
| neuroblastoma | TP73  | path:04722_15 |
| neuroblastoma | TP73  | path:05200_33 |
| nucleus       | TCF7  | path:04660_15 |
| ovary         | AKNA  | path:04060_18 |
| ovary         | AKNA  | path:04514_8  |
| ovary         | AKNA  | path:04672_2  |
| ovary         | AKNA  | path:05144_4  |
| ovary         | AKNA  | path:05145_14 |
| ovary         | AKNA  | path:05310_1  |
| ovary         | AKNA  | path:05320_1  |
| ovary         | AKNA  | path:05322_3  |
| ovary         | AKNA  | path:05330_1  |
| ovary         | AKNA  | path:05416_3  |
| ovary         | FLI1  | path:04512_3  |
| ovary         | FLI1  | path:04512_1  |
| ovary         | FOXO3 | path:04920_2  |
| pancreas      | ELF1  | path:00920_1  |
| pancreas      | ELF1  | path:04060_34 |

|                  |       |               |
|------------------|-------|---------------|
| pancreas         | ELF1  | path:04060_1  |
| pancreas         | ELF1  | path:04650_2  |
| pancreas         | ELF1  | path:04650_8  |
| pancreas         | ELF1  | path:04650_10 |
| pancreas         | ELF1  | path:04650_9  |
| pancreas         | ELF1  | path:04650_4  |
| pancreas         | ELF1  | path:04664_1  |
| pancreas         | ELF1  | path:04664_6  |
| pancreas         | ELF1  | path:04664_2  |
| pancreas         | FOXA3 | path:00140_1  |
| pancreas         | FOXA3 | path:00591_1  |
| pancreas         | FOXA3 | path:00830_1  |
| pancreas         | FOXA3 | path:00980_1  |
| pancreas         | FOXA3 | path:00982_2  |
| pancreas         | FOXO3 | path:04920_2  |
| pancreas         | HNF4A | path:00010_1  |
| pancreas         | HNF4A | path:00120_1  |
| pancreas         | HNF4A | path:00140_1  |
| pancreas         | HNF4A | path:00561_2  |
| pancreas         | HNF4A | path:00590_1  |
| pancreas         | HNF4A | path:00590_2  |
| pancreas         | HNF4A | path:00591_1  |
| pancreas         | HNF4A | path:00830_1  |
| pancreas         | HNF4A | path:00980_1  |
| pancreas         | HNF4A | path:00982_2  |
| pancreas         | HNF4A | path:03320_1  |
| pancreas         | HNF4A | path:04610_2  |
| pancreas         | HNF4A | path:04610_6  |
| pancreas         | HNF4A | path:04610_5  |
| pancreas         | HNF4A | path:04610_1  |
| pancreas         | HNF4A | path:04610_3  |
| pancreas         | HNF4A | path:04610_7  |
| pancreas         | HNF4A | path:04610_4  |
| pancreas         | HNF4A | path:04950_2  |
| pancreas         | HNF4A | path:04950_3  |
| peripheral blood | AKNA  | path:04060_18 |
| peripheral blood | AKNA  | path:04514_8  |
| peripheral blood | AKNA  | path:04672_2  |
| peripheral blood | AKNA  | path:05144_4  |
| peripheral blood | AKNA  | path:05145_14 |
| peripheral blood | AKNA  | path:05310_1  |
| peripheral blood | AKNA  | path:05320_1  |
| peripheral blood | AKNA  | path:05322_3  |
| peripheral blood | AKNA  | path:05330_1  |



|                  |        |               |
|------------------|--------|---------------|
| peripheral blood | AKNA   | path:05416_3  |
| peripheral blood | IRF5   | path:04060_23 |
| peripheral blood | IRF5   | path:04620_1  |
| peripheral blood | IRF5   | path:04620_3  |
| peripheral blood | IRF5   | path:04620_2  |
| peripheral blood | IRF5   | path:04620_4  |
| peripheral blood | IRF5   | path:04620_7  |
| peripheral blood | IRF5   | path:04650_5  |
| peripheral blood | IRF5   | path:04650_3  |
| peripheral blood | IRF5   | path:05160_4  |
| peripheral blood | IRF7   | path:04060_23 |
| peripheral blood | IRF7   | path:04620_4  |
| peripheral blood | IRF7   | path:04620_8  |
| peripheral blood | IRF7   | path:04620_7  |
| peripheral blood | IRF7   | path:04620_6  |
| peripheral blood | IRF7   | path:04620_2  |
| peripheral blood | IRF7   | path:04620_9  |
| peripheral blood | IRF7   | path:04620_1  |
| peripheral blood | IRF7   | path:04620_3  |
| peripheral blood | IRF7   | path:04620_5  |
| peripheral blood | IRF7   | path:04650_5  |
| peripheral blood | IRF7   | path:04650_3  |
| peripheral blood | IRF7   | path:05160_4  |
| pituitary        | NR5A1  | path:00140_1  |
| pituitary        | NR5A1  | path:04060_2  |
| pituitary        | NR5A1  | path:04350_6  |
| placenta         | FOXO3  | path:04920_2  |
| placenta         | HIF1A  | path:05200_25 |
| placenta         | HIF1A  | path:05200_39 |
| placenta         | HIF1A  | path:05200_37 |
| placenta         | KLF5   | path:05200_35 |
| placenta         | KLF5   | path:05200_25 |
| placenta         | KLF5   | path:05200_37 |
| placenta         | KLF5   | path:05200_21 |
| placenta         | KLF5   | path:05210_5  |
| placenta         | KLF5   | path:05210_8  |
| placenta         | SREBF1 | path:04910_4  |
| placenta         | SREBF1 | path:04910_1  |
| placenta         | TP63   | path:04110_10 |
| placenta         | TP63   | path:04110_11 |
| placenta         | TP63   | path:04110_5  |
| placenta         | TP63   | path:04110_1  |
| placenta         | TP63   | path:04110_7  |
| placenta         | TP63   | path:04110_2  |

|          |      |               |
|----------|------|---------------|
| placenta | TP63 | path:04110_9  |
| placenta | TP63 | path:04115_2  |
| placenta | TP63 | path:05200_15 |
| placenta | TP63 | path:05200_21 |
| placenta | TP63 | path:05200_7  |
| placenta | TP63 | path:05200_2  |
| placenta | TP63 | path:05200_39 |
| placenta | TP63 | path:05200_25 |
| placenta | TP63 | path:05200_9  |
| placenta | TP63 | path:05200_13 |
| placenta | TP63 | path:05200_14 |
| placenta | TP63 | path:05200_3  |
| placenta | TP63 | path:05200_1  |
| placenta | TP63 | path:05200_19 |
| placenta | TP63 | path:05200_20 |
| placenta | TP63 | path:05200_37 |
| placenta | TP63 | path:05214_3  |
| placenta | TP63 | path:05215_4  |
| placenta | TP63 | path:05215_10 |
| placenta | TP63 | path:05215_9  |
| placenta | TP63 | path:05215_6  |
| placenta | TP63 | path:05218_3  |
| placenta | TP63 | path:05218_5  |
| placenta | TP63 | path:05219_5  |
| placenta | TP63 | path:05219_3  |
| placenta | TP63 | path:05220_4  |
| PMA      | EGR1 | path:04144_2  |
| PMA      | EGR1 | path:04350_5  |
| PMA      | EGR1 | path:04350_1  |
| PMA      | EGR1 | path:04510_7  |
| PMA      | EGR1 | path:04510_13 |
| PMA      | EGR1 | path:04510_12 |
| PMA      | EGR1 | path:04510_5  |
| PMA      | EGR1 | path:04510_6  |
| PMA      | EGR1 | path:04512_3  |
| PMA      | EGR1 | path:04512_2  |
| PMA      | EGR1 | path:04512_1  |
| PMA      | EGR1 | path:05020_2  |
| PMA      | EGR1 | path:05200_16 |
| PMA      | EGR1 | path:05200_24 |
| PMA      | EGR1 | path:05200_35 |
| PMA      | EGR1 | path:05200_29 |
| PMA      | EGR1 | path:05200_31 |
| PMA      | EGR1 | path:05200_30 |

|     |      |               |
|-----|------|---------------|
| PMA | EGR1 | path:05200_25 |
| PMA | EGR1 | path:05200_37 |
| PMA | EGR1 | path:05212_3  |
| PMA | EGR1 | path:05212_8  |
| PMA | EGR1 | path:05215_7  |
| PMA | EGR1 | path:05215_9  |
| PMA | EGR1 | path:05218_4  |
| PMA | FOS  | path:04115_2  |
| PMA | FOS  | path:04310_7  |
| PMA | FOS  | path:04610_6  |
| PMA | FOS  | path:04610_7  |
| PMA | FOS  | path:04620_6  |
| PMA | FOS  | path:04620_9  |
| PMA | FOS  | path:04620_8  |
| PMA | FOS  | path:04620_5  |
| PMA | FOS  | path:04670_2  |
| PMA | FOS  | path:05200_24 |
| PMA | FOS  | path:05200_38 |
| PMA | FOS  | path:05200_39 |
| PMA | FOS  | path:05200_37 |
| PMA | FOS  | path:05200_25 |
| PMA | FOS  | path:05200_35 |
| PMA | FOS  | path:05219_3  |
| PMA | RELA | path:04060_44 |
| PMA | RELA | path:04060_35 |
| PMA | RELA | path:04062_1  |
| PMA | RELA | path:04062_2  |
| PMA | RELA | path:04110_10 |
| PMA | RELA | path:04110_2  |
| PMA | RELA | path:04110_1  |
| PMA | RELA | path:04110_9  |
| PMA | RELA | path:04110_7  |
| PMA | RELA | path:04110_11 |
| PMA | RELA | path:04110_5  |
| PMA | RELA | path:04115_2  |
| PMA | RELA | path:04612_5  |
| PMA | RELA | path:04620_5  |
| PMA | RELA | path:04620_8  |
| PMA | RELA | path:04620_1  |
| PMA | RELA | path:04620_9  |
| PMA | RELA | path:04620_4  |
| PMA | RELA | path:04620_3  |
| PMA | RELA | path:04620_7  |
| PMA | RELA | path:04620_6  |

|          |       |               |
|----------|-------|---------------|
| PMA      | RELA  | path:04650_13 |
| PMA      | RELA  | path:04650_3  |
| PMA      | RELA  | path:04650_5  |
| PMA      | RELA  | path:04650_14 |
| PMA      | RELA  | path:04650_15 |
| PMA      | RELA  | path:04670_8  |
| PMA      | RELA  | path:04670_6  |
| PMA      | RELA  | path:04670_4  |
| PMA      | RELA  | path:04670_9  |
| PMA      | RELA  | path:04670_2  |
| PMA      | RELA  | path:05142_3  |
| PMA      | RELA  | path:05200_35 |
| PMA      | RELA  | path:05200_39 |
| PMA      | RELA  | path:05200_37 |
| PMA      | RELA  | path:05200_15 |
| PMA      | RELA  | path:05200_25 |
| PMA      | RELA  | path:05200_13 |
| PMA      | RELA  | path:05200_2  |
| PMA      | RELA  | path:05200_21 |
| PMA      | RELA  | path:05200_38 |
| PMA      | RELA  | path:05219_3  |
| prostate | HNF1A | path:00140_1  |
| prostate | HNF1A | path:00980_1  |
| prostate | HNF1A | path:00982_2  |
| prostate | HNF1A | path:04610_2  |
| prostate | HNF1A | path:04610_3  |
| prostate | HNF1A | path:04610_4  |
| prostate | HNF1A | path:04610_6  |
| prostate | HNF1A | path:04950_3  |
| prostate | TP63  | path:04110_10 |
| prostate | TP63  | path:04110_11 |
| prostate | TP63  | path:04110_5  |
| prostate | TP63  | path:04110_2  |
| prostate | TP63  | path:04110_1  |
| prostate | TP63  | path:04110_7  |
| prostate | TP63  | path:04110_9  |
| prostate | TP63  | path:04115_2  |
| prostate | TP63  | path:05200_15 |
| prostate | TP63  | path:05200_2  |
| prostate | TP63  | path:05200_21 |
| prostate | TP63  | path:05200_39 |
| prostate | TP63  | path:05200_7  |
| prostate | TP63  | path:05200_14 |
| prostate | TP63  | path:05200_9  |

|                |      |               |
|----------------|------|---------------|
| prostate       | TP63 | path:05200_37 |
| prostate       | TP63 | path:05200_20 |
| prostate       | TP63 | path:05200_3  |
| prostate       | TP63 | path:05200_1  |
| prostate       | TP63 | path:05200_13 |
| prostate       | TP63 | path:05200_19 |
| prostate       | TP63 | path:05200_25 |
| prostate       | TP63 | path:05214_3  |
| prostate       | TP63 | path:05215_4  |
| prostate       | TP63 | path:05215_10 |
| prostate       | TP63 | path:05215_9  |
| prostate       | TP63 | path:05215_6  |
| prostate       | TP63 | path:05218_3  |
| prostate       | TP63 | path:05218_5  |
| prostate       | TP63 | path:05219_5  |
| prostate       | TP63 | path:05219_3  |
| prostate       | TP63 | path:05220_4  |
| retina         | NRL  | path:04744_2  |
| salivary gland | TP63 | path:04110_11 |
| salivary gland | TP63 | path:04110_10 |
| salivary gland | TP63 | path:04110_7  |
| salivary gland | TP63 | path:04110_5  |
| salivary gland | TP63 | path:04110_2  |
| salivary gland | TP63 | path:04110_1  |
| salivary gland | TP63 | path:04110_9  |
| salivary gland | TP63 | path:04115_2  |
| salivary gland | TP63 | path:05200_21 |
| salivary gland | TP63 | path:05200_15 |
| salivary gland | TP63 | path:05200_9  |
| salivary gland | TP63 | path:05200_39 |
| salivary gland | TP63 | path:05200_7  |
| salivary gland | TP63 | path:05200_25 |
| salivary gland | TP63 | path:05200_2  |
| salivary gland | TP63 | path:05200_14 |
| salivary gland | TP63 | path:05200_3  |
| salivary gland | TP63 | path:05200_13 |
| salivary gland | TP63 | path:05200_1  |
| salivary gland | TP63 | path:05200_20 |
| salivary gland | TP63 | path:05200_19 |
| salivary gland | TP63 | path:05200_37 |
| salivary gland | TP63 | path:05214_3  |
| salivary gland | TP63 | path:05215_4  |
| salivary gland | TP63 | path:05215_6  |
| salivary gland | TP63 | path:05215_10 |

|                |       |               |
|----------------|-------|---------------|
| salivary gland | TP63  | path:05215_9  |
| salivary gland | TP63  | path:05218_5  |
| salivary gland | TP63  | path:05218_3  |
| salivary gland | TP63  | path:05219_5  |
| salivary gland | TP63  | path:05219_3  |
| salivary gland | TP63  | path:05220_4  |
| Saos           | ELK1  | path:04010_4  |
| Saos           | ELK1  | path:04010_11 |
| Saos           | ELK1  | path:05020_3  |
| Saos           | ELK1  | path:05020_4  |
| Saos           | ELK1  | path:05110_3  |
| Saos           | ELK1  | path:05200_18 |
| Saos           | ELK1  | path:05200_26 |
| Saos           | MYOD1 | path:05200_25 |
| Saos           | MYOD1 | path:05200_18 |
| Saos           | MYOD1 | path:05200_15 |
| Saos           | MYOD1 | path:05200_39 |
| Saos           | MYOD1 | path:05200_24 |
| Saos           | MYOD1 | path:05200_38 |
| skeletal       | BCL6  | path:04110_5  |
| skeletal       | BCL6  | path:04110_11 |
| skeletal       | BCL6  | path:04110_13 |
| skeletal       | BCL6  | path:04110_7  |
| skeletal       | BCL6  | path:04110_2  |
| skeletal       | BCL6  | path:04110_10 |
| skeletal       | BCL6  | path:04110_1  |
| skeletal       | BCL6  | path:04110_9  |
| skeletal       | BCL6  | path:04115_2  |
| skeletal       | BCL6  | path:04210_3  |
| skeletal       | BCL6  | path:04210_6  |
| skeletal       | BCL6  | path:04630_1  |
| skeletal       | BCL6  | path:05200_13 |
| skeletal       | BCL6  | path:05200_25 |
| skeletal       | BCL6  | path:05200_39 |
| skeletal       | BCL6  | path:05200_37 |
| skeletal       | BCL6  | path:05200_2  |
| skeletal       | BCL6  | path:05200_15 |
| skeletal       | BCL6  | path:05200_21 |
| skeletal       | BCL6  | path:05220_8  |
| skeletal       | FOXO3 | path:04920_2  |
| skeletal       | TP63  | path:04110_10 |
| skeletal       | TP63  | path:04110_5  |
| skeletal       | TP63  | path:04110_11 |
| skeletal       | TP63  | path:04110_1  |

|                 |       |               |
|-----------------|-------|---------------|
| skeletal        | TP63  | path:04110_7  |
| skeletal        | TP63  | path:04110_9  |
| skeletal        | TP63  | path:04110_2  |
| skeletal        | TP63  | path:04115_2  |
| skeletal        | TP63  | path:05200_15 |
| skeletal        | TP63  | path:05200_21 |
| skeletal        | TP63  | path:05200_7  |
| skeletal        | TP63  | path:05200_14 |
| skeletal        | TP63  | path:05200_20 |
| skeletal        | TP63  | path:05200_13 |
| skeletal        | TP63  | path:05200_39 |
| skeletal        | TP63  | path:05200_37 |
| skeletal        | TP63  | path:05200_9  |
| skeletal        | TP63  | path:05200_1  |
| skeletal        | TP63  | path:05200_2  |
| skeletal        | TP63  | path:05200_3  |
| skeletal        | TP63  | path:05200_25 |
| skeletal        | TP63  | path:05200_19 |
| skeletal        | TP63  | path:05214_3  |
| skeletal        | TP63  | path:05215_4  |
| skeletal        | TP63  | path:05215_10 |
| skeletal        | TP63  | path:05215_9  |
| skeletal        | TP63  | path:05215_6  |
| skeletal        | TP63  | path:05218_3  |
| skeletal        | TP63  | path:05218_5  |
| skeletal        | TP63  | path:05219_5  |
| skeletal        | TP63  | path:05219_3  |
| skeletal        | TP63  | path:05220_4  |
| small intestine | HNF4A | path:00010_1  |
| small intestine | HNF4A | path:00120_1  |
| small intestine | HNF4A | path:00140_1  |
| small intestine | HNF4A | path:00561_2  |
| small intestine | HNF4A | path:00590_1  |
| small intestine | HNF4A | path:00590_2  |
| small intestine | HNF4A | path:00591_1  |
| small intestine | HNF4A | path:00830_1  |
| small intestine | HNF4A | path:00980_1  |
| small intestine | HNF4A | path:00982_2  |
| small intestine | HNF4A | path:03320_1  |
| small intestine | HNF4A | path:04610_7  |
| small intestine | HNF4A | path:04610_6  |
| small intestine | HNF4A | path:04610_2  |
| small intestine | HNF4A | path:04610_1  |
| small intestine | HNF4A | path:04610_3  |

|                 |       |               |
|-----------------|-------|---------------|
| small intestine | HNF4A | path:04610_5  |
| small intestine | HNF4A | path:04610_4  |
| small intestine | HNF4A | path:04950_3  |
| small intestine | HNF4A | path:04950_2  |
| small intestine | NR1I2 | path:00830_1  |
| small intestine | NR1I2 | path:00980_1  |
| small intestine | NR1I2 | path:00982_2  |
| smooth          | KLF5  | path:05200_35 |
| smooth          | KLF5  | path:05200_25 |
| smooth          | KLF5  | path:05200_21 |
| smooth          | KLF5  | path:05200_37 |
| smooth          | KLF5  | path:05210_5  |
| smooth          | KLF5  | path:05210_8  |
| spleen          | AKNA  | path:04060_18 |
| spleen          | AKNA  | path:04514_8  |
| spleen          | AKNA  | path:04672_2  |
| spleen          | AKNA  | path:05144_4  |
| spleen          | AKNA  | path:05145_14 |
| spleen          | AKNA  | path:05310_1  |
| spleen          | AKNA  | path:05320_1  |
| spleen          | AKNA  | path:05322_3  |
| spleen          | AKNA  | path:05330_1  |
| spleen          | AKNA  | path:05416_3  |
| spleen          | CREB1 | path:04514_19 |
| spleen          | CREB1 | path:04612_3  |
| spleen          | CREB1 | path:04620_9  |
| spleen          | CREB1 | path:04620_6  |
| spleen          | CREB1 | path:04620_8  |
| spleen          | CREB1 | path:04620_4  |
| spleen          | CREB1 | path:04620_5  |
| spleen          | CREB1 | path:05142_3  |
| spleen          | ELF1  | path:00920_1  |
| spleen          | ELF1  | path:04060_34 |
| spleen          | ELF1  | path:04060_1  |
| spleen          | ELF1  | path:04650_10 |
| spleen          | ELF1  | path:04650_9  |
| spleen          | ELF1  | path:04650_2  |
| spleen          | ELF1  | path:04650_8  |
| spleen          | ELF1  | path:04650_4  |
| spleen          | ELF1  | path:04664_1  |
| spleen          | ELF1  | path:04664_2  |
| spleen          | ELF1  | path:04664_6  |
| spleen          | FLI1  | path:04512_1  |
| spleen          | FLI1  | path:04512_3  |



|        |       |               |
|--------|-------|---------------|
| spleen | HNF1A | path:00140_1  |
| spleen | HNF1A | path:00980_1  |
| spleen | HNF1A | path:00982_2  |
| spleen | HNF1A | path:04610_2  |
| spleen | HNF1A | path:04610_6  |
| spleen | HNF1A | path:04610_3  |
| spleen | HNF1A | path:04610_4  |
| spleen | HNF1A | path:04950_3  |
| spleen | IRF5  | path:04060_23 |
| spleen | IRF5  | path:04620_1  |
| spleen | IRF5  | path:04620_3  |
| spleen | IRF5  | path:04620_2  |
| spleen | IRF5  | path:04620_7  |
| spleen | IRF5  | path:04620_4  |
| spleen | IRF5  | path:04650_5  |
| spleen | IRF5  | path:04650_3  |
| spleen | IRF5  | path:05160_4  |
| spleen | IRF7  | path:04060_23 |
| spleen | IRF7  | path:04620_8  |
| spleen | IRF7  | path:04620_7  |
| spleen | IRF7  | path:04620_6  |
| spleen | IRF7  | path:04620_4  |
| spleen | IRF7  | path:04620_2  |
| spleen | IRF7  | path:04620_1  |
| spleen | IRF7  | path:04620_3  |
| spleen | IRF7  | path:04620_9  |
| spleen | IRF7  | path:04620_5  |
| spleen | IRF7  | path:04650_5  |
| spleen | IRF7  | path:04650_3  |
| spleen | IRF7  | path:05160_4  |
| spleen | SPI1  | path:04060_26 |
| spleen | SPI1  | path:04145_1  |
| spleen | SPI1  | path:04145_4  |
| spleen | SPI1  | path:04620_4  |
| spleen | SPI1  | path:04620_3  |
| spleen | SPI1  | path:04620_1  |
| spleen | SPI1  | path:04650_7  |
| spleen | SPI1  | path:04650_1  |
| spleen | SPI1  | path:04670_9  |
| spleen | SPI1  | path:04670_6  |
| spleen | SPI1  | path:04670_4  |
| spleen | SPI1  | path:04670_2  |
| spleen | SPI1  | path:04670_8  |
| spleen | SPI1  | path:04810_16 |

|         |       |               |
|---------|-------|---------------|
| spleen  | SPI1  | path:05140_3  |
| spleen  | SPI1  | path:05140_2  |
| spleen  | SPI1  | path:05146_1  |
| spleen  | SPI1  | path:05150_4  |
| spleen  | SPI1  | path:05200_34 |
| stomach | HNF1A | path:00140_1  |
| stomach | HNF1A | path:00980_1  |
| stomach | HNF1A | path:00982_2  |
| stomach | HNF1A | path:04610_6  |
| stomach | HNF1A | path:04610_2  |
| stomach | HNF1A | path:04610_3  |
| stomach | HNF1A | path:04610_4  |
| stomach | HNF1A | path:04950_3  |
| T cells | AKNA  | path:04060_18 |
| T cells | AKNA  | path:04514_8  |
| T cells | AKNA  | path:04672_2  |
| T cells | AKNA  | path:05144_4  |
| T cells | AKNA  | path:05145_14 |
| T cells | AKNA  | path:05310_1  |
| T cells | AKNA  | path:05320_1  |
| T cells | AKNA  | path:05322_3  |
| T cells | AKNA  | path:05330_1  |
| T cells | AKNA  | path:05416_3  |
| T cells | CREM  | path:05200_37 |
| T cells | CREM  | path:05200_35 |
| T cells | CREM  | path:05200_25 |
| T cells | CREM  | path:05200_38 |
| T cells | CREM  | path:05200_39 |
| T cells | CREM  | path:05210_8  |
| T cells | CREM  | path:05210_5  |
| T cells | ETS2  | path:04310_5  |
| T cells | ETS2  | path:04310_7  |
| T cells | ETS2  | path:05200_19 |
| T cells | ETS2  | path:05200_9  |
| T cells | ETS2  | path:05200_17 |
| T cells | ETS2  | path:05200_2  |
| T cells | FOXO3 | path:04920_2  |
| T cells | GATA3 | path:04612_4  |
| T cells | TCF7  | path:04660_15 |
| T47D    | ESR1  | path:00830_1  |
| T47D    | ESR1  | path:00980_1  |
| T47D    | ESR1  | path:00982_2  |
| T47D    | ESR1  | path:04115_2  |
| T47D    | ESR1  | path:04610_7  |

|      |      |               |
|------|------|---------------|
| T47D | ESR1 | path:04610_2  |
| T47D | ESR1 | path:04610_6  |
| T47D | ESR1 | path:05200_37 |
| T47D | ESR1 | path:05200_30 |
| T47D | ESR1 | path:05200_25 |
| T47D | ESR1 | path:05200_21 |
| T47D | ESR1 | path:05200_38 |
| T47D | ESR1 | path:05200_15 |
| T47D | ESR1 | path:05200_35 |
| T47D | ESR1 | path:05200_24 |
| T47D | ESR1 | path:05200_39 |
| T47D | ESR1 | path:05212_8  |
| T47D | ESR1 | path:05219_3  |
| T47D | NFIC | path:00140_1  |
| T47D | NFIC | path:00591_1  |
| T47D | NFIC | path:04010_22 |
| T47D | NFIC | path:04080_5  |
| T47D | NFIC | path:04115_2  |
| T47D | NFIC | path:04510_6  |
| T47D | NFIC | path:04512_2  |
| T47D | NFIC | path:04660_10 |
| T47D | NFIC | path:04660_9  |
| T47D | NFIC | path:04662_9  |
| T47D | NFIC | path:04662_5  |
| T47D | NFIC | path:04722_15 |
| T47D | NFIC | path:05200_7  |
| T47D | NFIC | path:05200_2  |
| T47D | NFIC | path:05200_13 |
| T47D | NFIC | path:05200_24 |
| T47D | NFIC | path:05200_6  |
| T47D | NFIC | path:05200_25 |
| T47D | NFIC | path:05200_26 |
| T47D | NFIC | path:05200_18 |
| T47D | NFIC | path:05200_39 |
| T47D | NFIC | path:05200_37 |
| T47D | NFIC | path:05200_15 |
| T47D | NFIC | path:05200_21 |
| T47D | NFIC | path:05214_3  |
| T47D | NFIC | path:05218_1  |
| T47D | NFIC | path:05218_3  |
| T47D | NFIC | path:05218_2  |
| T47D | NFIC | path:05219_3  |
| T47D | NFIC | path:05220_4  |
| T47D | SP1  | path:00140_1  |

|      |     |               |
|------|-----|---------------|
| T47D | SP1 | path:00330_3  |
| T47D | SP1 | path:00330_4  |
| T47D | SP1 | path:00330_1  |
| T47D | SP1 | path:00330_5  |
| T47D | SP1 | path:00350_2  |
| T47D | SP1 | path:00590_2  |
| T47D | SP1 | path:00980_1  |
| T47D | SP1 | path:04010_6  |
| T47D | SP1 | path:04010_8  |
| T47D | SP1 | path:04010_7  |
| T47D | SP1 | path:04060_19 |
| T47D | SP1 | path:04060_32 |
| T47D | SP1 | path:04060_20 |
| T47D | SP1 | path:04060_10 |
| T47D | SP1 | path:04060_46 |
| T47D | SP1 | path:04110_7  |
| T47D | SP1 | path:04110_9  |
| T47D | SP1 | path:04110_13 |
| T47D | SP1 | path:04110_4  |
| T47D | SP1 | path:04110_10 |
| T47D | SP1 | path:04110_11 |
| T47D | SP1 | path:04110_5  |
| T47D | SP1 | path:04110_2  |
| T47D | SP1 | path:04110_1  |
| T47D | SP1 | path:04115_2  |
| T47D | SP1 | path:04144_2  |
| T47D | SP1 | path:04210_5  |
| T47D | SP1 | path:04210_4  |
| T47D | SP1 | path:04210_9  |
| T47D | SP1 | path:04210_6  |
| T47D | SP1 | path:04310_7  |
| T47D | SP1 | path:04310_5  |
| T47D | SP1 | path:04350_5  |
| T47D | SP1 | path:04350_4  |
| T47D | SP1 | path:04350_1  |
| T47D | SP1 | path:04510_4  |
| T47D | SP1 | path:04510_14 |
| T47D | SP1 | path:04510_12 |
| T47D | SP1 | path:04510_6  |
| T47D | SP1 | path:04510_13 |
| T47D | SP1 | path:04510_7  |
| T47D | SP1 | path:04510_19 |
| T47D | SP1 | path:04510_5  |
| T47D | SP1 | path:04510_3  |

|      |     |               |
|------|-----|---------------|
| T47D | SP1 | path:04510_17 |
| T47D | SP1 | path:04510_10 |
| T47D | SP1 | path:04510_16 |
| T47D | SP1 | path:04510_1  |
| T47D | SP1 | path:04512_2  |
| T47D | SP1 | path:04512_3  |
| T47D | SP1 | path:04512_1  |
| T47D | SP1 | path:04520_2  |
| T47D | SP1 | path:04520_5  |
| T47D | SP1 | path:04540_7  |
| T47D | SP1 | path:04610_1  |
| T47D | SP1 | path:04610_7  |
| T47D | SP1 | path:04610_2  |
| T47D | SP1 | path:04610_5  |
| T47D | SP1 | path:04610_4  |
| T47D | SP1 | path:04610_6  |
| T47D | SP1 | path:04610_3  |
| T47D | SP1 | path:04620_9  |
| T47D | SP1 | path:04620_8  |
| T47D | SP1 | path:04620_6  |
| T47D | SP1 | path:04620_5  |
| T47D | SP1 | path:04630_2  |
| T47D | SP1 | path:04630_1  |
| T47D | SP1 | path:04650_3  |
| T47D | SP1 | path:04660_9  |
| T47D | SP1 | path:04662_9  |
| T47D | SP1 | path:04722_15 |
| T47D | SP1 | path:04810_16 |
| T47D | SP1 | path:04912_7  |
| T47D | SP1 | path:04940_2  |
| T47D | SP1 | path:05014_2  |
| T47D | SP1 | path:05014_1  |
| T47D | SP1 | path:05020_2  |
| T47D | SP1 | path:05020_1  |
| T47D | SP1 | path:05100_6  |
| T47D | SP1 | path:05140_4  |
| T47D | SP1 | path:05140_6  |
| T47D | SP1 | path:05142_11 |
| T47D | SP1 | path:05142_12 |
| T47D | SP1 | path:05142_3  |
| T47D | SP1 | path:05145_8  |
| T47D | SP1 | path:05145_6  |
| T47D | SP1 | path:05146_1  |
| T47D | SP1 | path:05200_31 |

|      |     |               |
|------|-----|---------------|
| T47D | SP1 | path:05200_7  |
| T47D | SP1 | path:05200_39 |
| T47D | SP1 | path:05200_20 |
| T47D | SP1 | path:05200_37 |
| T47D | SP1 | path:05200_6  |
| T47D | SP1 | path:05200_19 |
| T47D | SP1 | path:05200_35 |
| T47D | SP1 | path:05200_42 |
| T47D | SP1 | path:05200_8  |
| T47D | SP1 | path:05200_1  |
| T47D | SP1 | path:05200_38 |
| T47D | SP1 | path:05200_25 |
| T47D | SP1 | path:05200_16 |
| T47D | SP1 | path:05200_21 |
| T47D | SP1 | path:05200_24 |
| T47D | SP1 | path:05200_9  |
| T47D | SP1 | path:05200_33 |
| T47D | SP1 | path:05200_13 |
| T47D | SP1 | path:05200_30 |
| T47D | SP1 | path:05200_2  |
| T47D | SP1 | path:05200_18 |
| T47D | SP1 | path:05200_29 |
| T47D | SP1 | path:05200_34 |
| T47D | SP1 | path:05200_15 |
| T47D | SP1 | path:05200_41 |
| T47D | SP1 | path:05200_10 |
| T47D | SP1 | path:05200_32 |
| T47D | SP1 | path:05200_14 |
| T47D | SP1 | path:05200_26 |
| T47D | SP1 | path:05200_17 |
| T47D | SP1 | path:05210_5  |
| T47D | SP1 | path:05210_8  |
| T47D | SP1 | path:05212_3  |
| T47D | SP1 | path:05212_9  |
| T47D | SP1 | path:05212_8  |
| T47D | SP1 | path:05212_10 |
| T47D | SP1 | path:05214_2  |
| T47D | SP1 | path:05214_1  |
| T47D | SP1 | path:05214_3  |
| T47D | SP1 | path:05215_4  |
| T47D | SP1 | path:05215_10 |
| T47D | SP1 | path:05215_9  |
| T47D | SP1 | path:05215_6  |
| T47D | SP1 | path:05215_7  |

|      |       |               |
|------|-------|---------------|
| T47D | SP1   | path:05215_5  |
| T47D | SP1   | path:05216_3  |
| T47D | SP1   | path:05218_4  |
| T47D | SP1   | path:05218_1  |
| T47D | SP1   | path:05218_2  |
| T47D | SP1   | path:05218_3  |
| T47D | SP1   | path:05218_5  |
| T47D | SP1   | path:05219_3  |
| T47D | SP1   | path:05219_5  |
| T47D | SP1   | path:05220_5  |
| T47D | SP1   | path:05220_4  |
| T47D | SP1   | path:05220_8  |
| T47D | SP1   | path:05221_2  |
| T47D | SP1   | path:05222_5  |
| T47D | SP1   | path:05222_2  |
| T47D | SP1   | path:05222_1  |
| T47D | SP1   | path:05223_3  |
| T47D | SP1   | path:05223_1  |
| T47D | SP1   | path:05320_2  |
| T47D | SP1   | path:05330_2  |
| T47D | SP1   | path:05332_1  |
| T47D | SP1   | path:05414_2  |
| T98  | HIF1A | path:05200_37 |
| T98  | HIF1A | path:05200_39 |
| T98  | HIF1A | path:05200_25 |
| T98  | NFIC  | path:00140_1  |
| T98  | NFIC  | path:00591_1  |
| T98  | NFIC  | path:04010_22 |
| T98  | NFIC  | path:04080_5  |
| T98  | NFIC  | path:04115_2  |
| T98  | NFIC  | path:04510_6  |
| T98  | NFIC  | path:04512_2  |
| T98  | NFIC  | path:04660_10 |
| T98  | NFIC  | path:04660_9  |
| T98  | NFIC  | path:04662_5  |
| T98  | NFIC  | path:04662_9  |
| T98  | NFIC  | path:04722_15 |
| T98  | NFIC  | path:05200_24 |
| T98  | NFIC  | path:05200_7  |
| T98  | NFIC  | path:05200_21 |
| T98  | NFIC  | path:05200_25 |
| T98  | NFIC  | path:05200_26 |
| T98  | NFIC  | path:05200_13 |
| T98  | NFIC  | path:05200_2  |

|        |      |               |
|--------|------|---------------|
| T98    | NFIC | path:05200_6  |
| T98    | NFIC | path:05200_18 |
| T98    | NFIC | path:05200_39 |
| T98    | NFIC | path:05200_37 |
| T98    | NFIC | path:05200_15 |
| T98    | NFIC | path:05214_3  |
| T98    | NFIC | path:05218_3  |
| T98    | NFIC | path:05218_2  |
| T98    | NFIC | path:05218_1  |
| T98    | NFIC | path:05219_3  |
| T98    | NFIC | path:05220_4  |
| T-cell | EGR1 | path:04144_2  |
| T-cell | EGR1 | path:04350_5  |
| T-cell | EGR1 | path:04350_1  |
| T-cell | EGR1 | path:04510_6  |
| T-cell | EGR1 | path:04510_7  |
| T-cell | EGR1 | path:04510_5  |
| T-cell | EGR1 | path:04510_12 |
| T-cell | EGR1 | path:04510_13 |
| T-cell | EGR1 | path:04512_2  |
| T-cell | EGR1 | path:04512_1  |
| T-cell | EGR1 | path:04512_3  |
| T-cell | EGR1 | path:05020_2  |
| T-cell | EGR1 | path:05200_24 |
| T-cell | EGR1 | path:05200_29 |
| T-cell | EGR1 | path:05200_37 |
| T-cell | EGR1 | path:05200_35 |
| T-cell | EGR1 | path:05200_16 |
| T-cell | EGR1 | path:05200_31 |
| T-cell | EGR1 | path:05200_30 |
| T-cell | EGR1 | path:05200_25 |
| T-cell | EGR1 | path:05212_3  |
| T-cell | EGR1 | path:05212_8  |
| T-cell | EGR1 | path:05215_7  |
| T-cell | EGR1 | path:05215_9  |
| T-cell | EGR1 | path:05218_4  |
| T-cell | ETS1 | path:04060_46 |
| T-cell | ETS1 | path:04610_4  |
| T-cell | ETS1 | path:04610_1  |
| T-cell | ETS1 | path:04610_3  |
| T-cell | ETS1 | path:04610_2  |
| T-cell | ETS1 | path:04612_4  |
| T-cell | ETS1 | path:04620_9  |
| T-cell | ETS1 | path:04620_5  |



|        |        |               |
|--------|--------|---------------|
| T-cell | ETS1   | path:04620_6  |
| T-cell | ETS1   | path:04620_1  |
| T-cell | ETS1   | path:04620_3  |
| T-cell | ETS1   | path:05212_3  |
| T-cell | ETS1   | path:05212_1  |
| T-cell | ETS1   | path:05212_2  |
| T-cell | ETS1   | path:05212_8  |
| T-cell | ETS1   | path:05212_6  |
| T-cell | ETS1   | path:05215_4  |
| T-cell | ETS1   | path:05215_9  |
| T-cell | LEF1   | path:04310_5  |
| T-cell | LEF1   | path:04310_7  |
| T-cell | LEF1   | path:04916_6  |
| T-cell | LEF1   | path:04916_3  |
| T-cell | LEF1   | path:04916_8  |
| T-cell | LEF1   | path:05200_18 |
| T-cell | LEF1   | path:05200_34 |
| T-cell | LEF1   | path:05200_35 |
| T-cell | LEF1   | path:05200_25 |
| T-cell | LEF1   | path:05200_21 |
| T-cell | LEF1   | path:05200_26 |
| T-cell | LEF1   | path:05200_15 |
| T-cell | LEF1   | path:05200_37 |
| T-cell | LEF1   | path:05200_39 |
| T-cell | LEF1   | path:05200_38 |
| T-cell | LEF1   | path:05210_5  |
| T-cell | LEF1   | path:05210_8  |
| T-cell | LEF1   | path:05213_1  |
| T-cell | LEF1   | path:05215_5  |
| T-cell | LEF1   | path:05216_3  |
| T-cell | LEF1   | path:05221_2  |
| T-cell | LEF1   | path:05222_5  |
| T-cell | LEF1   | path:05222_1  |
| T-cell | NFATC1 | path:04060_20 |
| T-cell | NFATC1 | path:04060_34 |
| T-cell | NFATC1 | path:04060_19 |
| T-cell | SPI1   | path:04060_26 |
| T-cell | SPI1   | path:04145_1  |
| T-cell | SPI1   | path:04145_4  |
| T-cell | SPI1   | path:04620_3  |
| T-cell | SPI1   | path:04620_4  |
| T-cell | SPI1   | path:04620_1  |
| T-cell | SPI1   | path:04650_1  |
| T-cell | SPI1   | path:04650_7  |

|        |       |               |
|--------|-------|---------------|
| T-cell | SPI1  | path:04670_8  |
| T-cell | SPI1  | path:04670_4  |
| T-cell | SPI1  | path:04670_6  |
| T-cell | SPI1  | path:04670_9  |
| T-cell | SPI1  | path:04670_2  |
| T-cell | SPI1  | path:04810_16 |
| T-cell | SPI1  | path:05140_2  |
| T-cell | SPI1  | path:05140_3  |
| T-cell | SPI1  | path:05146_1  |
| T-cell | SPI1  | path:05150_4  |
| T-cell | SPI1  | path:05200_34 |
| testis | AKNA  | path:04060_18 |
| testis | AKNA  | path:04514_8  |
| testis | AKNA  | path:04672_2  |
| testis | AKNA  | path:05144_4  |
| testis | AKNA  | path:05145_14 |
| testis | AKNA  | path:05310_1  |
| testis | AKNA  | path:05320_1  |
| testis | AKNA  | path:05322_3  |
| testis | AKNA  | path:05330_1  |
| testis | AKNA  | path:05416_3  |
| testis | CREB1 | path:04514_19 |
| testis | CREB1 | path:04612_3  |
| testis | CREB1 | path:04620_9  |
| testis | CREB1 | path:04620_5  |
| testis | CREB1 | path:04620_6  |
| testis | CREB1 | path:04620_8  |
| testis | CREB1 | path:04620_4  |
| testis | CREB1 | path:05142_3  |
| testis | ELK1  | path:04010_11 |
| testis | ELK1  | path:04010_4  |
| testis | ELK1  | path:05020_3  |
| testis | ELK1  | path:05020_4  |
| testis | ELK1  | path:05110_3  |
| testis | ELK1  | path:05200_26 |
| testis | ELK1  | path:05200_18 |
| testis | HNF4A | path:00010_1  |
| testis | HNF4A | path:00120_1  |
| testis | HNF4A | path:00140_1  |
| testis | HNF4A | path:00561_2  |
| testis | HNF4A | path:00590_1  |
| testis | HNF4A | path:00590_2  |
| testis | HNF4A | path:00591_1  |
| testis | HNF4A | path:00830_1  |

|        |       |               |
|--------|-------|---------------|
| testis | HNF4A | path:00980_1  |
| testis | HNF4A | path:00982_2  |
| testis | HNF4A | path:03320_1  |
| testis | HNF4A | path:04610_7  |
| testis | HNF4A | path:04610_6  |
| testis | HNF4A | path:04610_1  |
| testis | HNF4A | path:04610_2  |
| testis | HNF4A | path:04610_3  |
| testis | HNF4A | path:04610_5  |
| testis | HNF4A | path:04610_4  |
| testis | HNF4A | path:04950_2  |
| testis | HNF4A | path:04950_3  |
| testis | KLF5  | path:05200_35 |
| testis | KLF5  | path:05200_25 |
| testis | KLF5  | path:05200_37 |
| testis | KLF5  | path:05200_21 |
| testis | KLF5  | path:05210_5  |
| testis | KLF5  | path:05210_8  |
| testis | SPI1  | path:04060_26 |
| testis | SPI1  | path:04145_4  |
| testis | SPI1  | path:04145_1  |
| testis | SPI1  | path:04620_3  |
| testis | SPI1  | path:04620_4  |
| testis | SPI1  | path:04620_1  |
| testis | SPI1  | path:04650_7  |
| testis | SPI1  | path:04650_1  |
| testis | SPI1  | path:04670_4  |
| testis | SPI1  | path:04670_9  |
| testis | SPI1  | path:04670_8  |
| testis | SPI1  | path:04670_6  |
| testis | SPI1  | path:04670_2  |
| testis | SPI1  | path:04810_16 |
| testis | SPI1  | path:05140_2  |
| testis | SPI1  | path:05140_3  |
| testis | SPI1  | path:05146_1  |
| testis | SPI1  | path:05150_4  |
| testis | SPI1  | path:05200_34 |
| testis | TP53  | path:04010_11 |
| testis | TP53  | path:04012_1  |
| testis | TP53  | path:04012_5  |
| testis | TP53  | path:04110_2  |
| testis | TP53  | path:04110_13 |
| testis | TP53  | path:04110_7  |
| testis | TP53  | path:04110_9  |

|        |      |               |
|--------|------|---------------|
| testis | TP53 | path:04110_11 |
| testis | TP53 | path:04110_6  |
| testis | TP53 | path:04110_1  |
| testis | TP53 | path:04110_5  |
| testis | TP53 | path:04110_10 |
| testis | TP53 | path:04115_2  |
| testis | TP53 | path:04210_9  |
| testis | TP53 | path:04210_8  |
| testis | TP53 | path:04360_3  |
| testis | TP53 | path:04510_6  |
| testis | TP53 | path:04510_19 |
| testis | TP53 | path:04510_4  |
| testis | TP53 | path:04510_13 |
| testis | TP53 | path:04510_12 |
| testis | TP53 | path:04650_3  |
| testis | TP53 | path:04722_15 |
| testis | TP53 | path:04912_7  |
| testis | TP53 | path:05014_2  |
| testis | TP53 | path:05160_10 |
| testis | TP53 | path:05160_9  |
| testis | TP53 | path:05200_37 |
| testis | TP53 | path:05200_6  |
| testis | TP53 | path:05200_10 |
| testis | TP53 | path:05200_15 |
| testis | TP53 | path:05200_13 |
| testis | TP53 | path:05200_24 |
| testis | TP53 | path:05200_3  |
| testis | TP53 | path:05200_2  |
| testis | TP53 | path:05200_9  |
| testis | TP53 | path:05200_7  |
| testis | TP53 | path:05200_20 |
| testis | TP53 | path:05200_14 |
| testis | TP53 | path:05200_25 |
| testis | TP53 | path:05200_26 |
| testis | TP53 | path:05200_38 |
| testis | TP53 | path:05200_16 |
| testis | TP53 | path:05200_8  |
| testis | TP53 | path:05200_1  |
| testis | TP53 | path:05200_17 |
| testis | TP53 | path:05200_18 |
| testis | TP53 | path:05200_19 |
| testis | TP53 | path:05200_21 |
| testis | TP53 | path:05200_39 |
| testis | TP53 | path:05213_3  |

|        |       |               |
|--------|-------|---------------|
| testis | TP53  | path:05214_1  |
| testis | TP53  | path:05214_2  |
| testis | TP53  | path:05214_3  |
| testis | TP53  | path:05215_6  |
| testis | TP53  | path:05215_4  |
| testis | TP53  | path:05215_7  |
| testis | TP53  | path:05215_9  |
| testis | TP53  | path:05215_10 |
| testis | TP53  | path:05218_1  |
| testis | TP53  | path:05218_3  |
| testis | TP53  | path:05218_2  |
| testis | TP53  | path:05218_5  |
| testis | TP53  | path:05219_5  |
| testis | TP53  | path:05219_3  |
| testis | TP53  | path:05220_4  |
| testis | TP53  | path:05223_2  |
| thymus | AKNA  | path:04060_18 |
| thymus | AKNA  | path:04514_8  |
| thymus | AKNA  | path:04672_2  |
| thymus | AKNA  | path:05144_4  |
| thymus | AKNA  | path:05145_14 |
| thymus | AKNA  | path:05310_1  |
| thymus | AKNA  | path:05320_1  |
| thymus | AKNA  | path:05322_3  |
| thymus | AKNA  | path:05330_1  |
| thymus | AKNA  | path:05416_3  |
| thymus | CREB1 | path:04514_19 |
| thymus | CREB1 | path:04612_3  |
| thymus | CREB1 | path:04620_9  |
| thymus | CREB1 | path:04620_6  |
| thymus | CREB1 | path:04620_5  |
| thymus | CREB1 | path:04620_8  |
| thymus | CREB1 | path:04620_4  |
| thymus | CREB1 | path:05142_3  |
| thymus | ELF1  | path:00920_1  |
| thymus | ELF1  | path:04060_34 |
| thymus | ELF1  | path:04060_1  |
| thymus | ELF1  | path:04650_8  |
| thymus | ELF1  | path:04650_2  |
| thymus | ELF1  | path:04650_4  |
| thymus | ELF1  | path:04650_10 |
| thymus | ELF1  | path:04650_9  |
| thymus | ELF1  | path:04664_1  |
| thymus | ELF1  | path:04664_6  |

|        |      |               |
|--------|------|---------------|
| thymus | ELF1 | path:04664_2  |
| thymus | FLI1 | path:04512_1  |
| thymus | FLI1 | path:04512_3  |
| thymus | IRF5 | path:04060_23 |
| thymus | IRF5 | path:04620_1  |
| thymus | IRF5 | path:04620_3  |
| thymus | IRF5 | path:04620_4  |
| thymus | IRF5 | path:04620_2  |
| thymus | IRF5 | path:04620_7  |
| thymus | IRF5 | path:04650_5  |
| thymus | IRF5 | path:04650_3  |
| thymus | IRF5 | path:05160_4  |
| thymus | IRF7 | path:04060_23 |
| thymus | IRF7 | path:04620_6  |
| thymus | IRF7 | path:04620_4  |
| thymus | IRF7 | path:04620_7  |
| thymus | IRF7 | path:04620_8  |
| thymus | IRF7 | path:04620_1  |
| thymus | IRF7 | path:04620_9  |
| thymus | IRF7 | path:04620_3  |
| thymus | IRF7 | path:04620_5  |
| thymus | IRF7 | path:04620_2  |
| thymus | IRF7 | path:04650_5  |
| thymus | IRF7 | path:04650_3  |
| thymus | IRF7 | path:05160_4  |
| thymus | LEF1 | path:04310_5  |
| thymus | LEF1 | path:04310_7  |
| thymus | LEF1 | path:04916_6  |
| thymus | LEF1 | path:04916_8  |
| thymus | LEF1 | path:04916_3  |
| thymus | LEF1 | path:05200_21 |
| thymus | LEF1 | path:05200_35 |
| thymus | LEF1 | path:05200_34 |
| thymus | LEF1 | path:05200_37 |
| thymus | LEF1 | path:05200_25 |
| thymus | LEF1 | path:05200_39 |
| thymus | LEF1 | path:05200_38 |
| thymus | LEF1 | path:05200_15 |
| thymus | LEF1 | path:05200_26 |
| thymus | LEF1 | path:05200_18 |
| thymus | LEF1 | path:05210_5  |
| thymus | LEF1 | path:05210_8  |
| thymus | LEF1 | path:05213_1  |
| thymus | LEF1 | path:05215_5  |

|        |      |               |
|--------|------|---------------|
| thymus | LEF1 | path:05216_3  |
| thymus | LEF1 | path:05221_2  |
| thymus | LEF1 | path:05222_5  |
| thymus | LEF1 | path:05222_1  |
| thymus | SPI1 | path:04060_26 |
| thymus | SPI1 | path:04145_4  |
| thymus | SPI1 | path:04145_1  |
| thymus | SPI1 | path:04620_3  |
| thymus | SPI1 | path:04620_4  |
| thymus | SPI1 | path:04620_1  |
| thymus | SPI1 | path:04650_7  |
| thymus | SPI1 | path:04650_1  |
| thymus | SPI1 | path:04670_4  |
| thymus | SPI1 | path:04670_8  |
| thymus | SPI1 | path:04670_9  |
| thymus | SPI1 | path:04670_6  |
| thymus | SPI1 | path:04670_2  |
| thymus | SPI1 | path:04810_16 |
| thymus | SPI1 | path:05140_2  |
| thymus | SPI1 | path:05140_3  |
| thymus | SPI1 | path:05146_1  |
| thymus | SPI1 | path:05150_4  |
| thymus | SPI1 | path:05200_34 |
| thymus | TP63 | path:04110_11 |
| thymus | TP63 | path:04110_7  |
| thymus | TP63 | path:04110_5  |
| thymus | TP63 | path:04110_10 |
| thymus | TP63 | path:04110_2  |
| thymus | TP63 | path:04110_1  |
| thymus | TP63 | path:04110_9  |
| thymus | TP63 | path:04115_2  |
| thymus | TP63 | path:05200_19 |
| thymus | TP63 | path:05200_25 |
| thymus | TP63 | path:05200_39 |
| thymus | TP63 | path:05200_9  |
| thymus | TP63 | path:05200_21 |
| thymus | TP63 | path:05200_7  |
| thymus | TP63 | path:05200_14 |
| thymus | TP63 | path:05200_15 |
| thymus | TP63 | path:05200_2  |
| thymus | TP63 | path:05200_13 |
| thymus | TP63 | path:05200_3  |
| thymus | TP63 | path:05200_20 |
| thymus | TP63 | path:05200_37 |

|         |       |               |
|---------|-------|---------------|
| thymus  | TP63  | path:05200_1  |
| thymus  | TP63  | path:05214_3  |
| thymus  | TP63  | path:05215_4  |
| thymus  | TP63  | path:05215_6  |
| thymus  | TP63  | path:05215_9  |
| thymus  | TP63  | path:05215_10 |
| thymus  | TP63  | path:05218_5  |
| thymus  | TP63  | path:05218_3  |
| thymus  | TP63  | path:05219_3  |
| thymus  | TP63  | path:05219_5  |
| thymus  | TP63  | path:05220_4  |
| thyroid | HNF1A | path:00140_1  |
| thyroid | HNF1A | path:00980_1  |
| thyroid | HNF1A | path:00982_2  |
| thyroid | HNF1A | path:04610_2  |
| thyroid | HNF1A | path:04610_6  |
| thyroid | HNF1A | path:04610_3  |
| thyroid | HNF1A | path:04610_4  |
| thyroid | HNF1A | path:04950_3  |
| thyroid | NR4A1 | path:00140_1  |
| trachea | TP63  | path:04110_11 |
| trachea | TP63  | path:04110_5  |
| trachea | TP63  | path:04110_7  |
| trachea | TP63  | path:04110_1  |
| trachea | TP63  | path:04110_10 |
| trachea | TP63  | path:04110_9  |
| trachea | TP63  | path:04110_2  |
| trachea | TP63  | path:04115_2  |
| trachea | TP63  | path:05200_39 |
| trachea | TP63  | path:05200_19 |
| trachea | TP63  | path:05200_25 |
| trachea | TP63  | path:05200_9  |
| trachea | TP63  | path:05200_7  |
| trachea | TP63  | path:05200_15 |
| trachea | TP63  | path:05200_14 |
| trachea | TP63  | path:05200_21 |
| trachea | TP63  | path:05200_13 |
| trachea | TP63  | path:05200_1  |
| trachea | TP63  | path:05200_20 |
| trachea | TP63  | path:05200_3  |
| trachea | TP63  | path:05200_2  |
| trachea | TP63  | path:05200_37 |
| trachea | TP63  | path:05214_3  |
| trachea | TP63  | path:05215_4  |



|             |       |               |
|-------------|-------|---------------|
| trachea     | TP63  | path:05215_6  |
| trachea     | TP63  | path:05215_10 |
| trachea     | TP63  | path:05215_9  |
| trachea     | TP63  | path:05218_3  |
| trachea     | TP63  | path:05218_5  |
| trachea     | TP63  | path:05219_3  |
| trachea     | TP63  | path:05219_5  |
| trachea     | TP63  | path:05220_4  |
| trophoblast | GATA2 | path:04060_32 |
| trophoblast | GATA3 | path:04612_4  |
| U251        | HIF1A | path:05200_37 |
| U251        | HIF1A | path:05200_39 |
| U251        | HIF1A | path:05200_25 |
| U251        | NFIC  | path:00140_1  |
| U251        | NFIC  | path:00591_1  |
| U251        | NFIC  | path:04010_22 |
| U251        | NFIC  | path:04080_5  |
| U251        | NFIC  | path:04115_2  |
| U251        | NFIC  | path:04510_6  |
| U251        | NFIC  | path:04512_2  |
| U251        | NFIC  | path:04660_10 |
| U251        | NFIC  | path:04660_9  |
| U251        | NFIC  | path:04662_9  |
| U251        | NFIC  | path:04662_5  |
| U251        | NFIC  | path:04722_15 |
| U251        | NFIC  | path:05200_7  |
| U251        | NFIC  | path:05200_2  |
| U251        | NFIC  | path:05200_24 |
| U251        | NFIC  | path:05200_13 |
| U251        | NFIC  | path:05200_25 |
| U251        | NFIC  | path:05200_6  |
| U251        | NFIC  | path:05200_26 |
| U251        | NFIC  | path:05200_18 |
| U251        | NFIC  | path:05200_37 |
| U251        | NFIC  | path:05200_15 |
| U251        | NFIC  | path:05200_21 |
| U251        | NFIC  | path:05200_39 |
| U251        | NFIC  | path:05214_3  |
| U251        | NFIC  | path:05218_1  |
| U251        | NFIC  | path:05218_2  |
| U251        | NFIC  | path:05218_3  |
| U251        | NFIC  | path:05219_3  |
| U251        | NFIC  | path:05220_4  |
| UT-7        | GATA1 | path:04060_32 |

|        |      |               |
|--------|------|---------------|
| uterus | TP63 | path:04110_5  |
| uterus | TP63 | path:04110_9  |
| uterus | TP63 | path:04110_1  |
| uterus | TP63 | path:04110_2  |
| uterus | TP63 | path:04110_11 |
| uterus | TP63 | path:04110_10 |
| uterus | TP63 | path:04110_7  |
| uterus | TP63 | path:04115_2  |
| uterus | TP63 | path:05200_2  |
| uterus | TP63 | path:05200_39 |
| uterus | TP63 | path:05200_9  |
| uterus | TP63 | path:05200_37 |
| uterus | TP63 | path:05200_7  |
| uterus | TP63 | path:05200_19 |
| uterus | TP63 | path:05200_1  |
| uterus | TP63 | path:05200_15 |
| uterus | TP63 | path:05200_13 |
| uterus | TP63 | path:05200_3  |
| uterus | TP63 | path:05200_14 |
| uterus | TP63 | path:05200_20 |
| uterus | TP63 | path:05200_25 |
| uterus | TP63 | path:05200_21 |
| uterus | TP63 | path:05214_3  |
| uterus | TP63 | path:05215_4  |
| uterus | TP63 | path:05215_6  |
| uterus | TP63 | path:05215_10 |
| uterus | TP63 | path:05215_9  |
| uterus | TP63 | path:05218_3  |
| uterus | TP63 | path:05218_5  |
| uterus | TP63 | path:05219_5  |
| uterus | TP63 | path:05219_3  |
| uterus | TP63 | path:05220_4  |

---

**Table S10. Real vs. random Jaccard coefficient of the TSN with k=4 at the every pathway level**

|               | Subpathway               | Pathway                 | Pathway Class           |
|---------------|--------------------------|-------------------------|-------------------------|
| common-motif  | 0.0705 vs. 0.0628        | 0.1067 vs 0.0860        | 0.3864 vs 0.3706        |
|               | ( $p = 0.0020$ )         | ( $p < 1.0\text{e-}6$ ) | ( $p = 0.0075$ )        |
| common-family | 0.1406 vs 0.0099         | 0.1727 vs 0.0893        | 0.3745 vs 0.2981        |
|               | ( $p < 1.0\text{e-}6$ ), | ( $p < 1.0\text{e-}6$ ) | ( $p < 1.0\text{e-}6$ ) |
| common-tissue | 0.0486 vs 0.0088         | 0.0790 vs 0.0769        | 0.4086 vs 0.2956        |
|               | ( $p < 1.0\text{e-}6$ )  | ( $p < 1.0\text{e-}6$ ) | ( $p < 1.0\text{e-}6$ ) |
